# Supplementary material for: Genome-wide QTL mapping results for regional DXA body composition and bone mineral density traits in pigs
Source: Copernicus journal article supplement (doi:10.5194/aab-60-51-2017), 2017-04-05

Fat - Chromosome 1

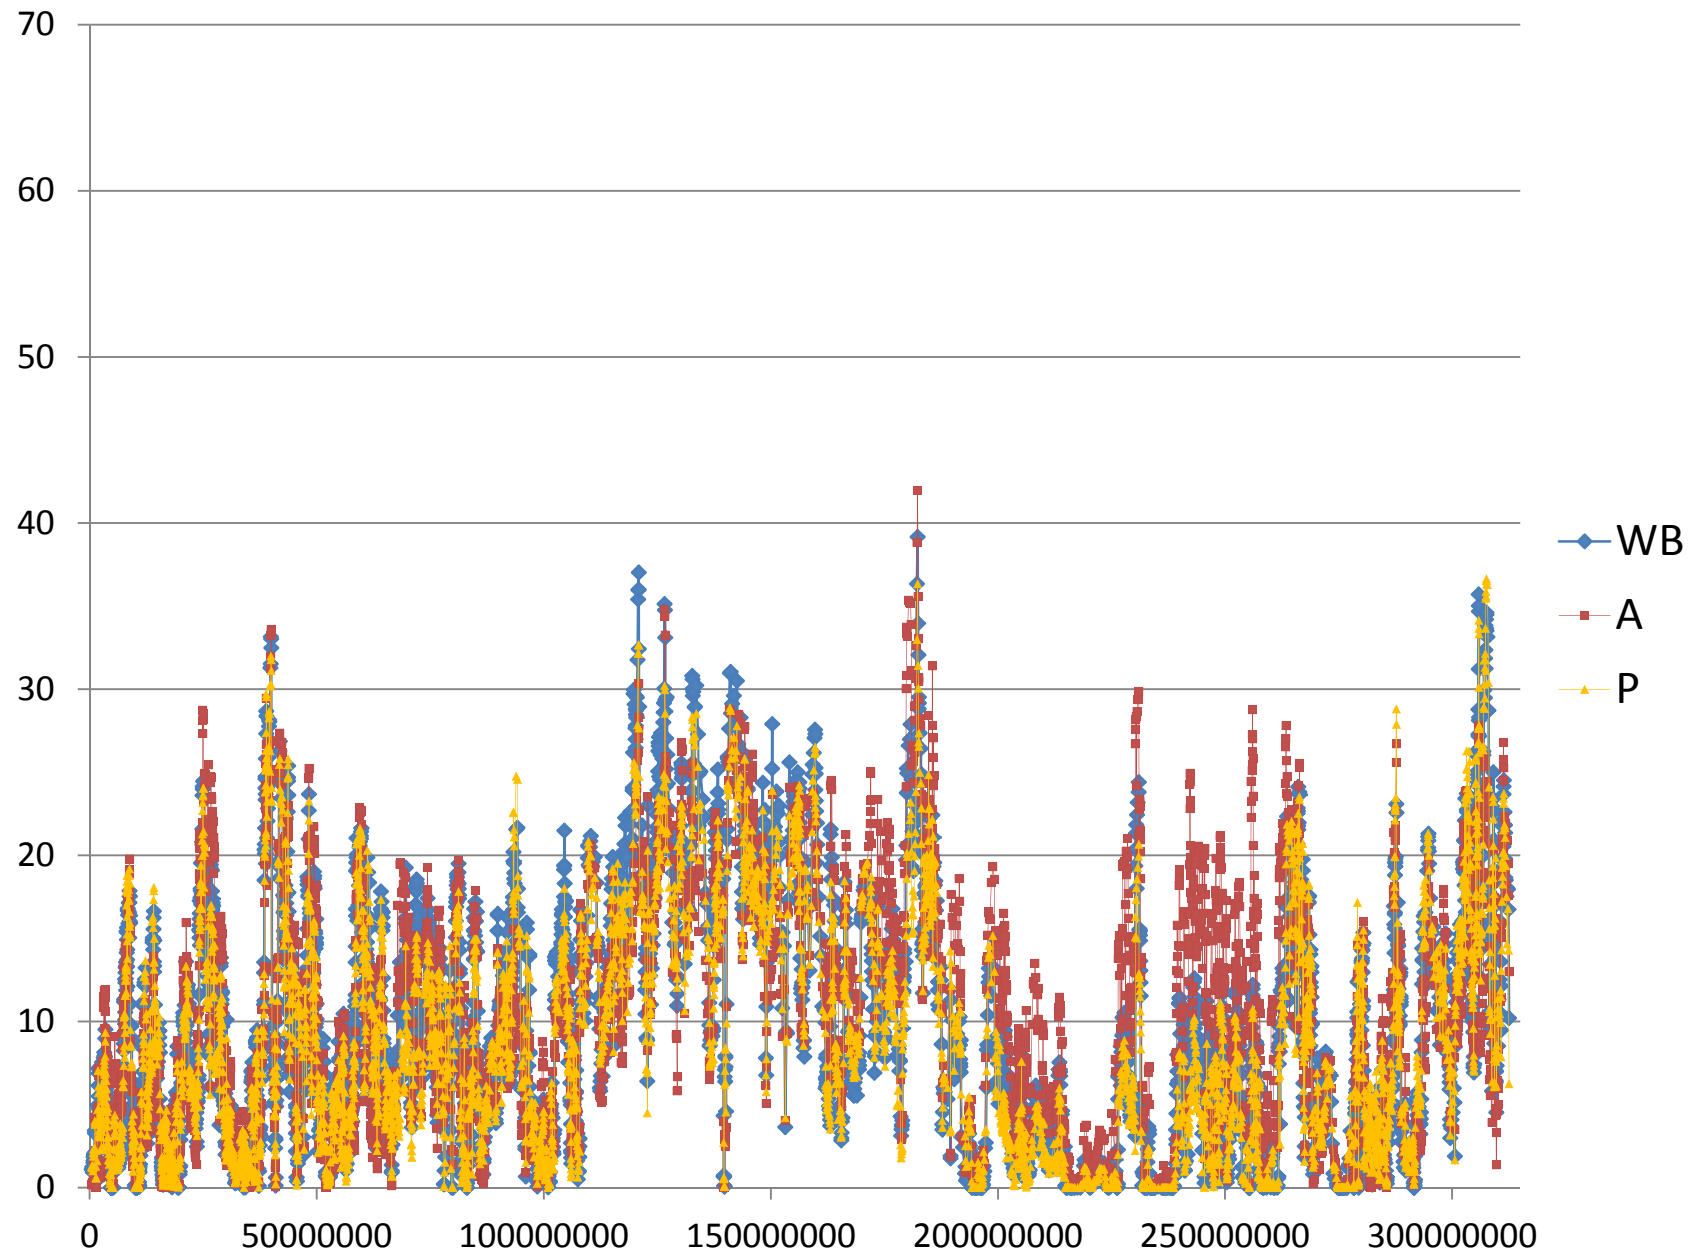

Fat - Chromosome 2

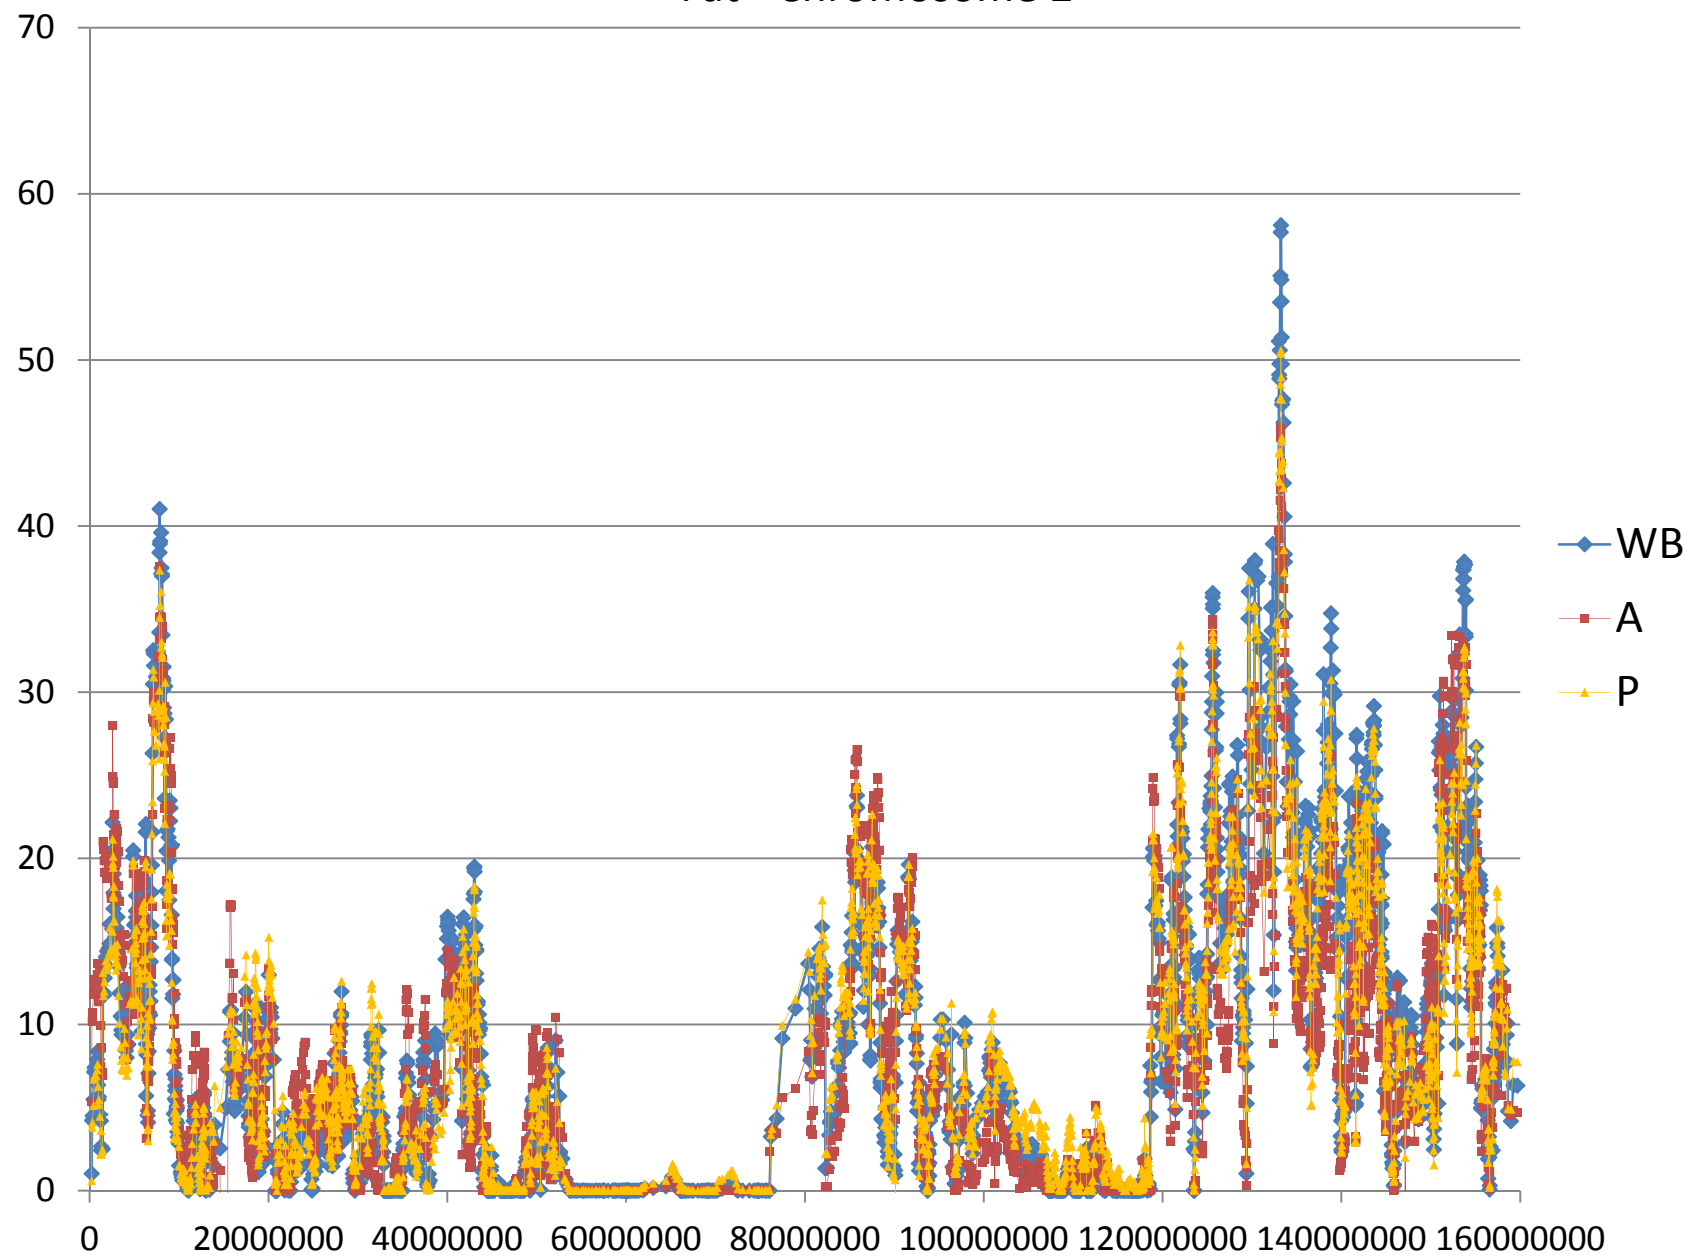

# Fat - Chromosome 3

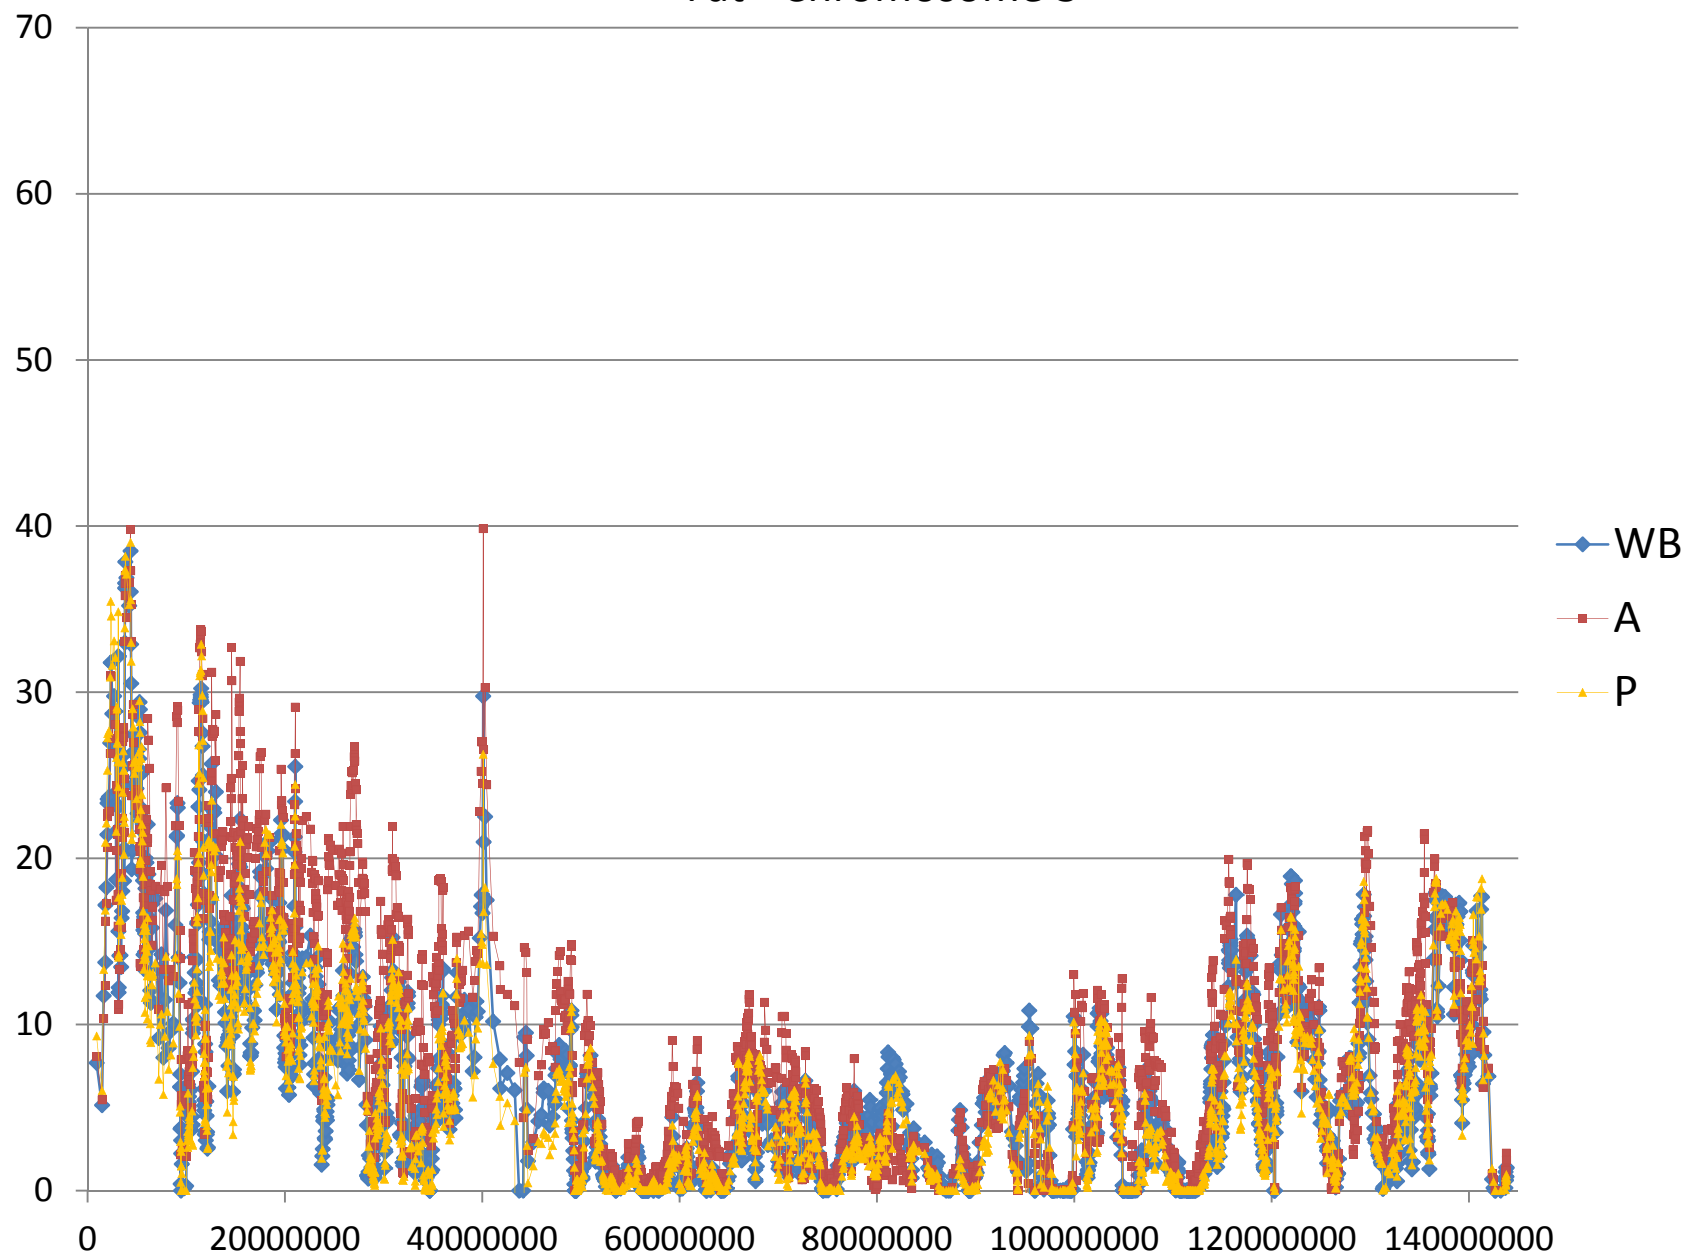

Fat - Chromosome 4

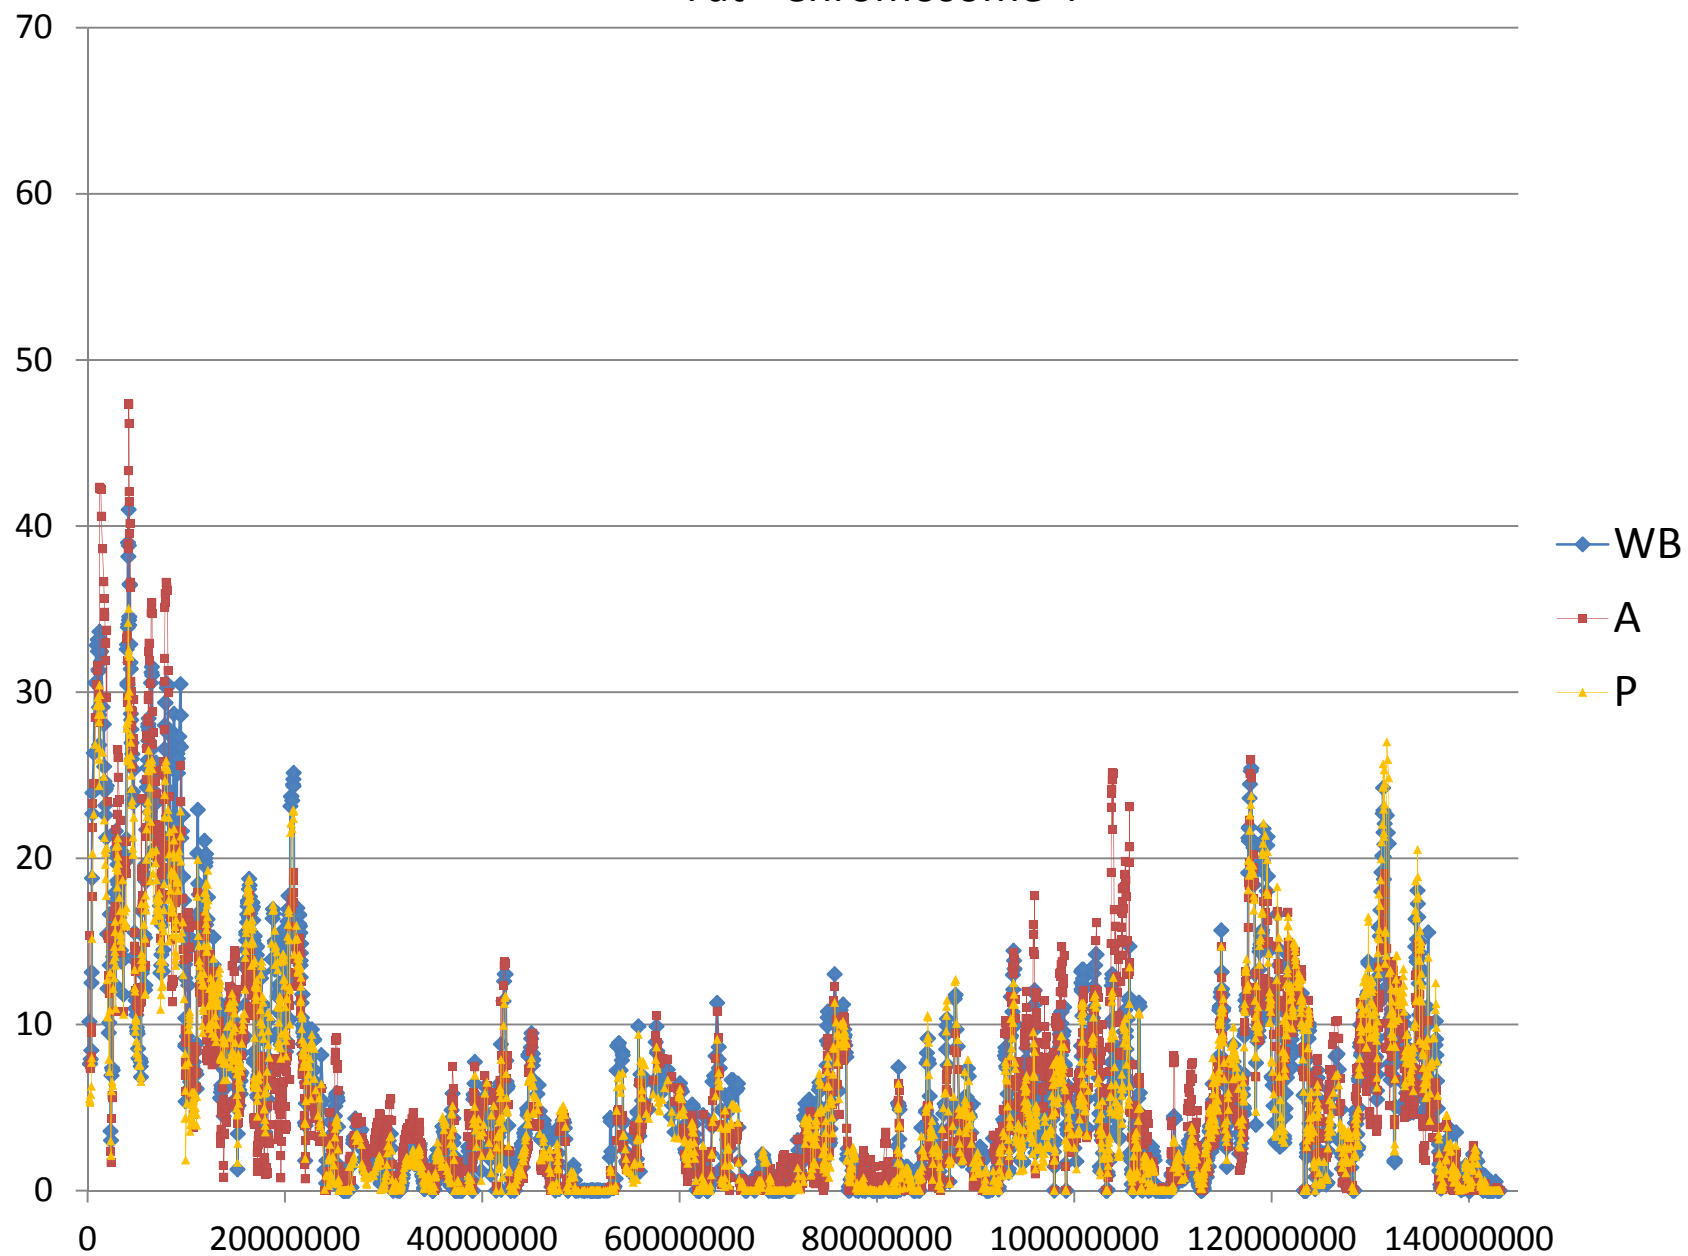

# Fat - Chromosome 5

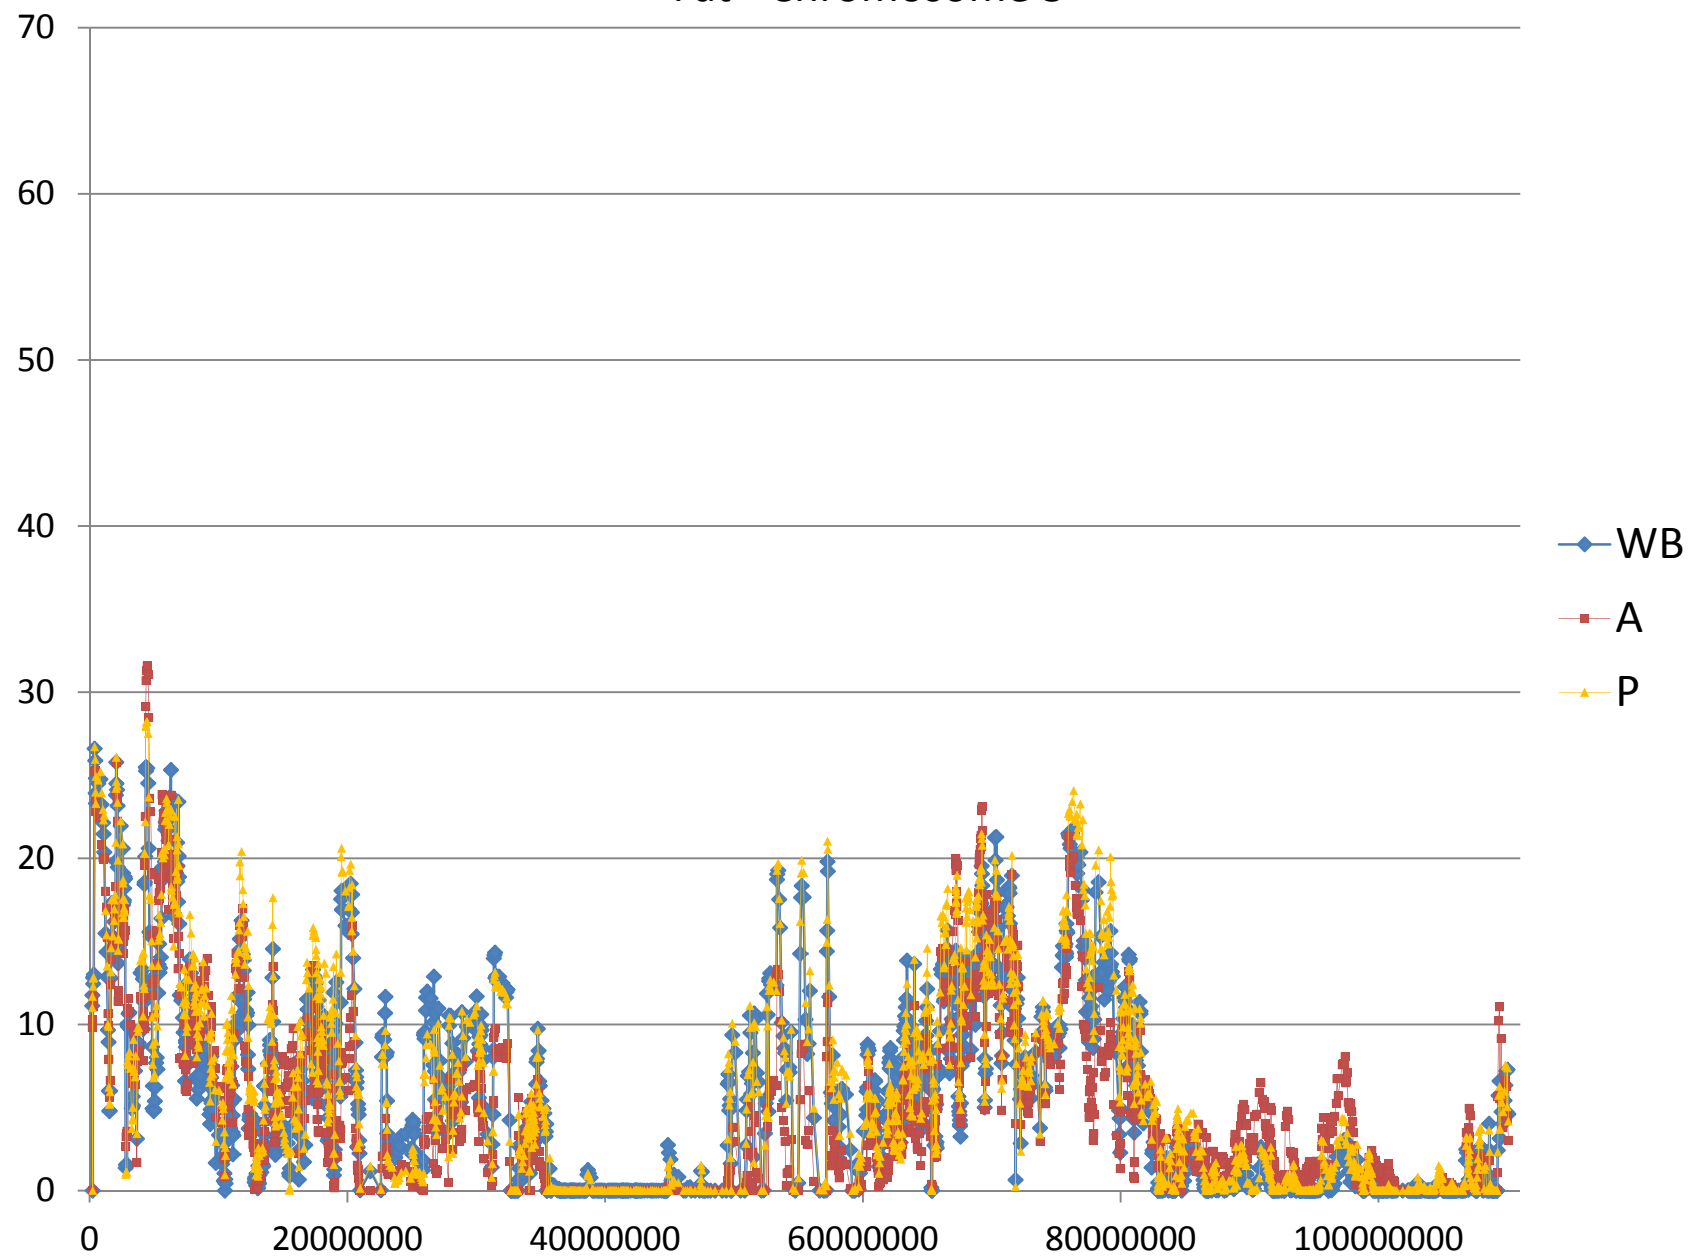

Fat - Chromosome 6

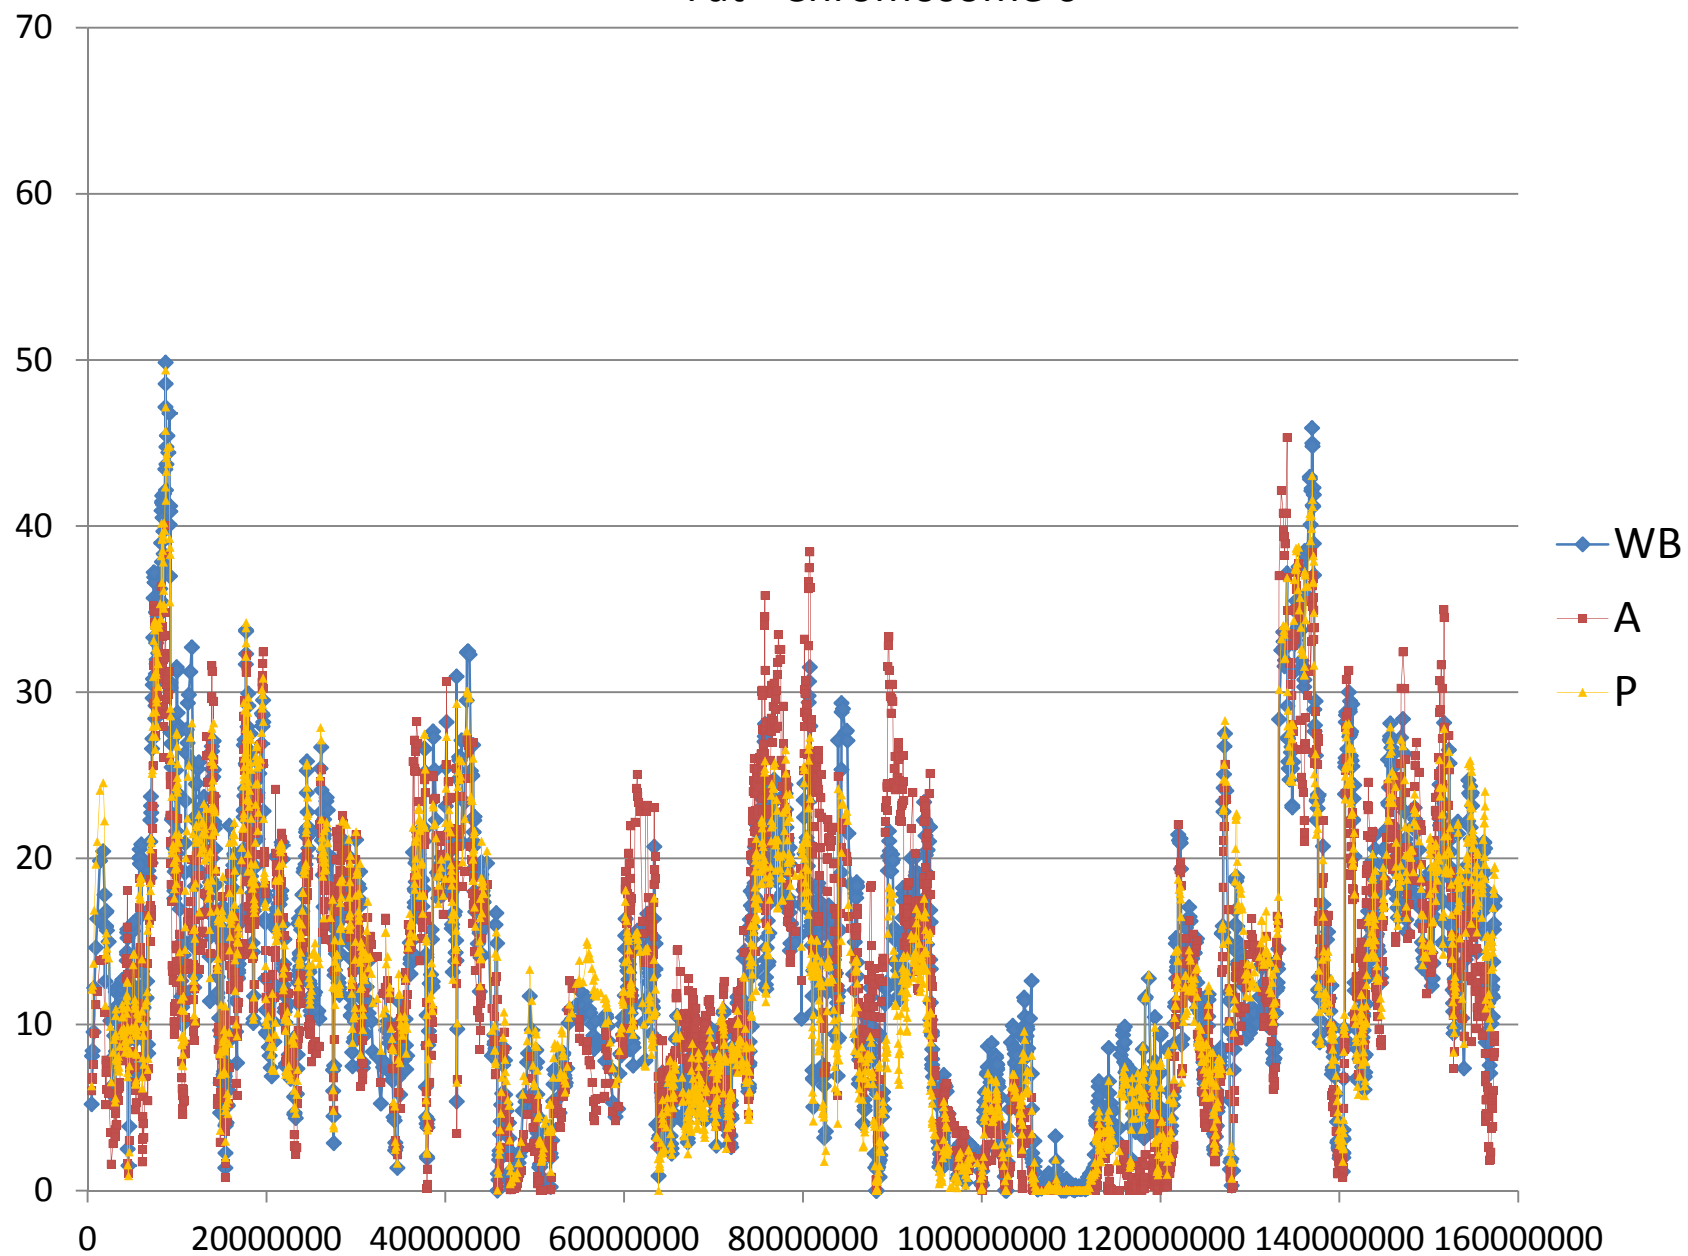

Fat - Chromosome 7

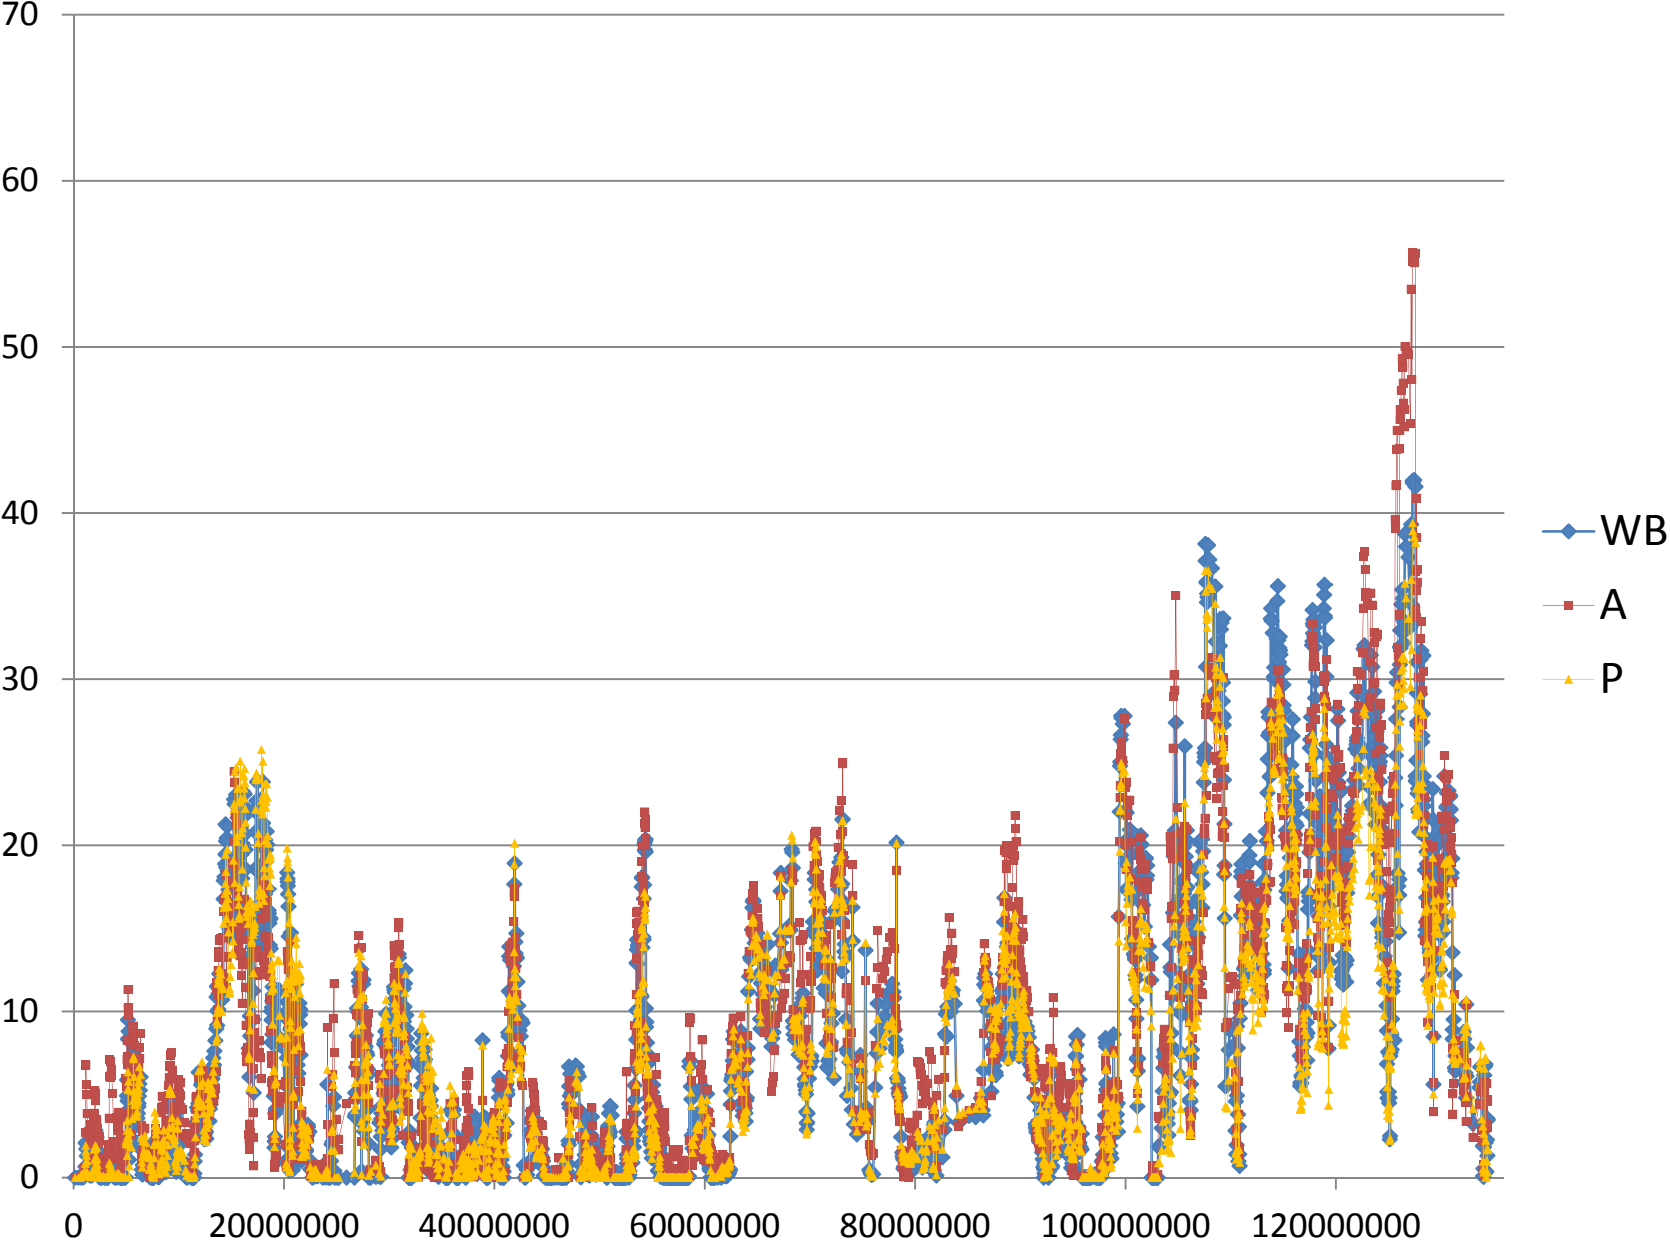

# Fat - Chromosome 8

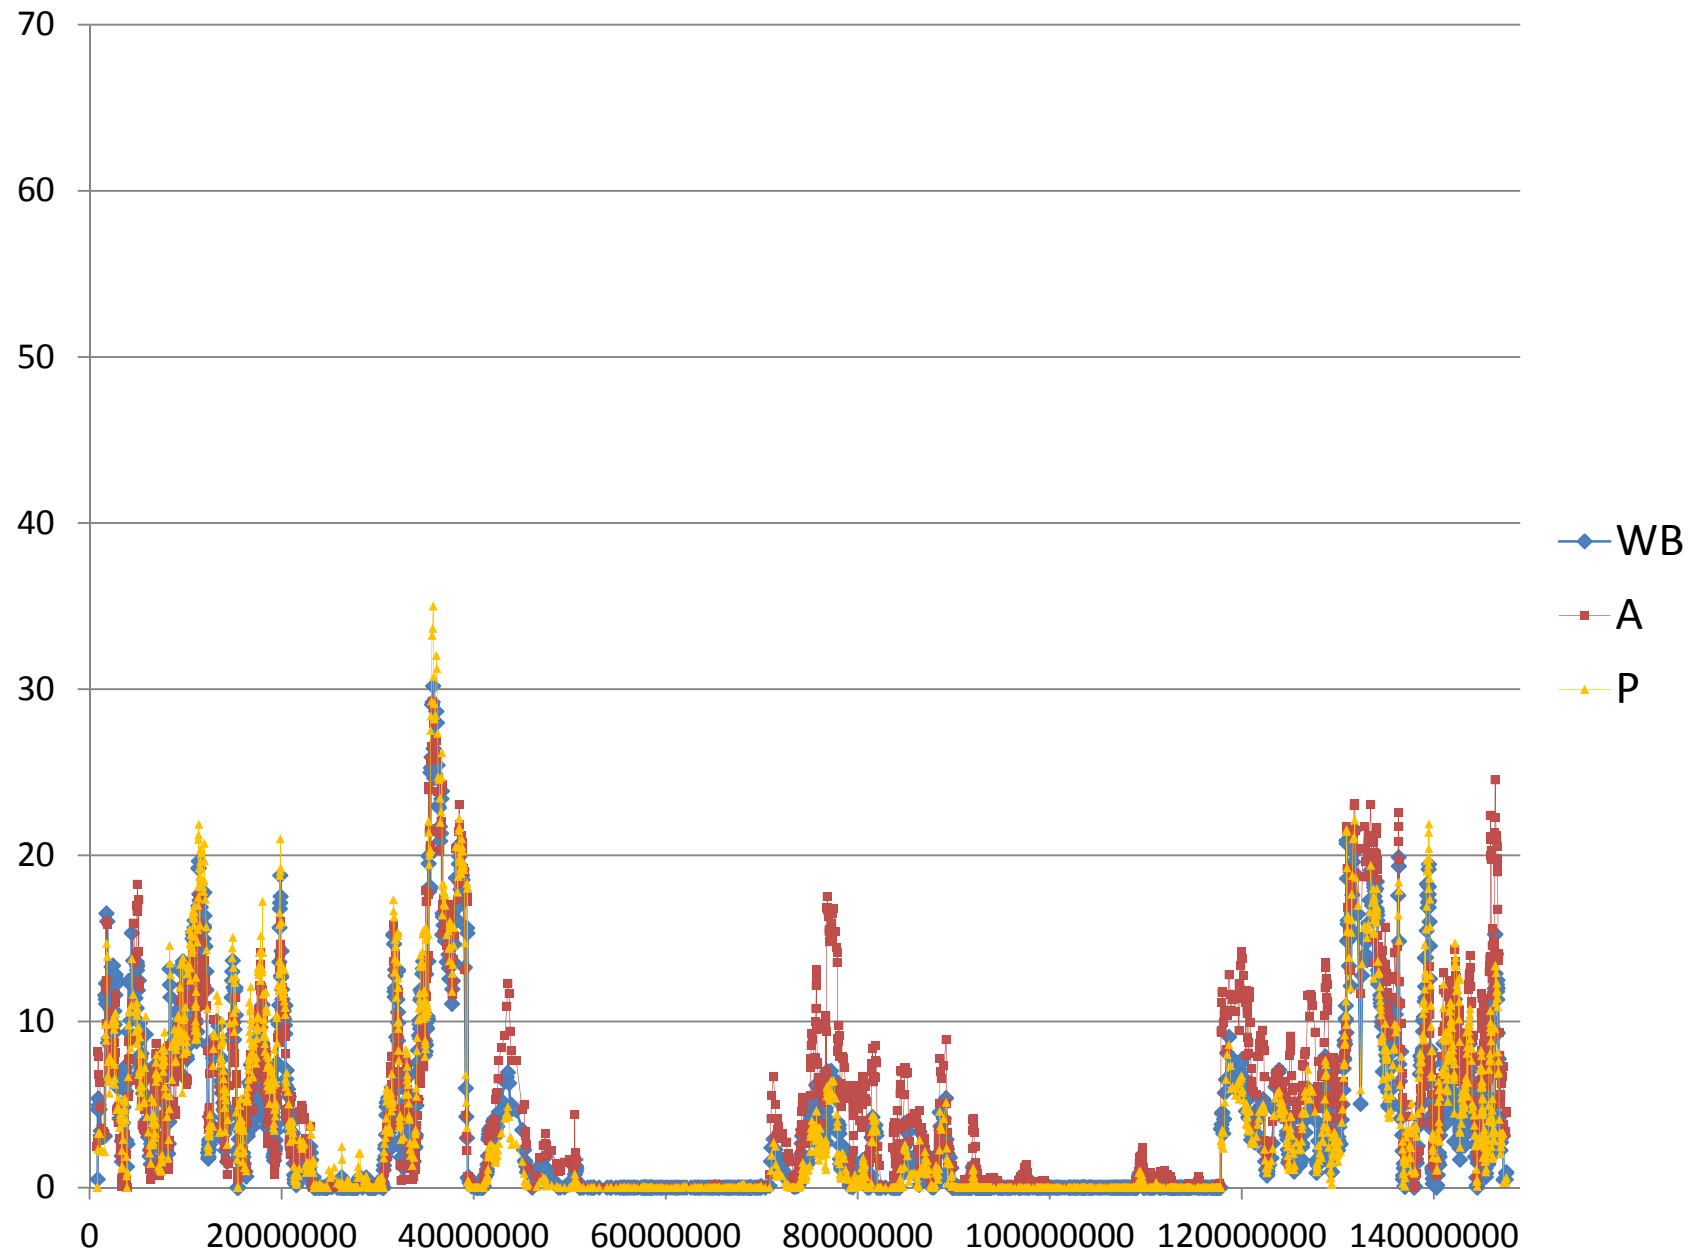



# Fat - Chromosome 9

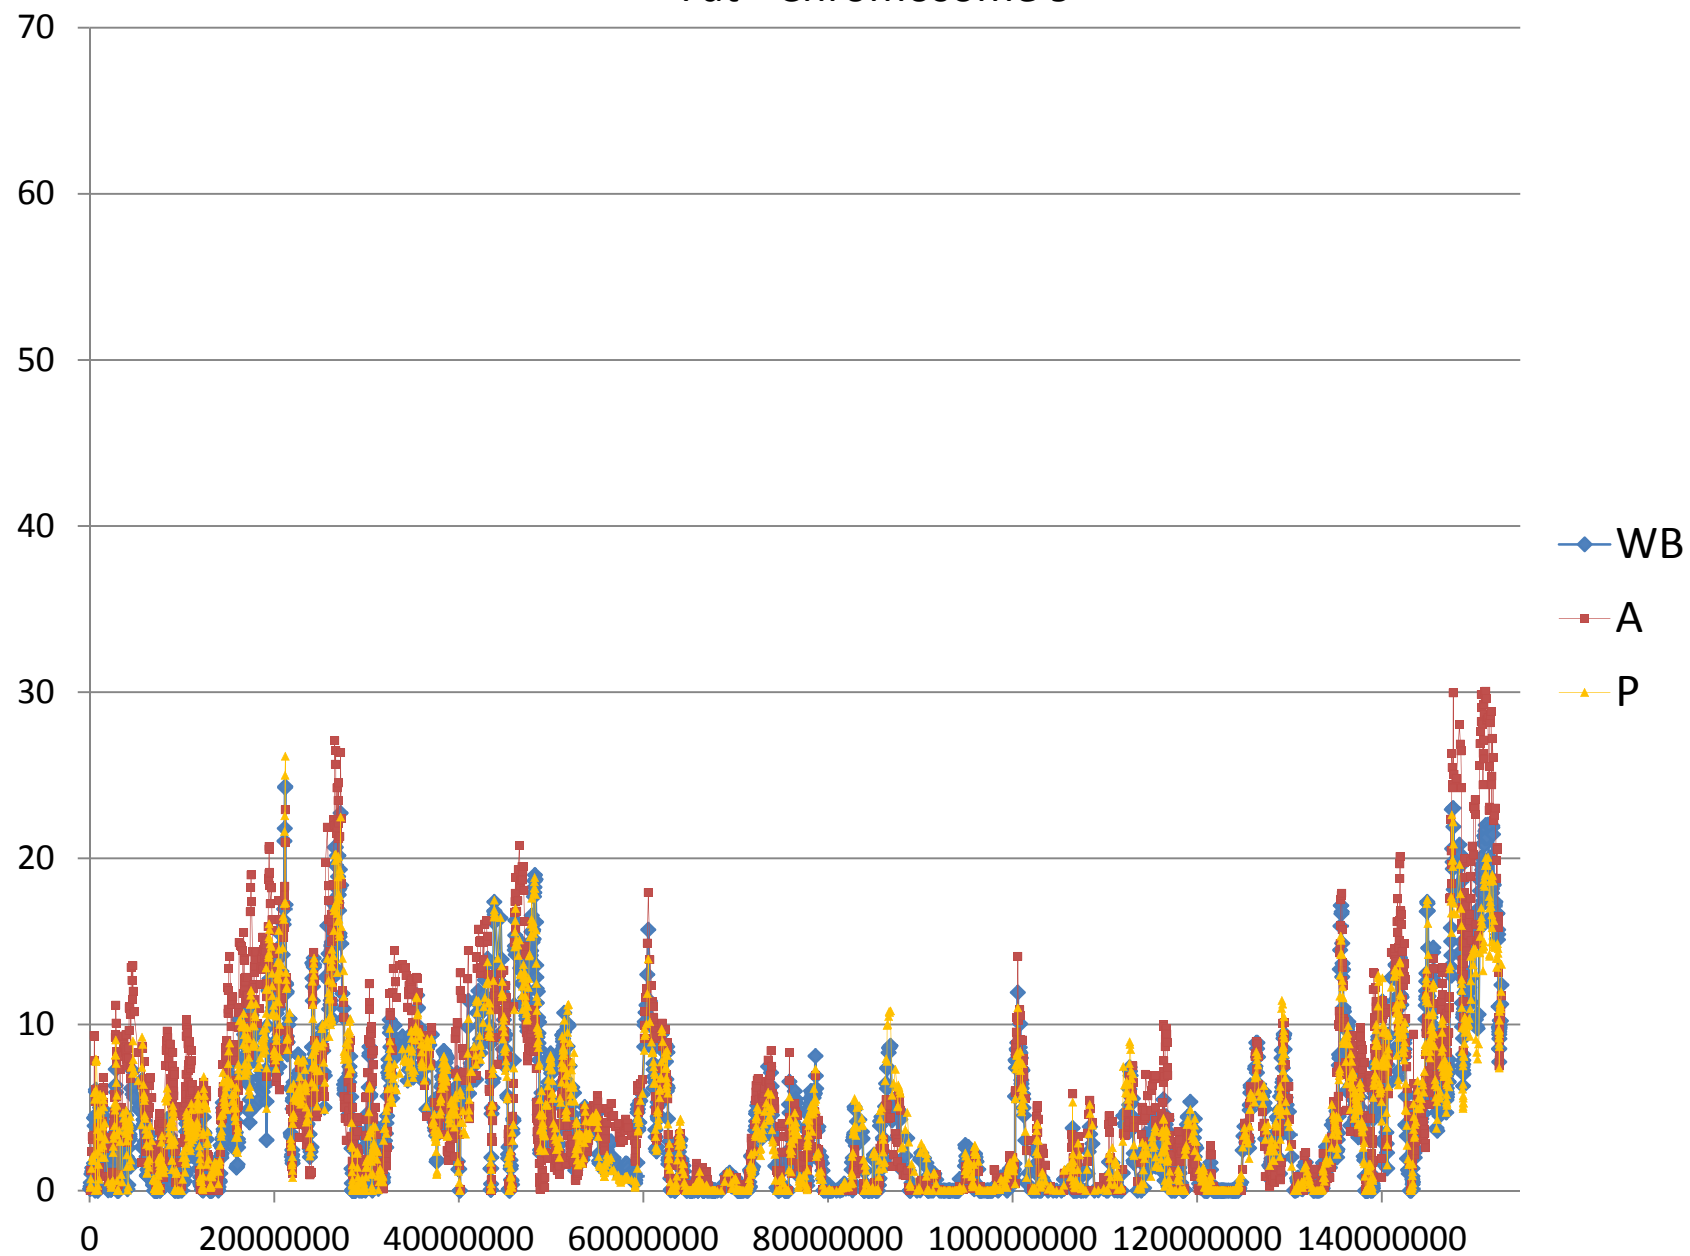

Fat - Chromosome 10

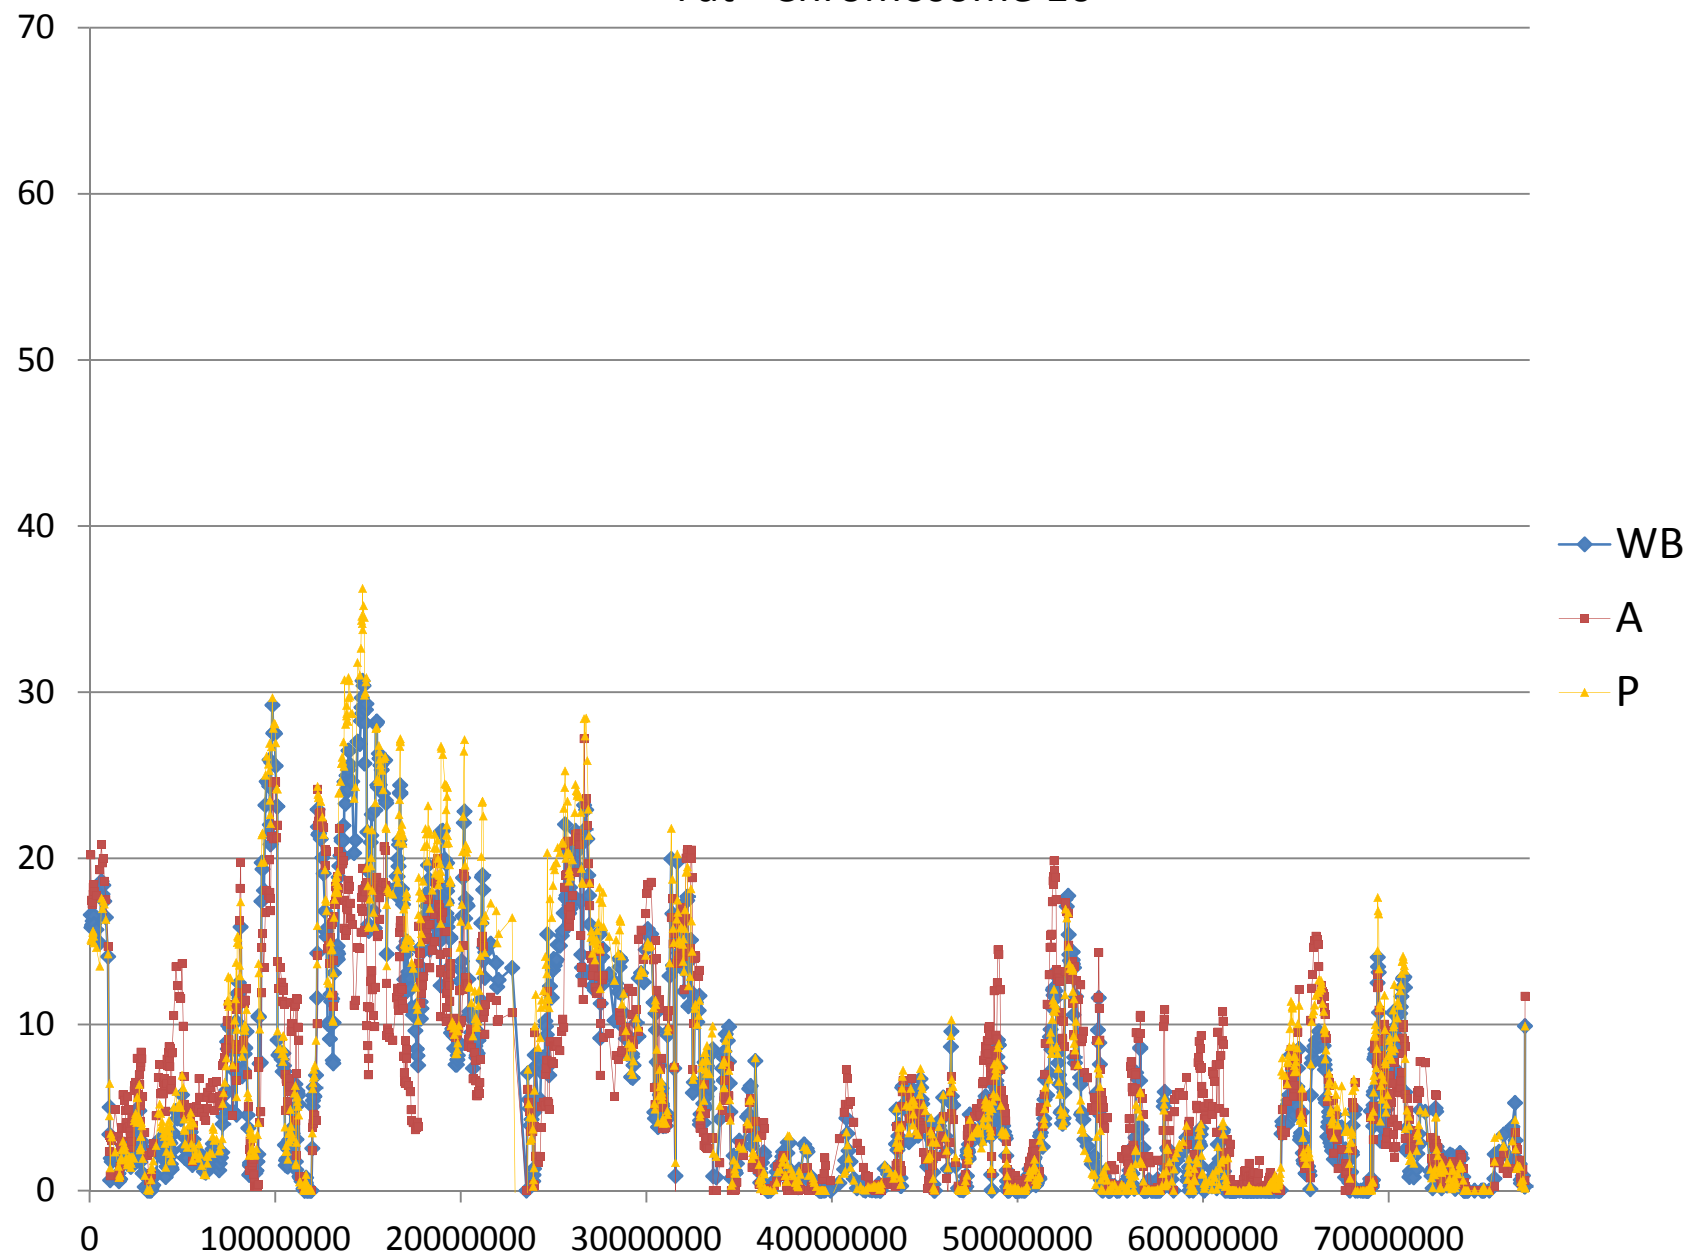

Fat - Chromosome 11

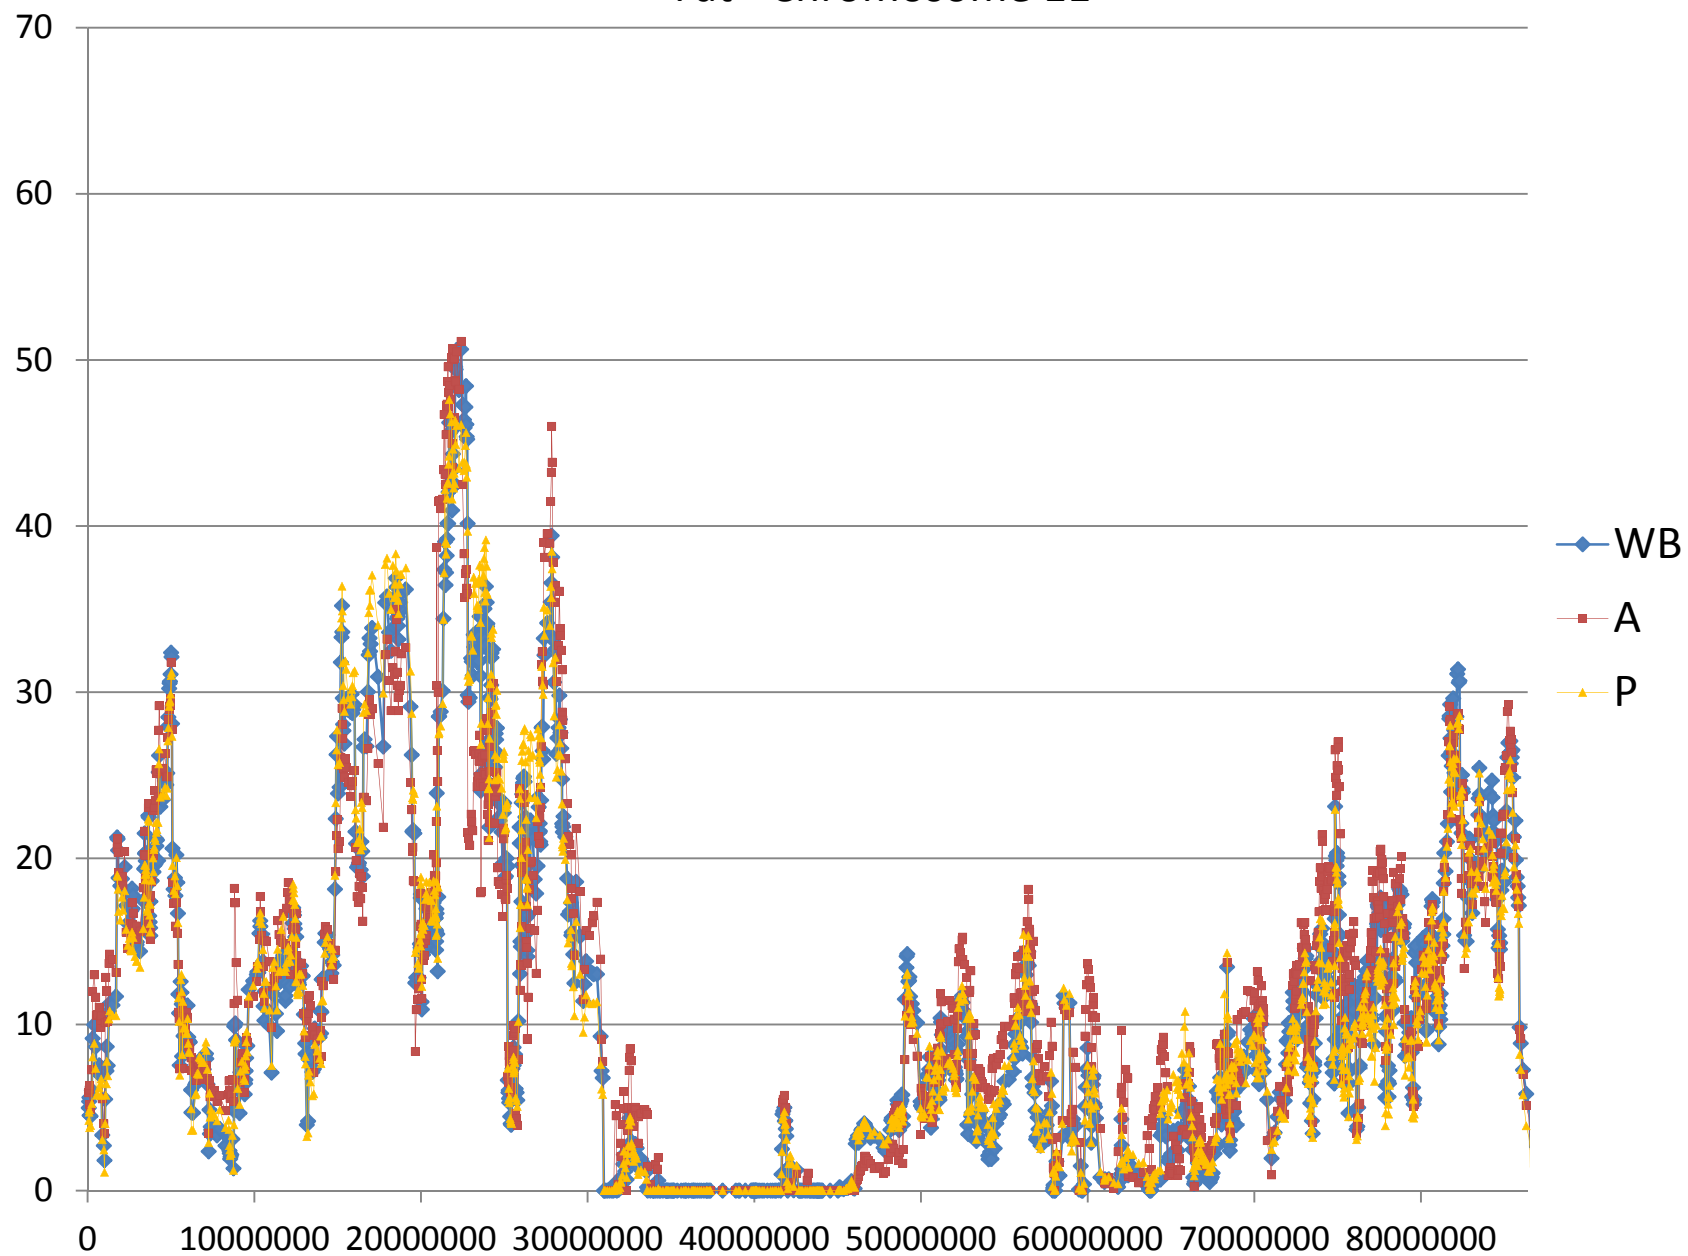

Fat - Chromosome 12

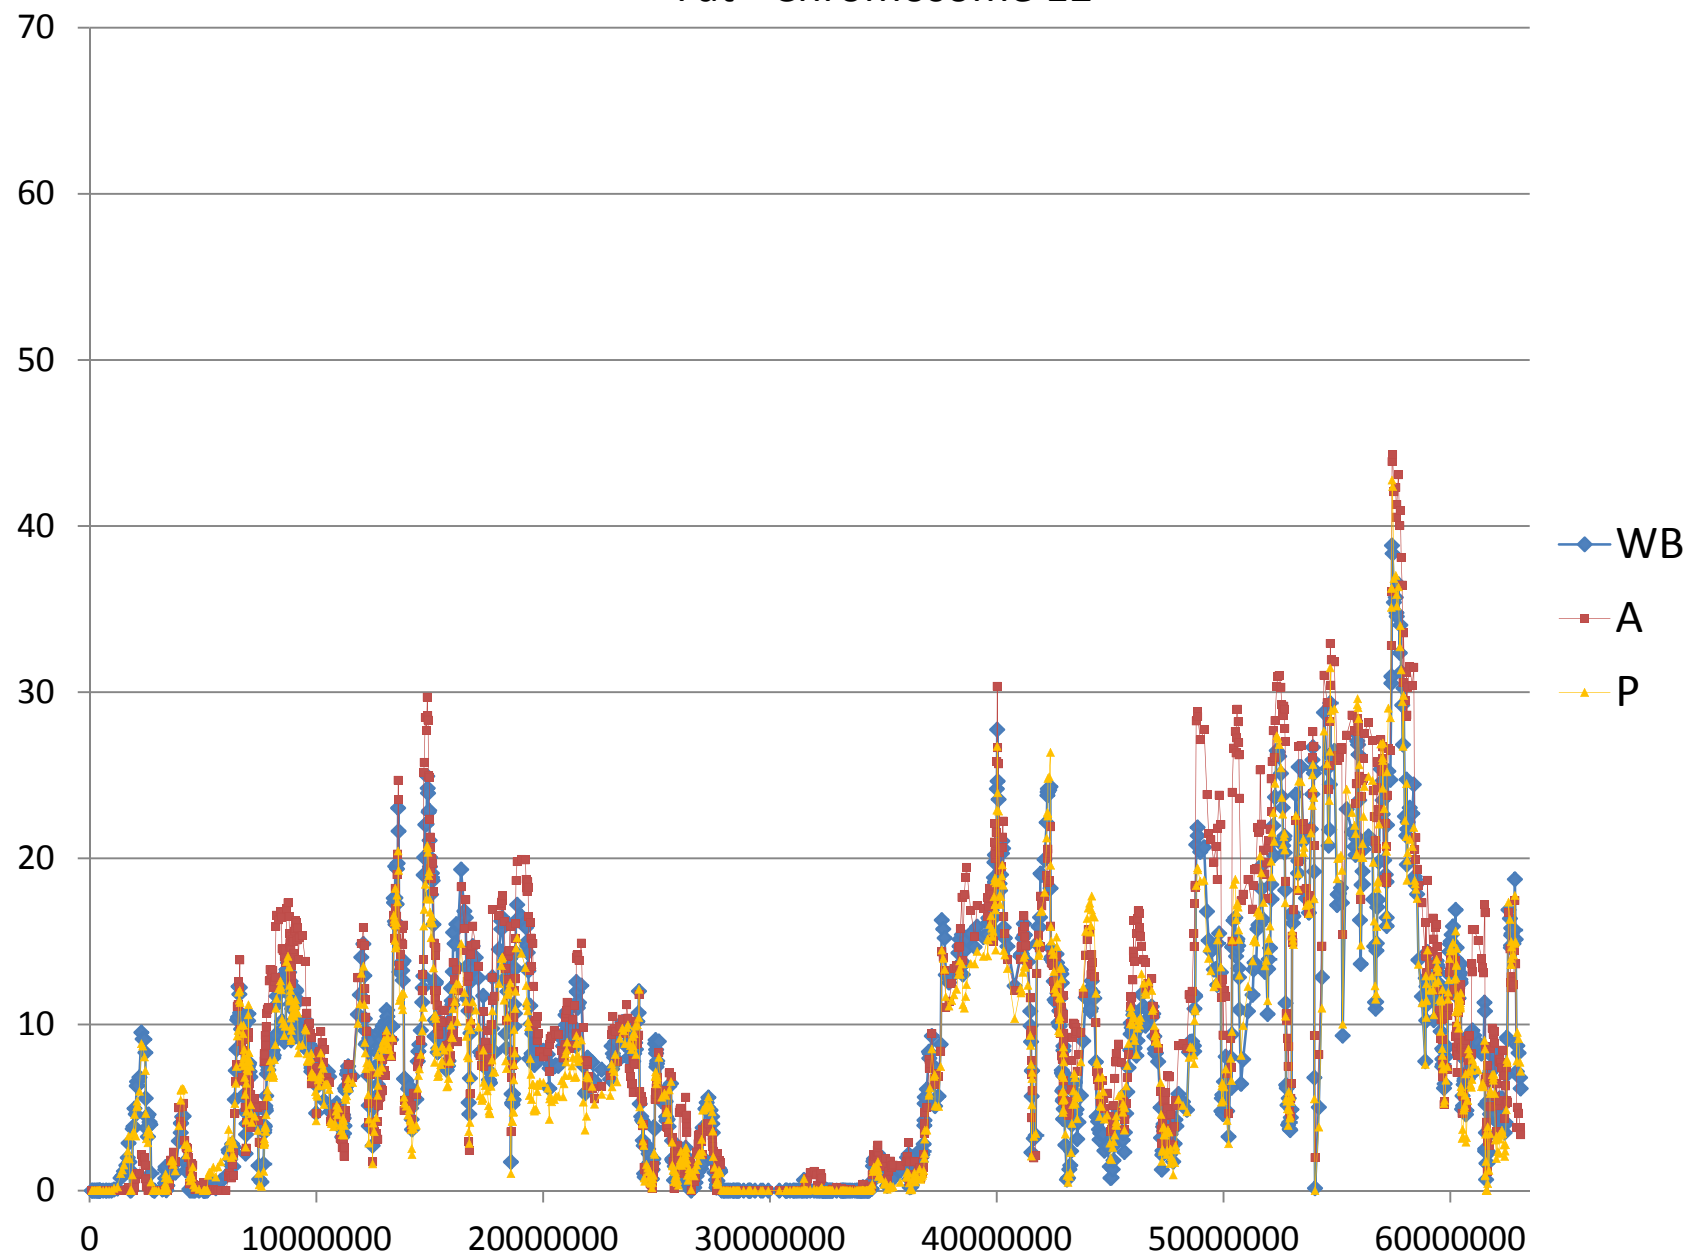

# Fat - Chromosome 13

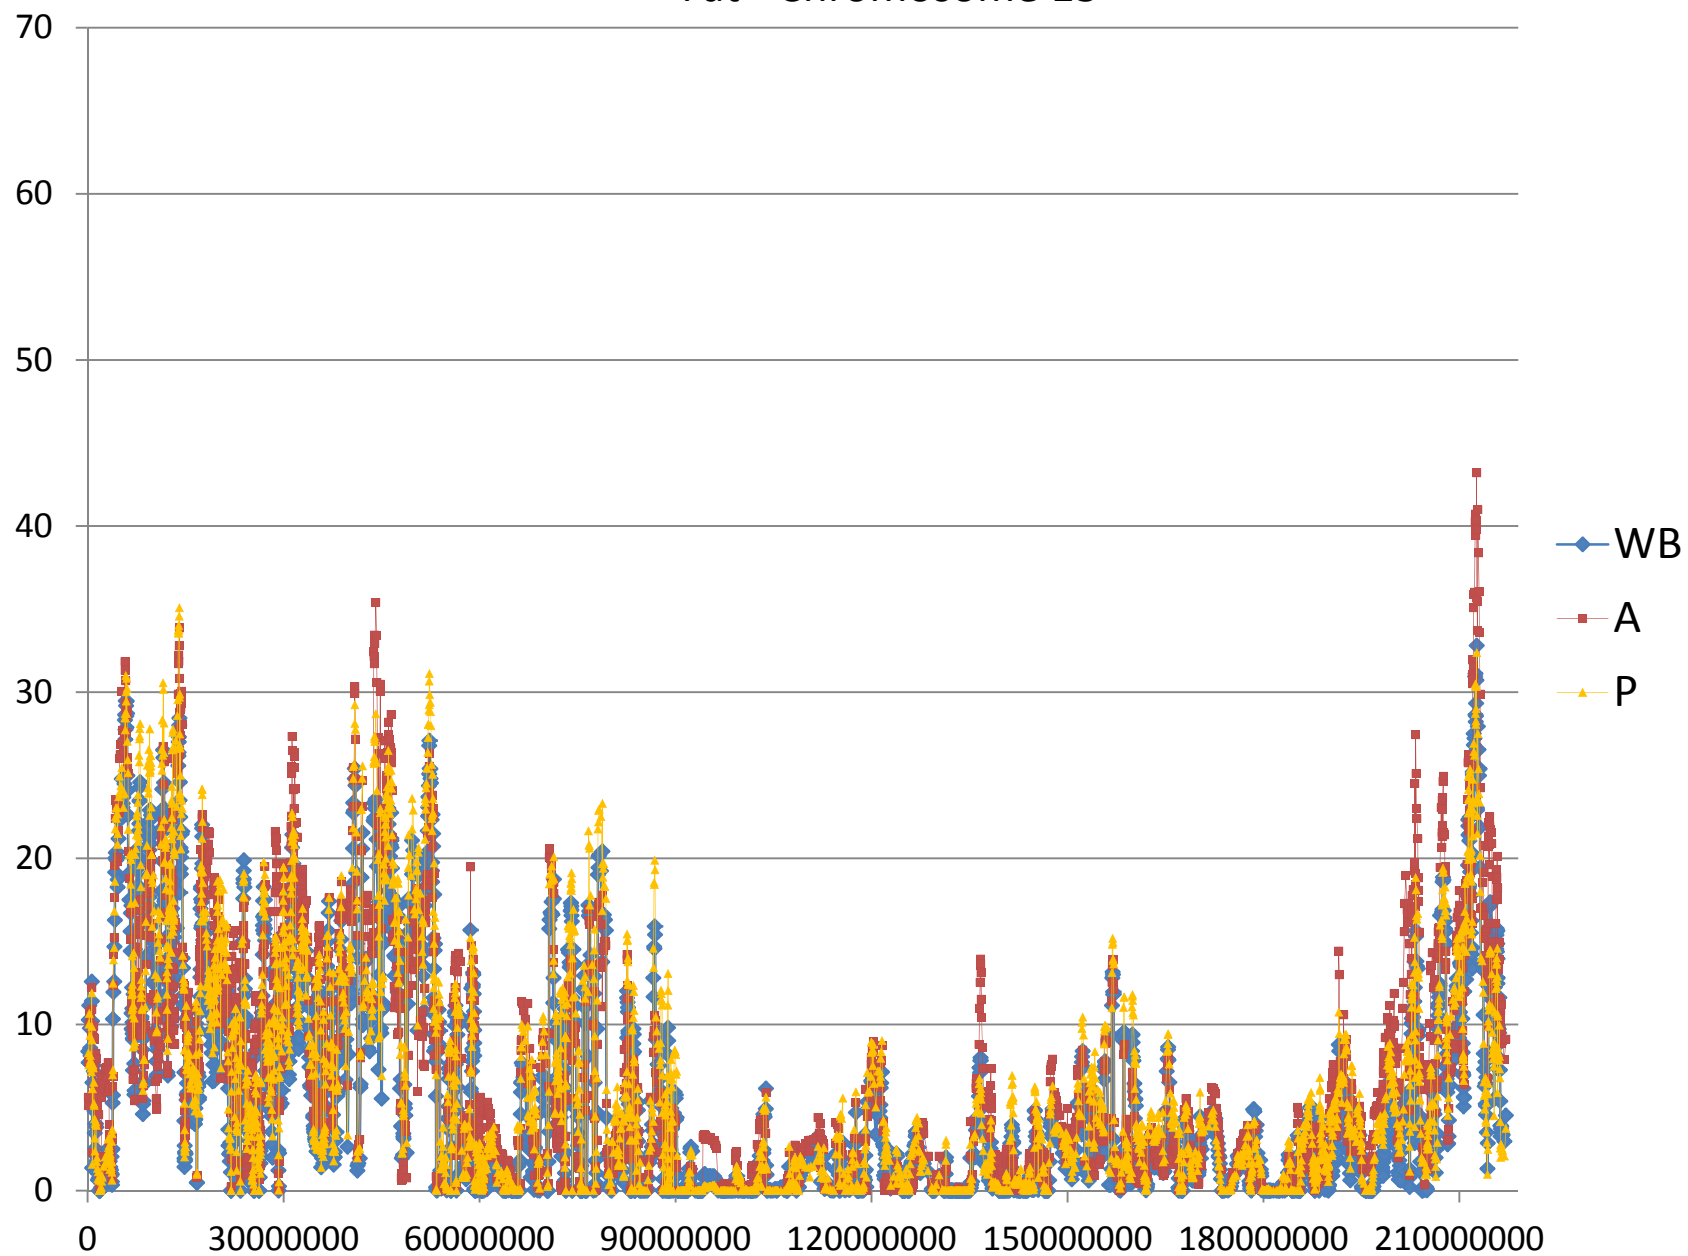

# Fat - Chromosome 14

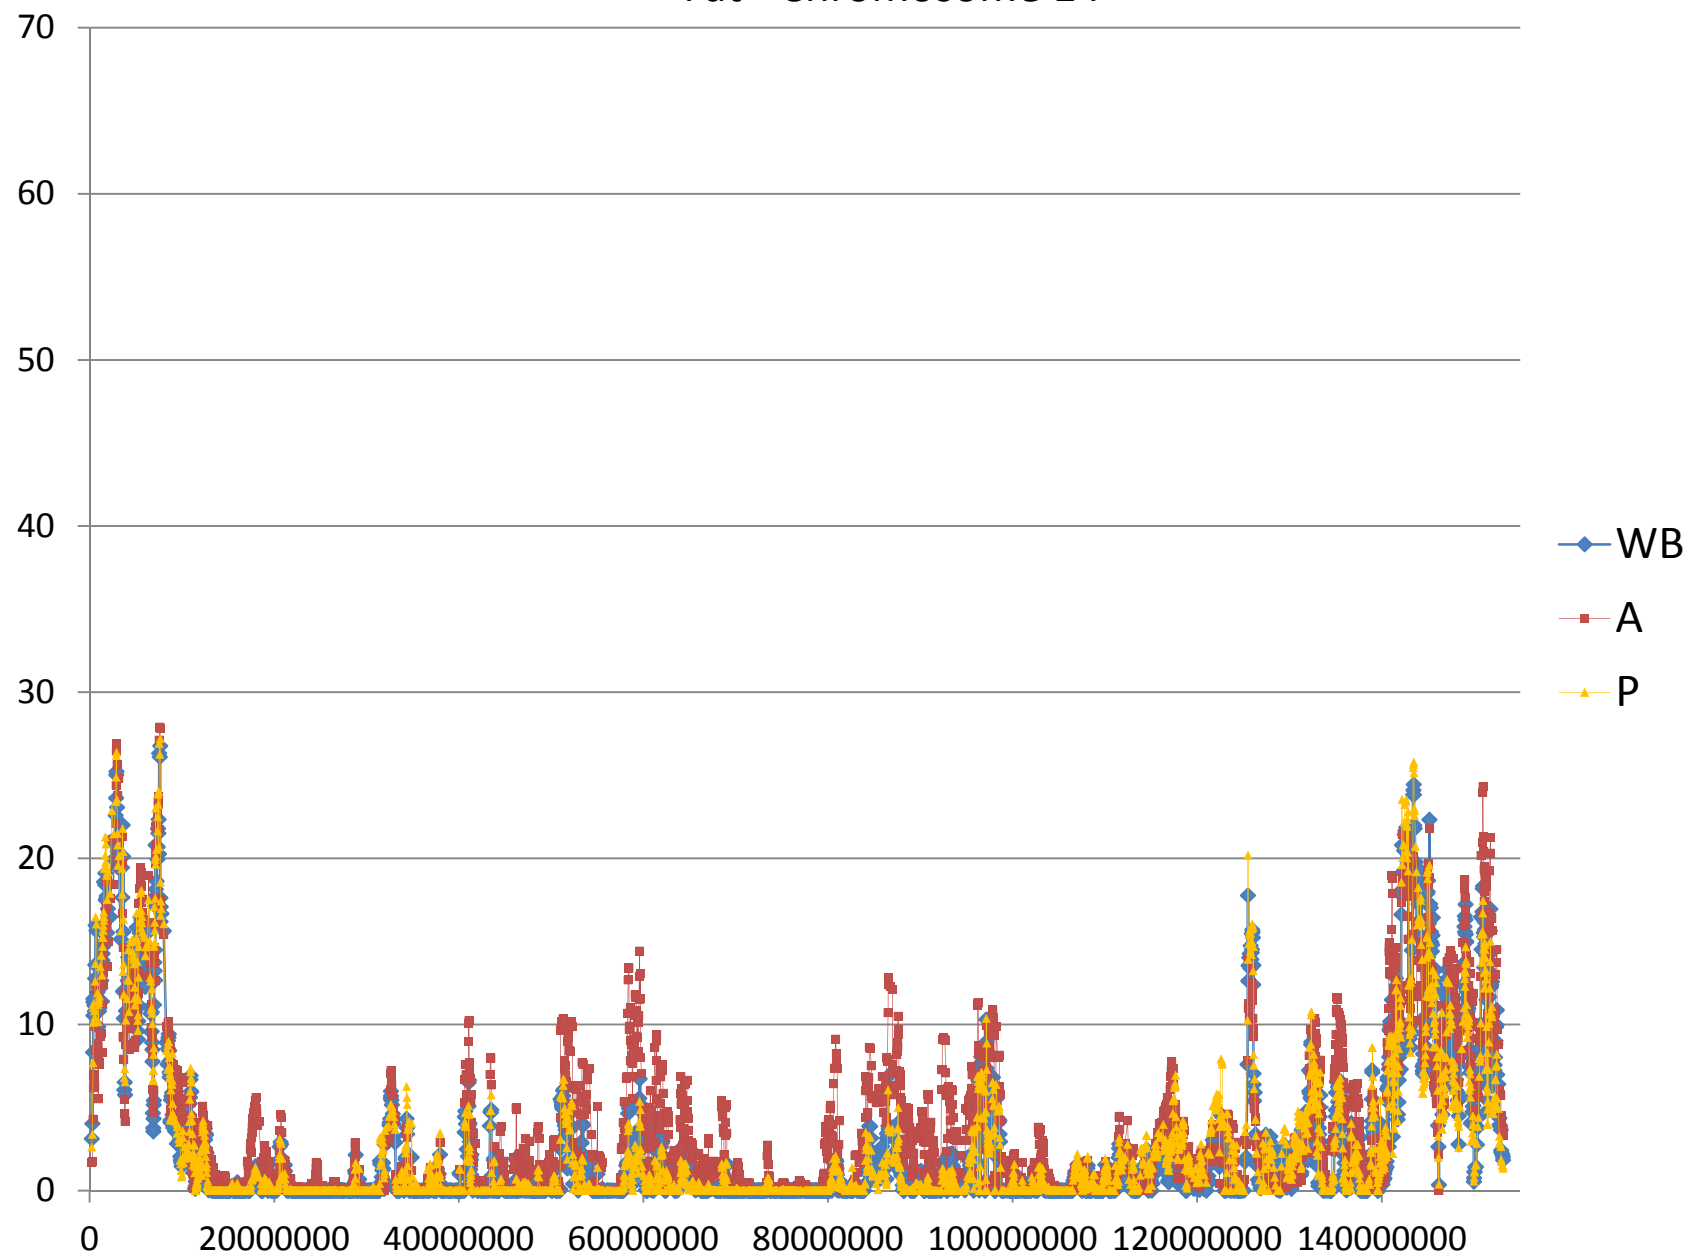

Fat - Chromosome 15

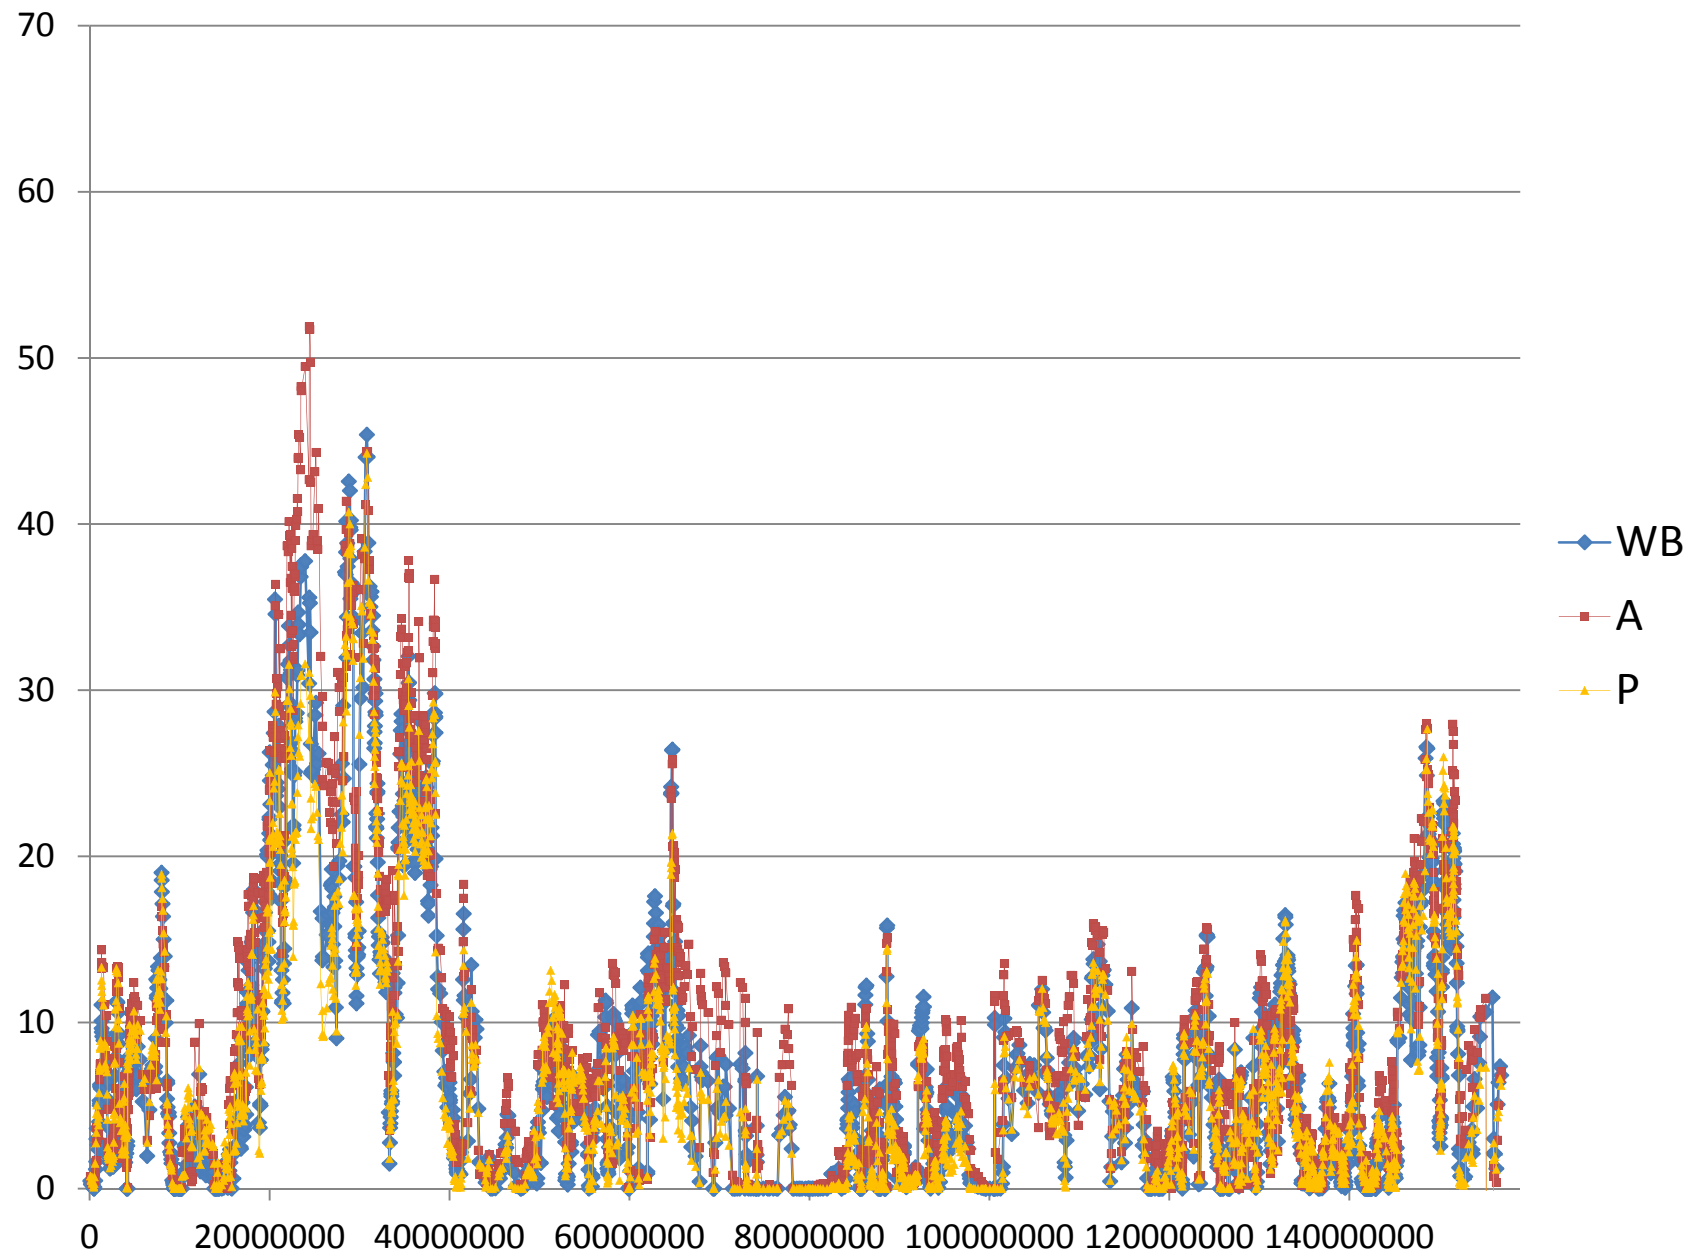

Fat - Chromosome 16

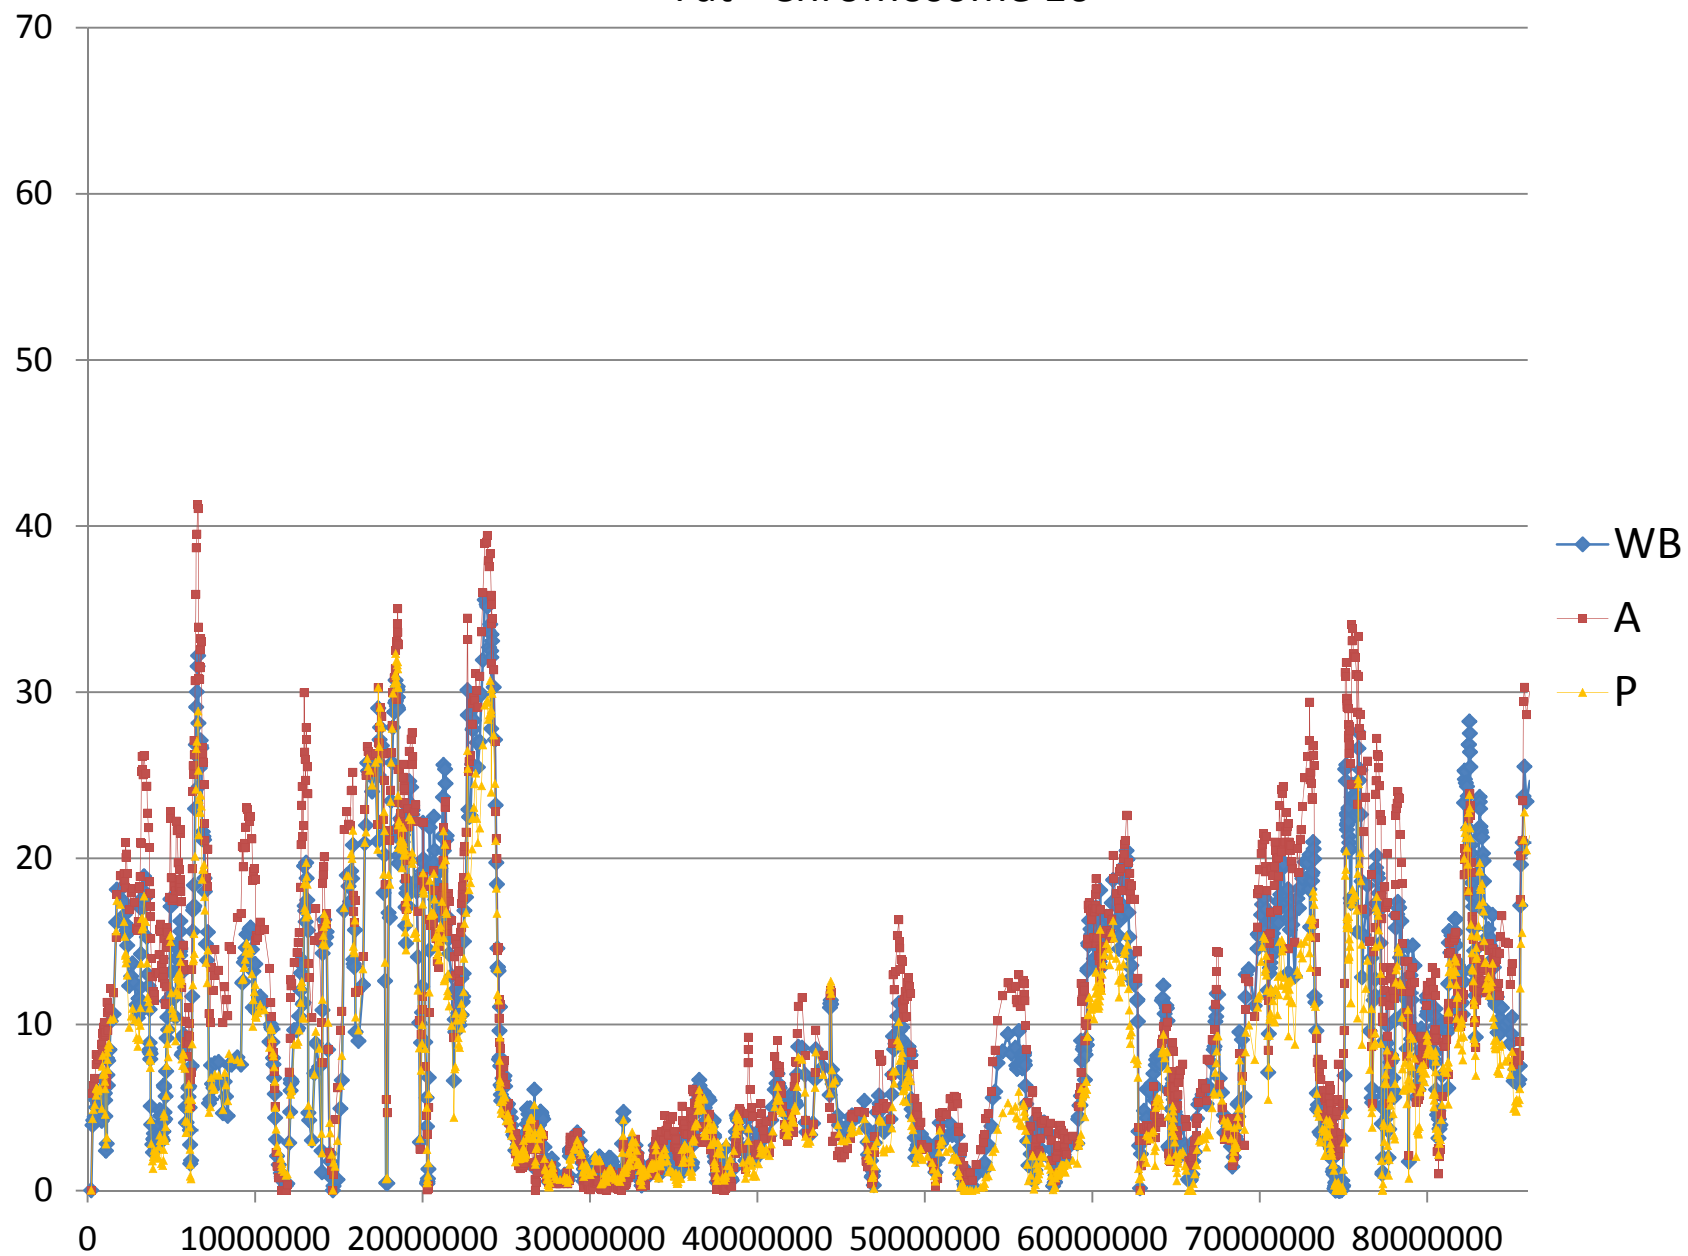



Fat - Chromosome 17

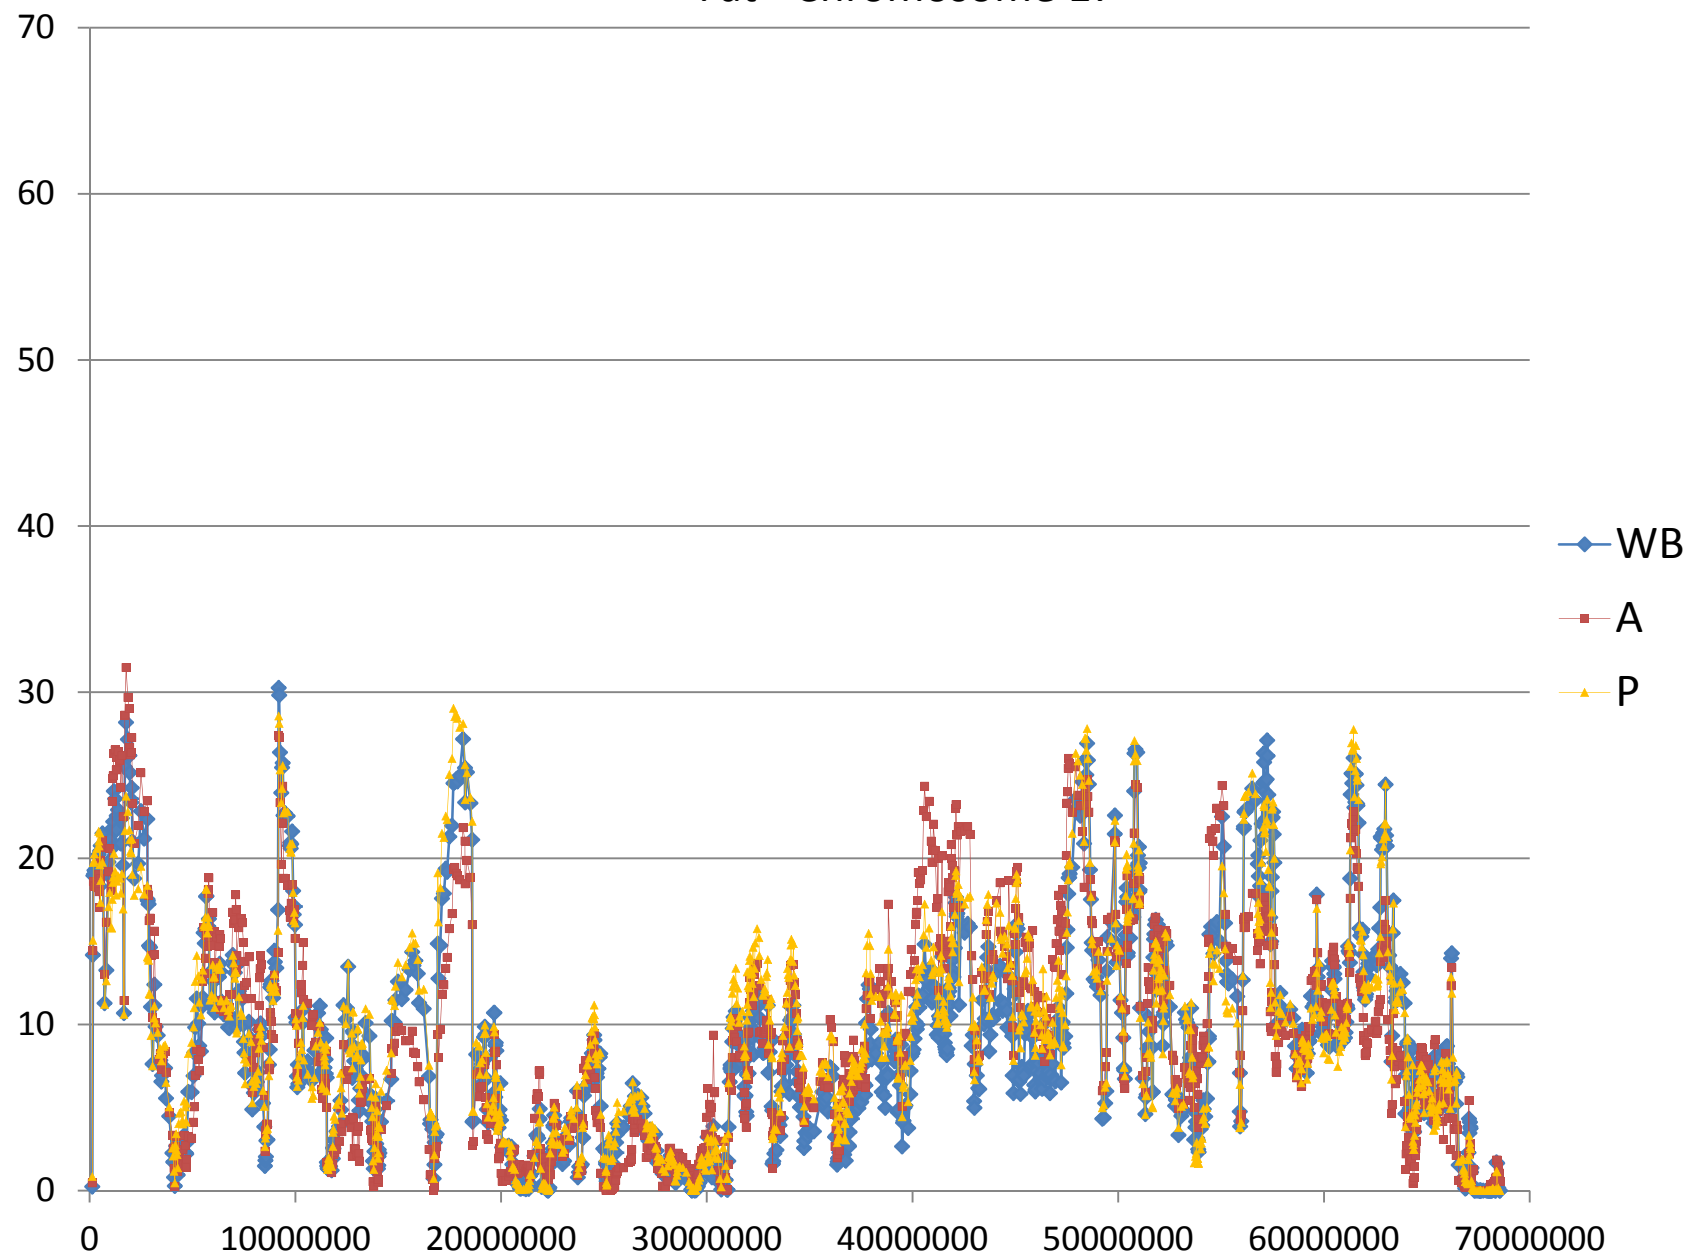

Fat - Chromosome 18

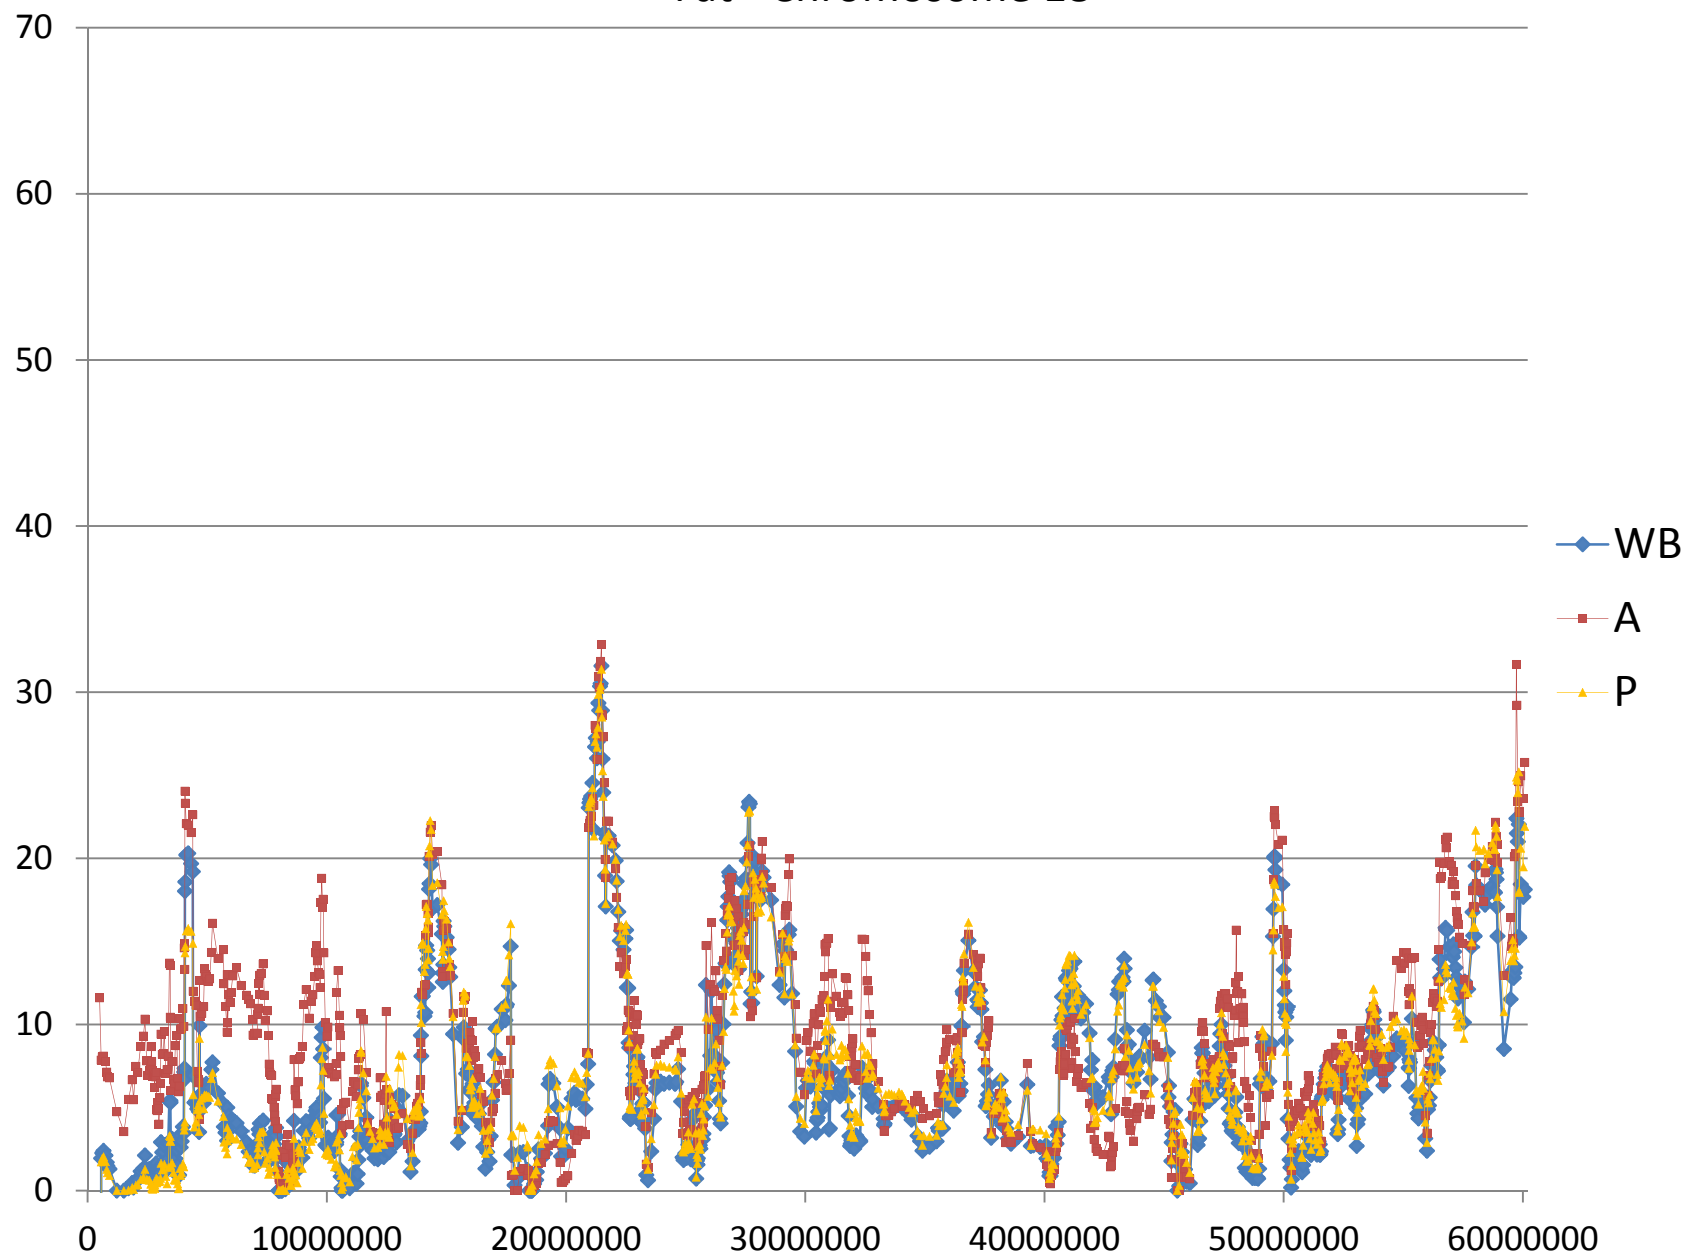

Supplement: Supplementary file 5 [file aab-60-51-2017-supplement.zip]
