# Supplementary material for: Genome-wide QTL mapping results for regional DXA body composition and bone mineral density traits in pigs
Source: Copernicus journal article supplement (doi:10.5194/aab-60-51-2017), 2017-04-05

# R - Chromosome 1

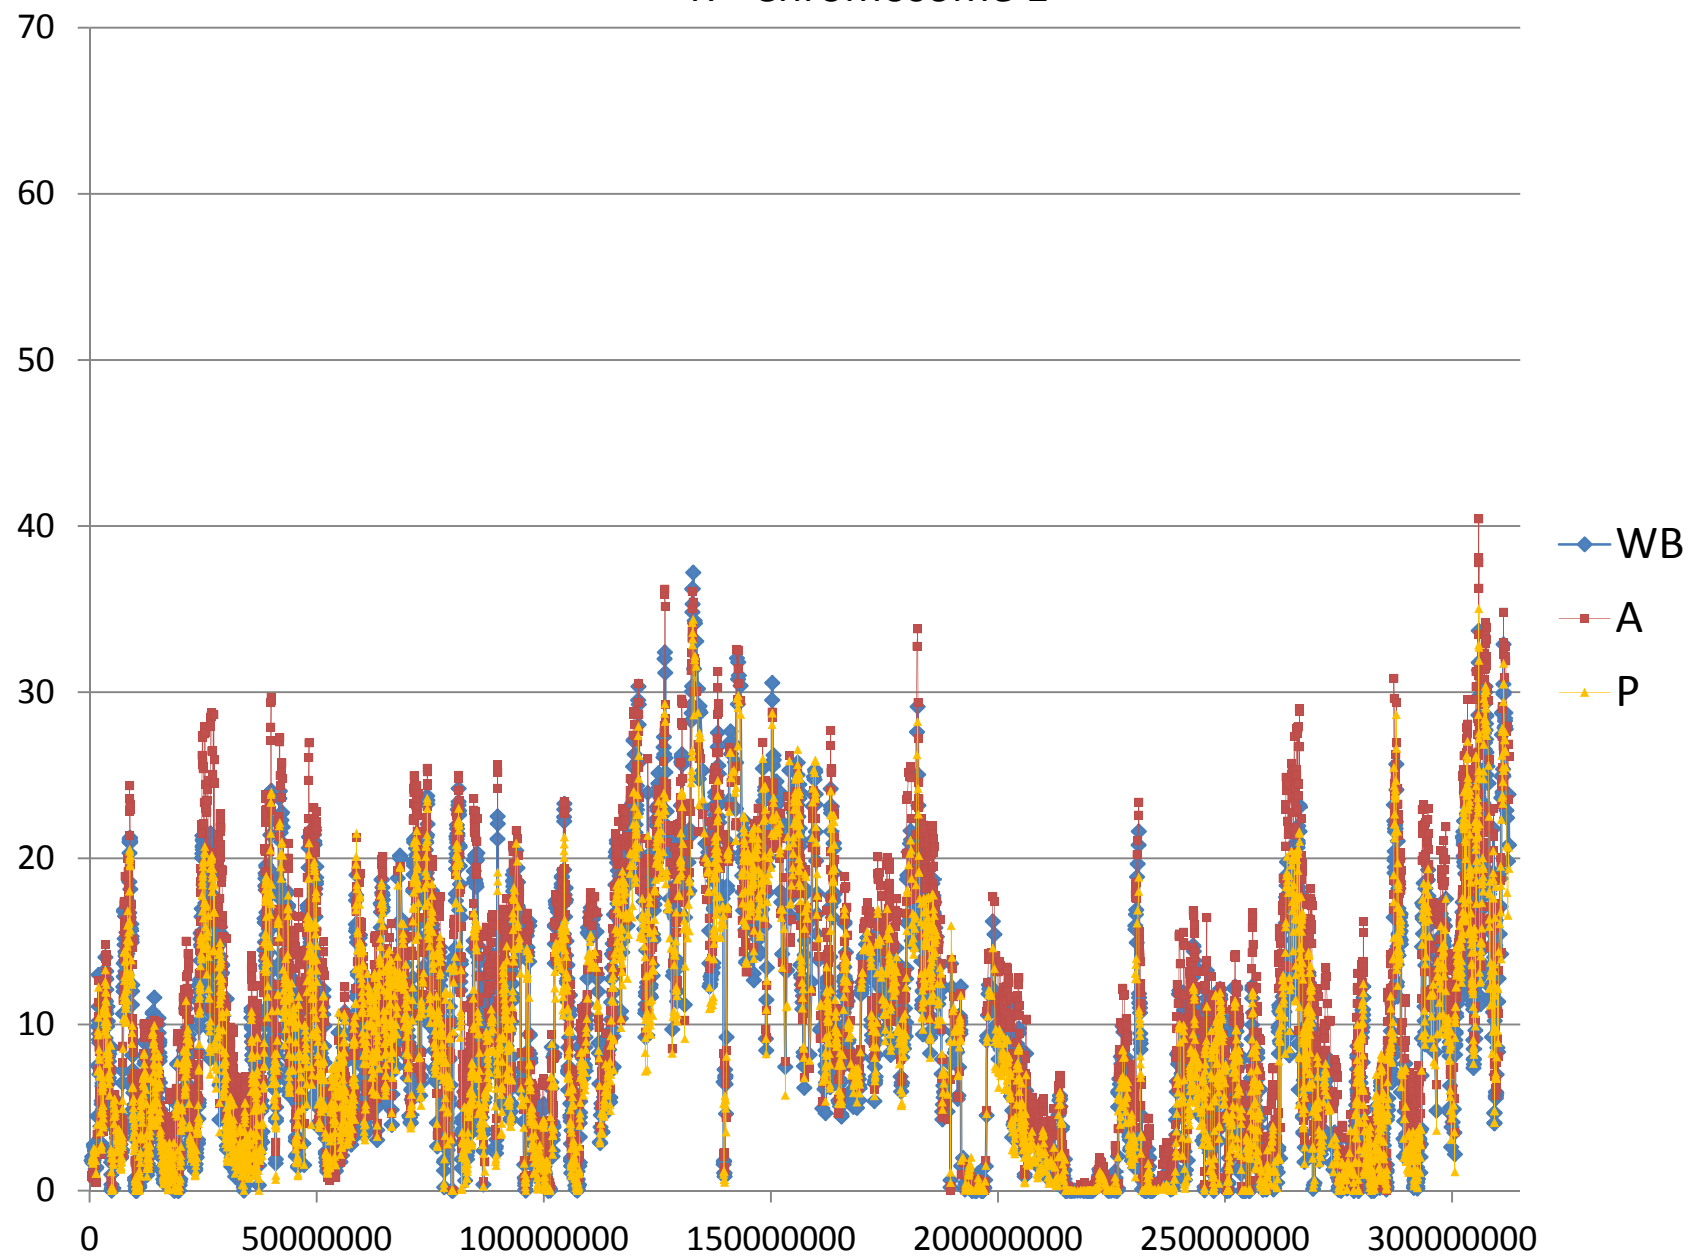

# R - Chromosome 2

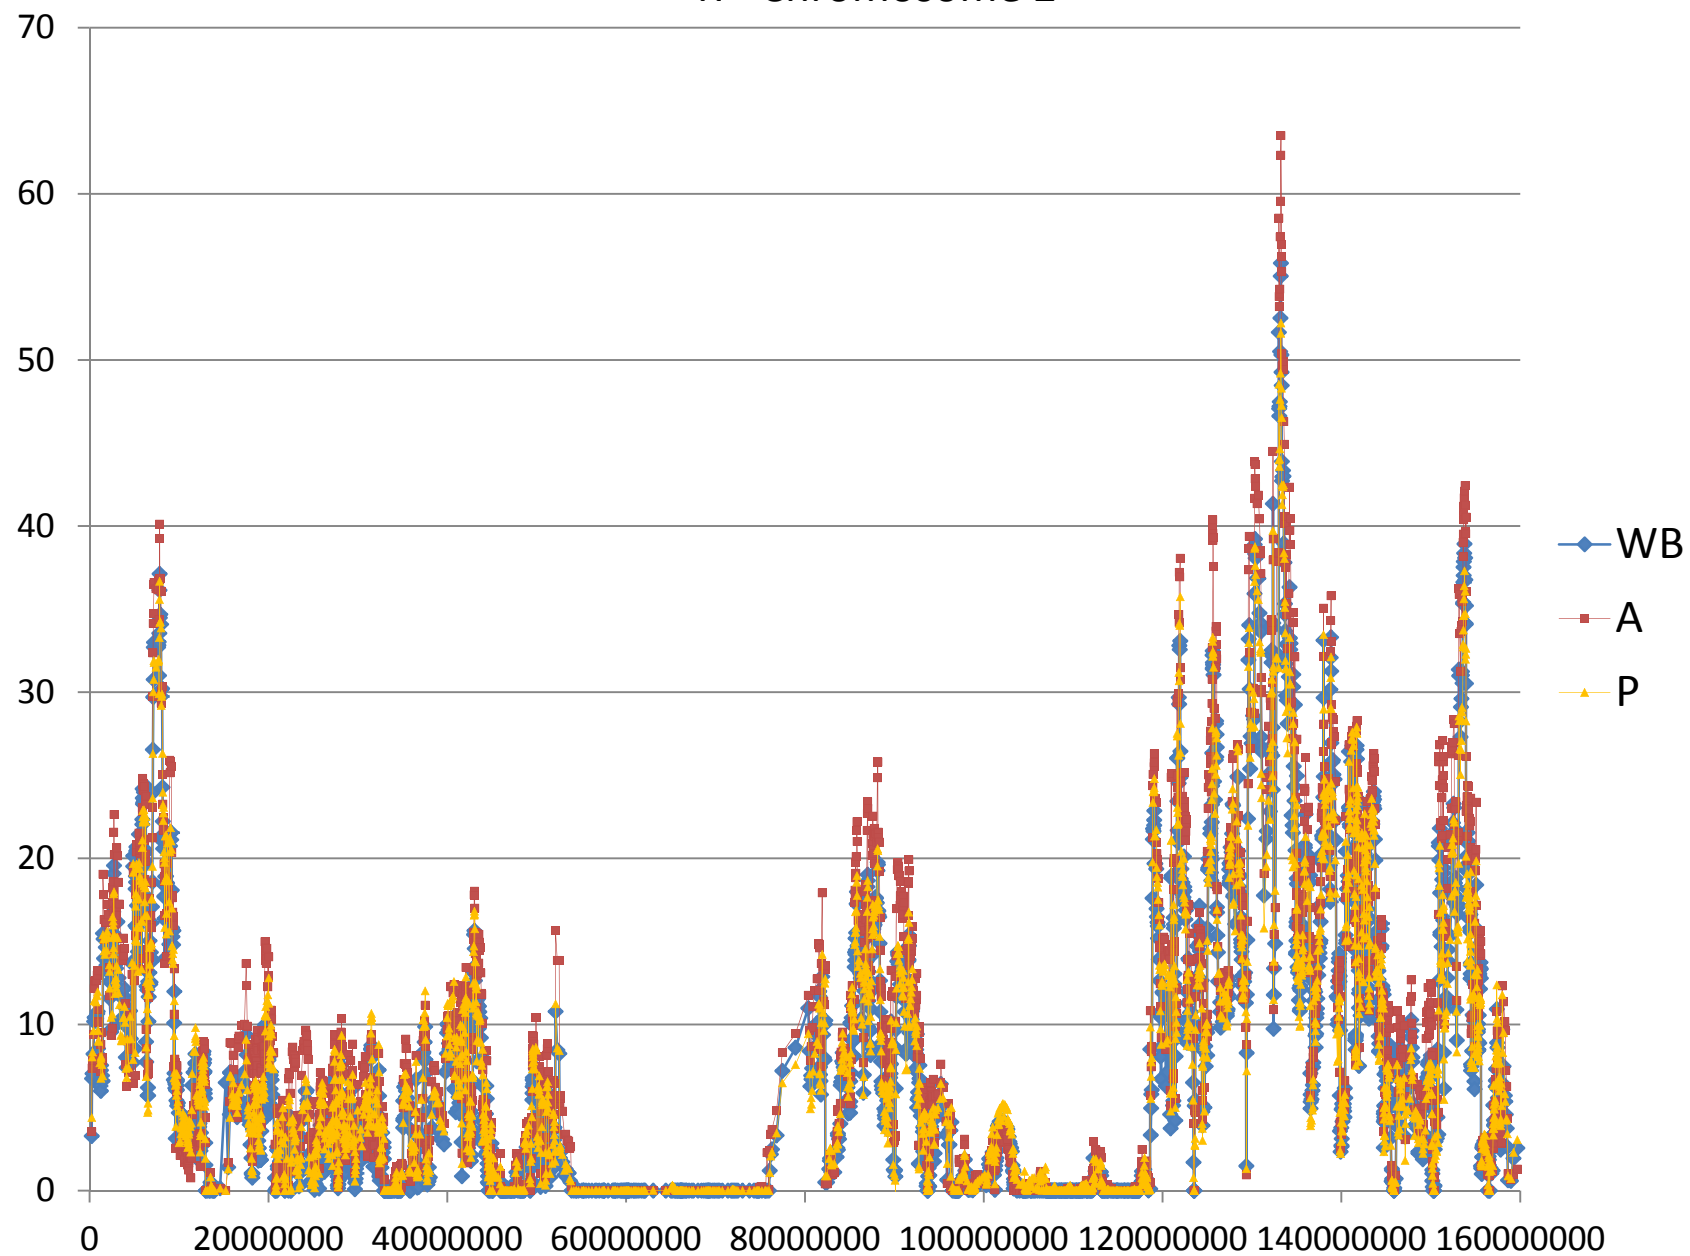

# R - Chromosome 3

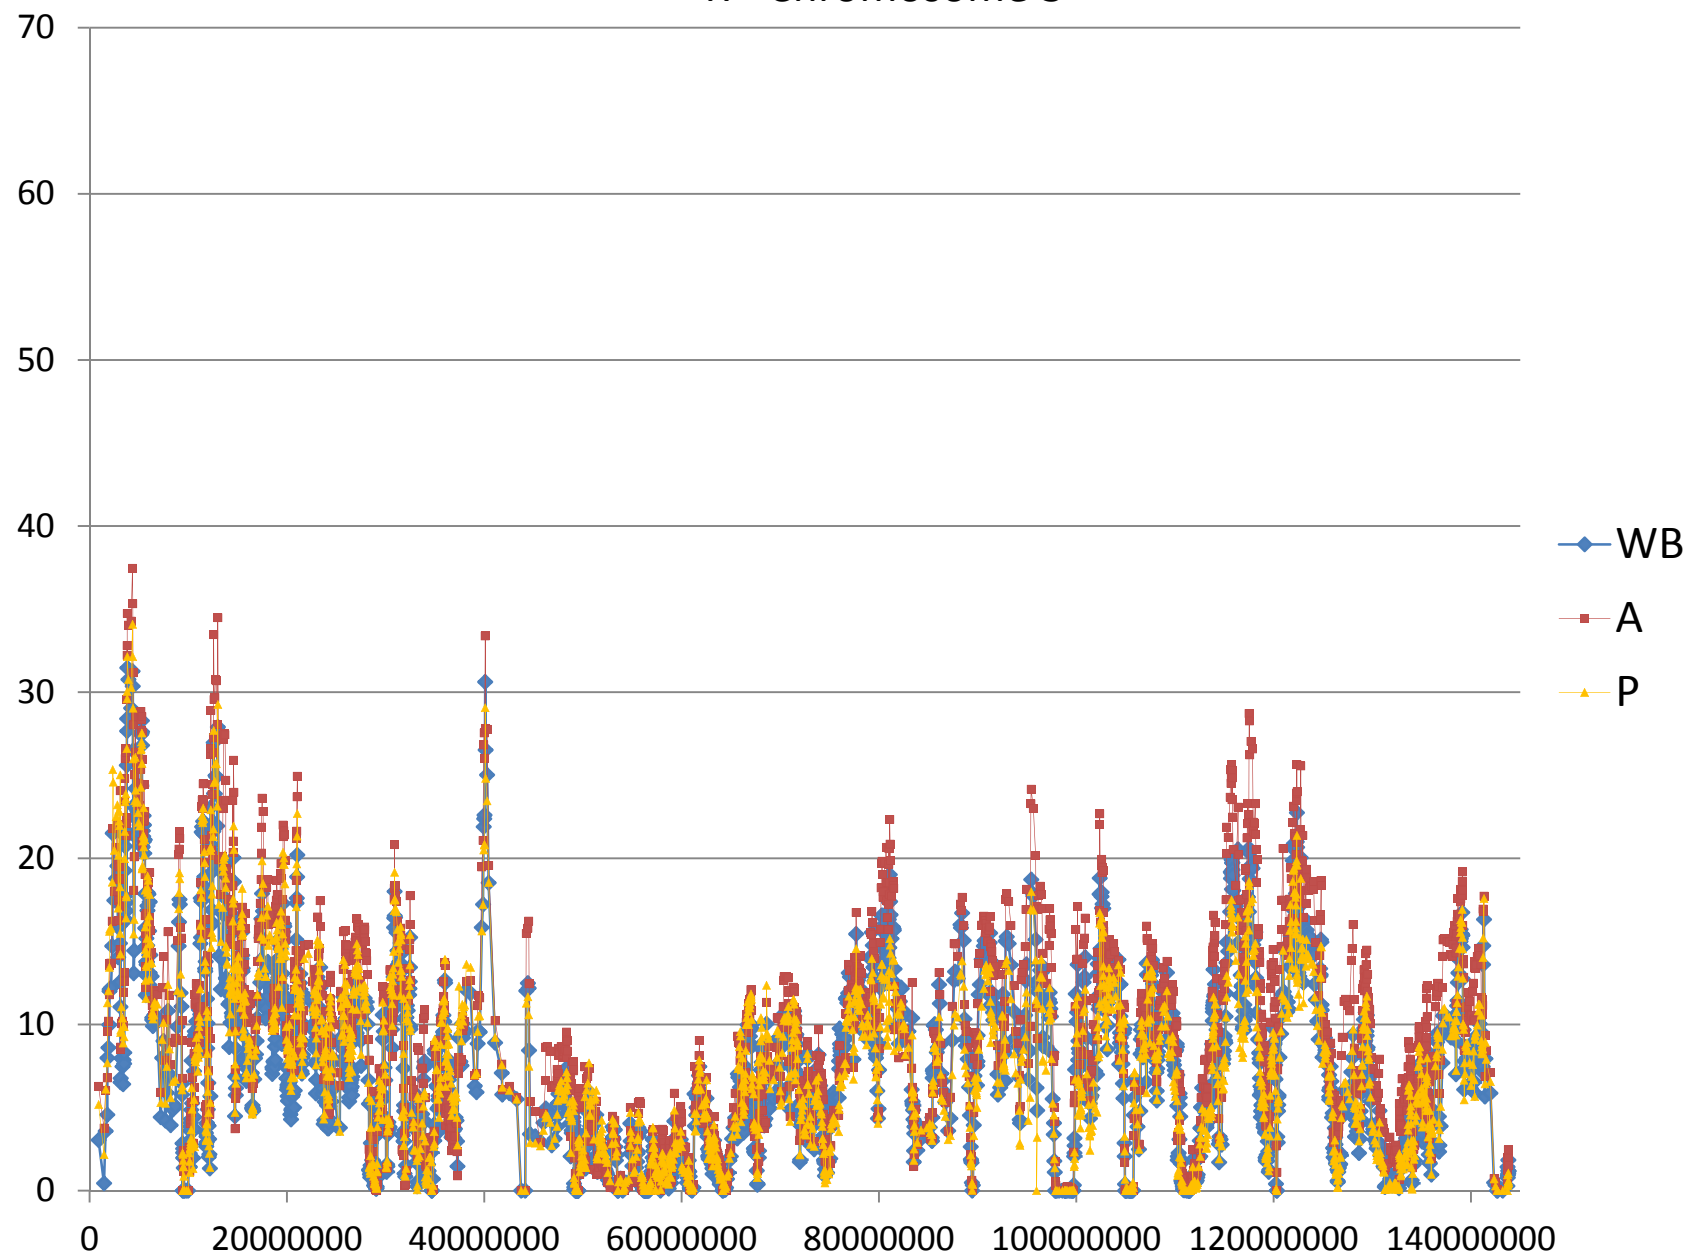

# R - Chromosome 4

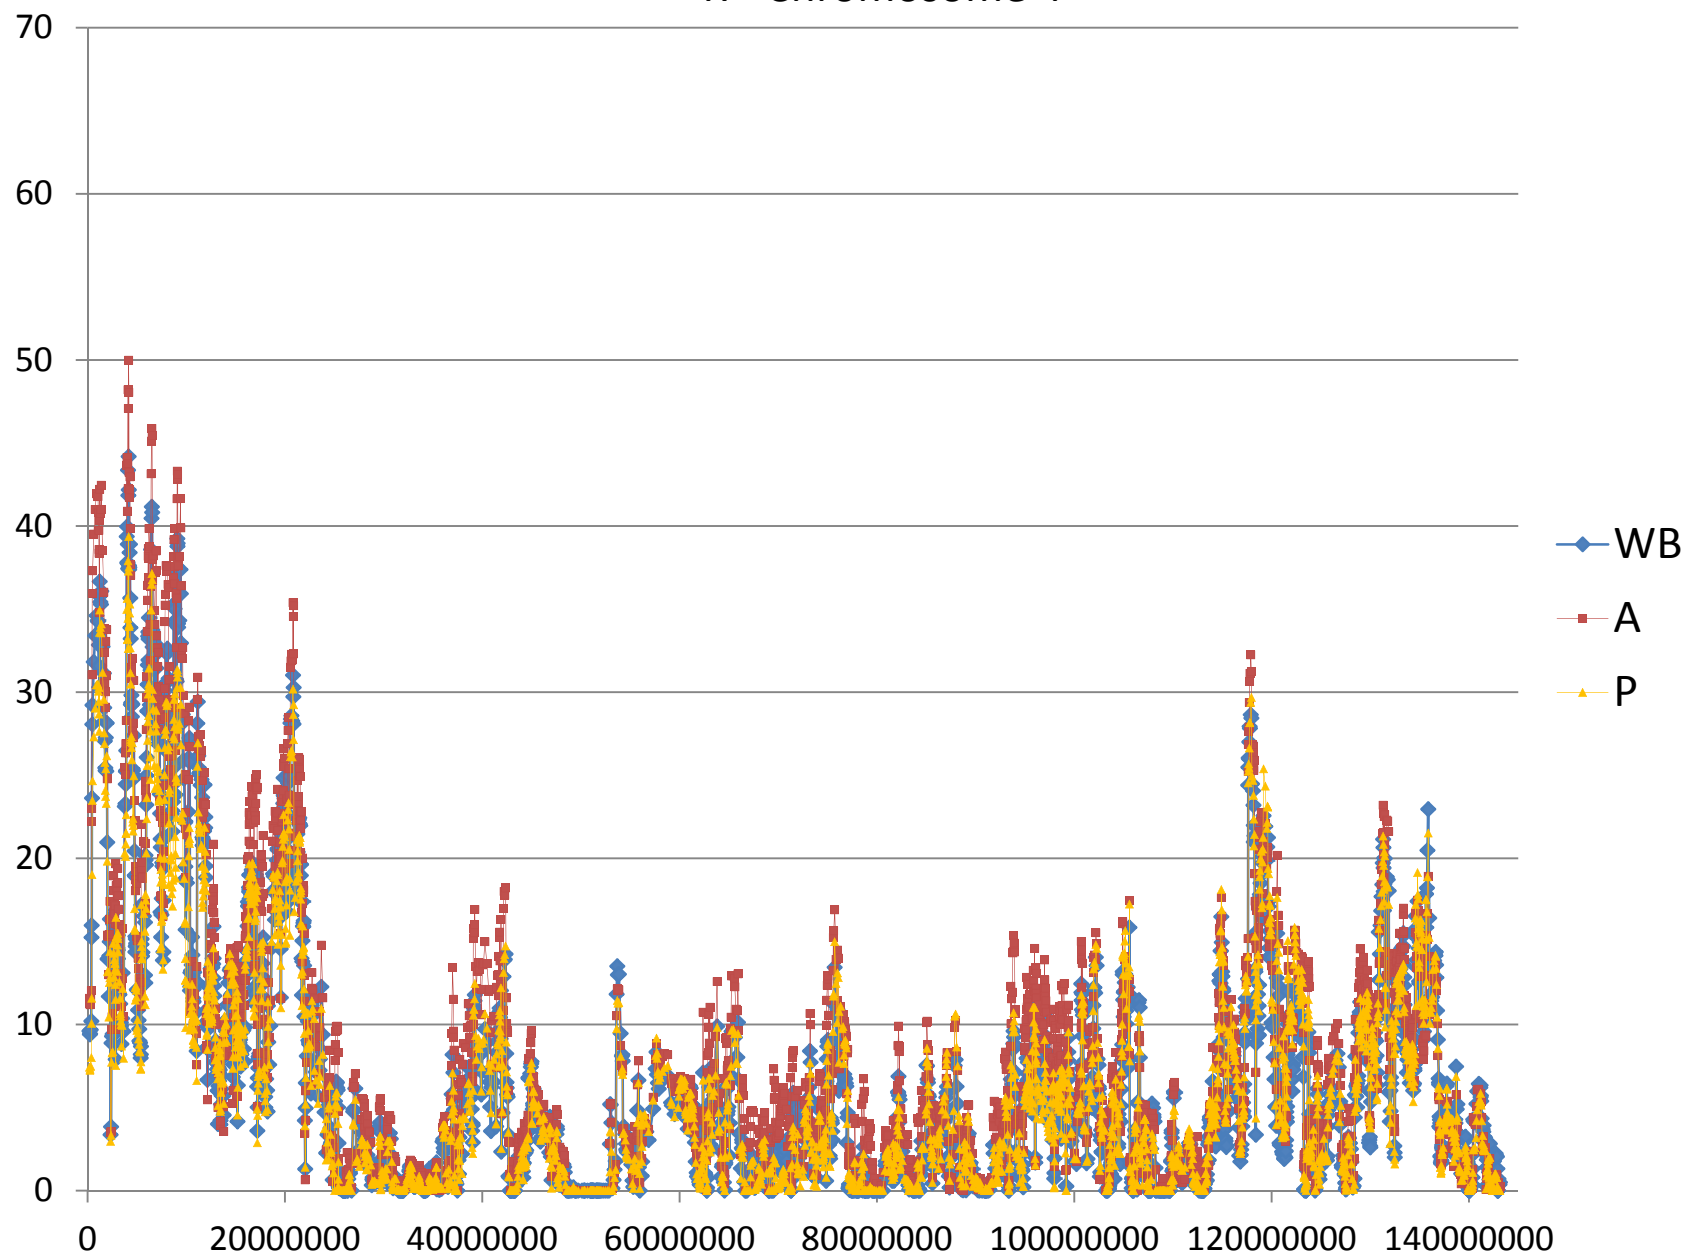

# R - Chromosome 5

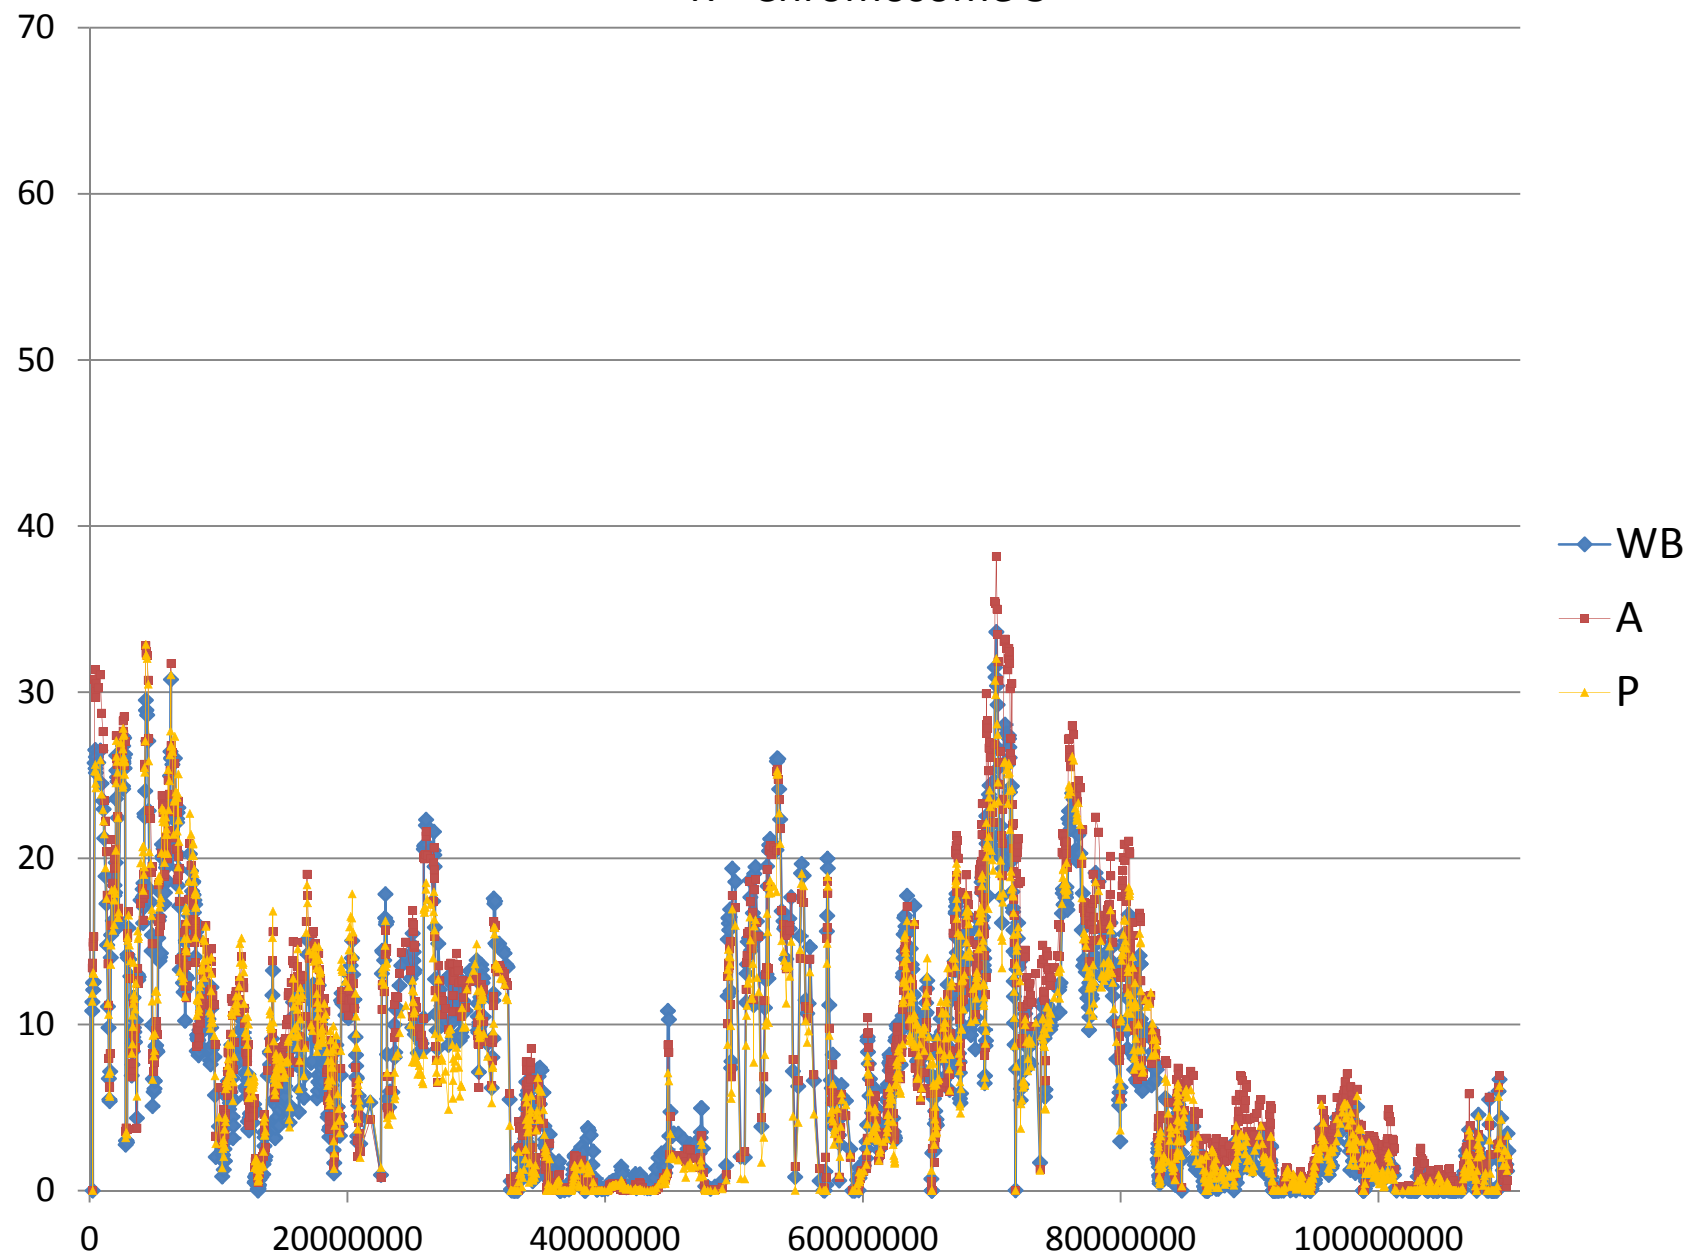

# R - Chromosome 6

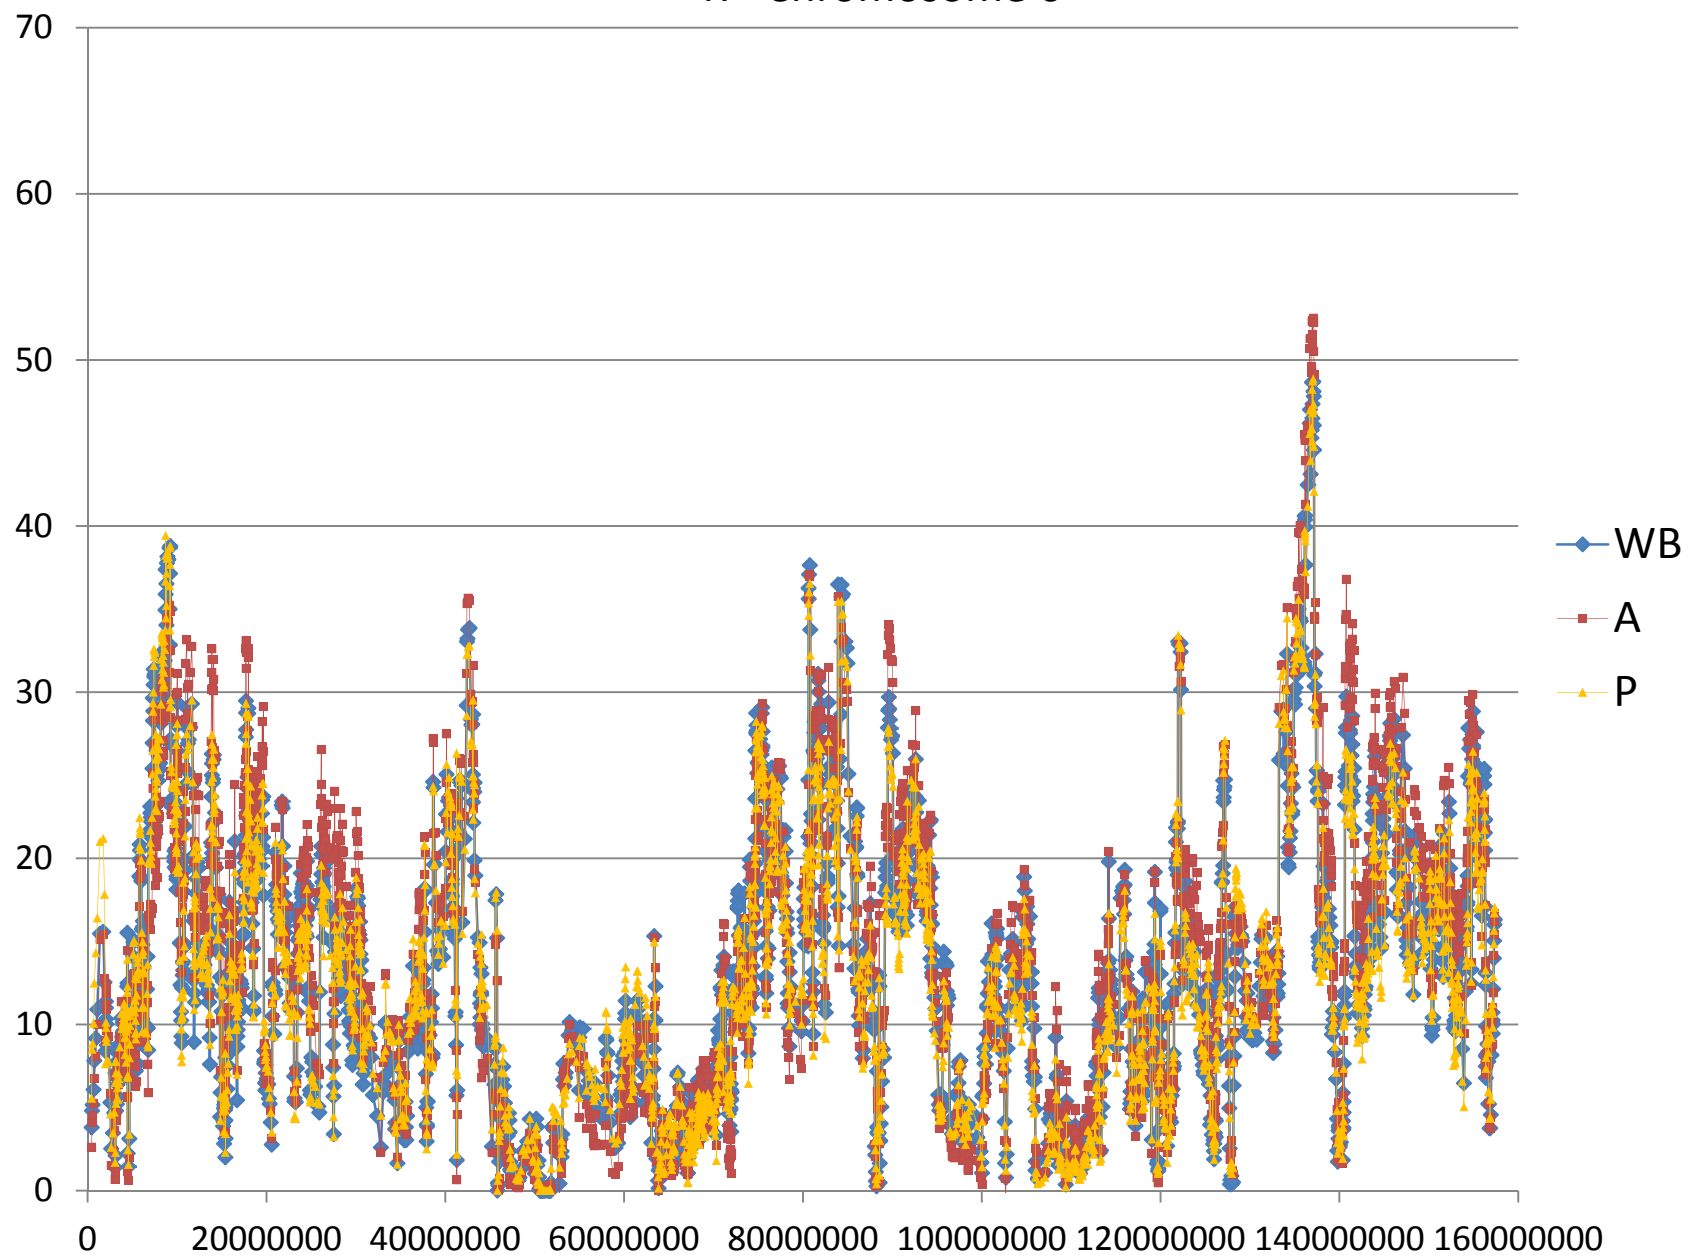

# R - Chromosome 7

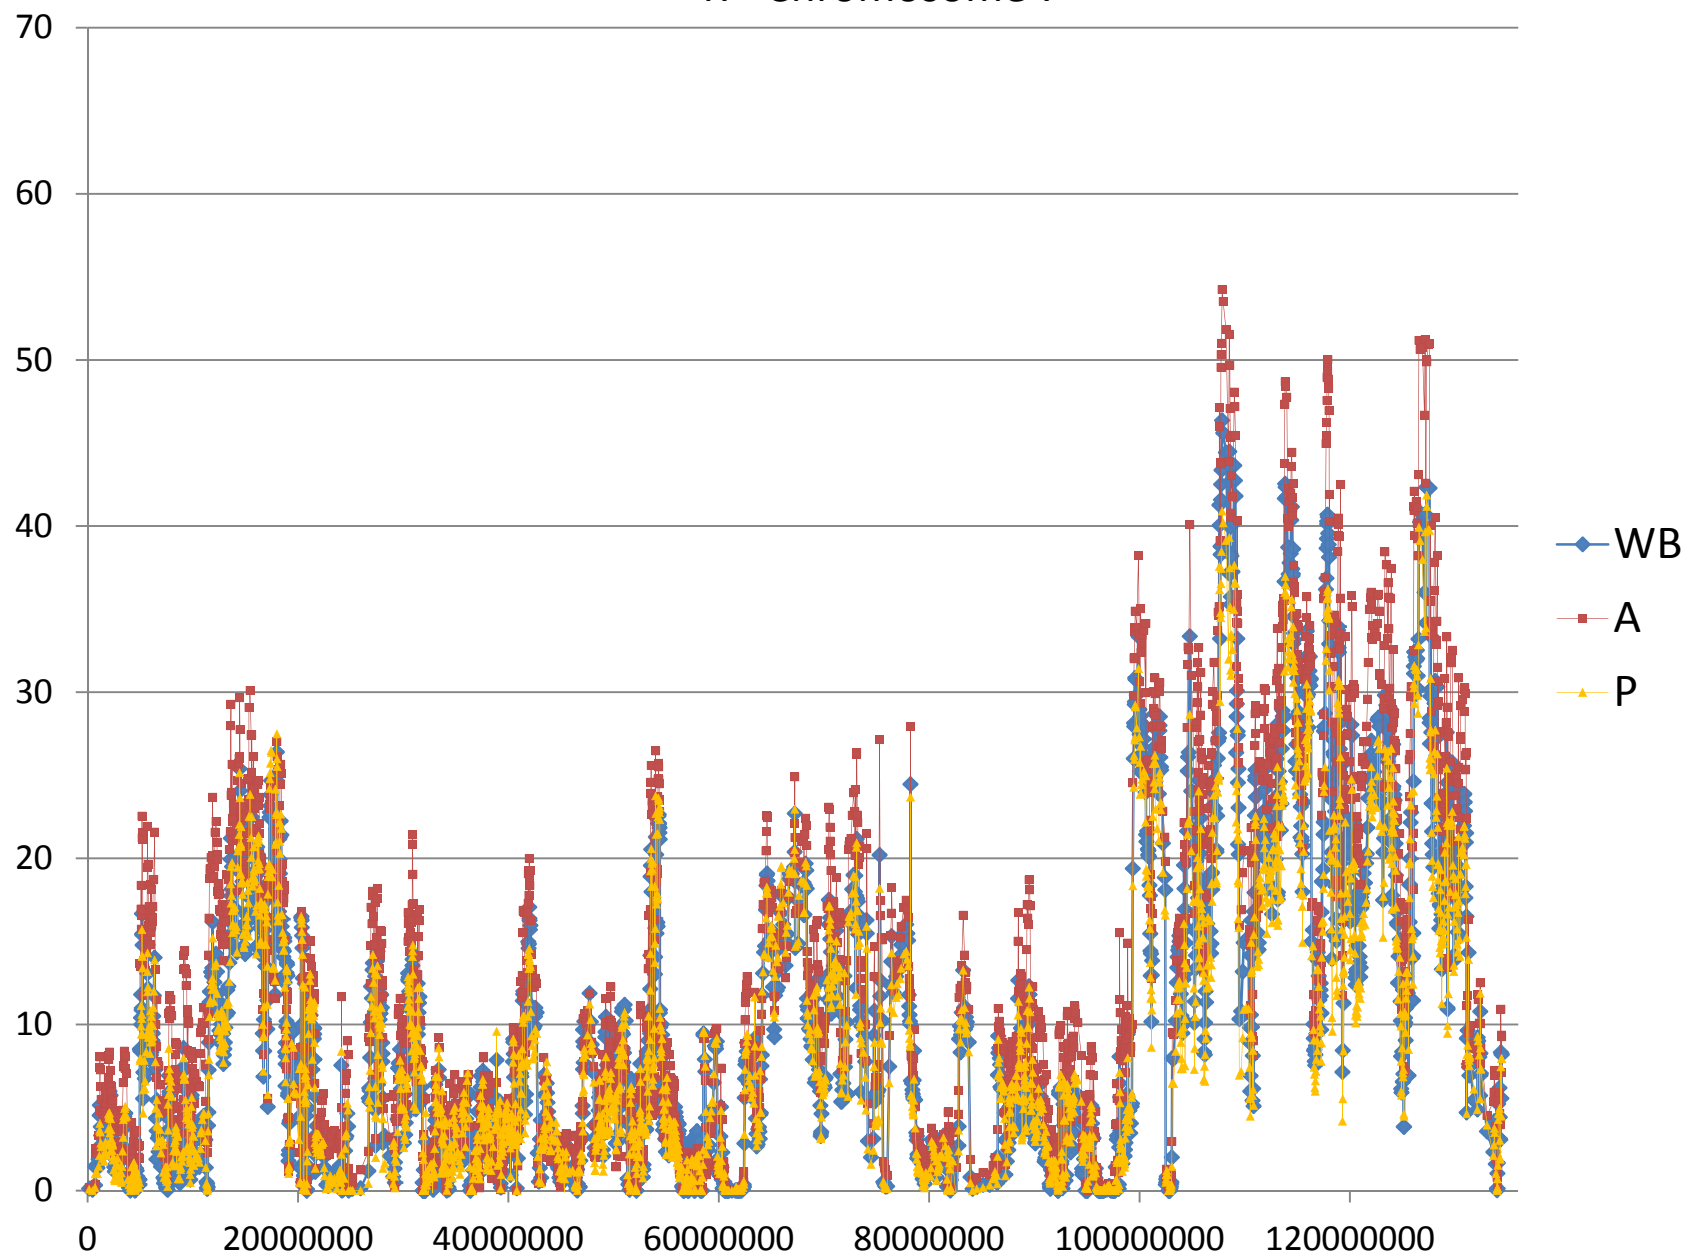

# R - Chromosome 8

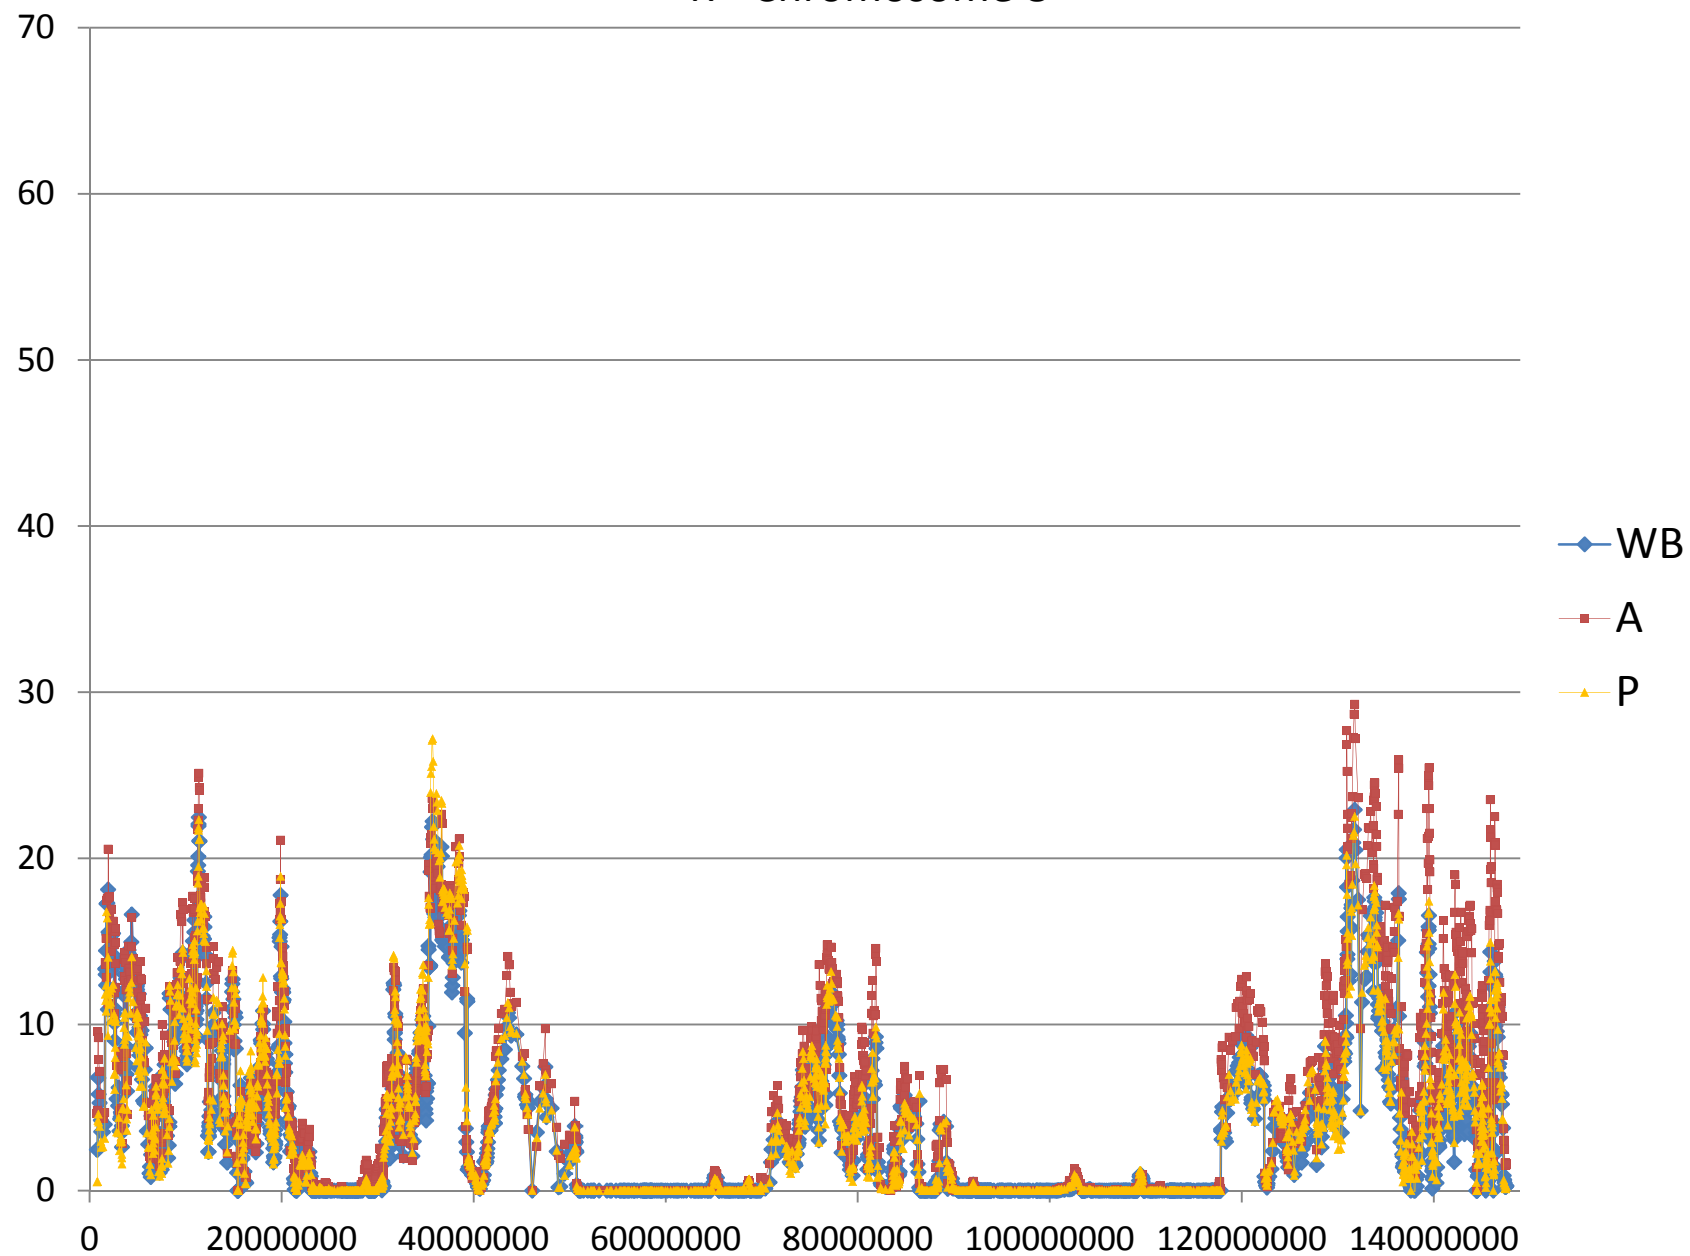



# R - Chromosome 9

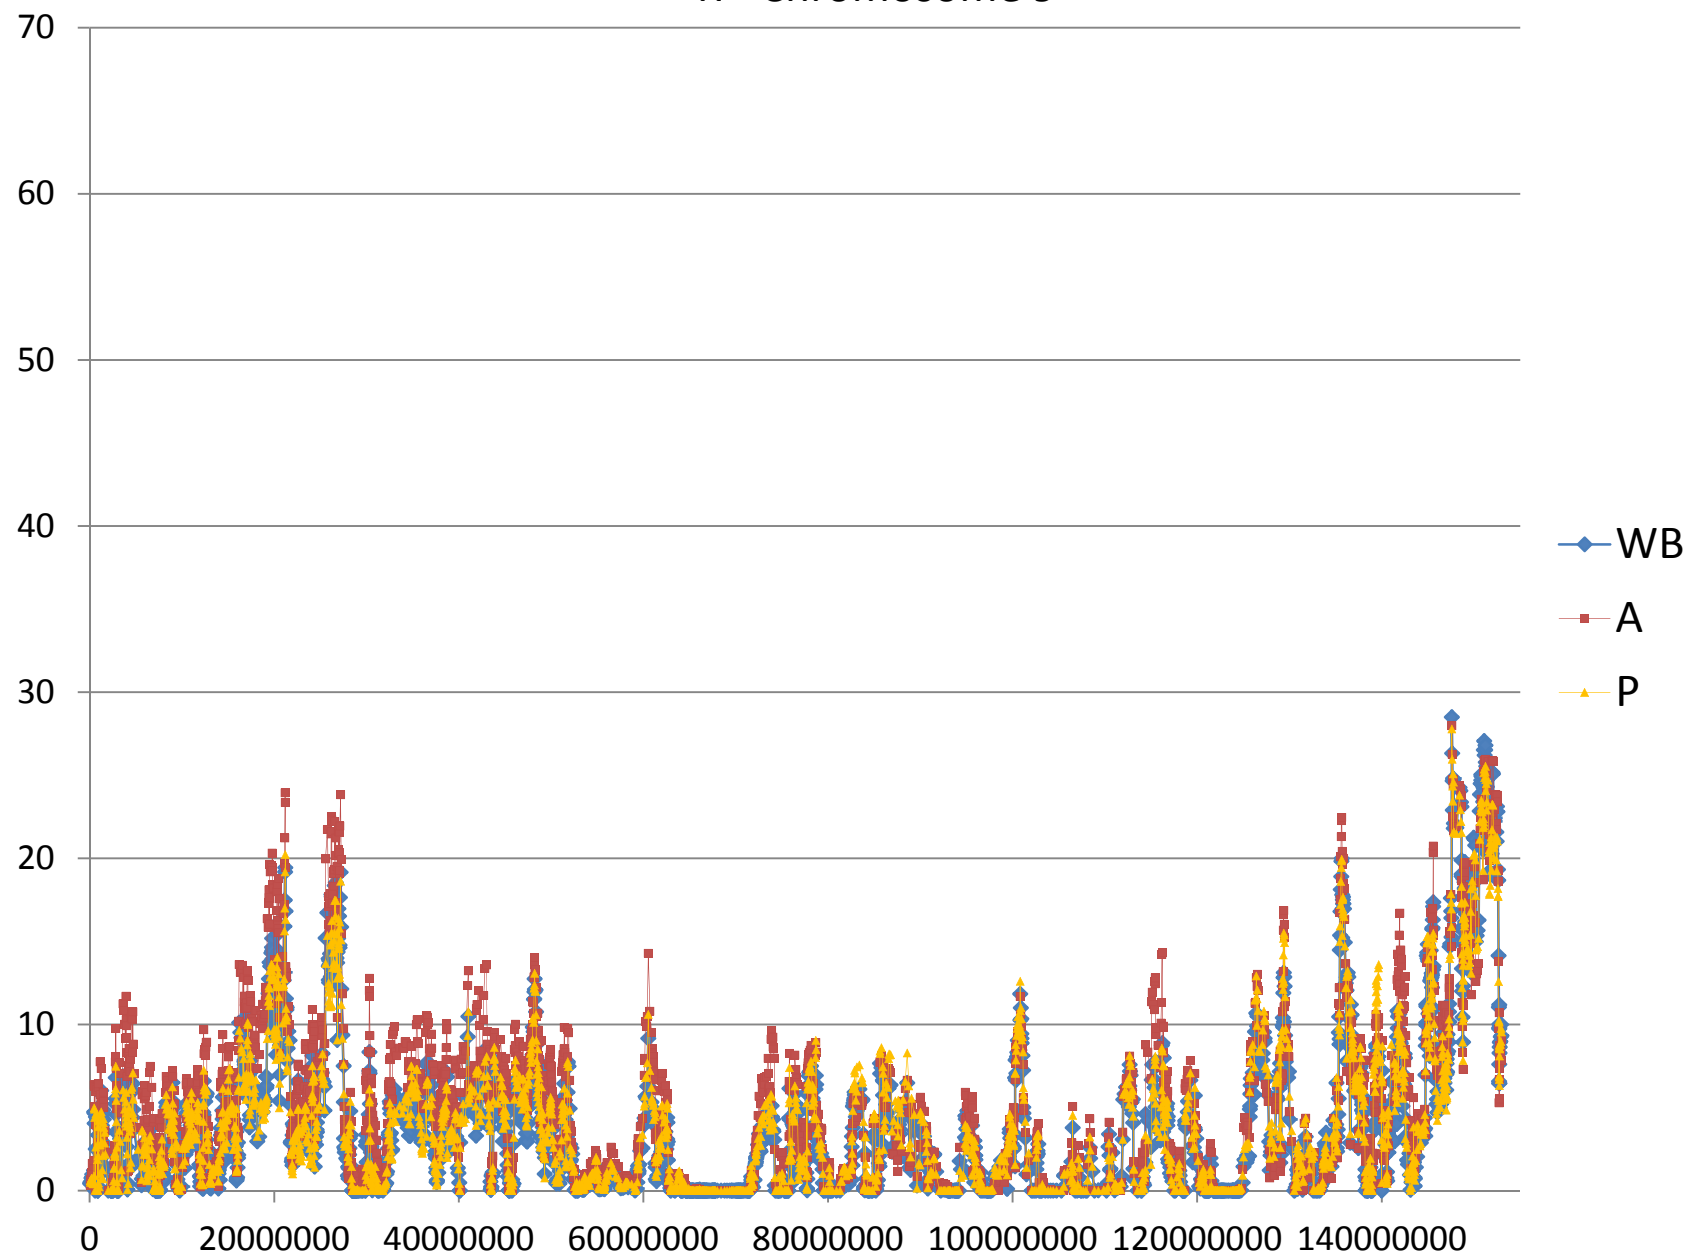

# R - Chromosome 10

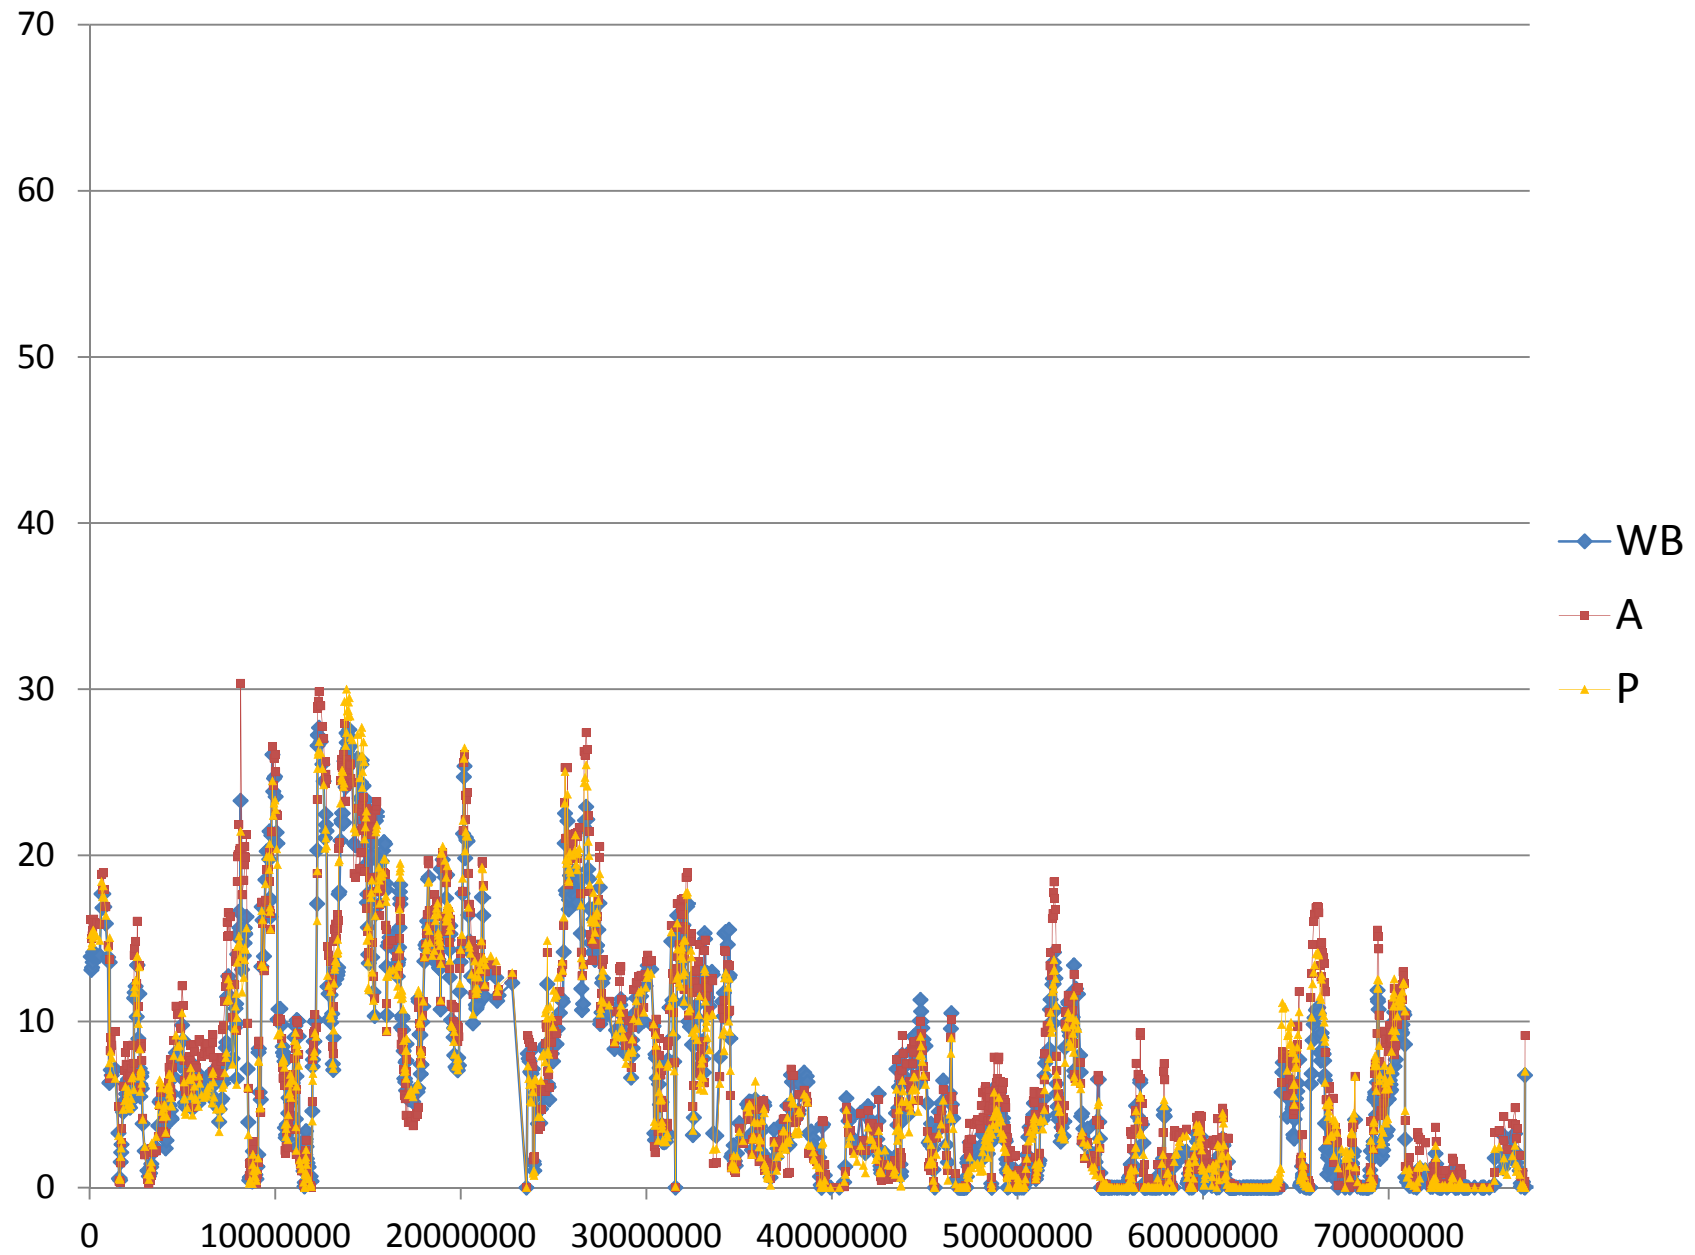

# R - Chromosome 11

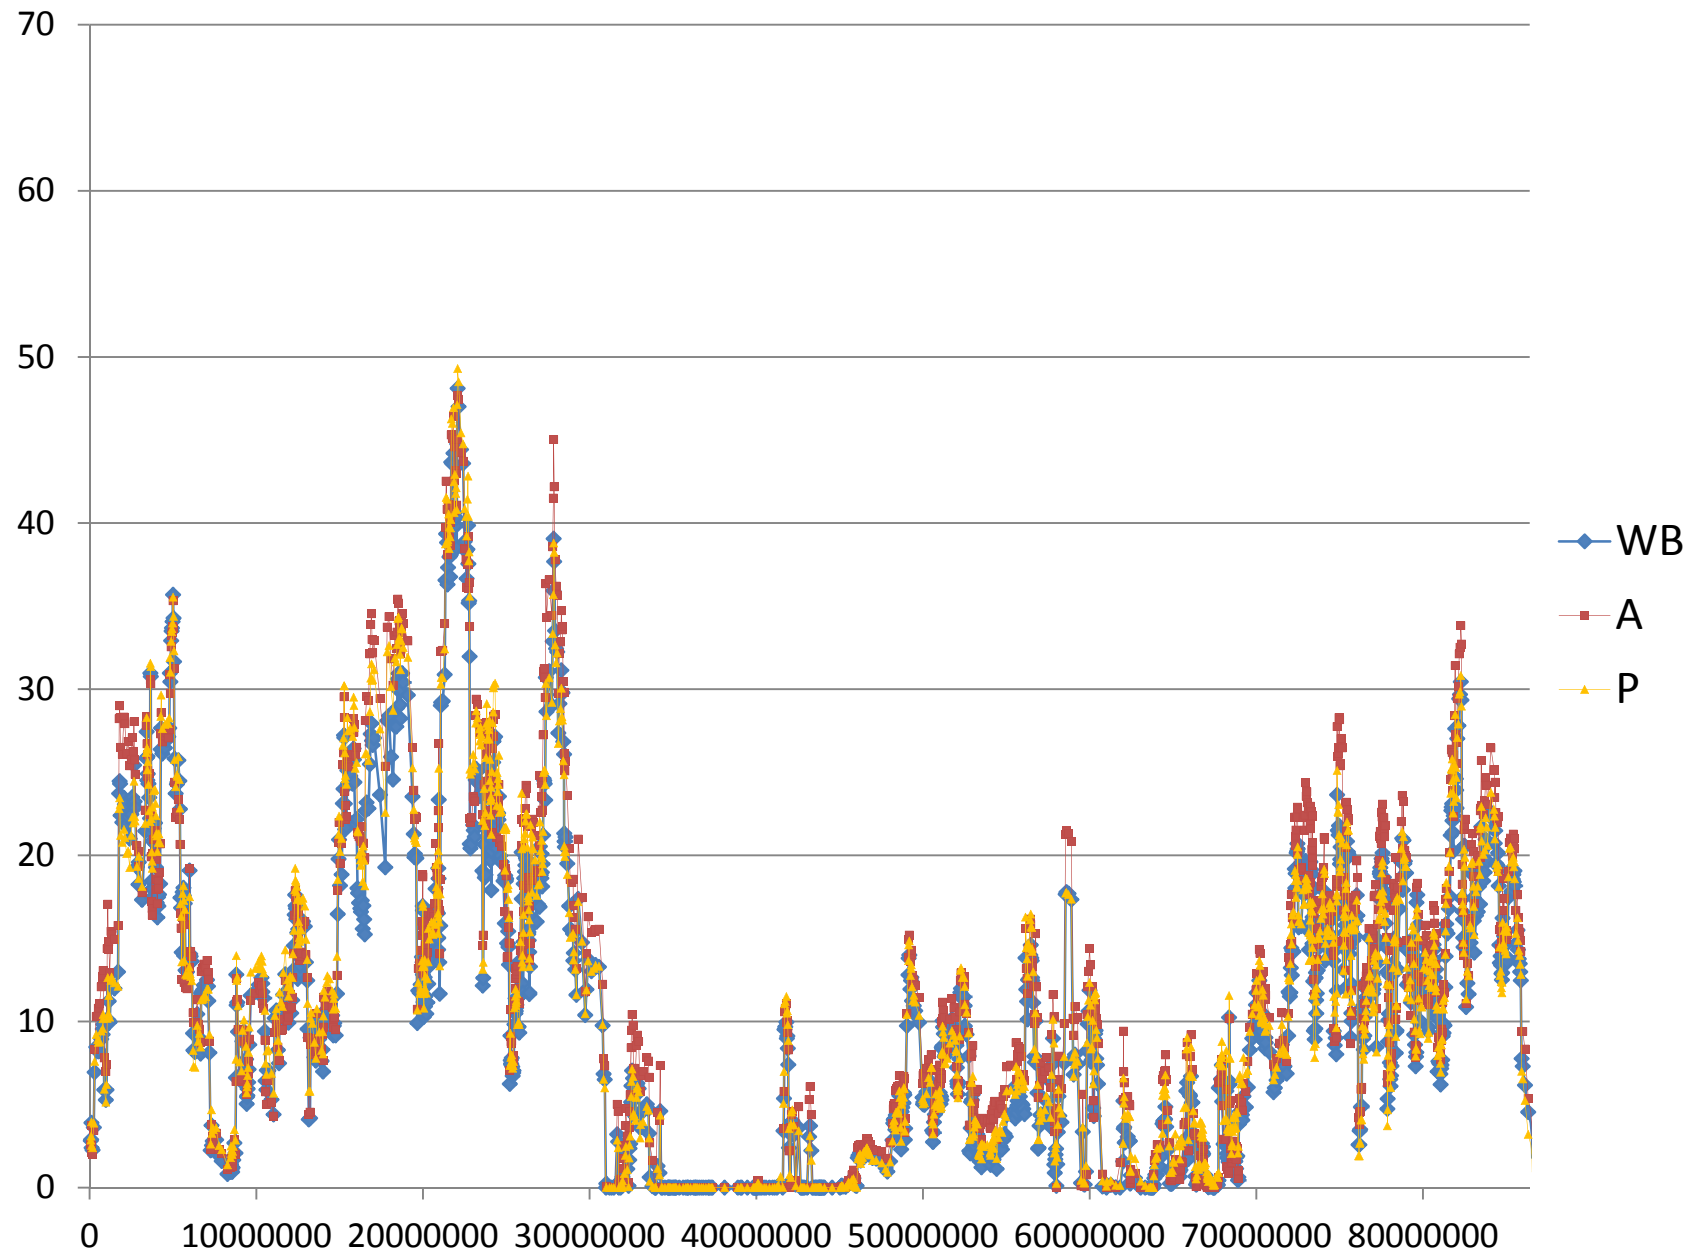

# R - Chromosome 12

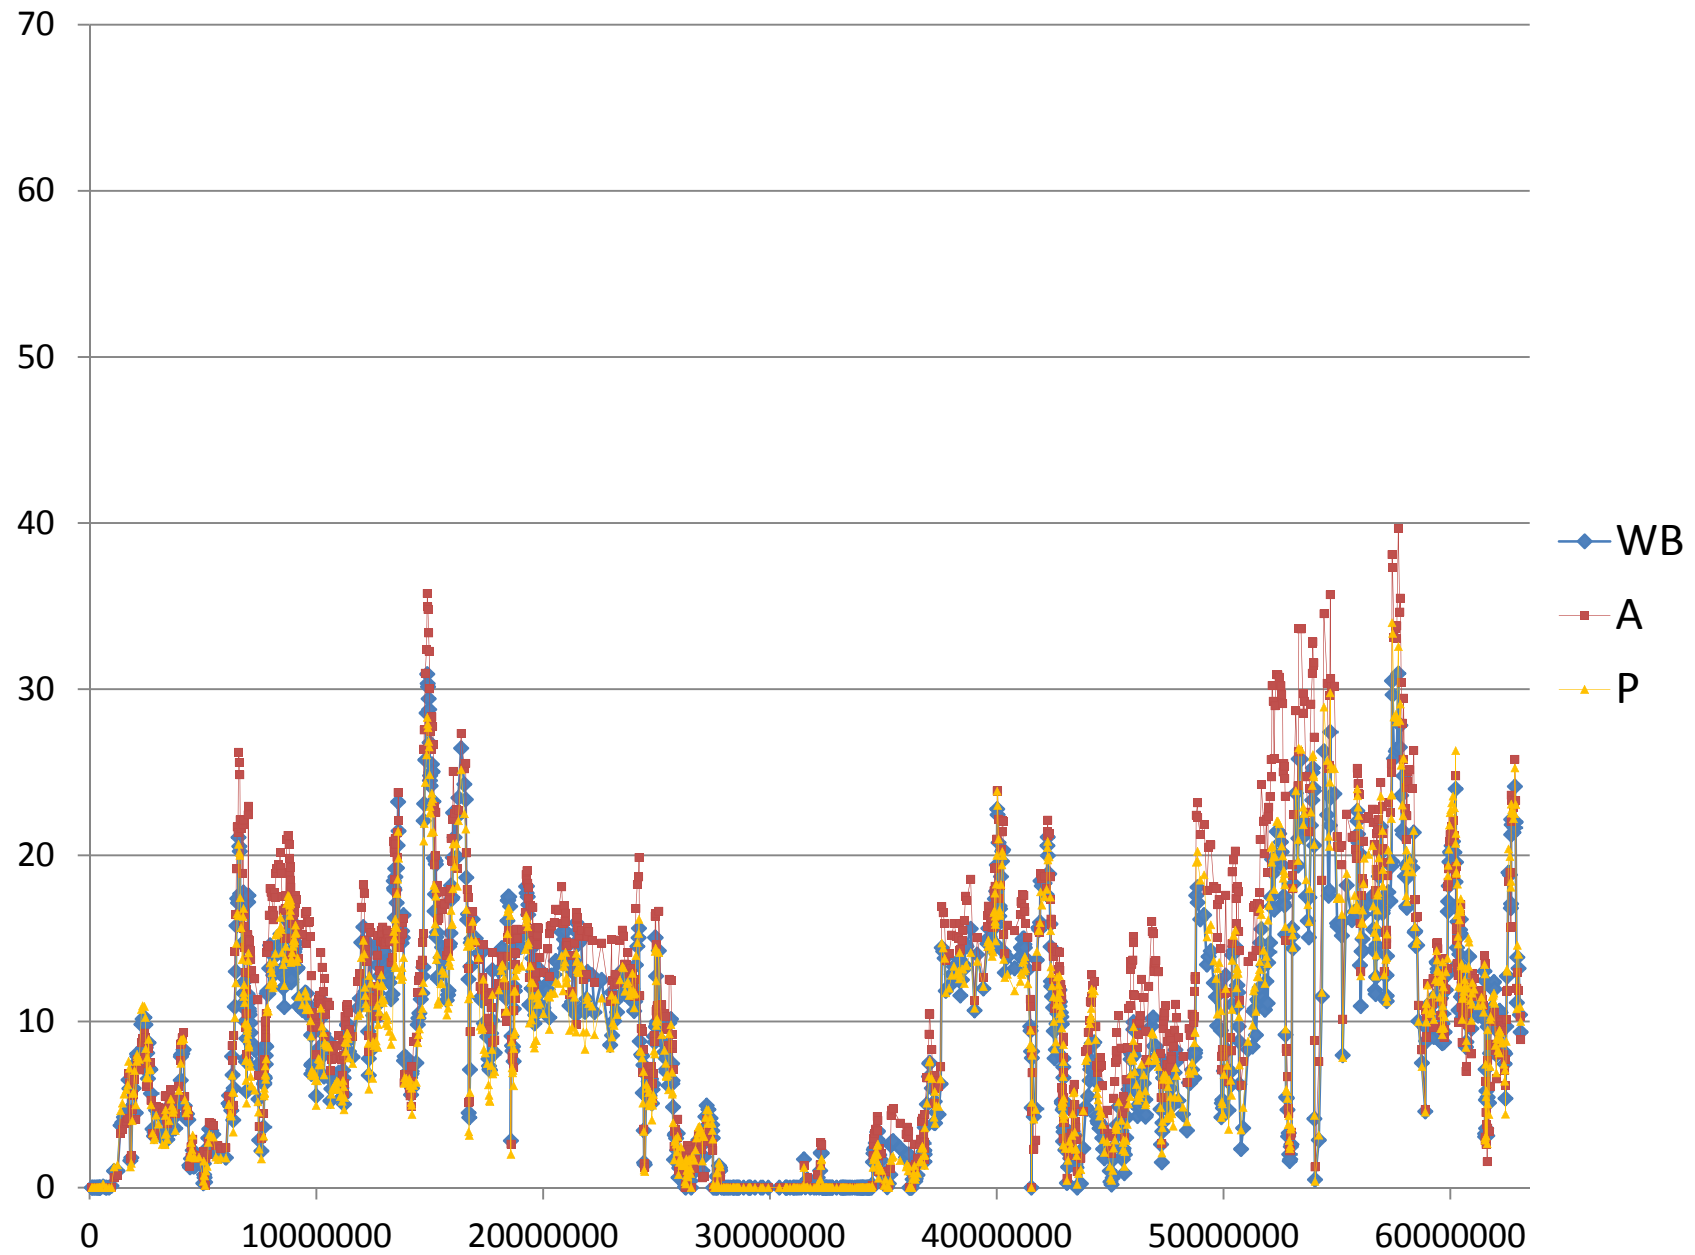

# R - Chromosome 13

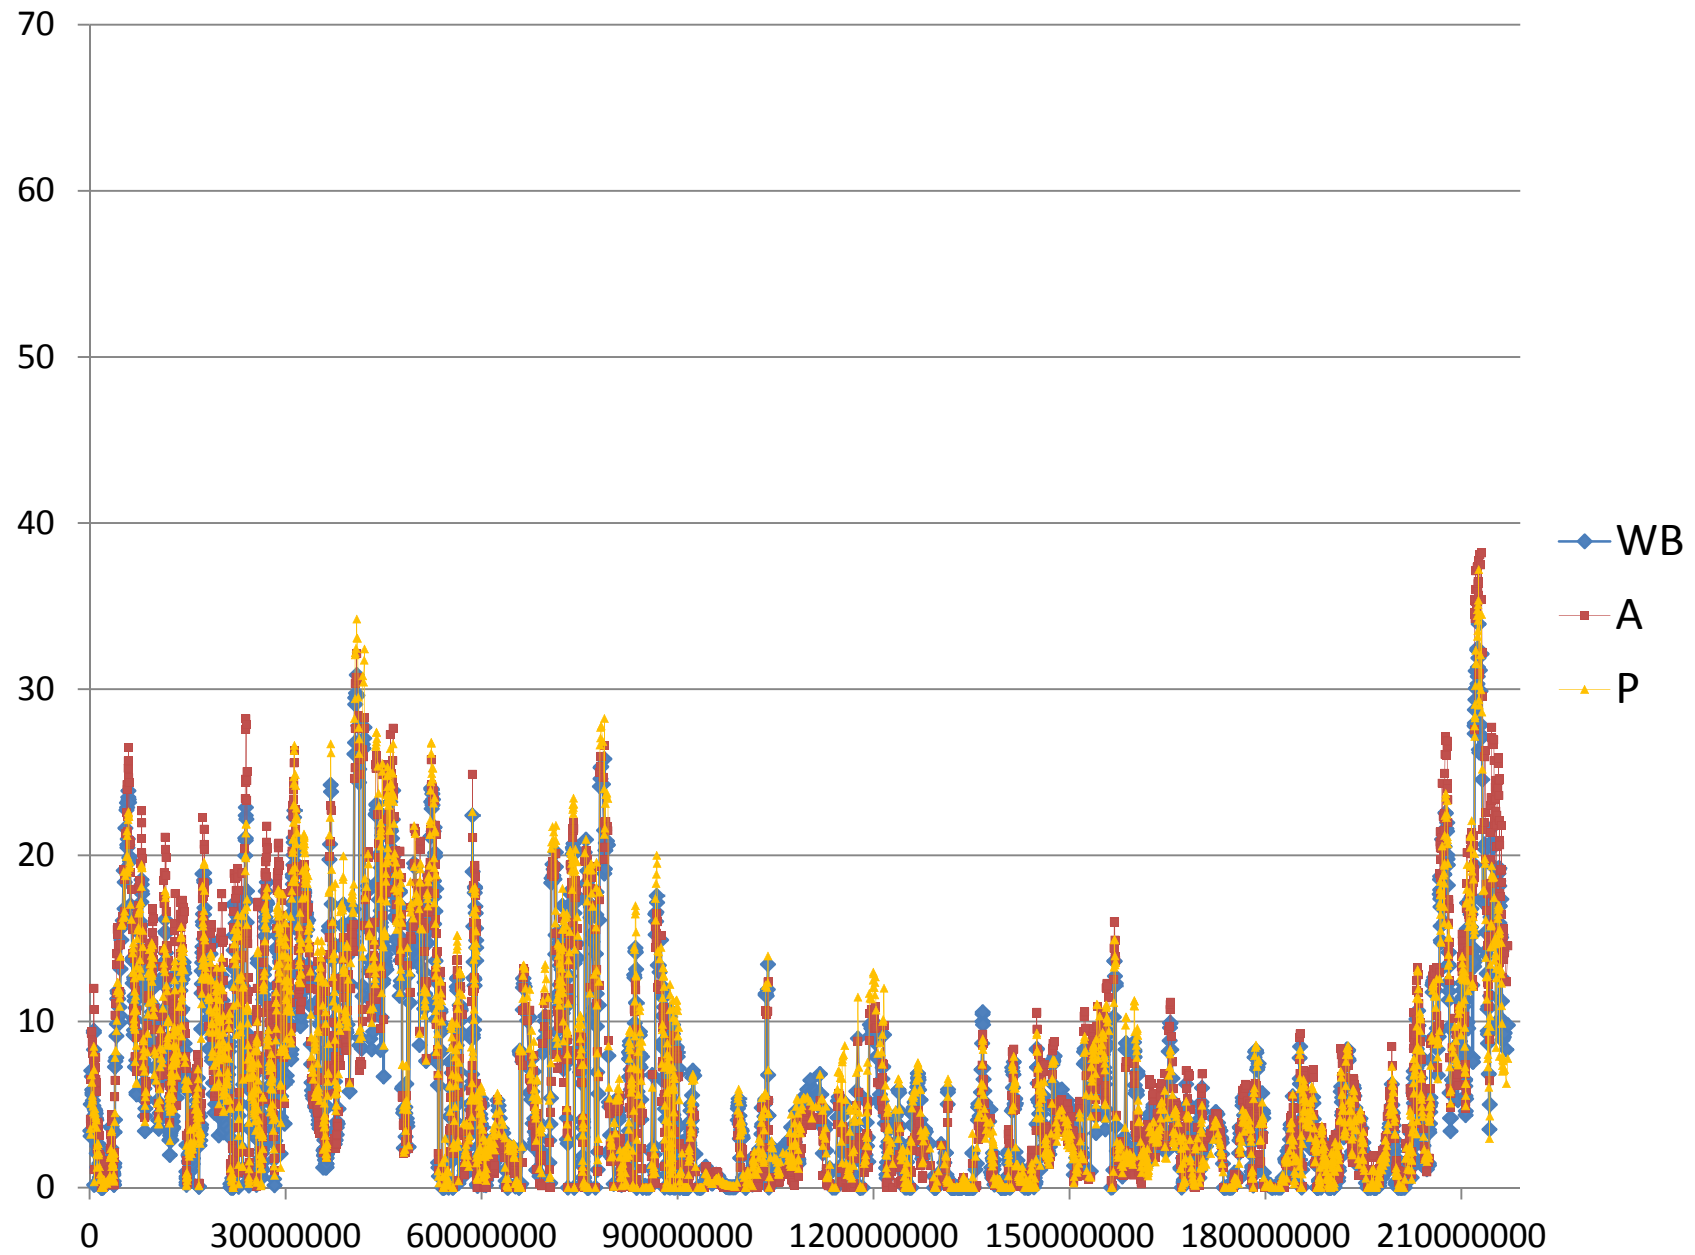

# R - Chromosome 14

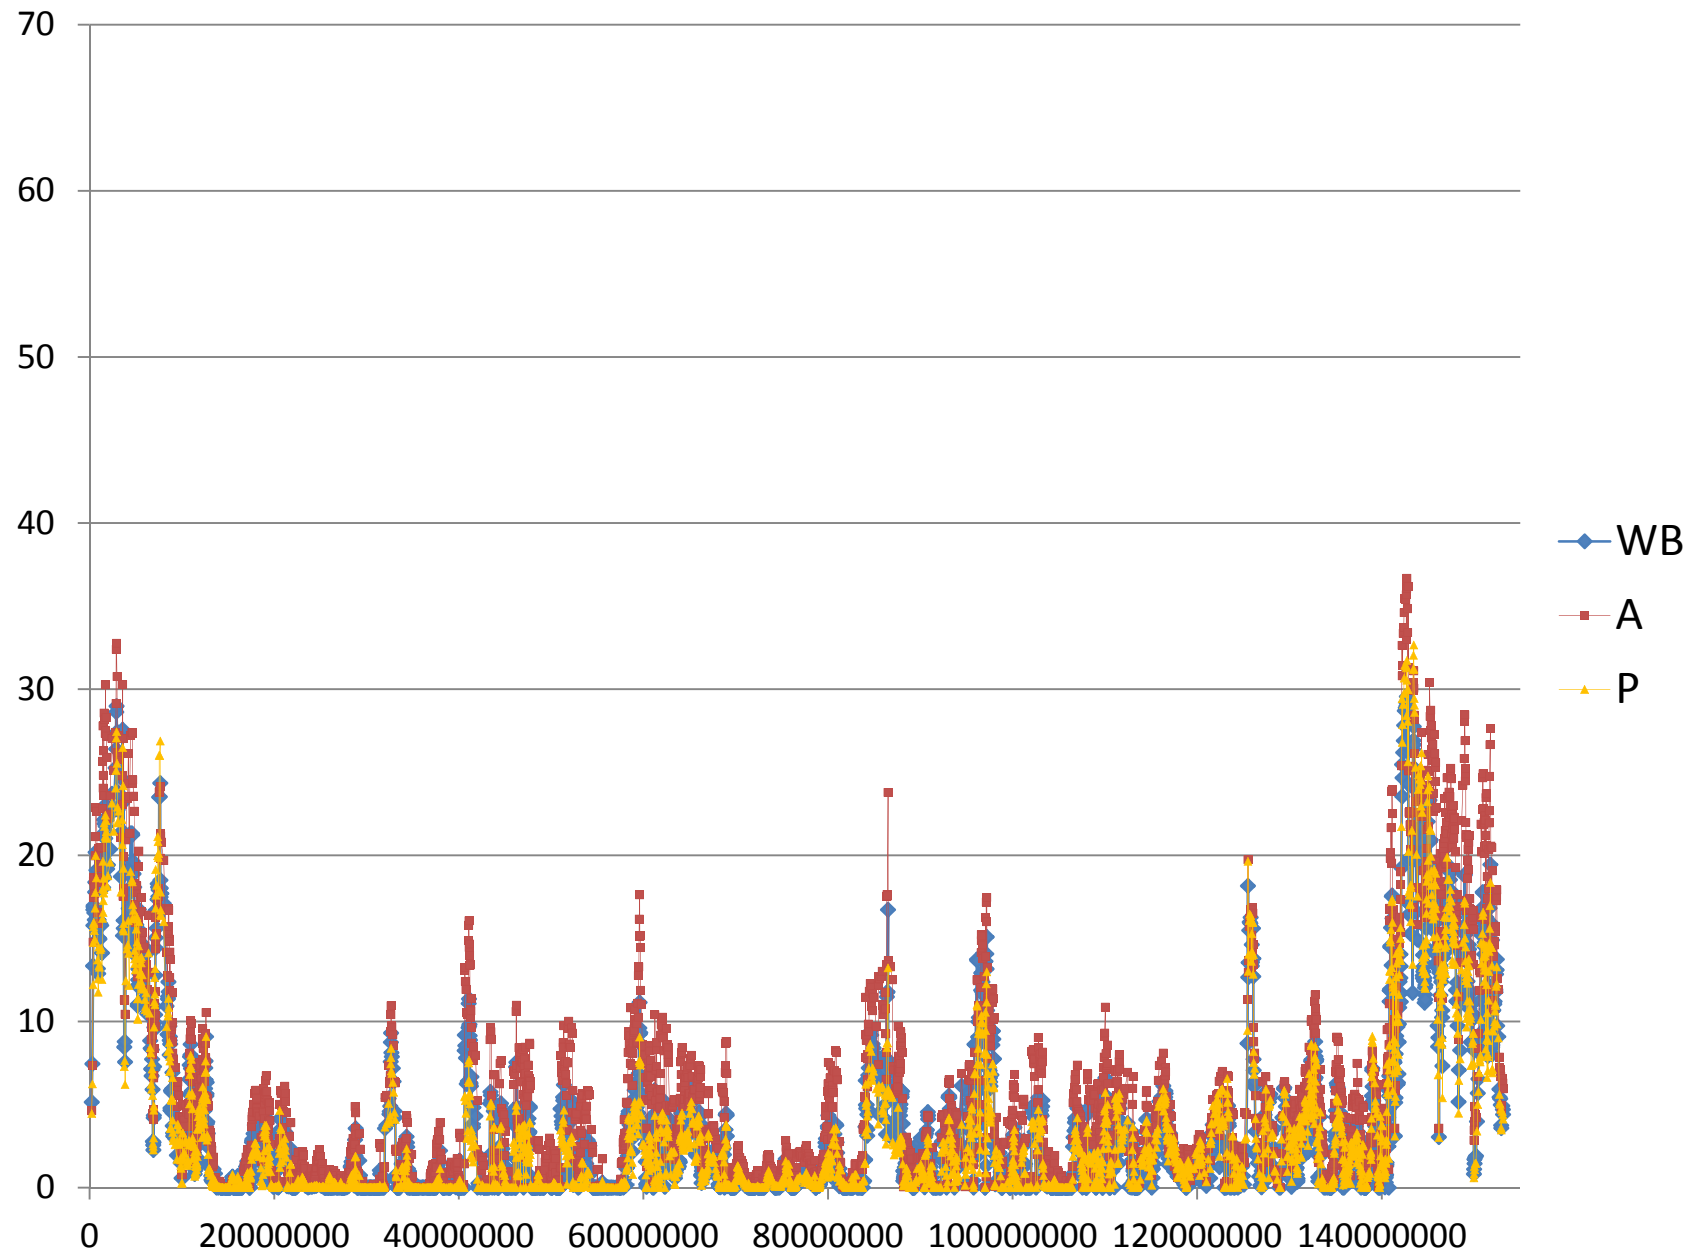

R - Chromosome 15

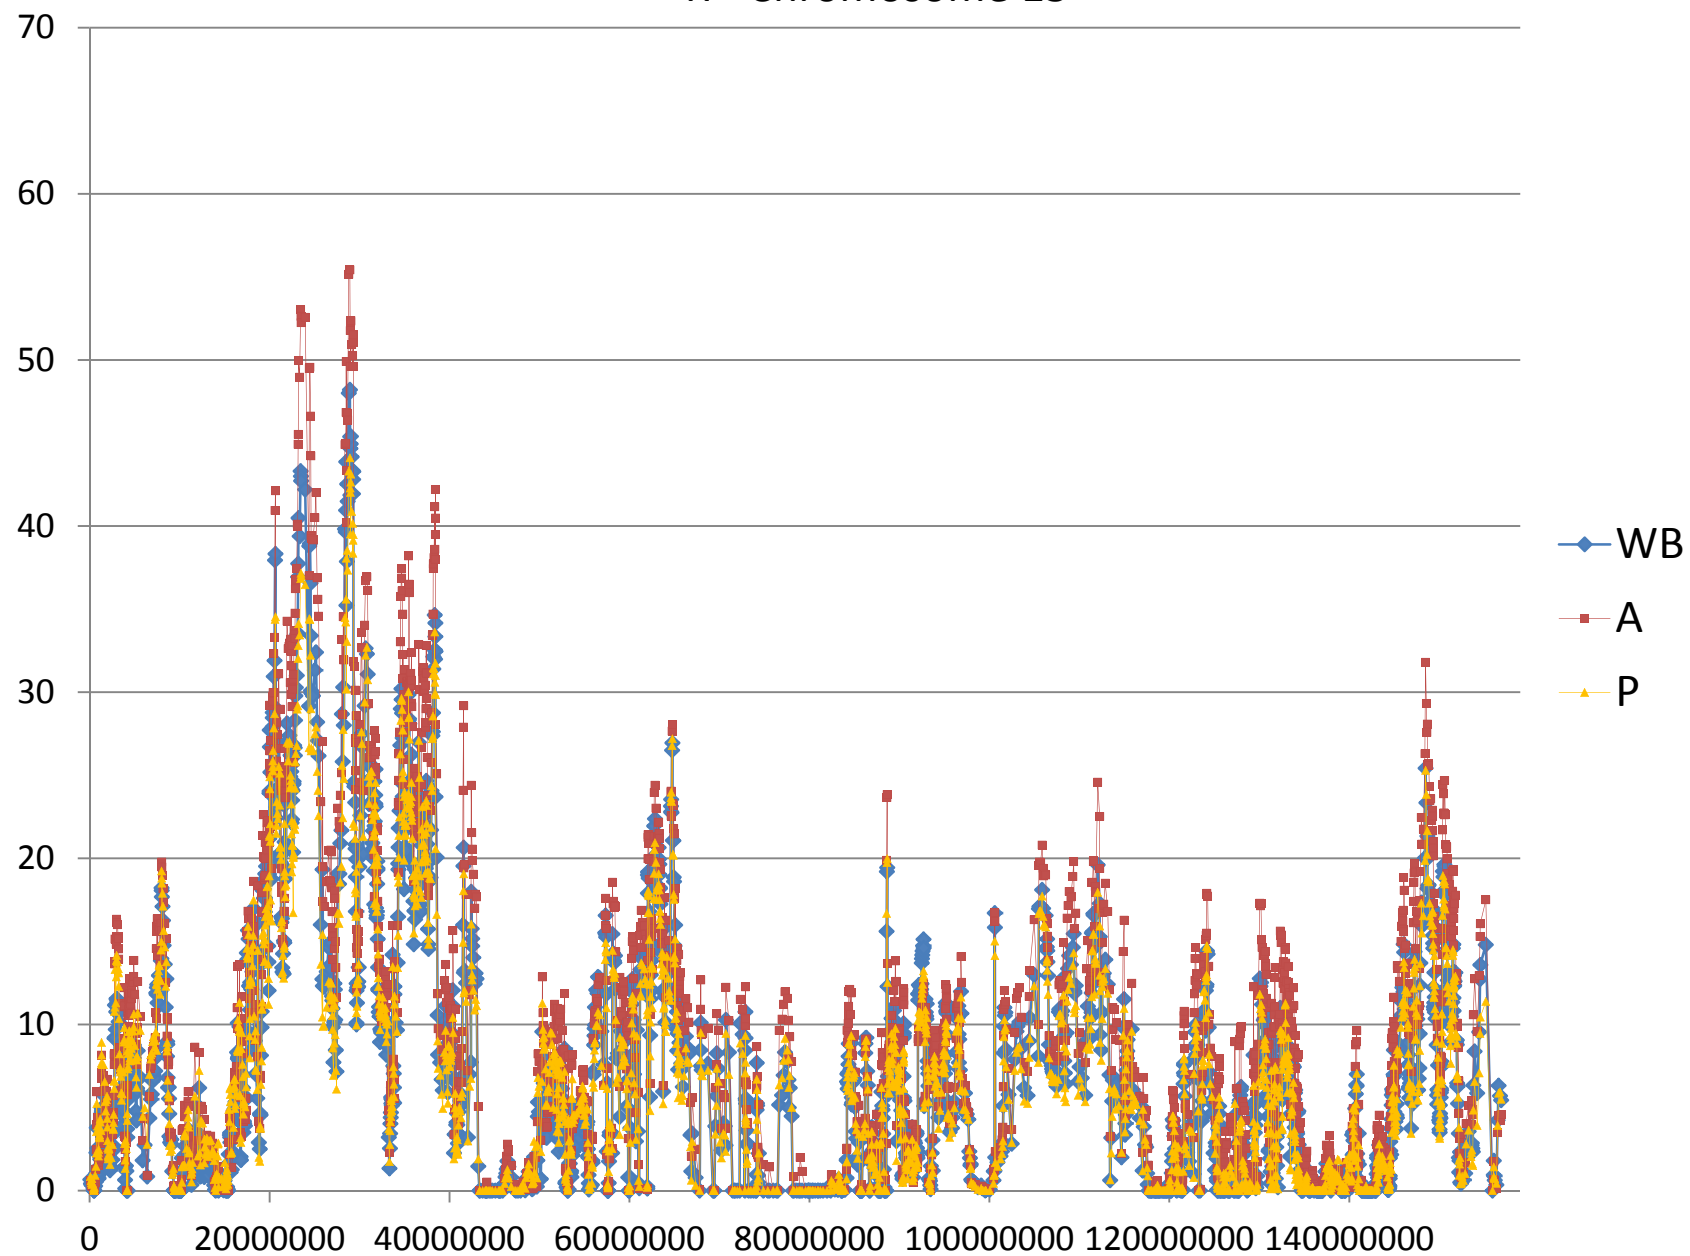

# R - Chromosome 16

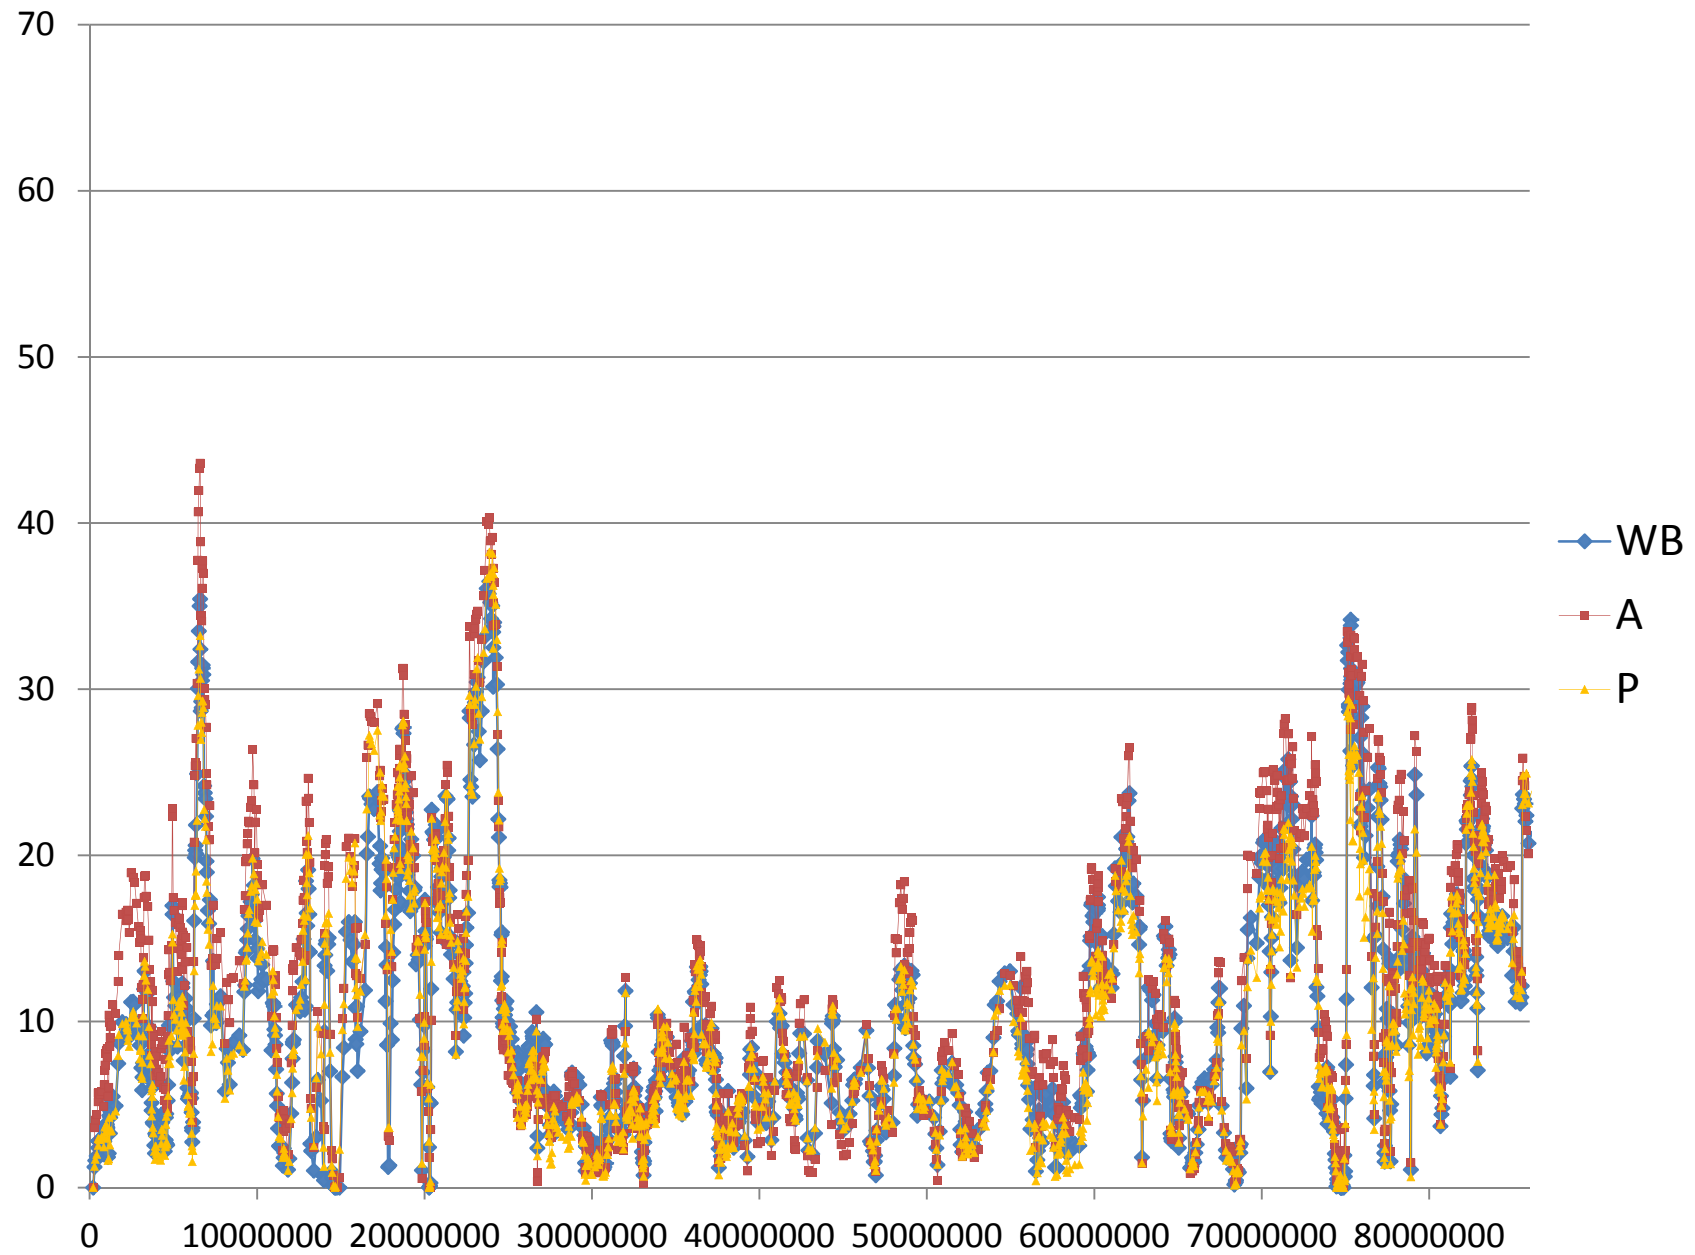



# R - Chromosome 17

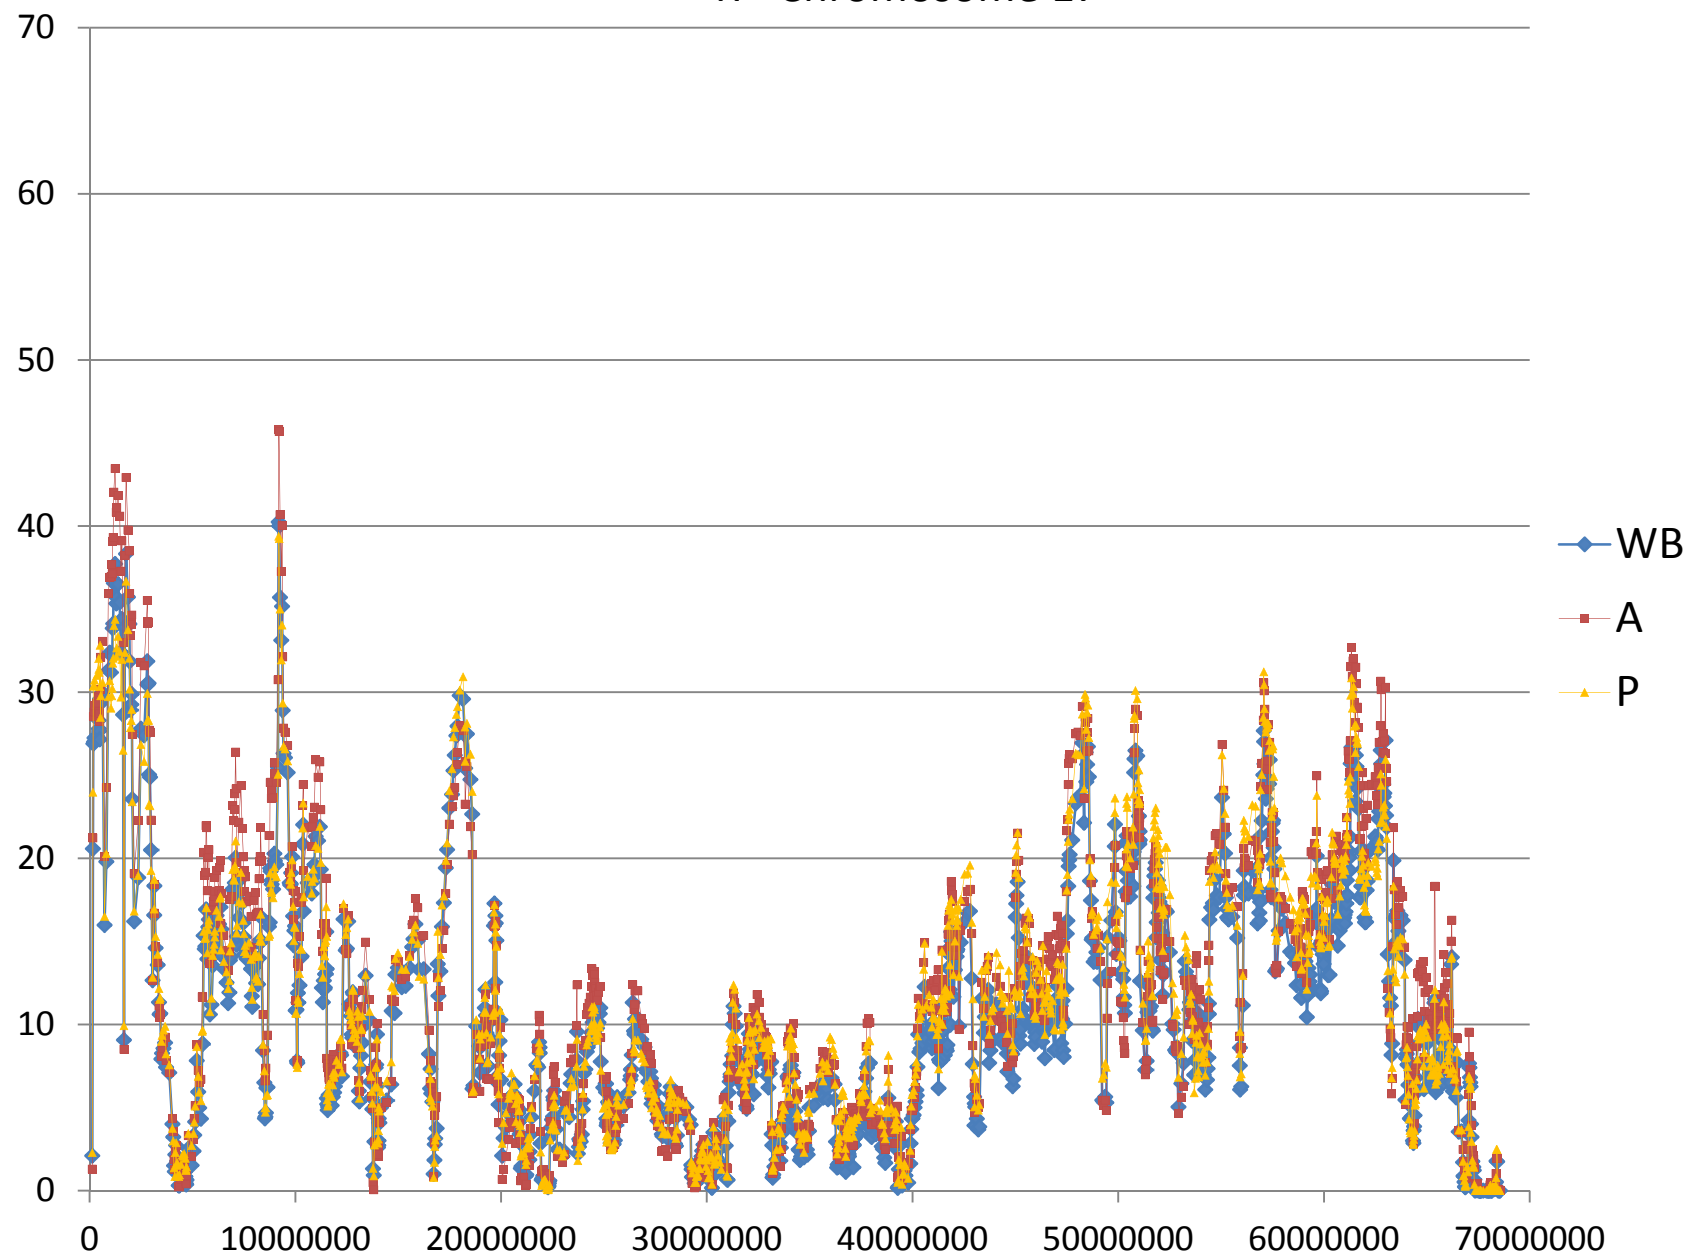

# R - Chromosome 18

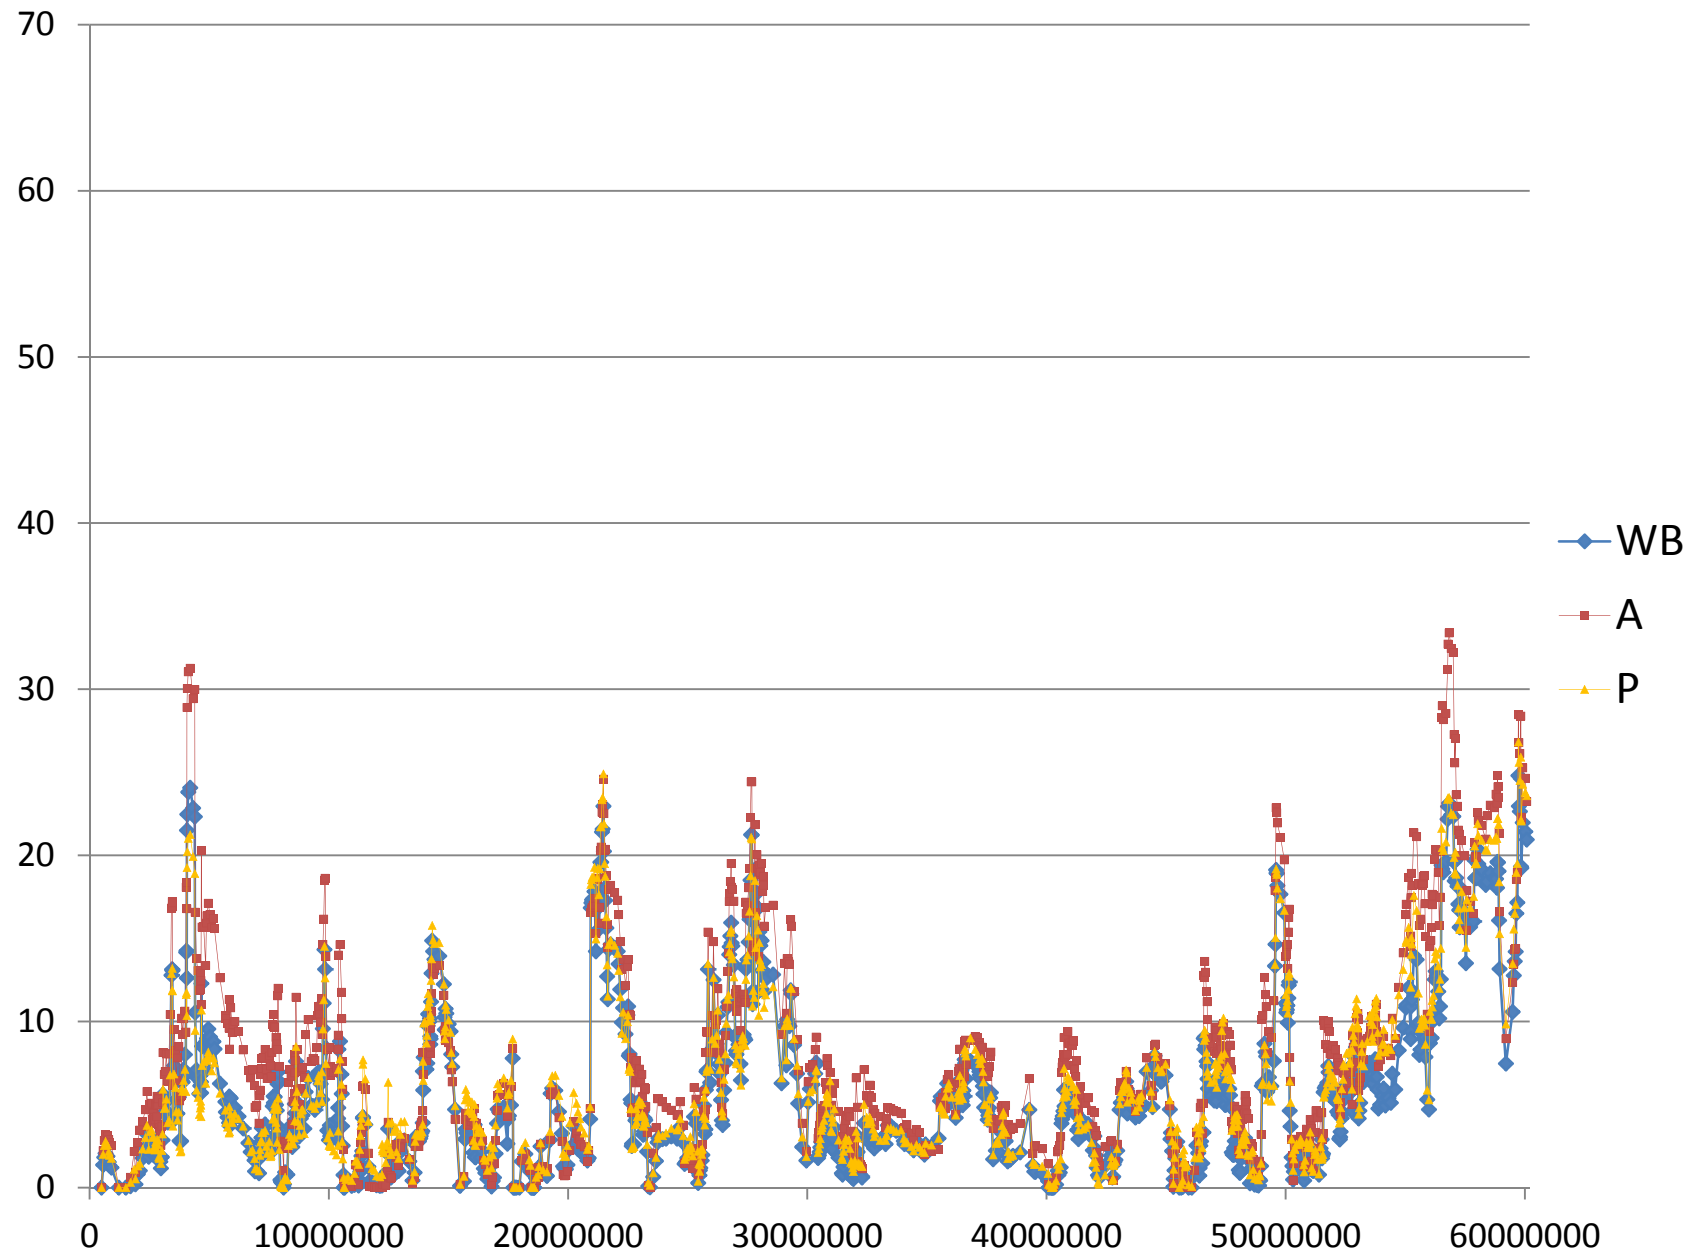

Supplement: Supplementary file 8 [file aab-60-51-2017-supplement.zip]
