# Supplementary material for: Genome-wide QTL mapping results for regional DXA body composition and bone mineral density traits in pigs
Source: Copernicus journal article supplement (doi:10.5194/aab-60-51-2017), 2017-04-05

# BMD - Chromosome 1

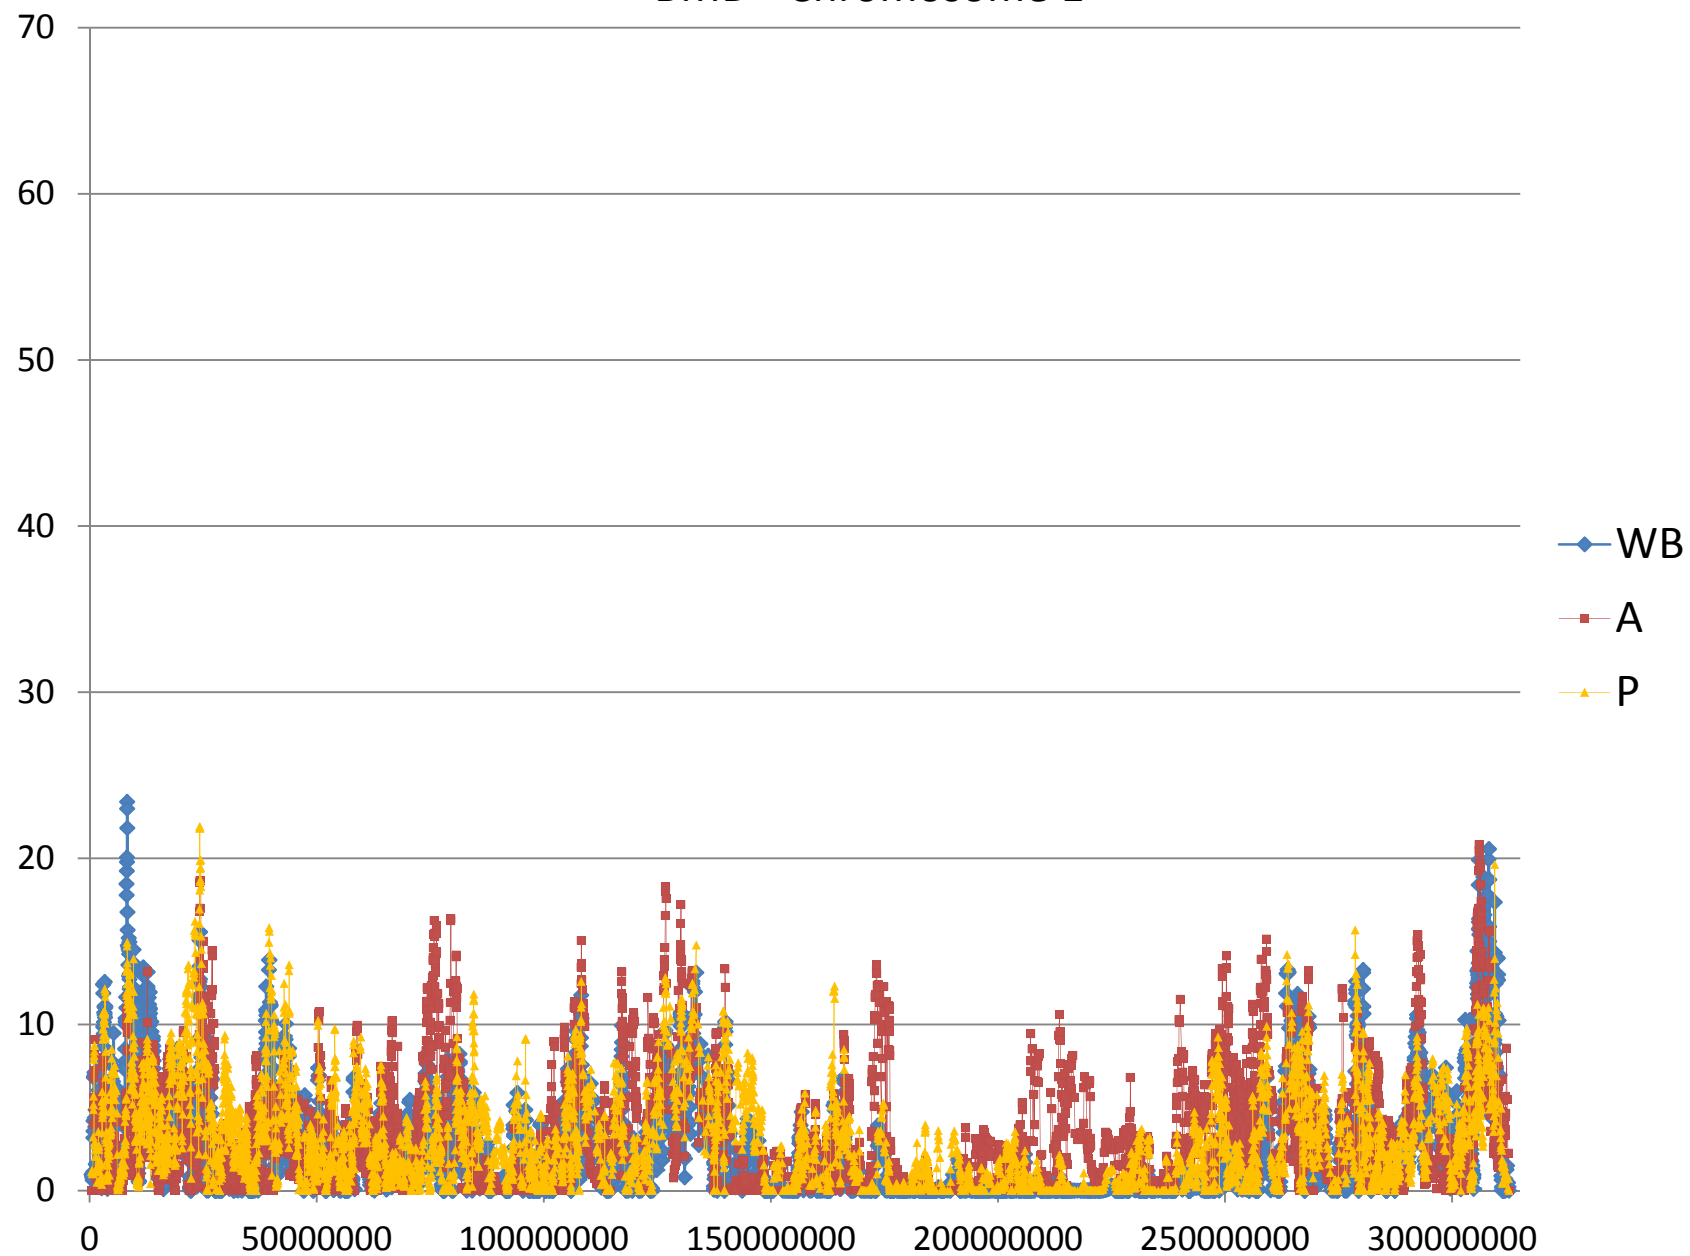

# BMD - Chromosome 2

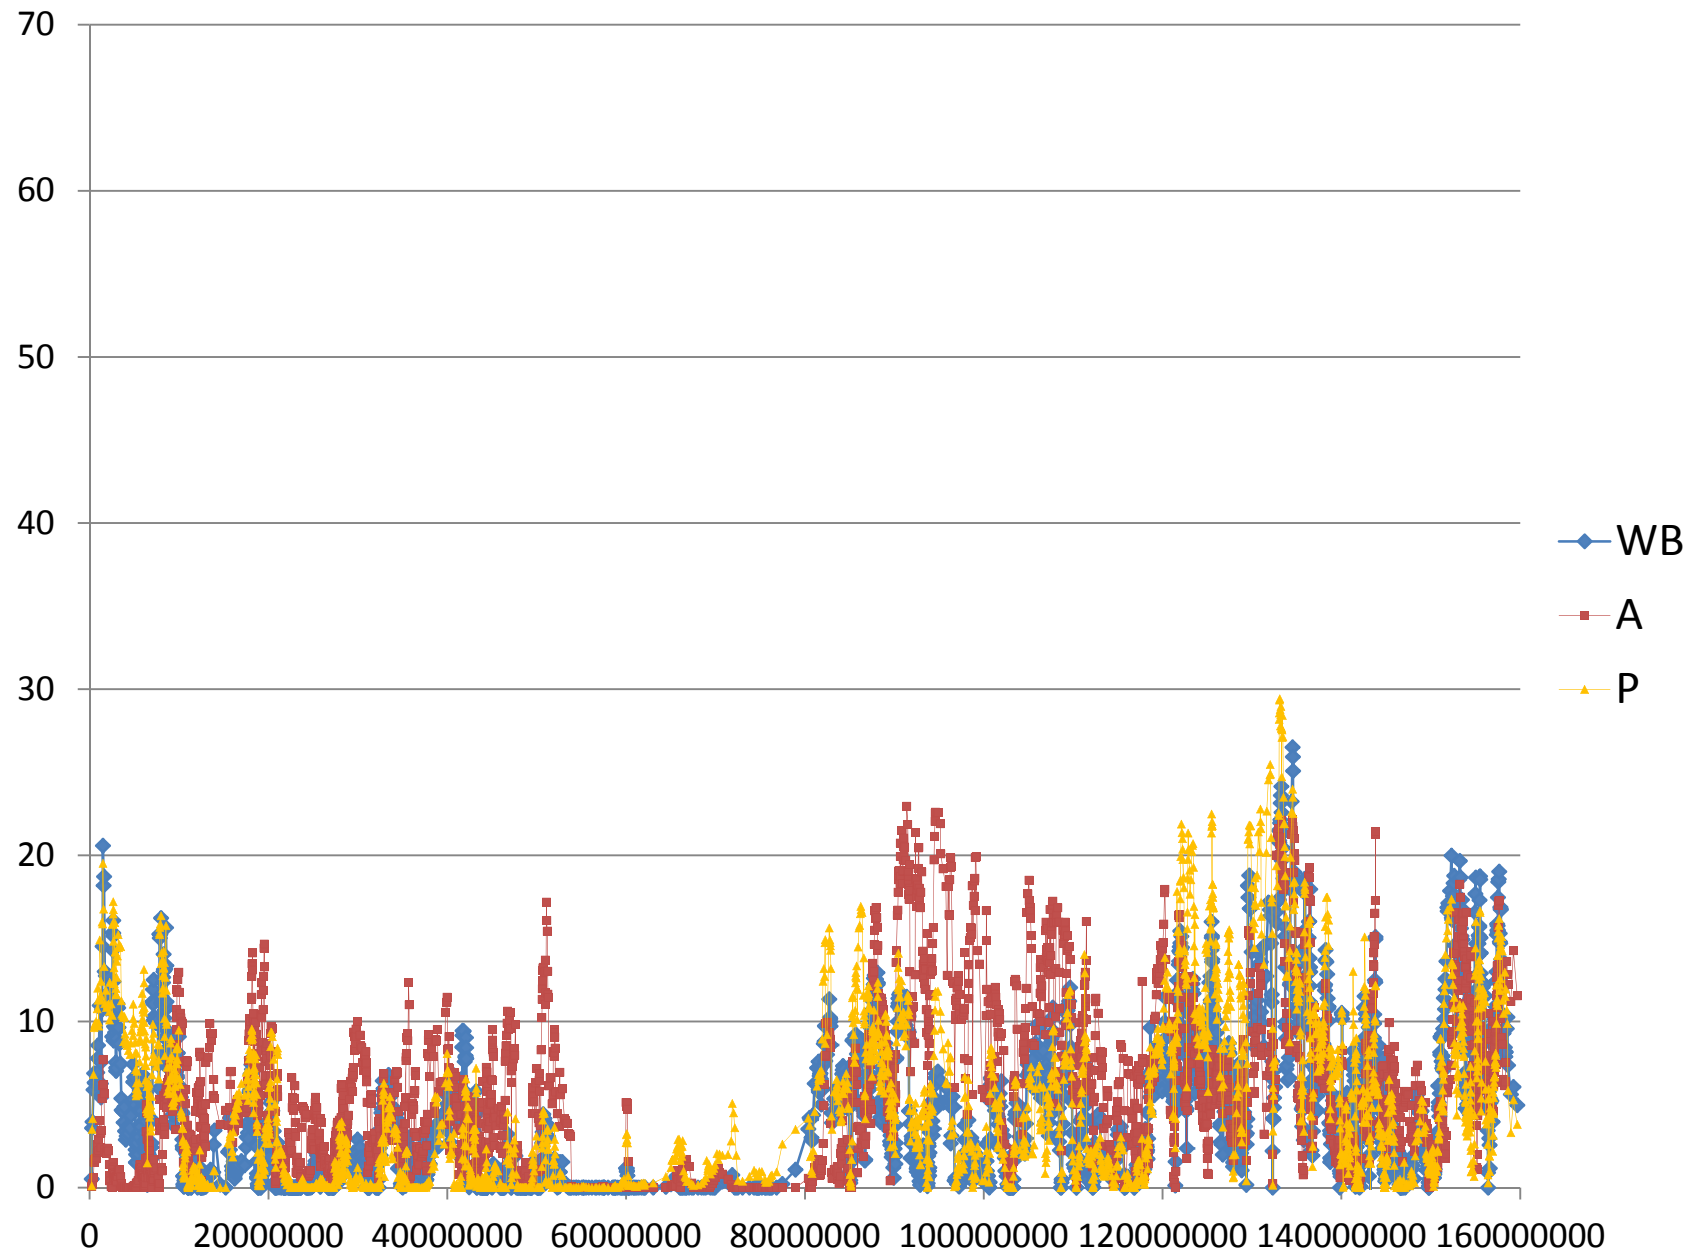

# BMD - Chromosome 3

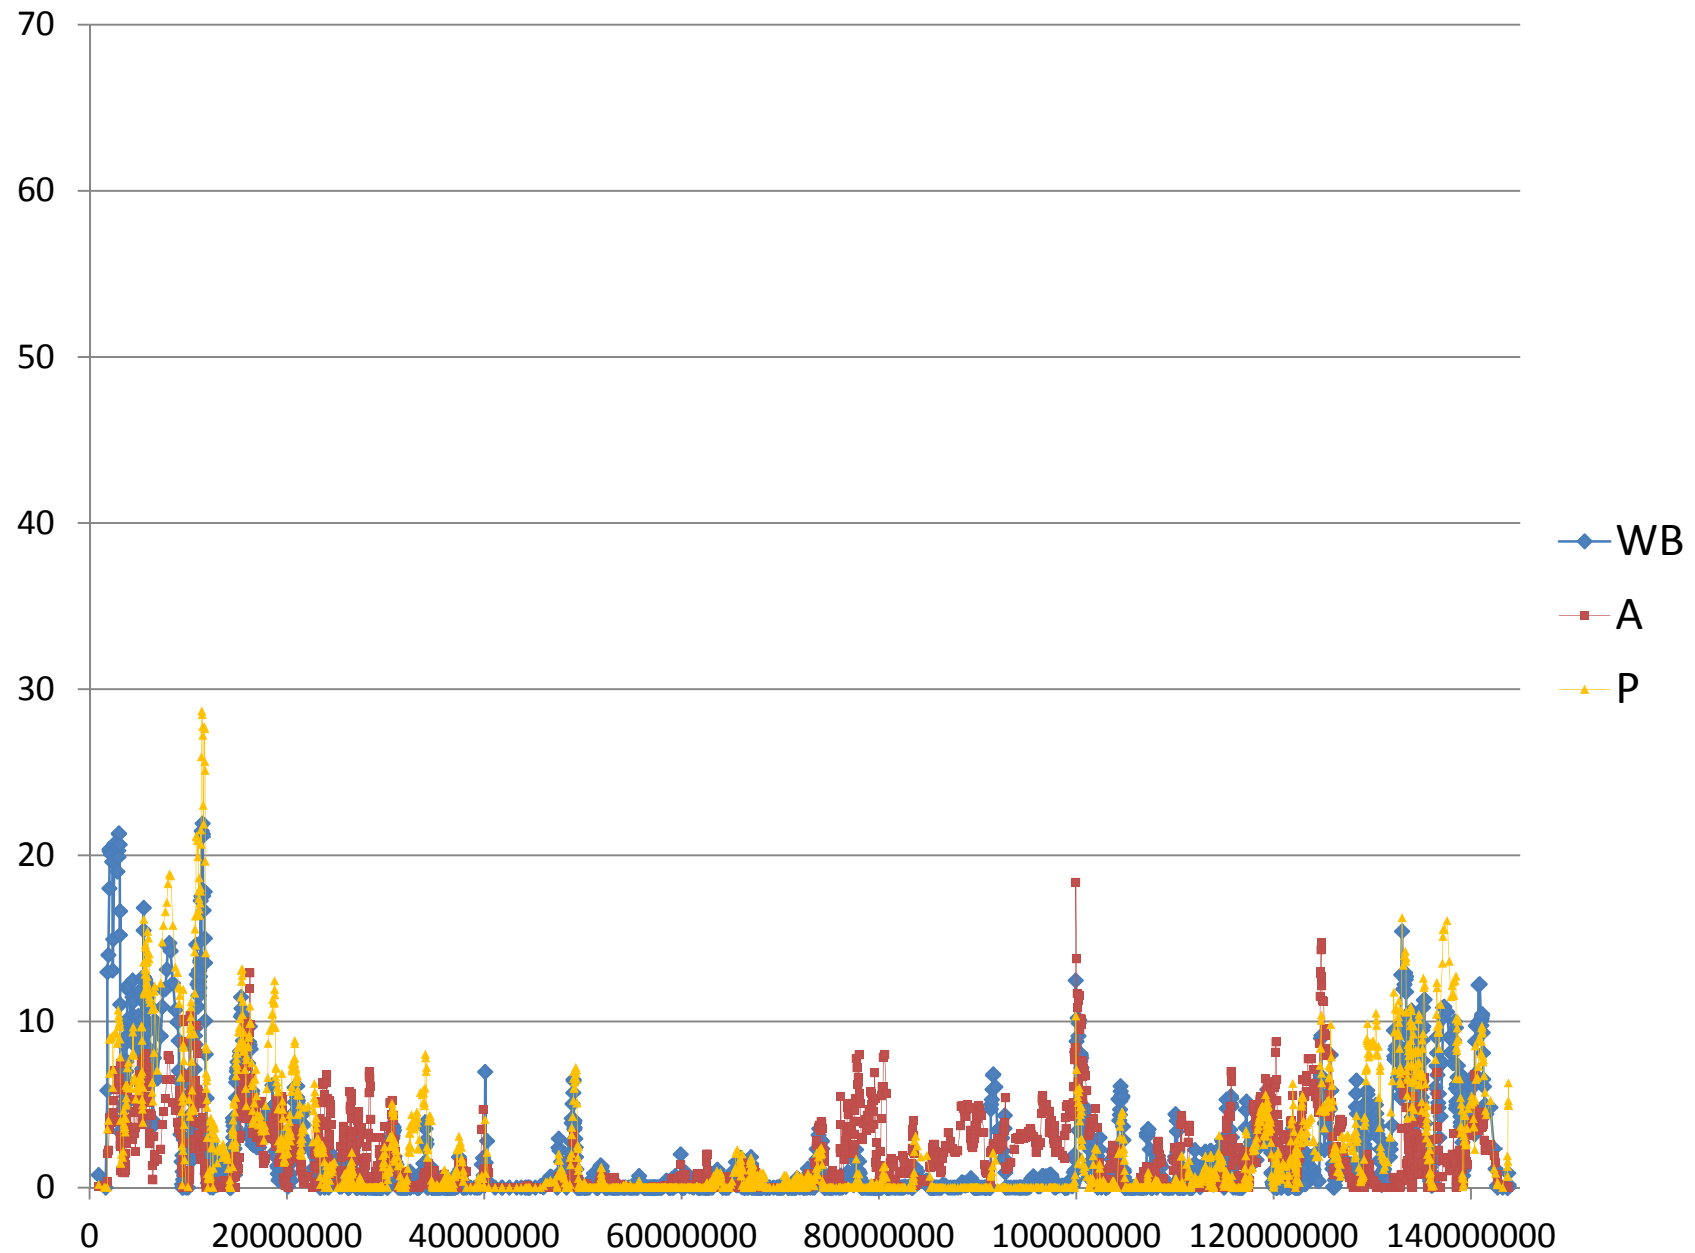

# BMD - Chromosome 4

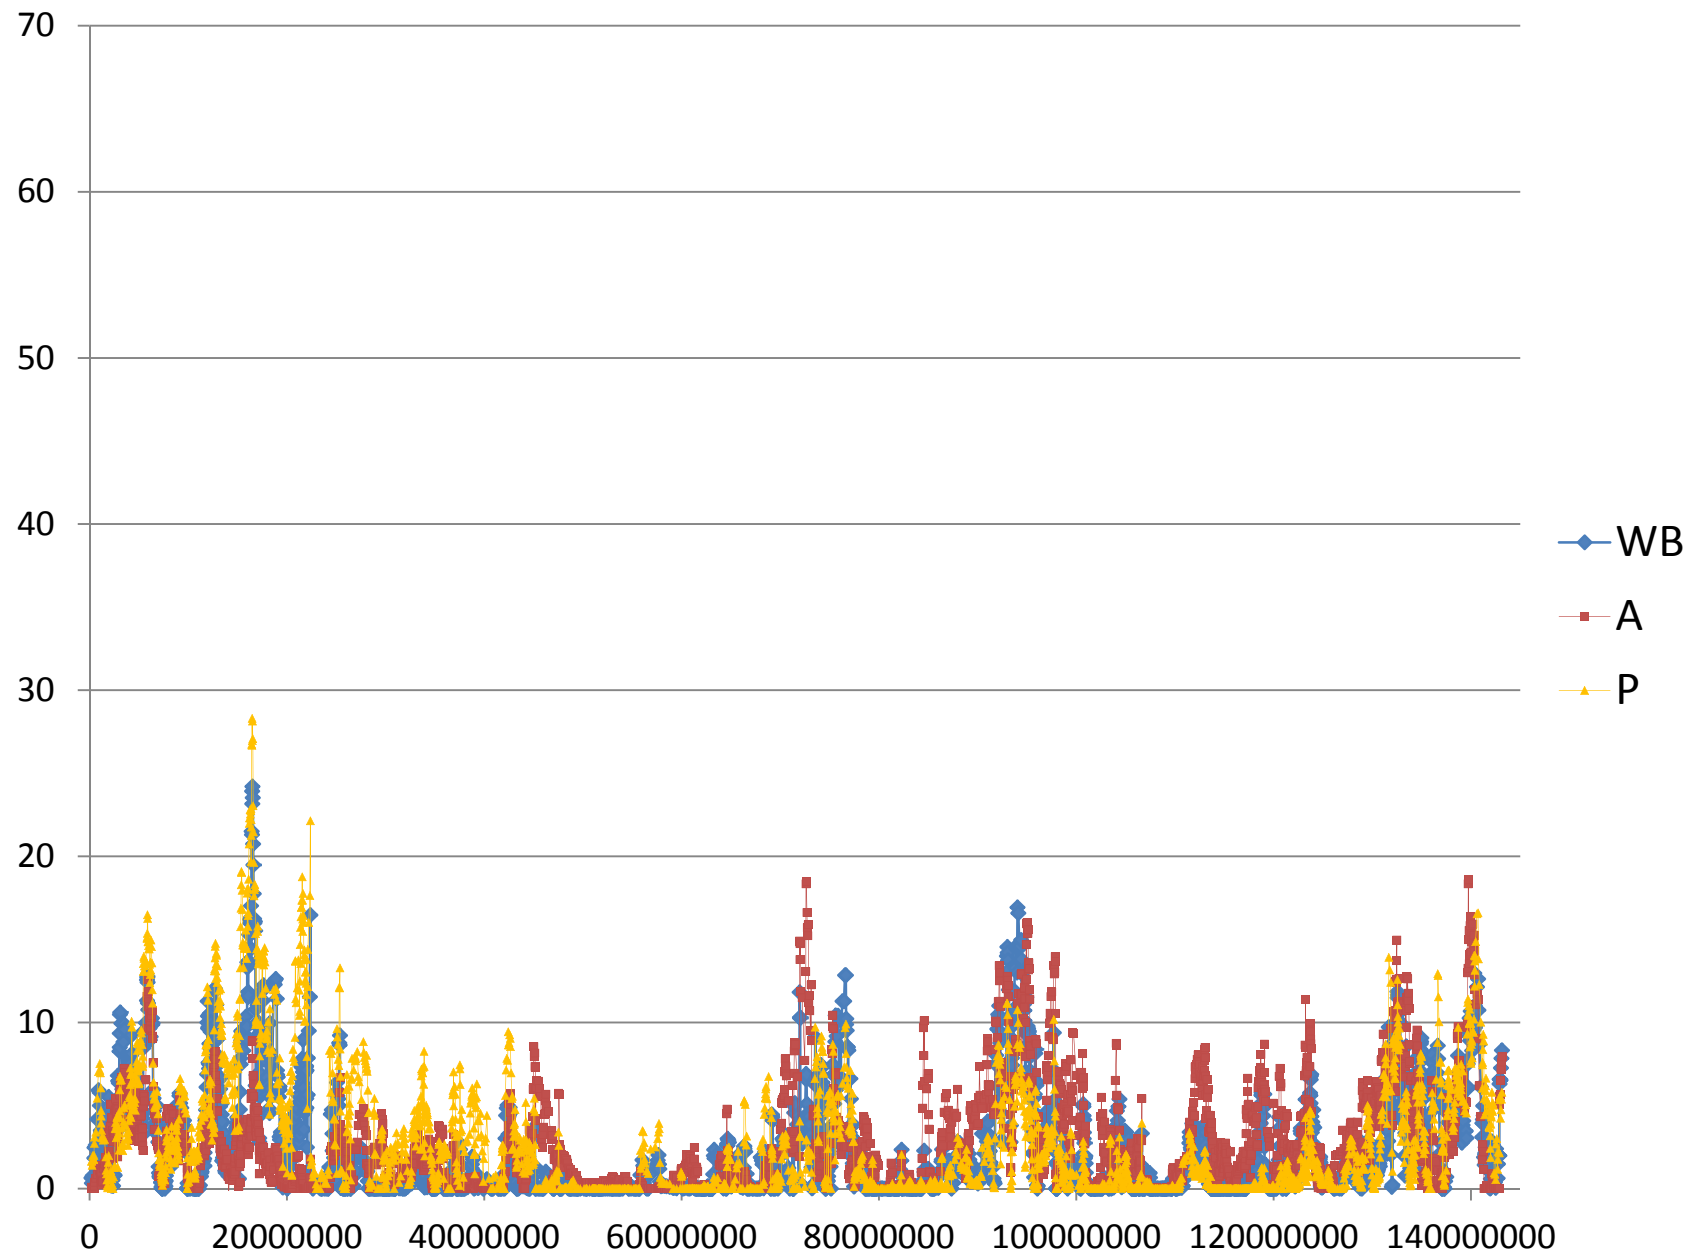

# BMD - Chromosome 5

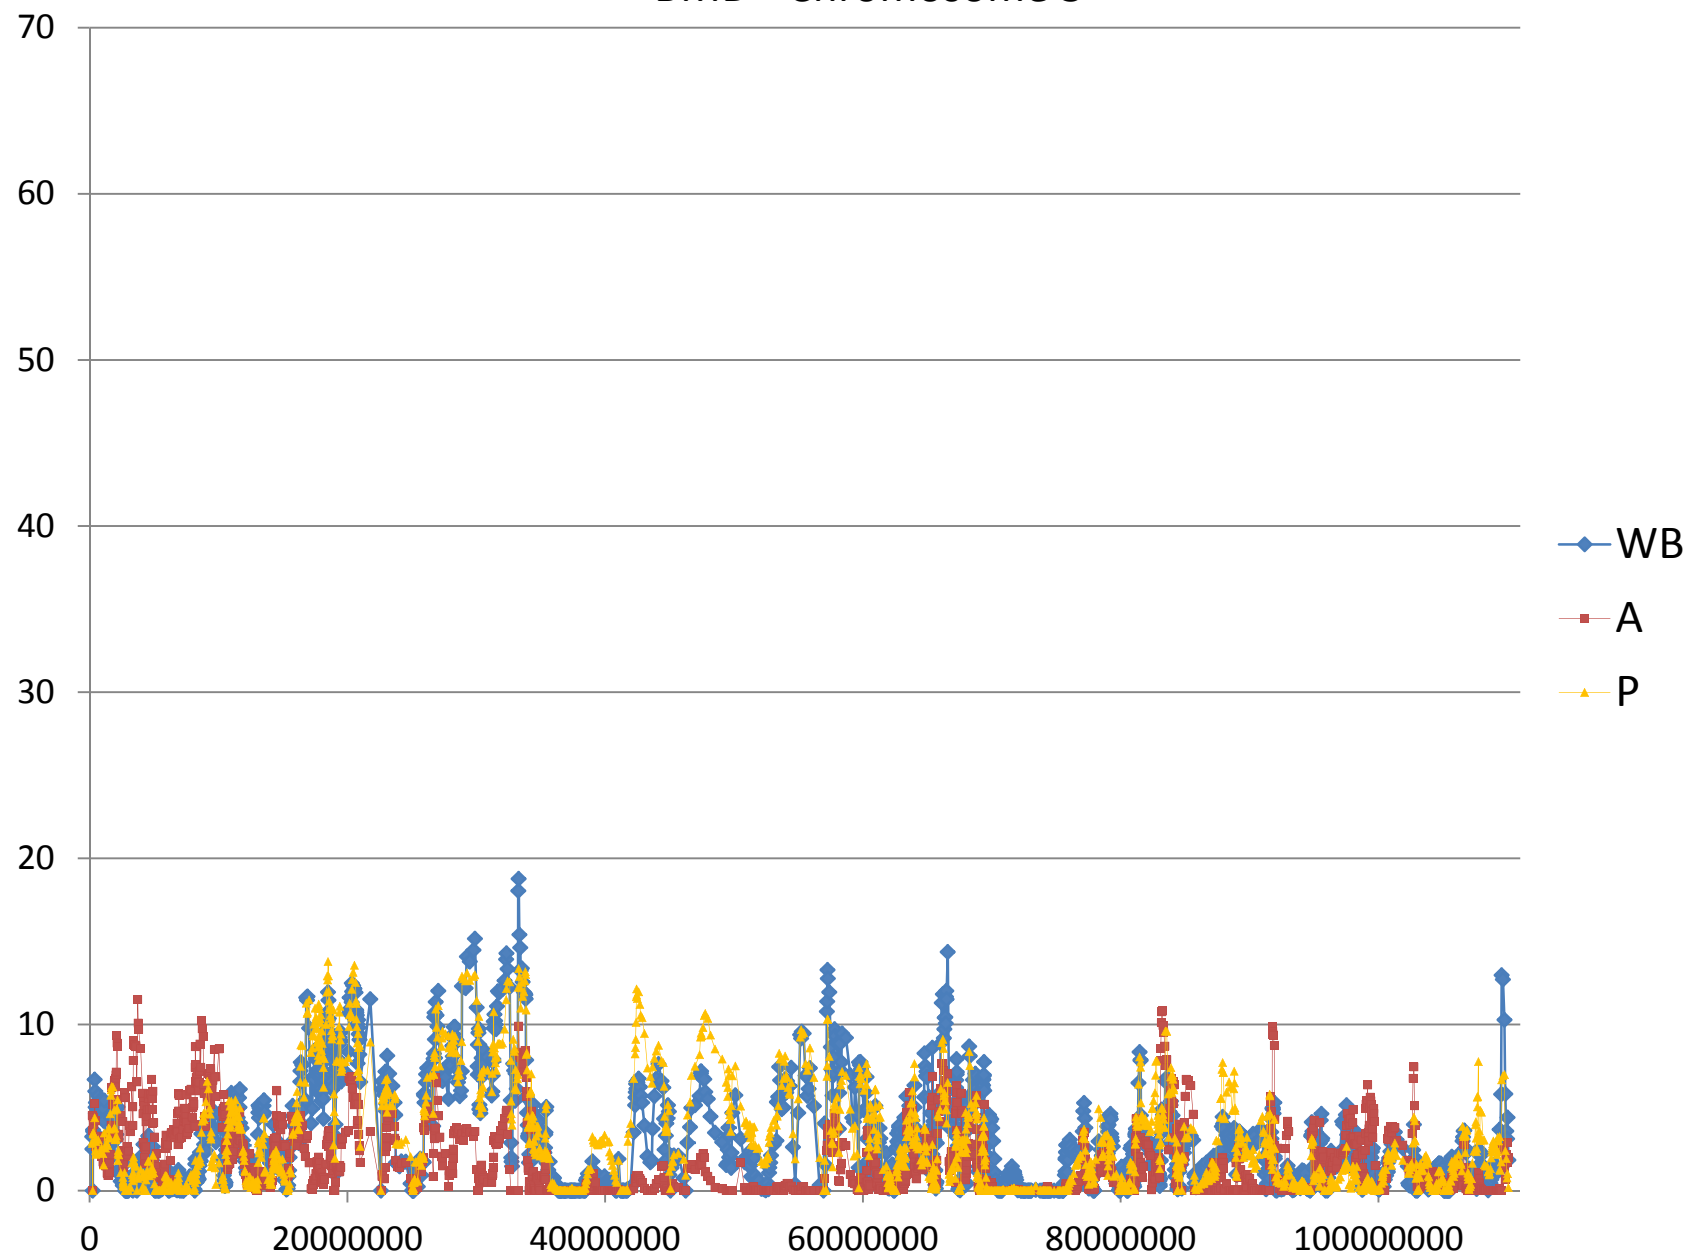

# BMD - Chromosome 6

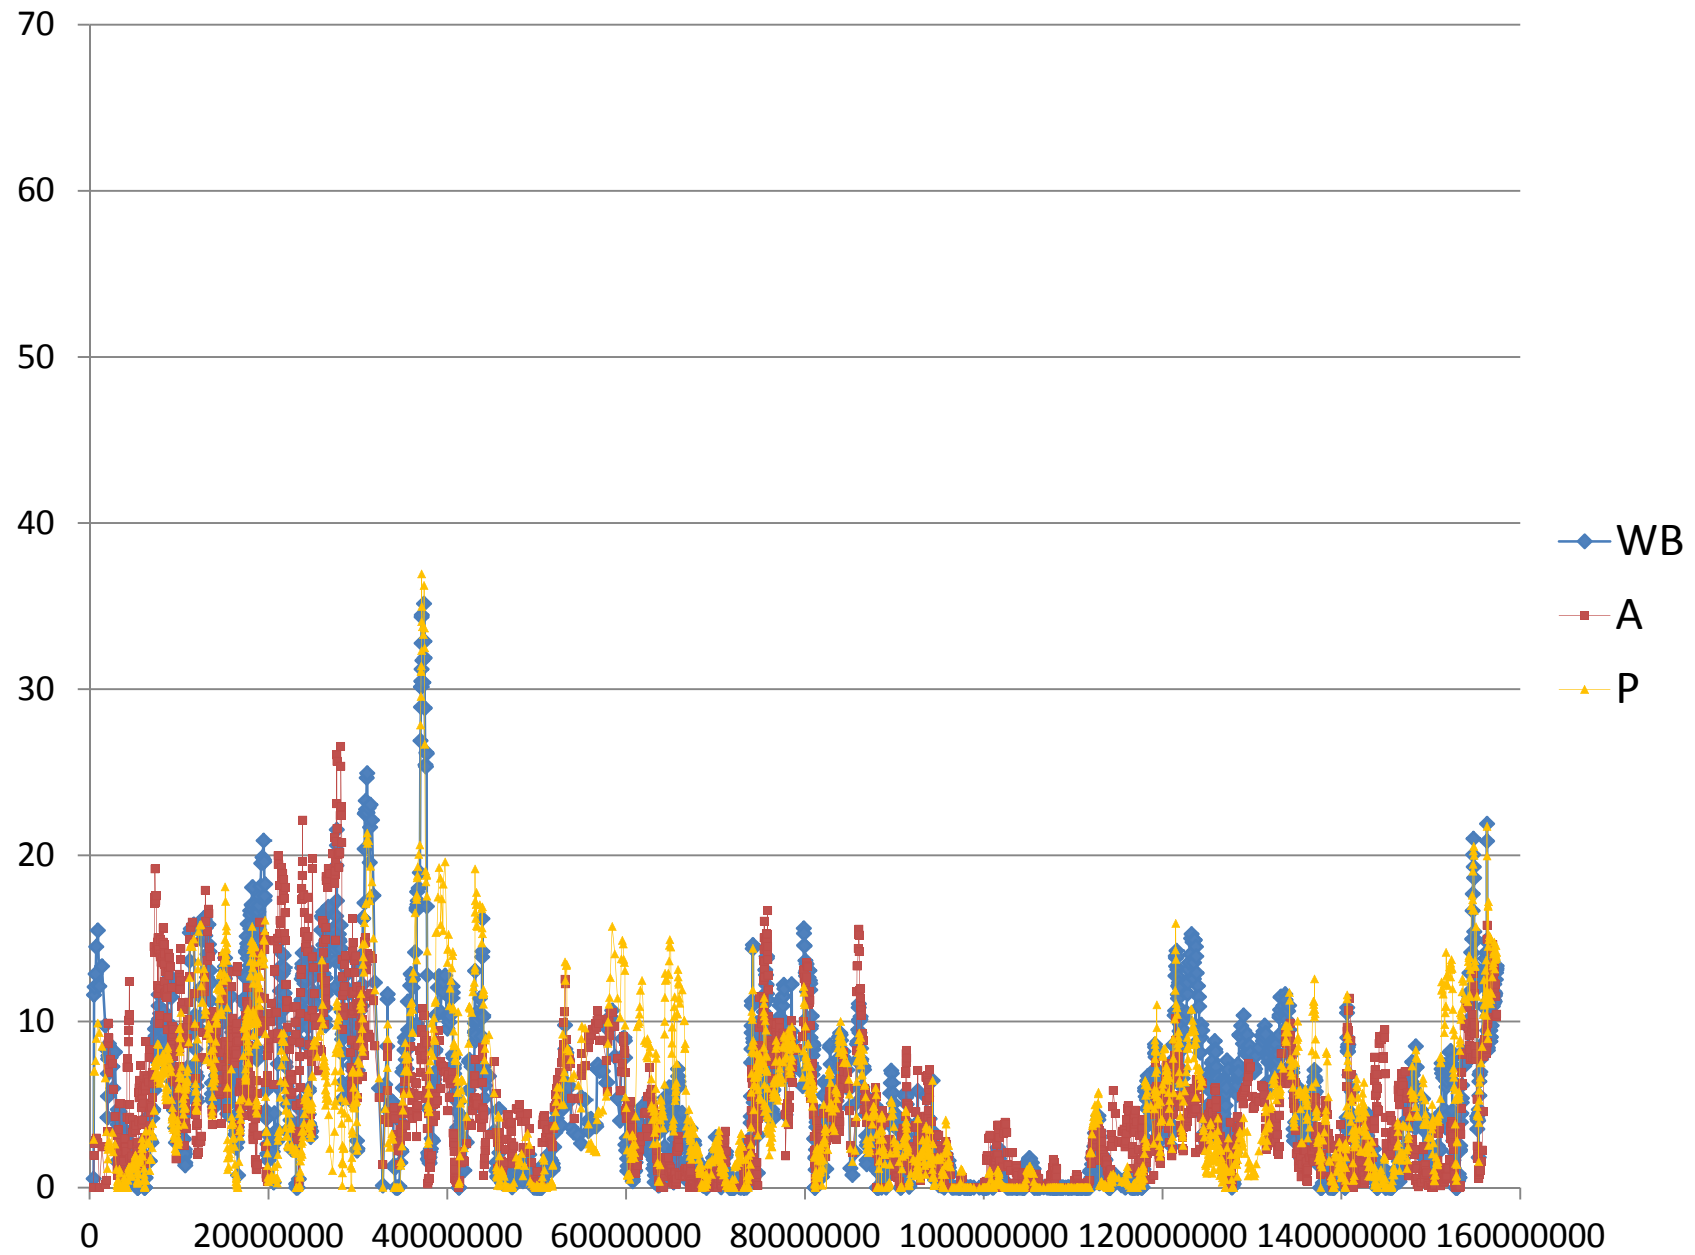

# BMD - Chromosome 7

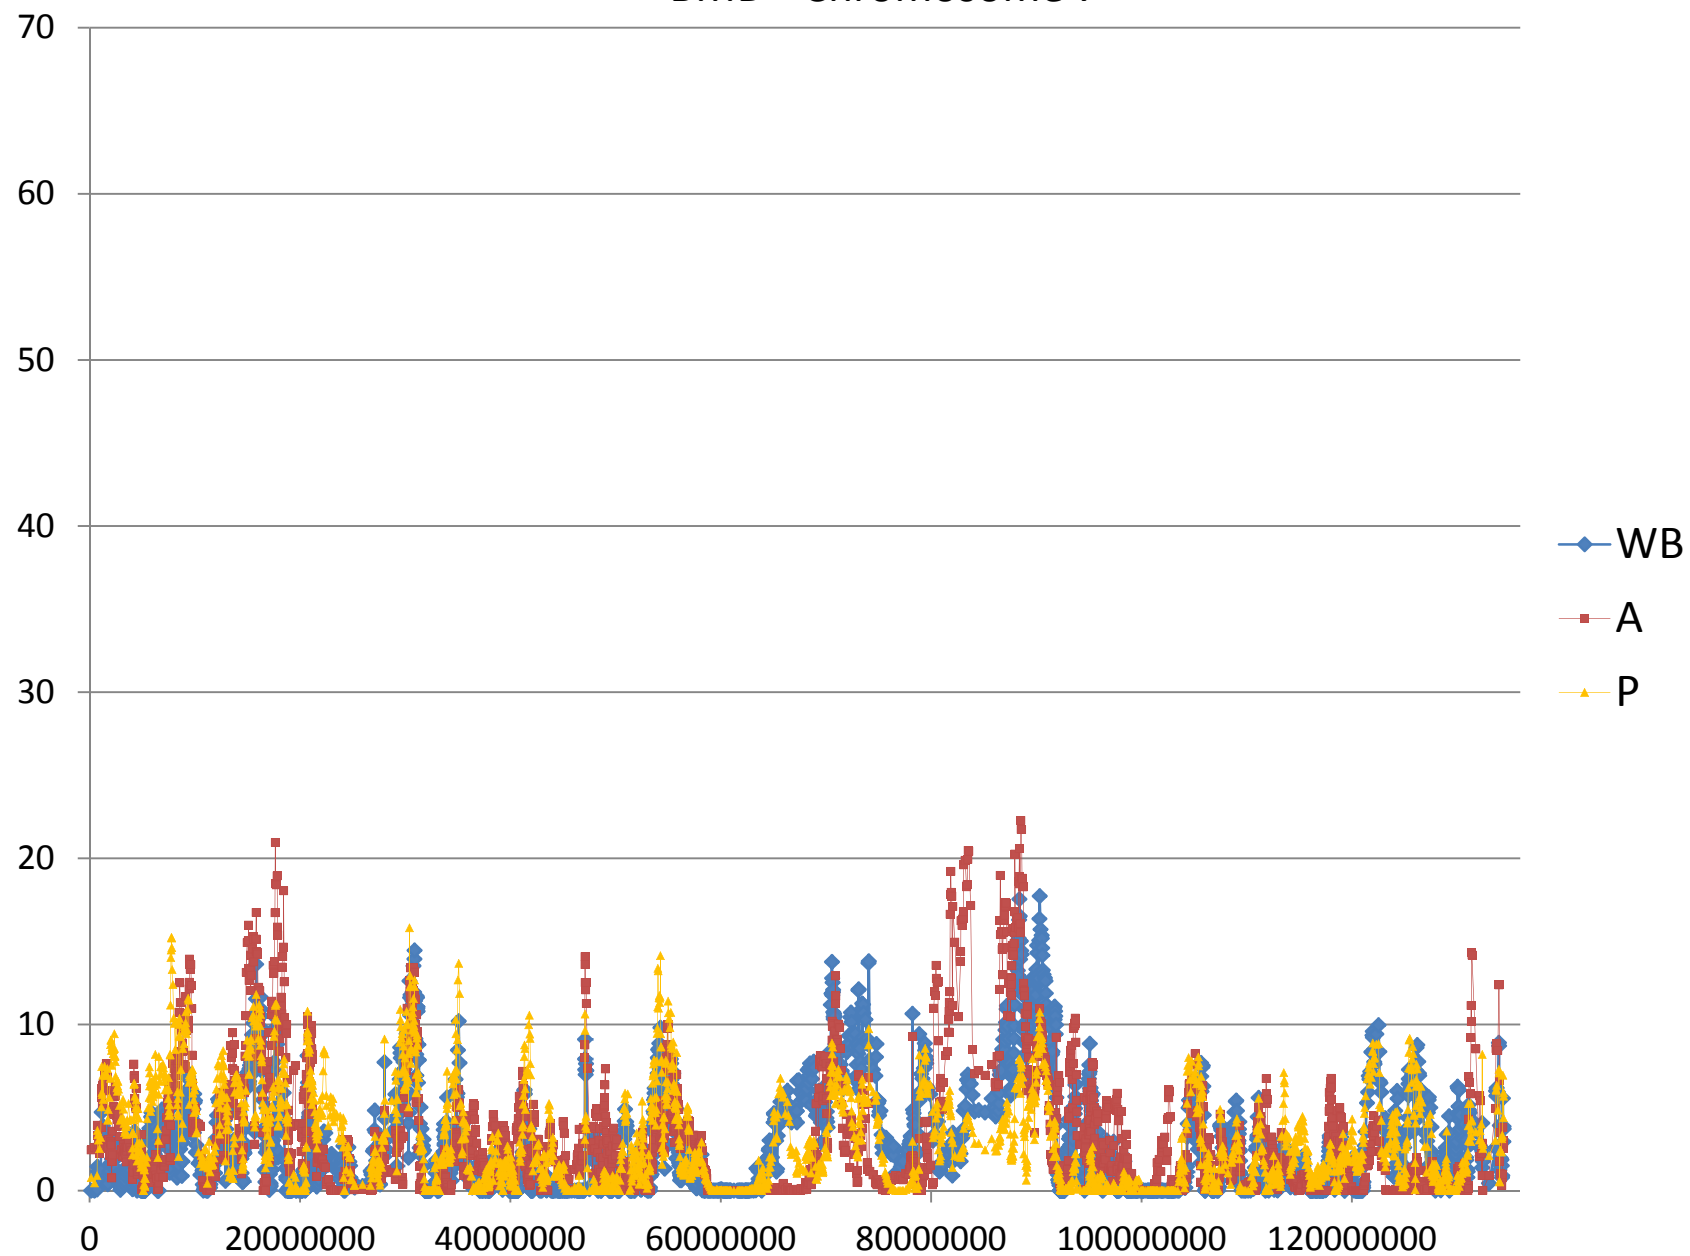

# BMD - Chromosome 8

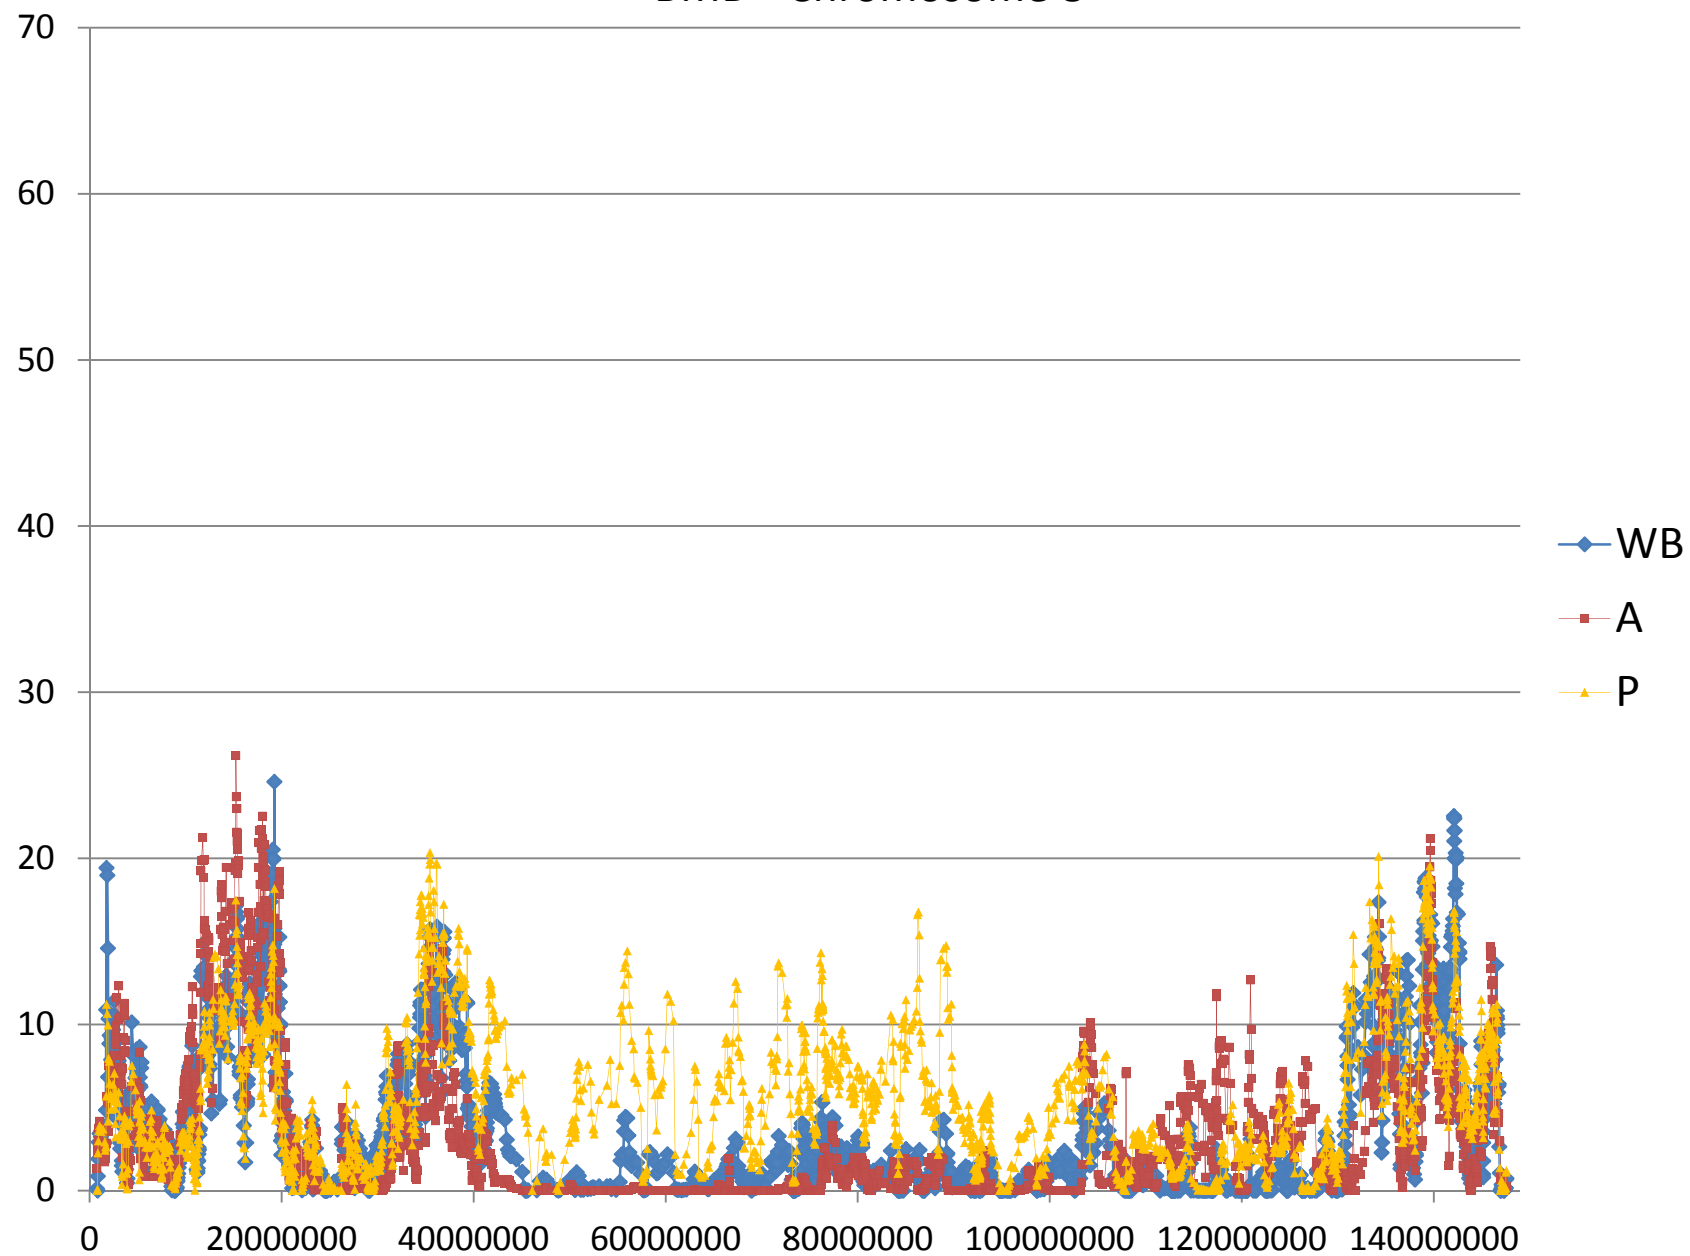



# BMD - Chromosome 9

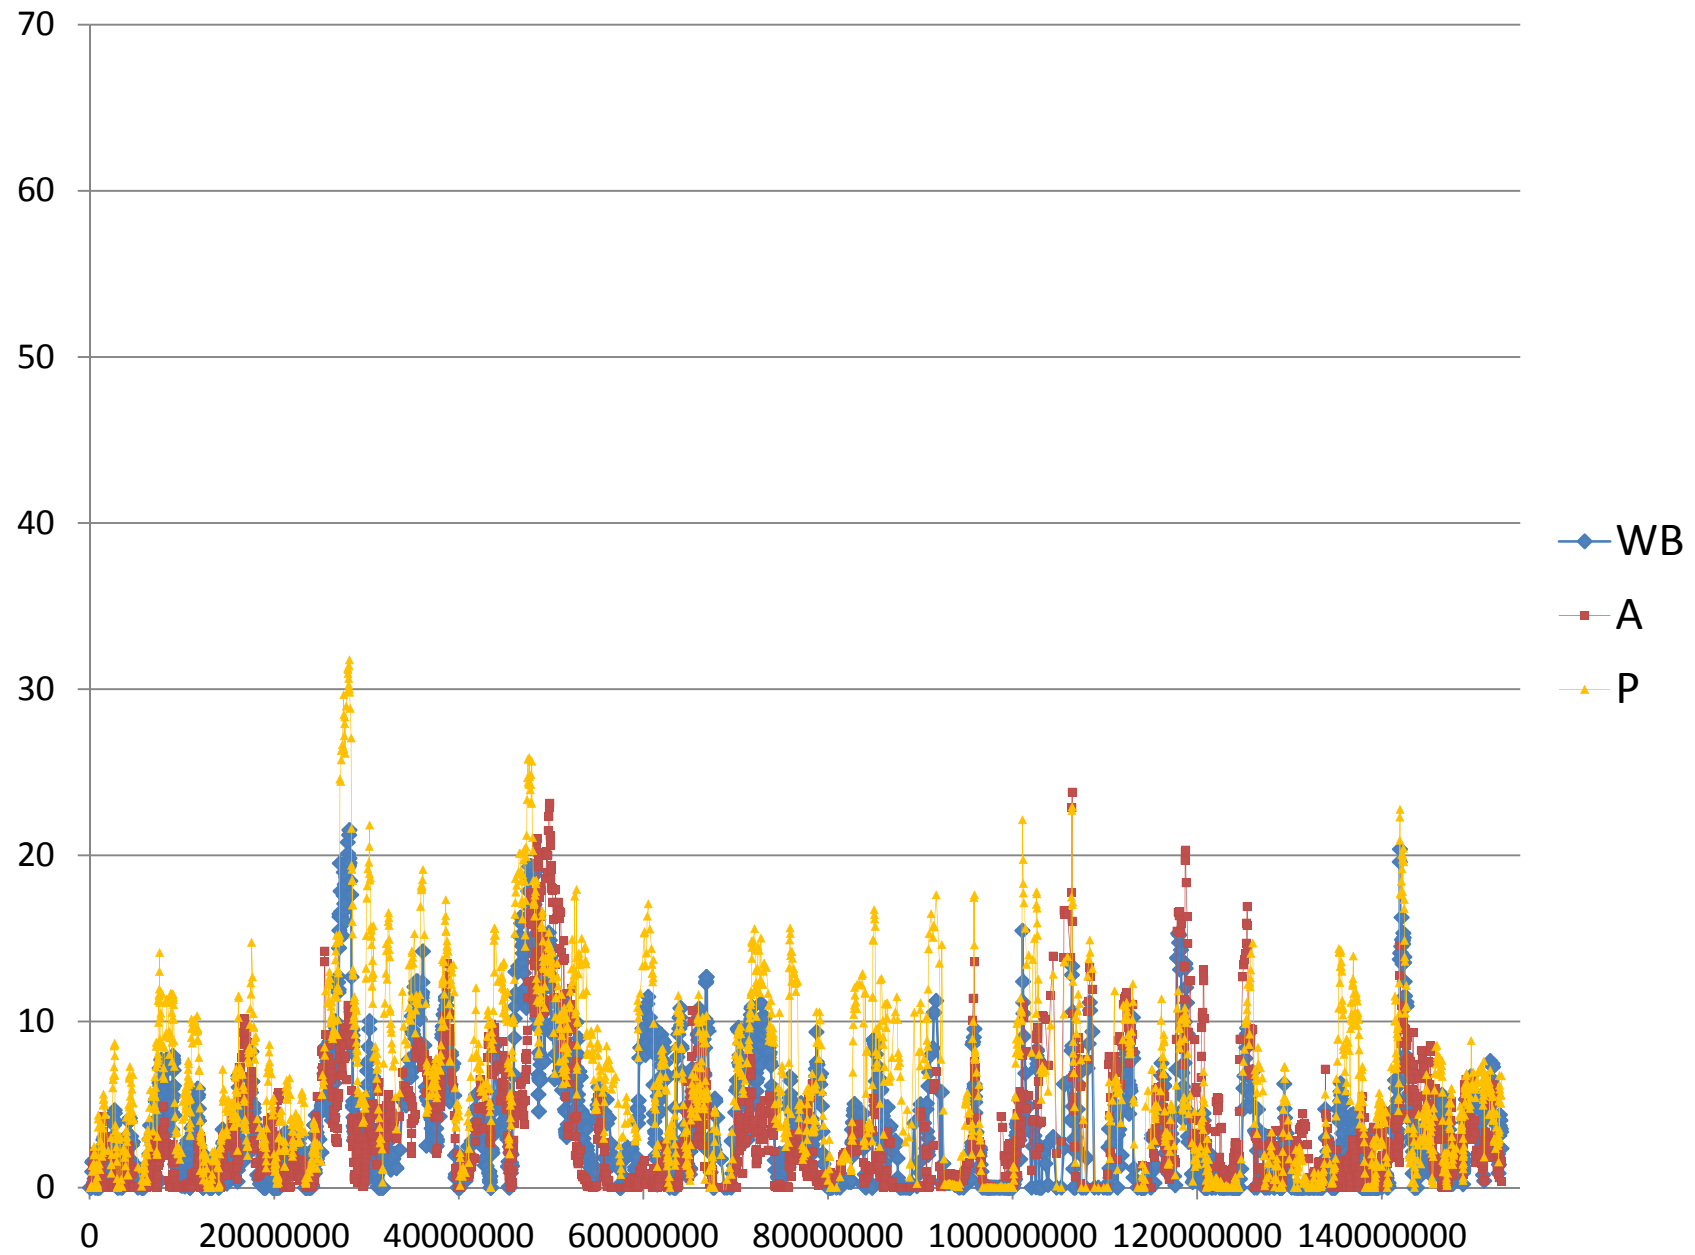

# BMD - Chromosome 10

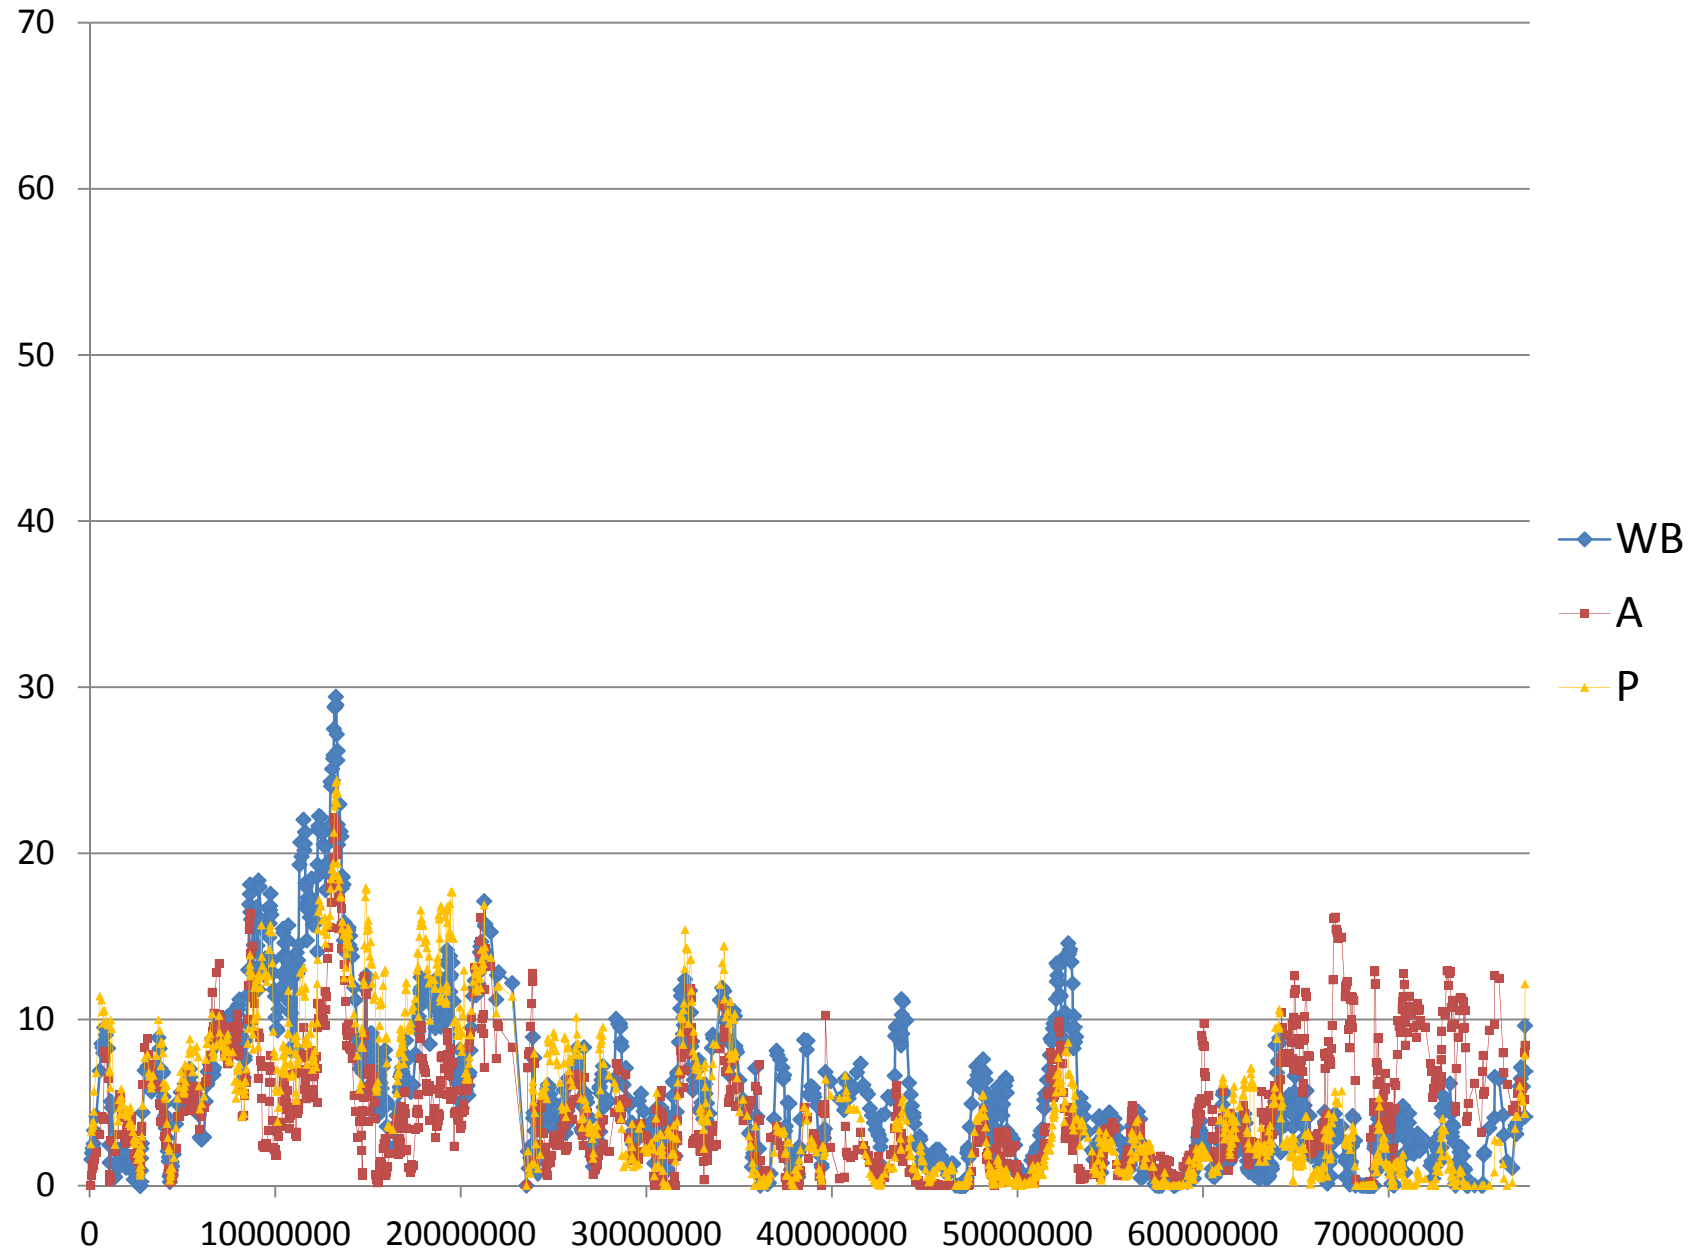

# BMD - Chromosome 11

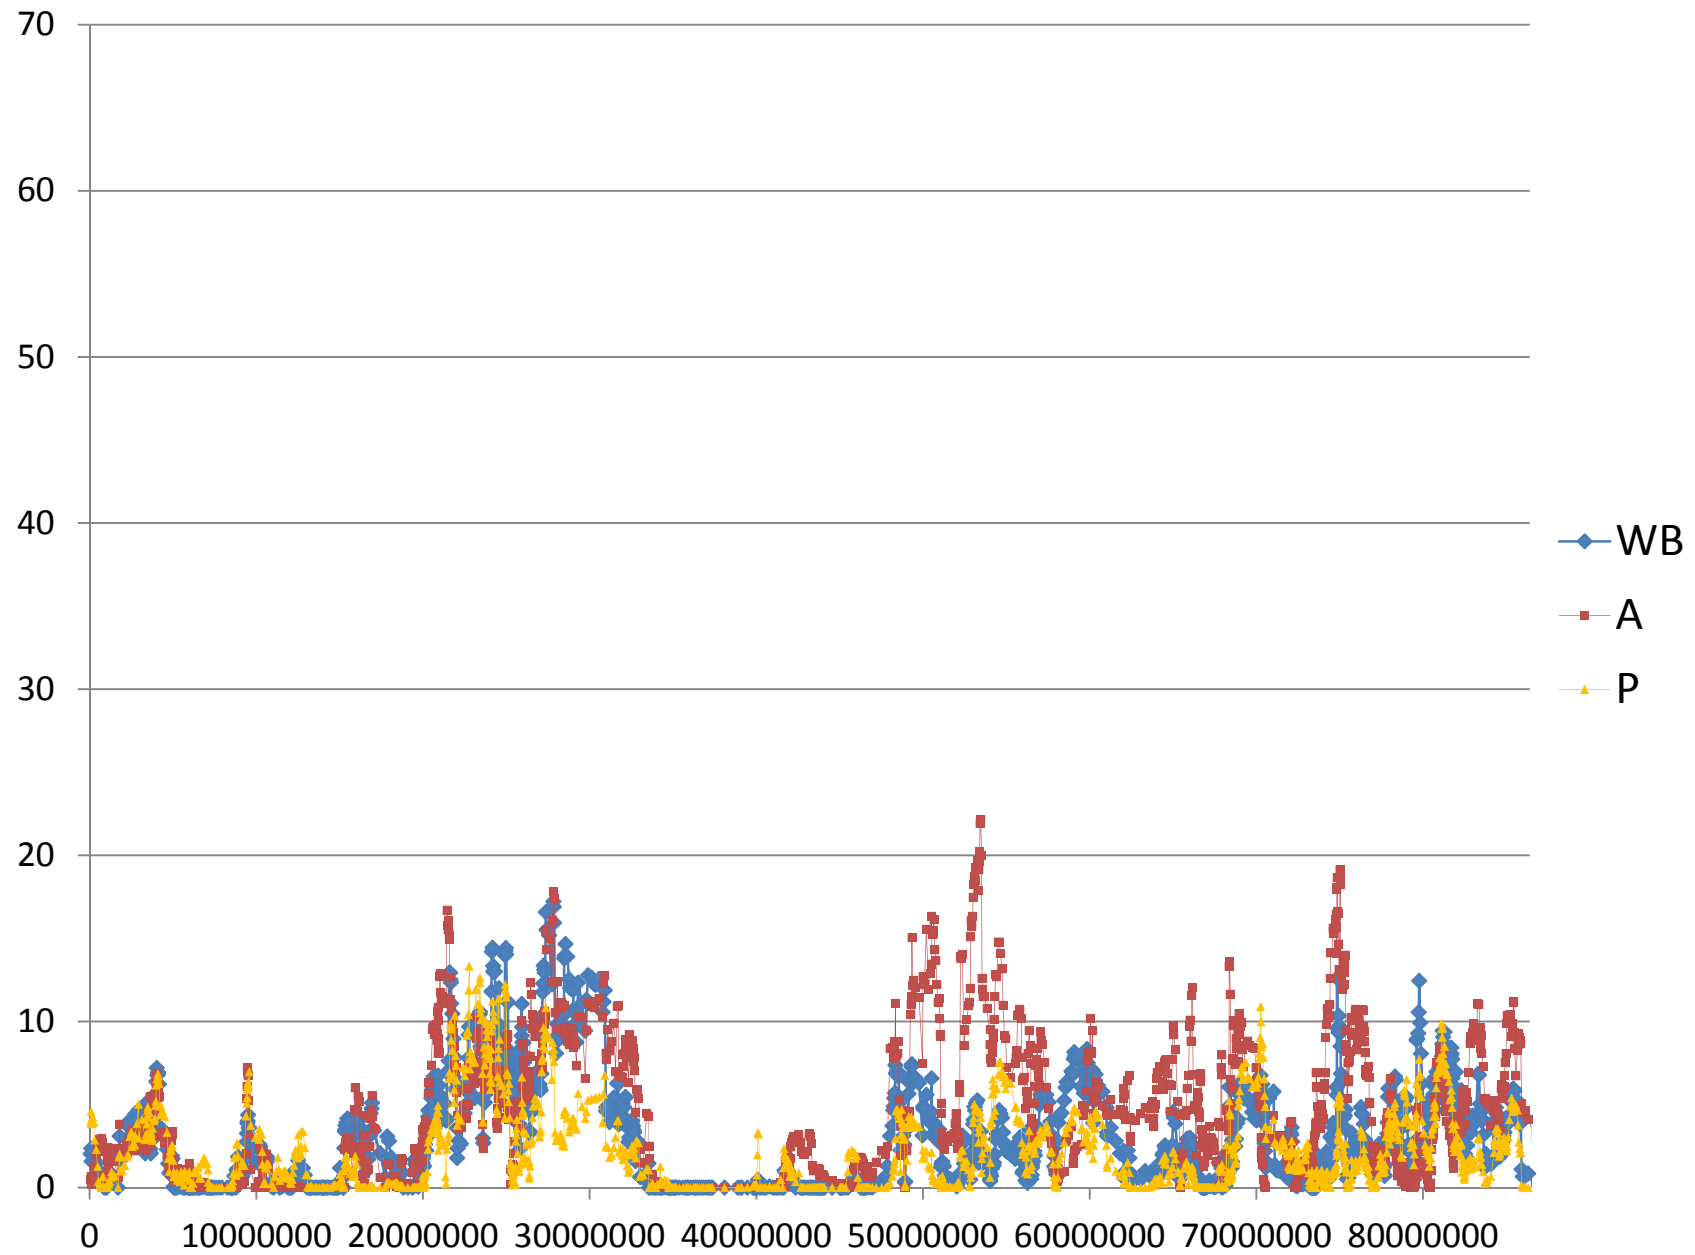

# BMD - Chromosome 12

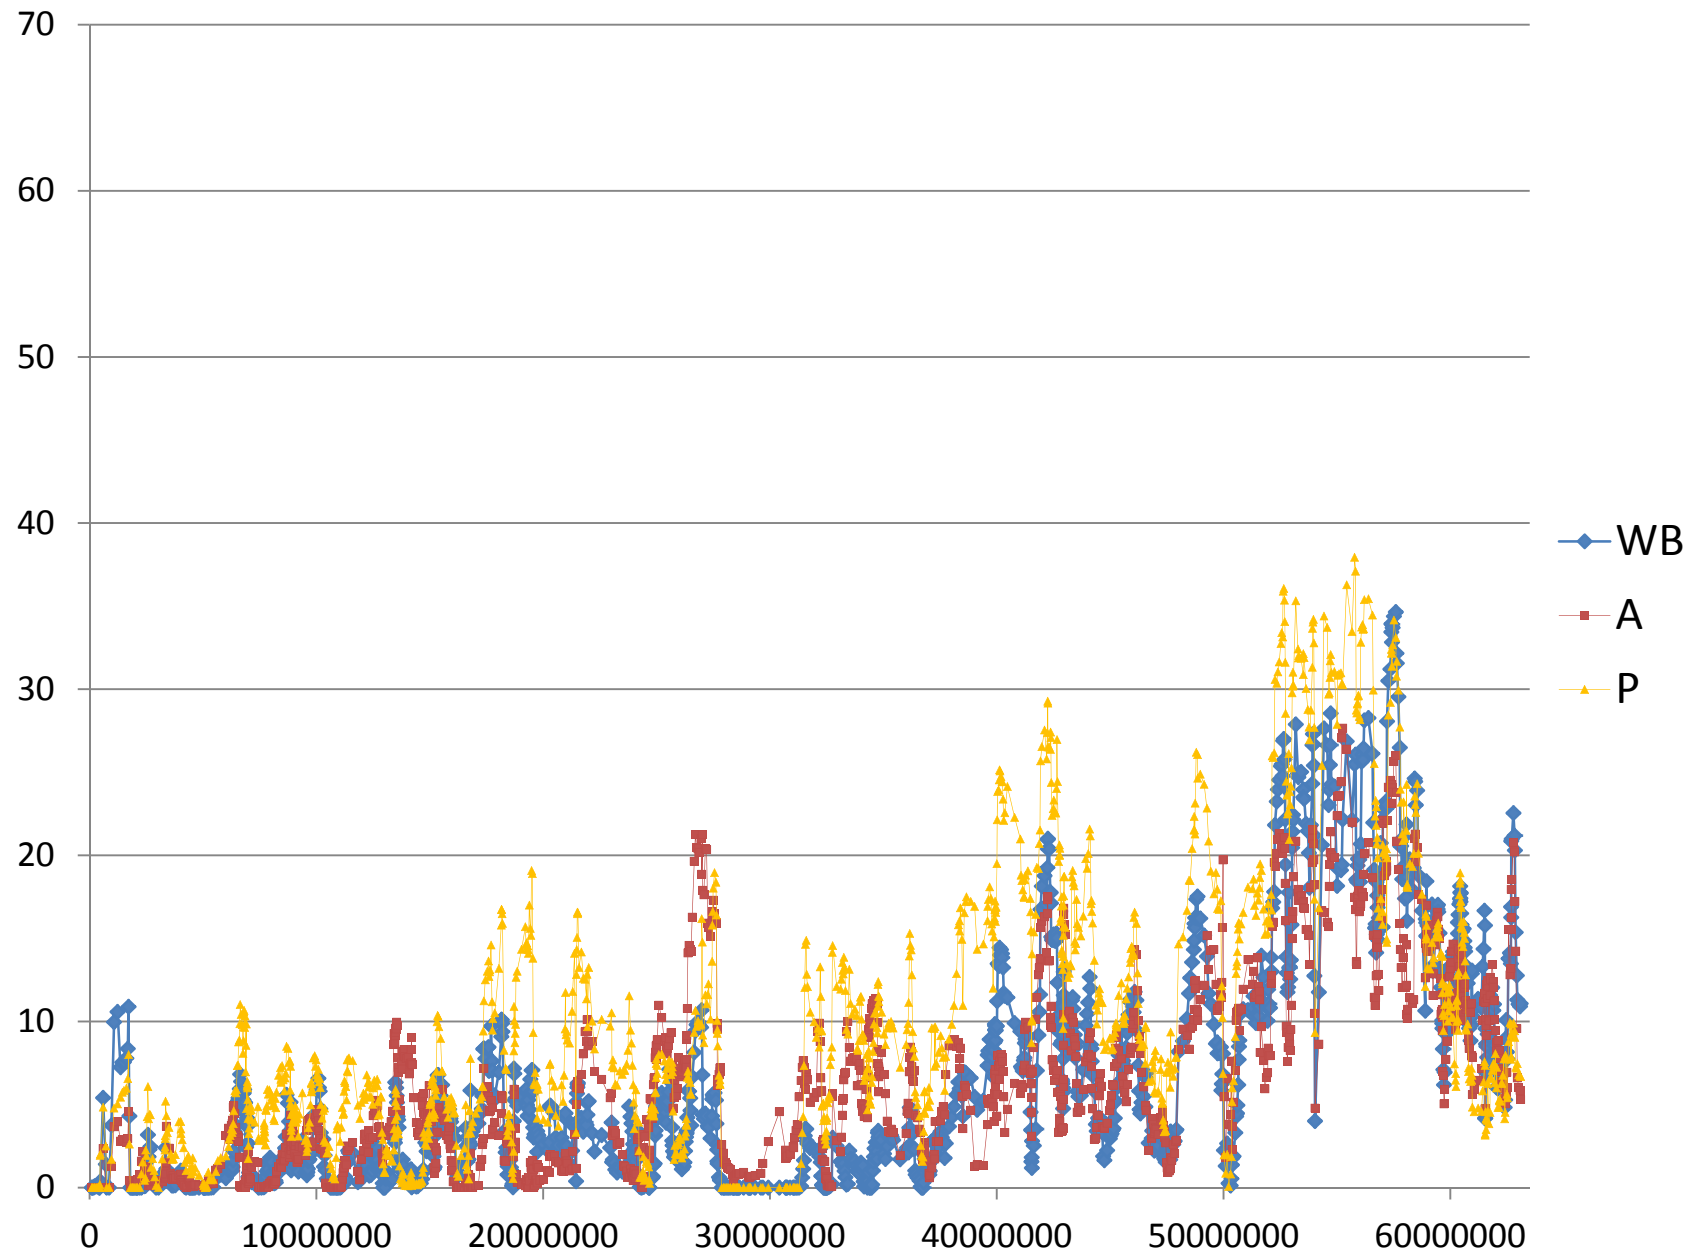

BMD - Chromosome 13

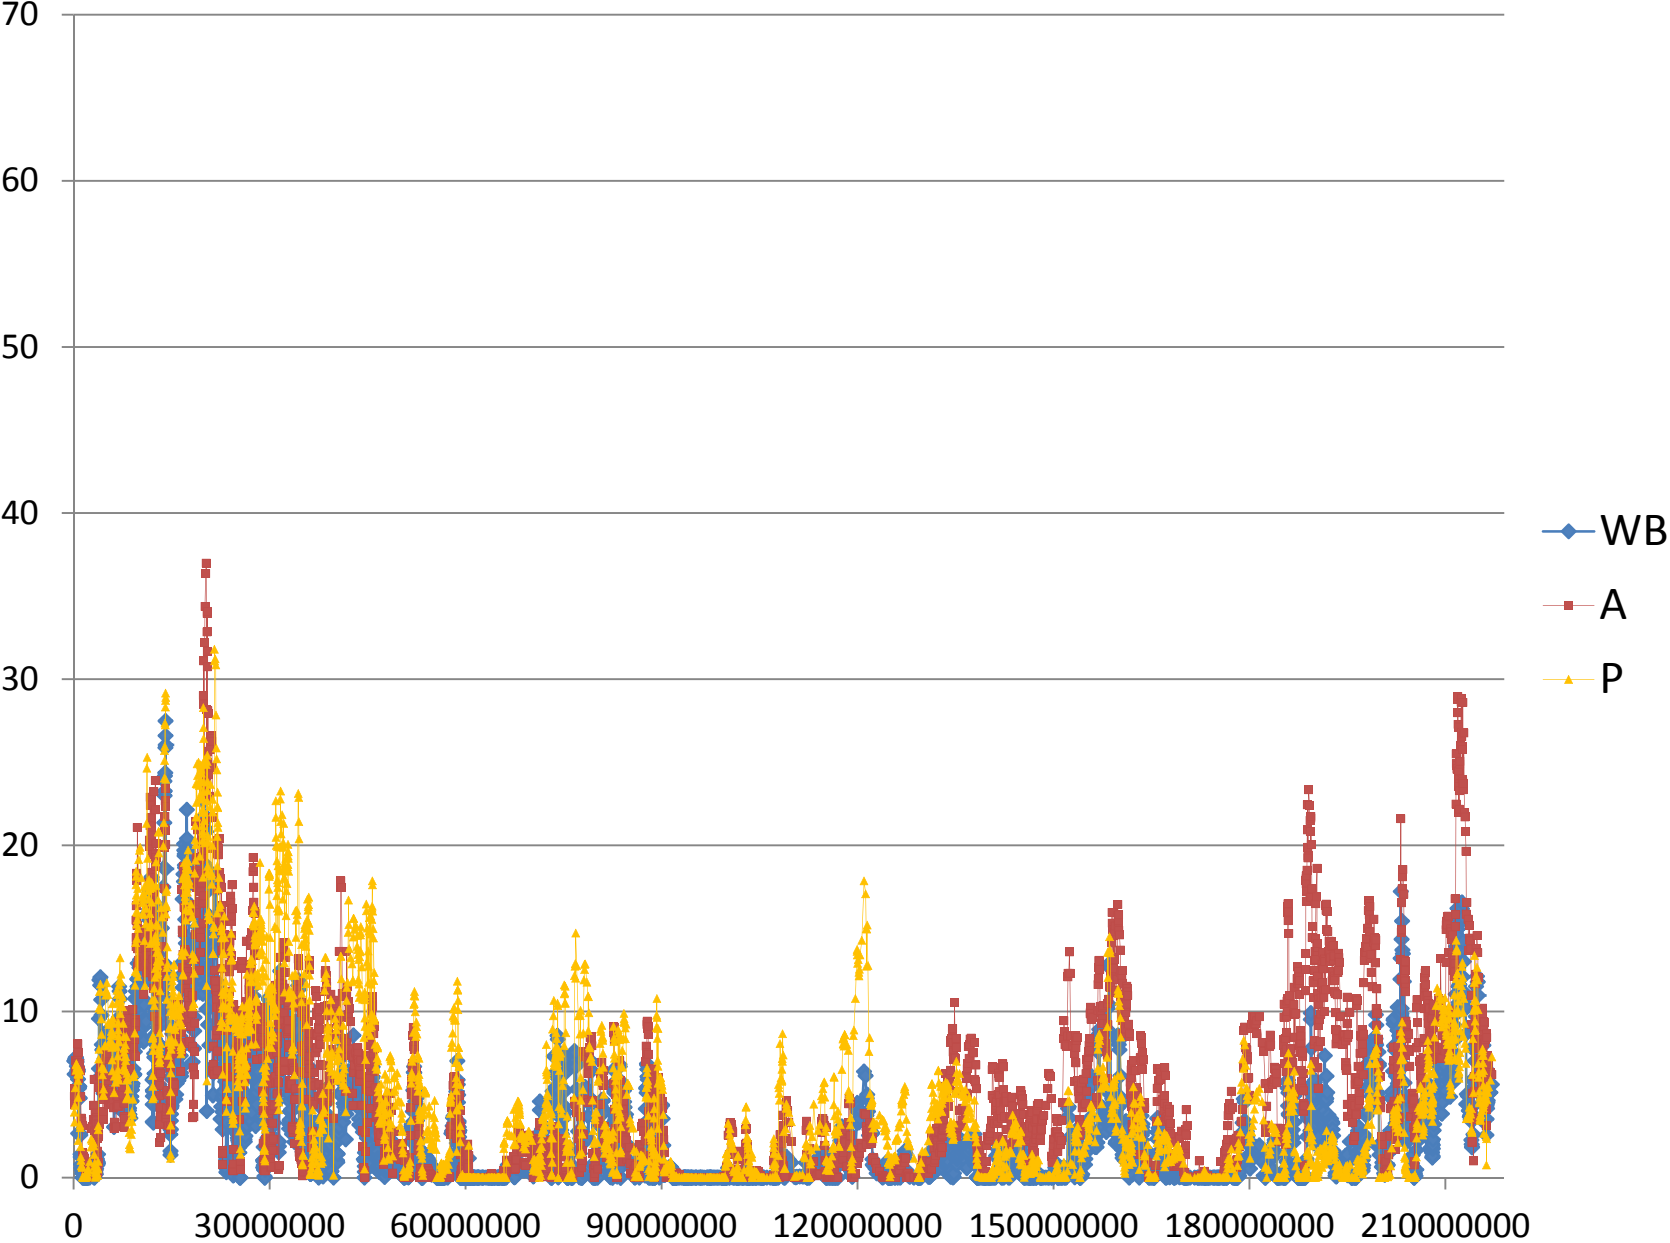

BMD - Chromosome 14

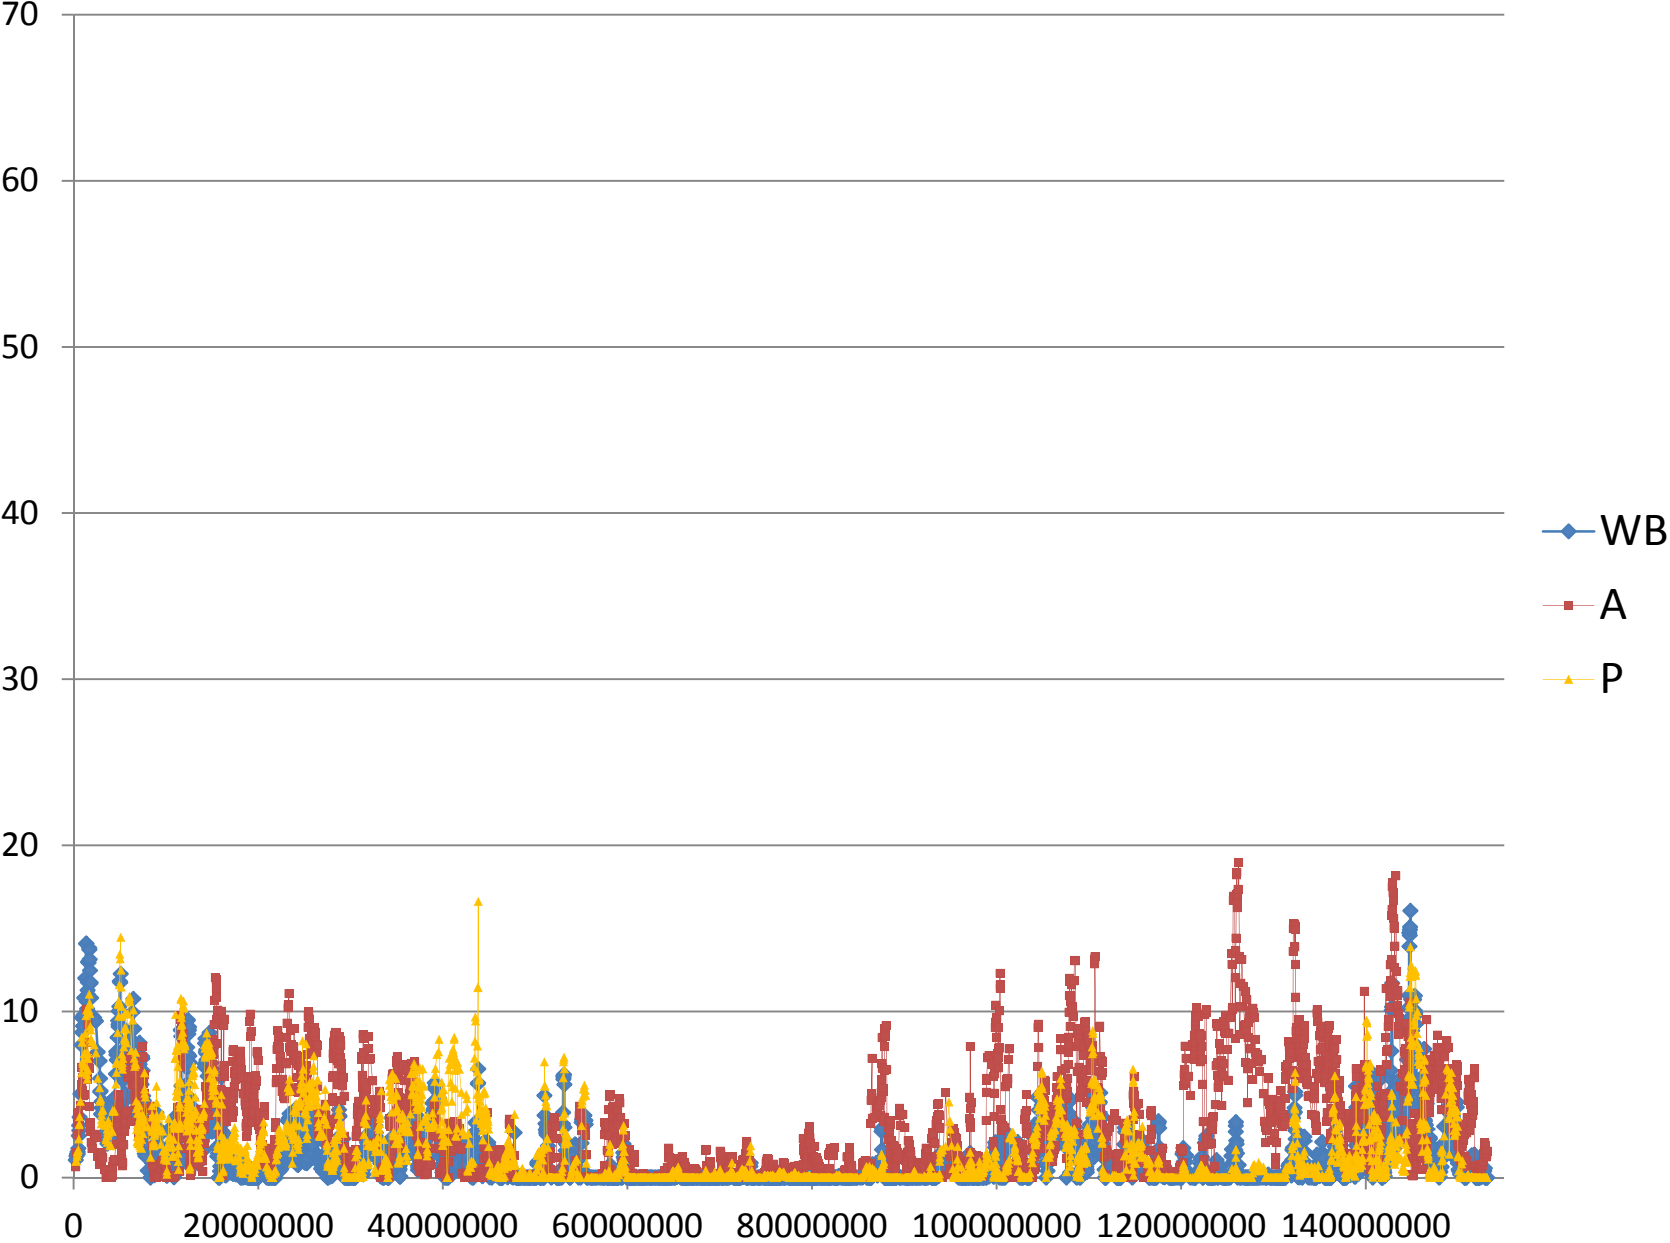

# BMD - Chromosome 15

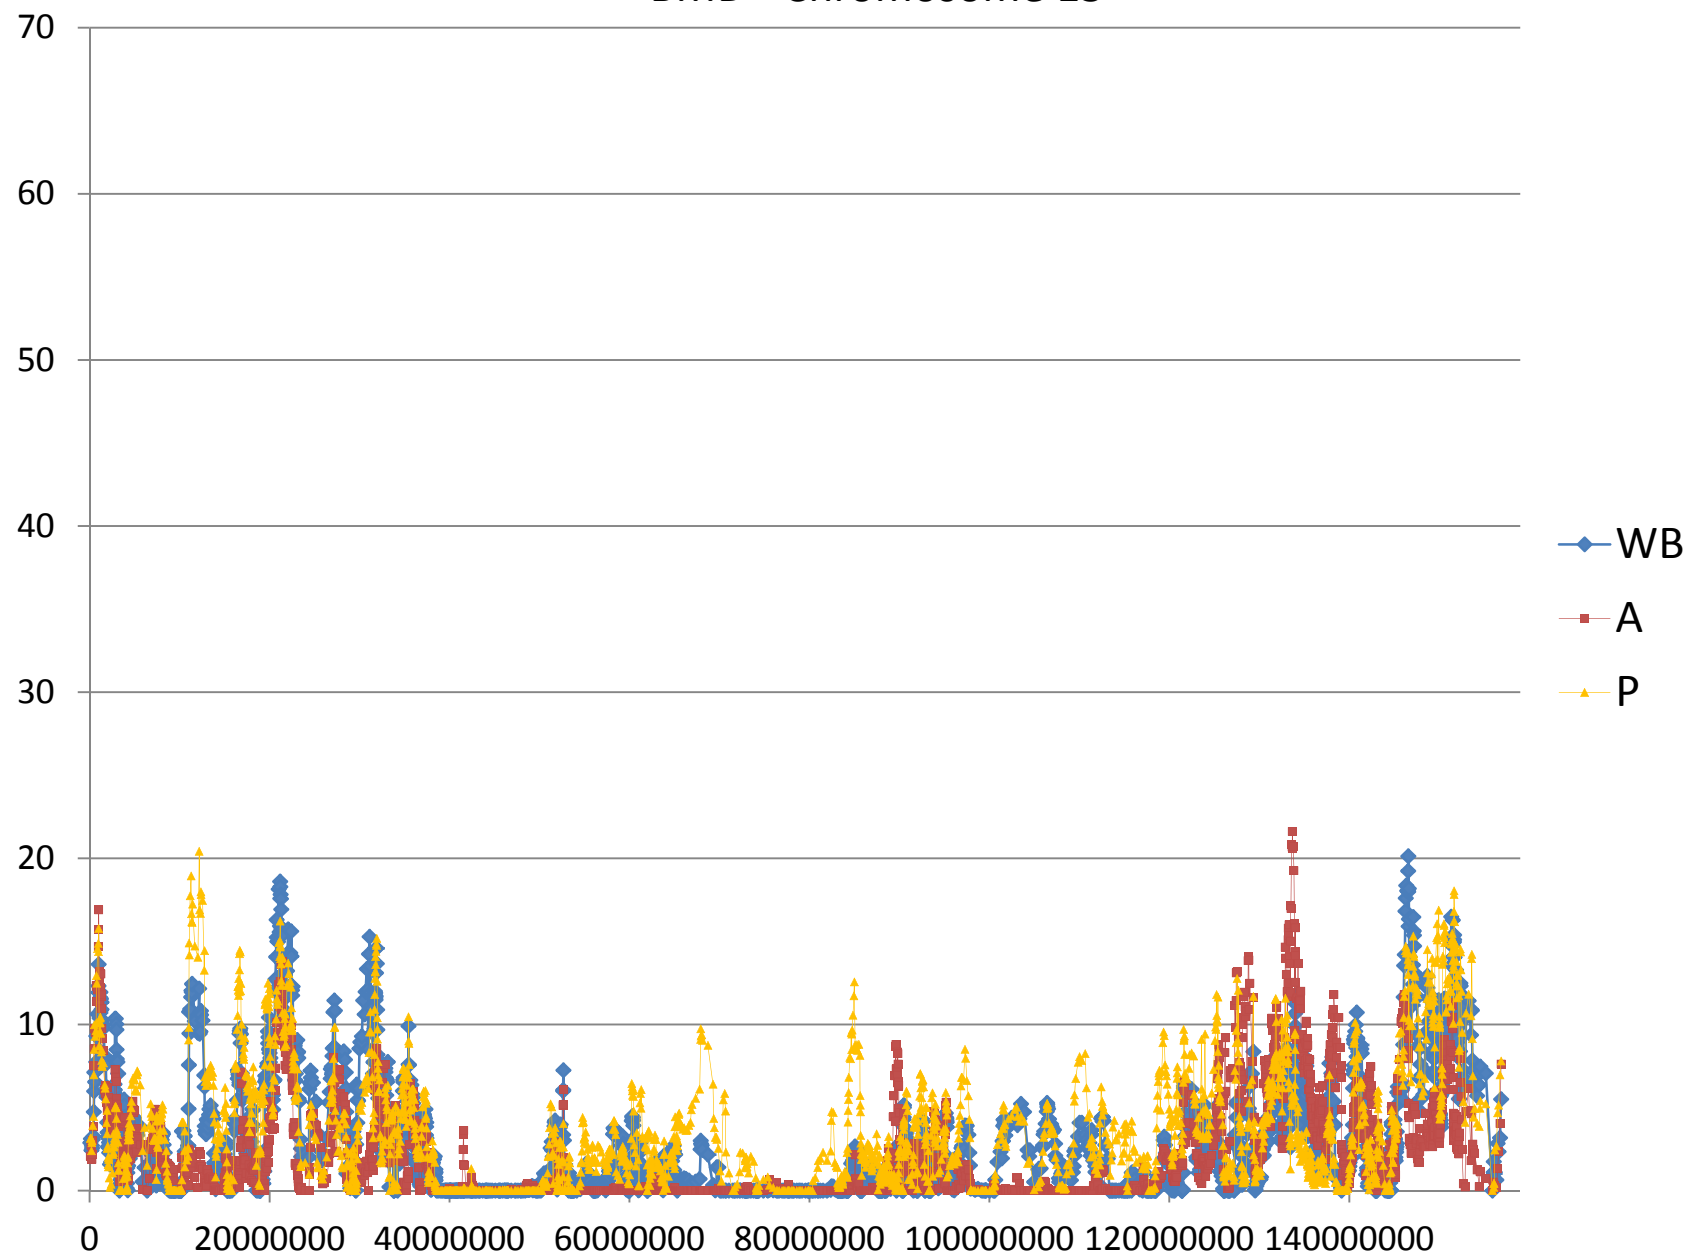

# BMD - Chromosome 16

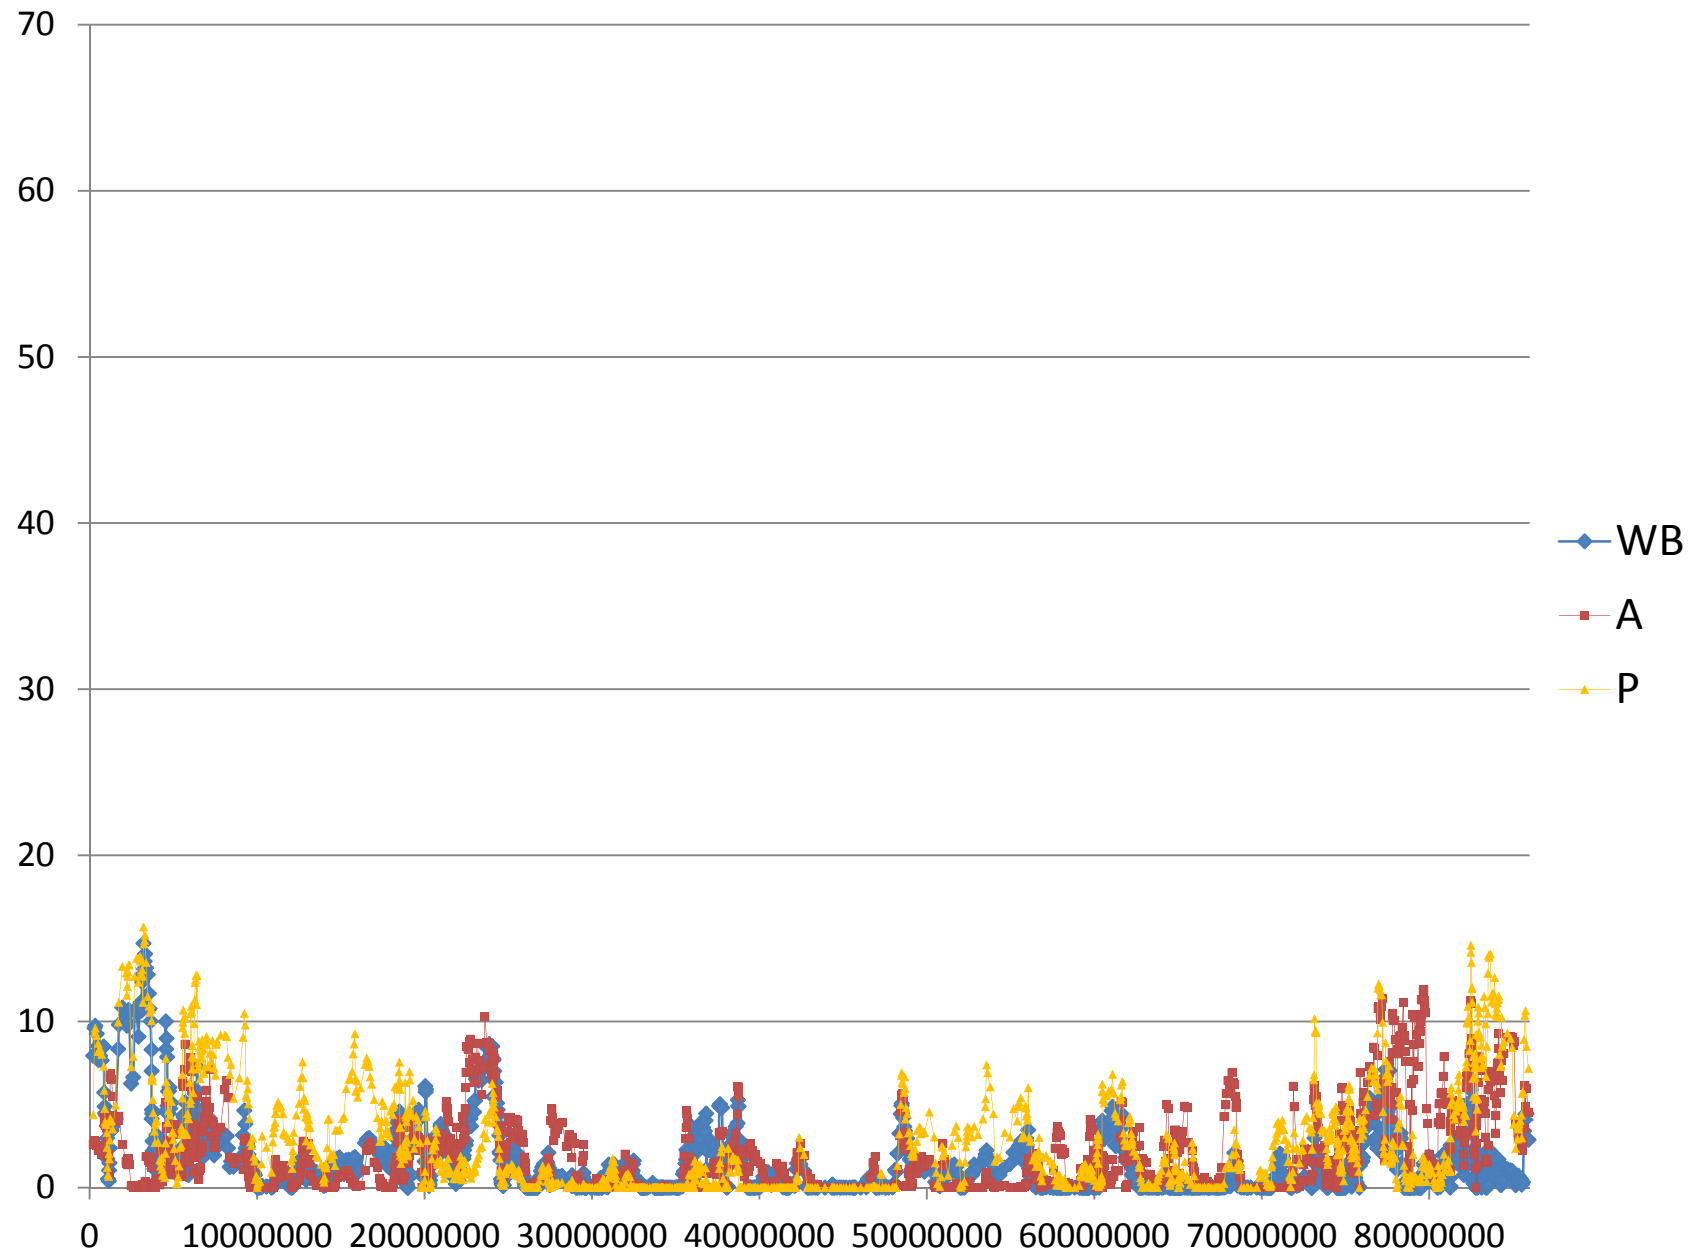



# BMD - Chromosome 17

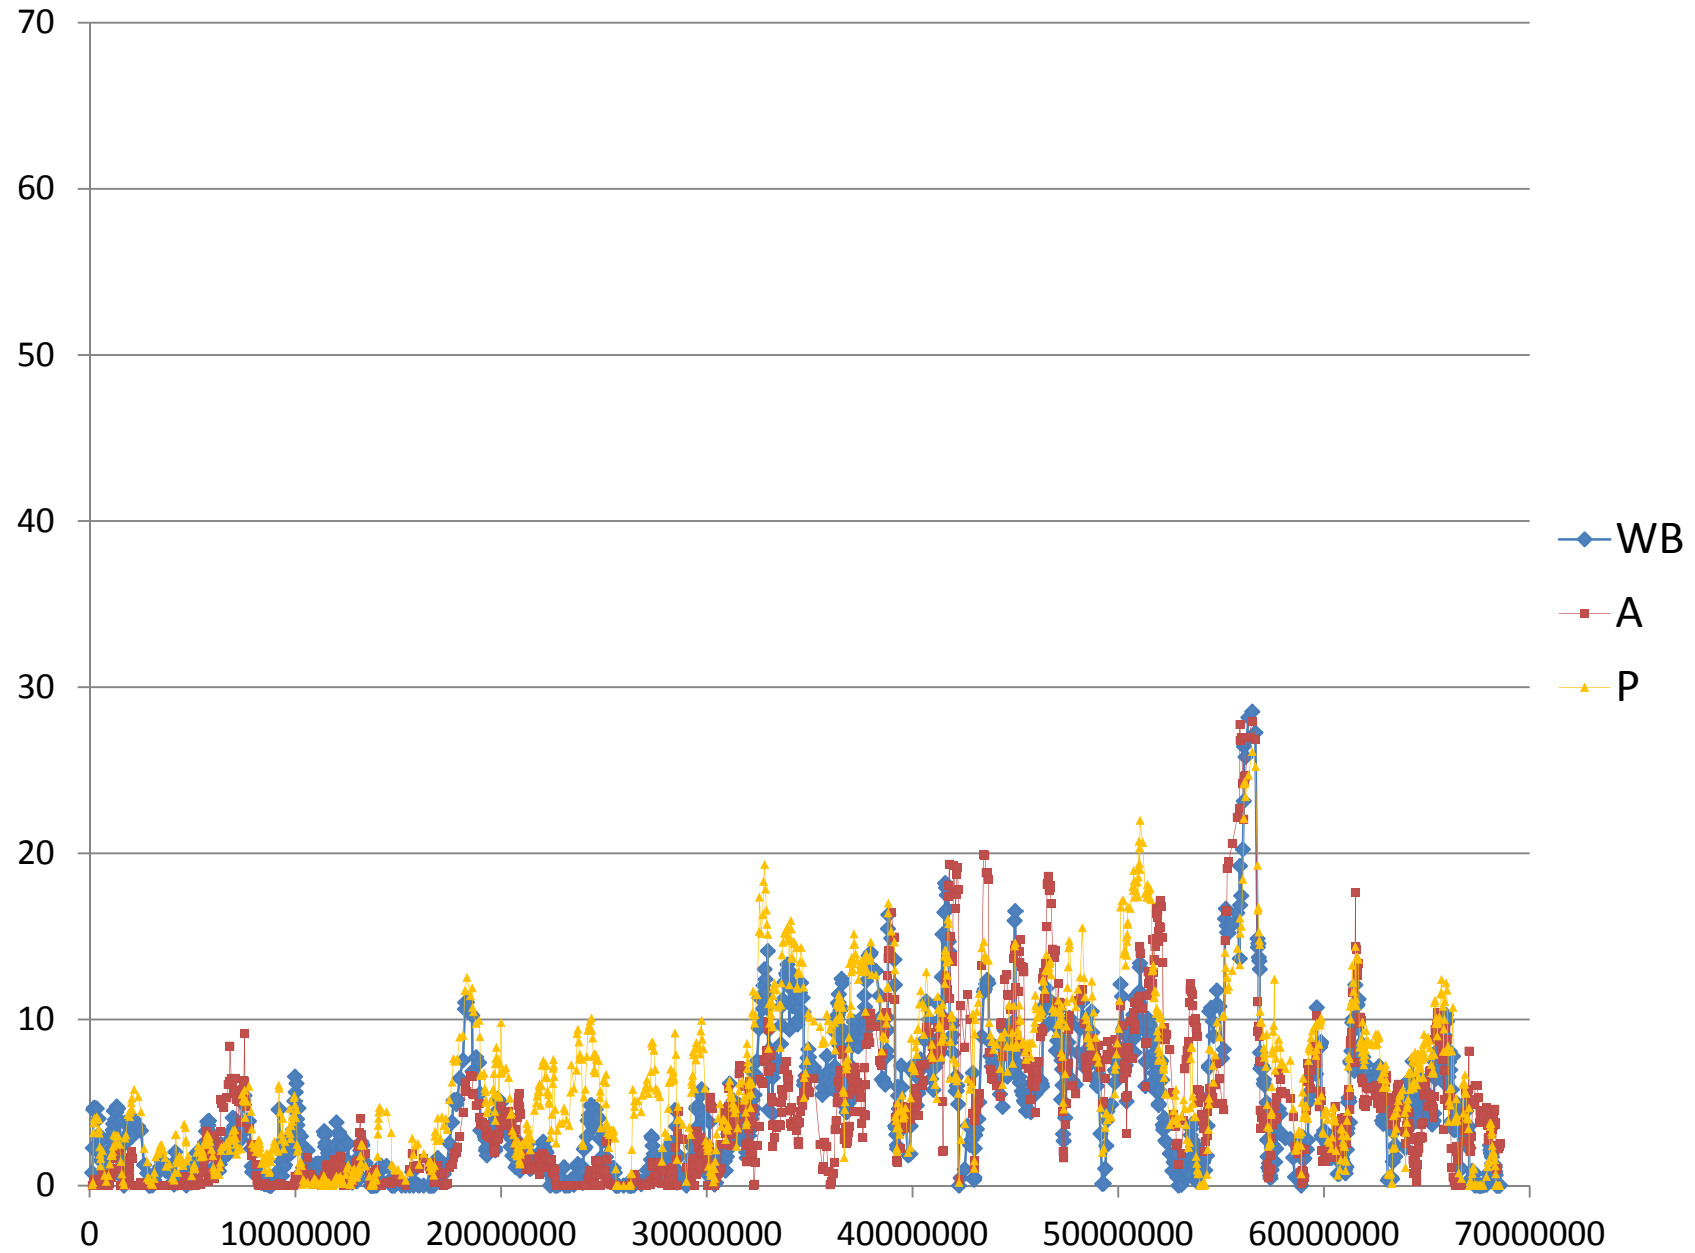

# BMD - Chromosome 18

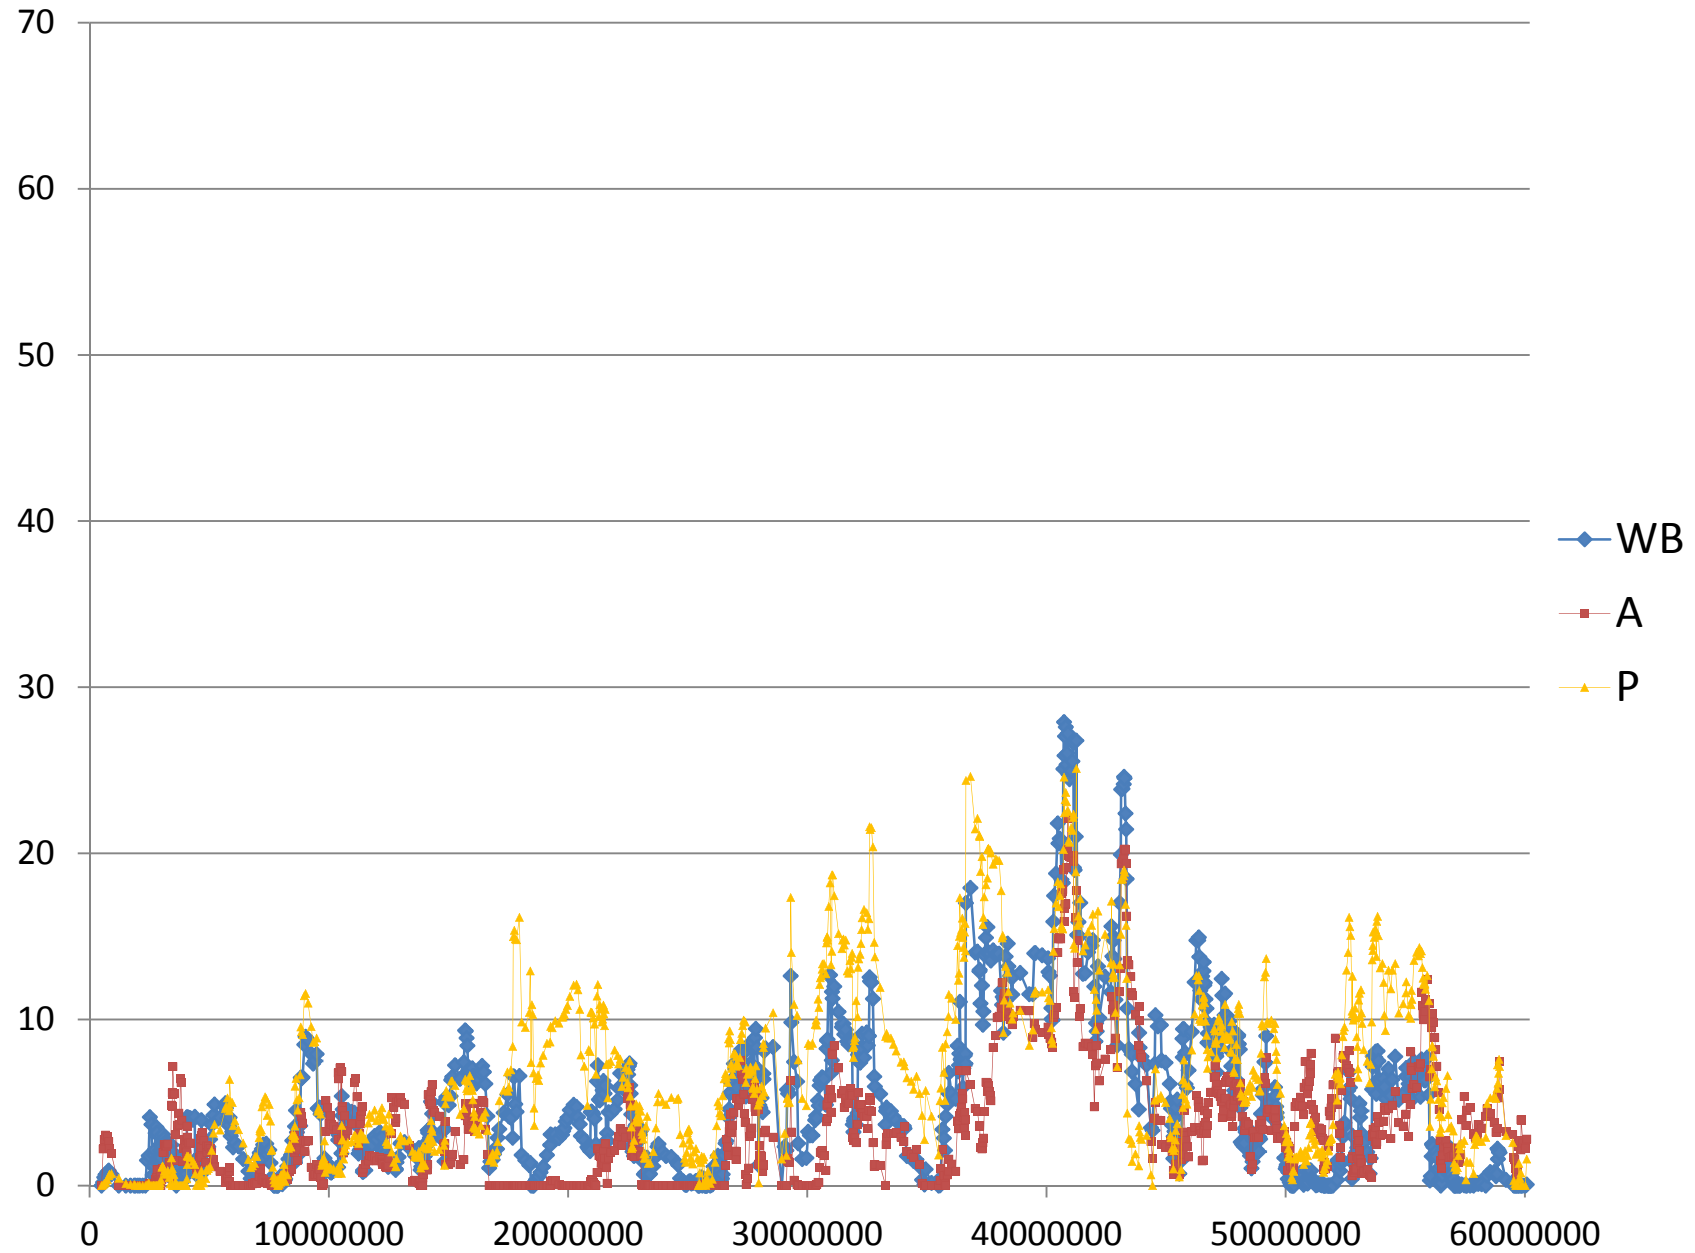

Supplement: Supplementary file 2 [file aab-60-51-2017-supplement.zip]
