# Supplementary material for: Genome-wide QTL mapping results for regional DXA body composition and bone mineral density traits in pigs
Source: Copernicus journal article supplement (doi:10.5194/aab-60-51-2017), 2017-04-05

# Lean - Chromosome 1

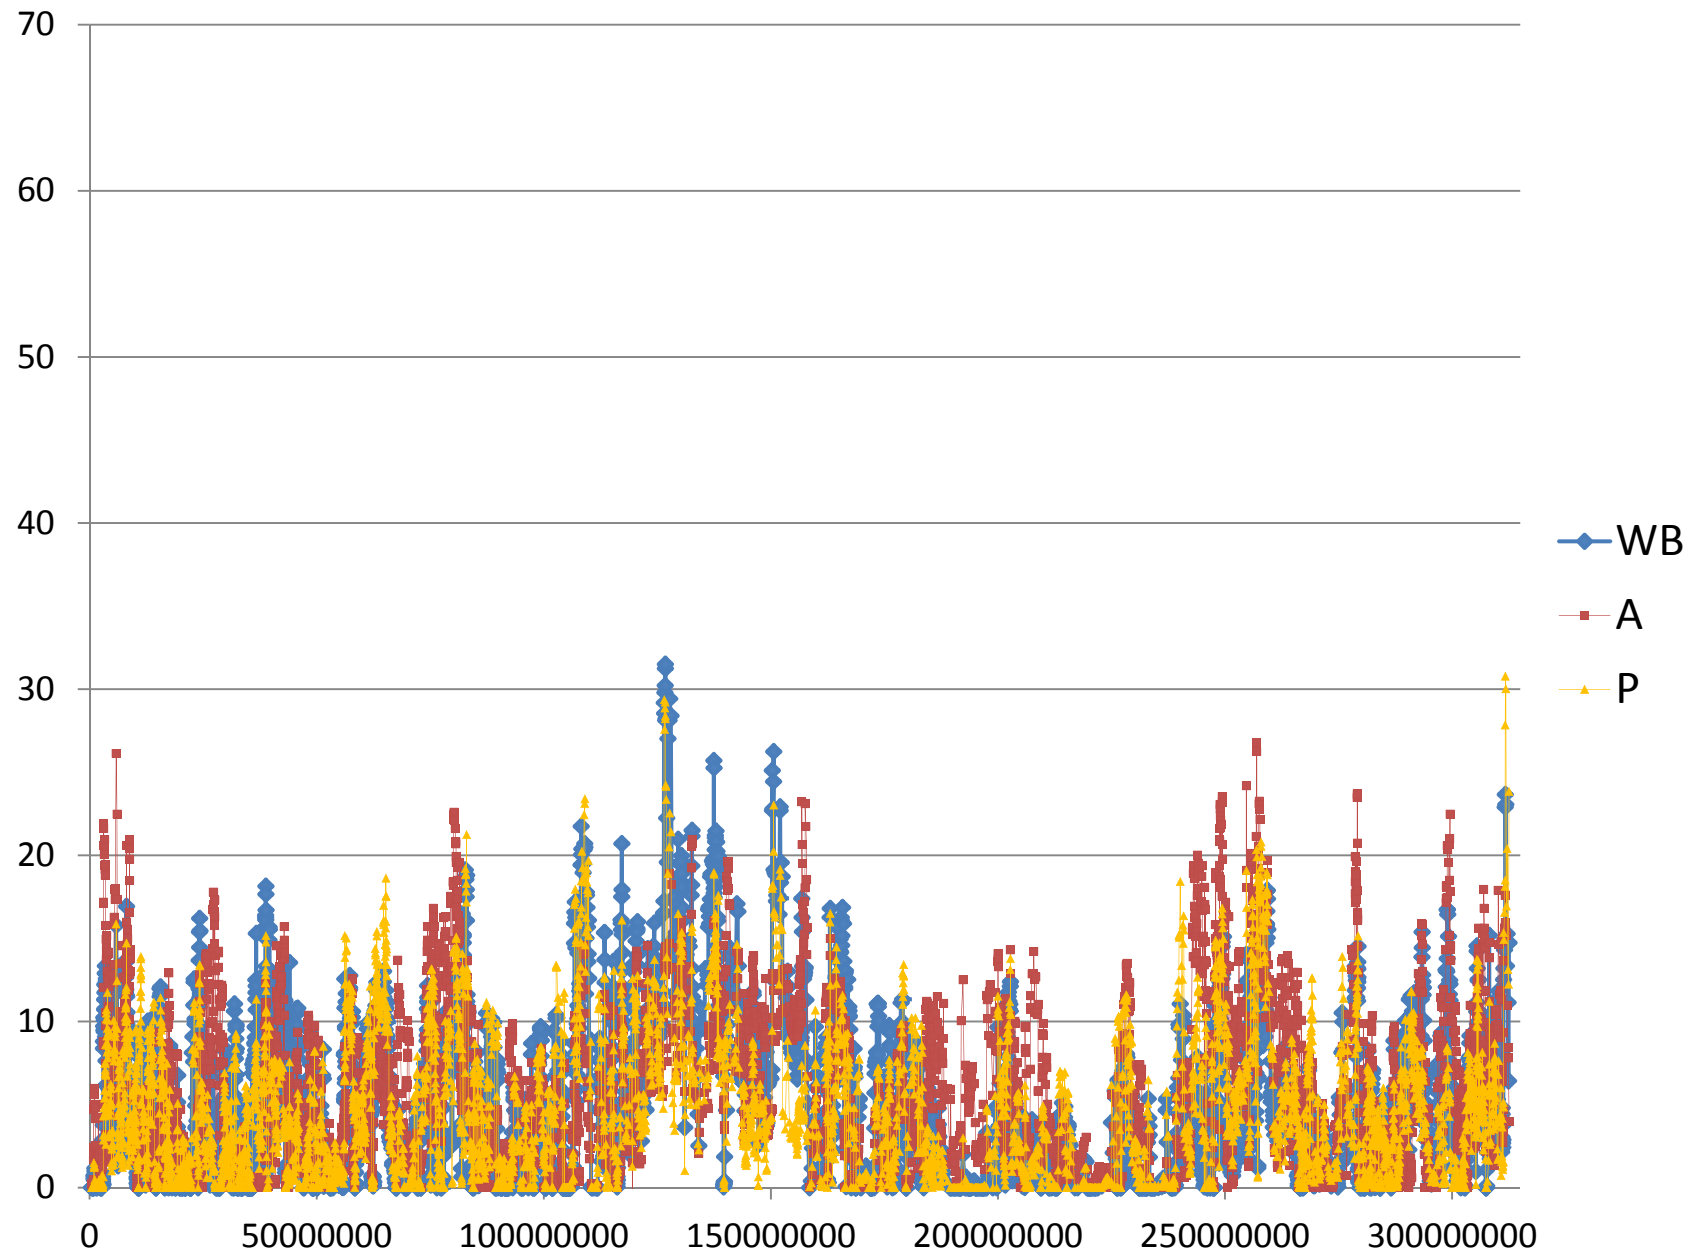

Lean - Chromosome 2

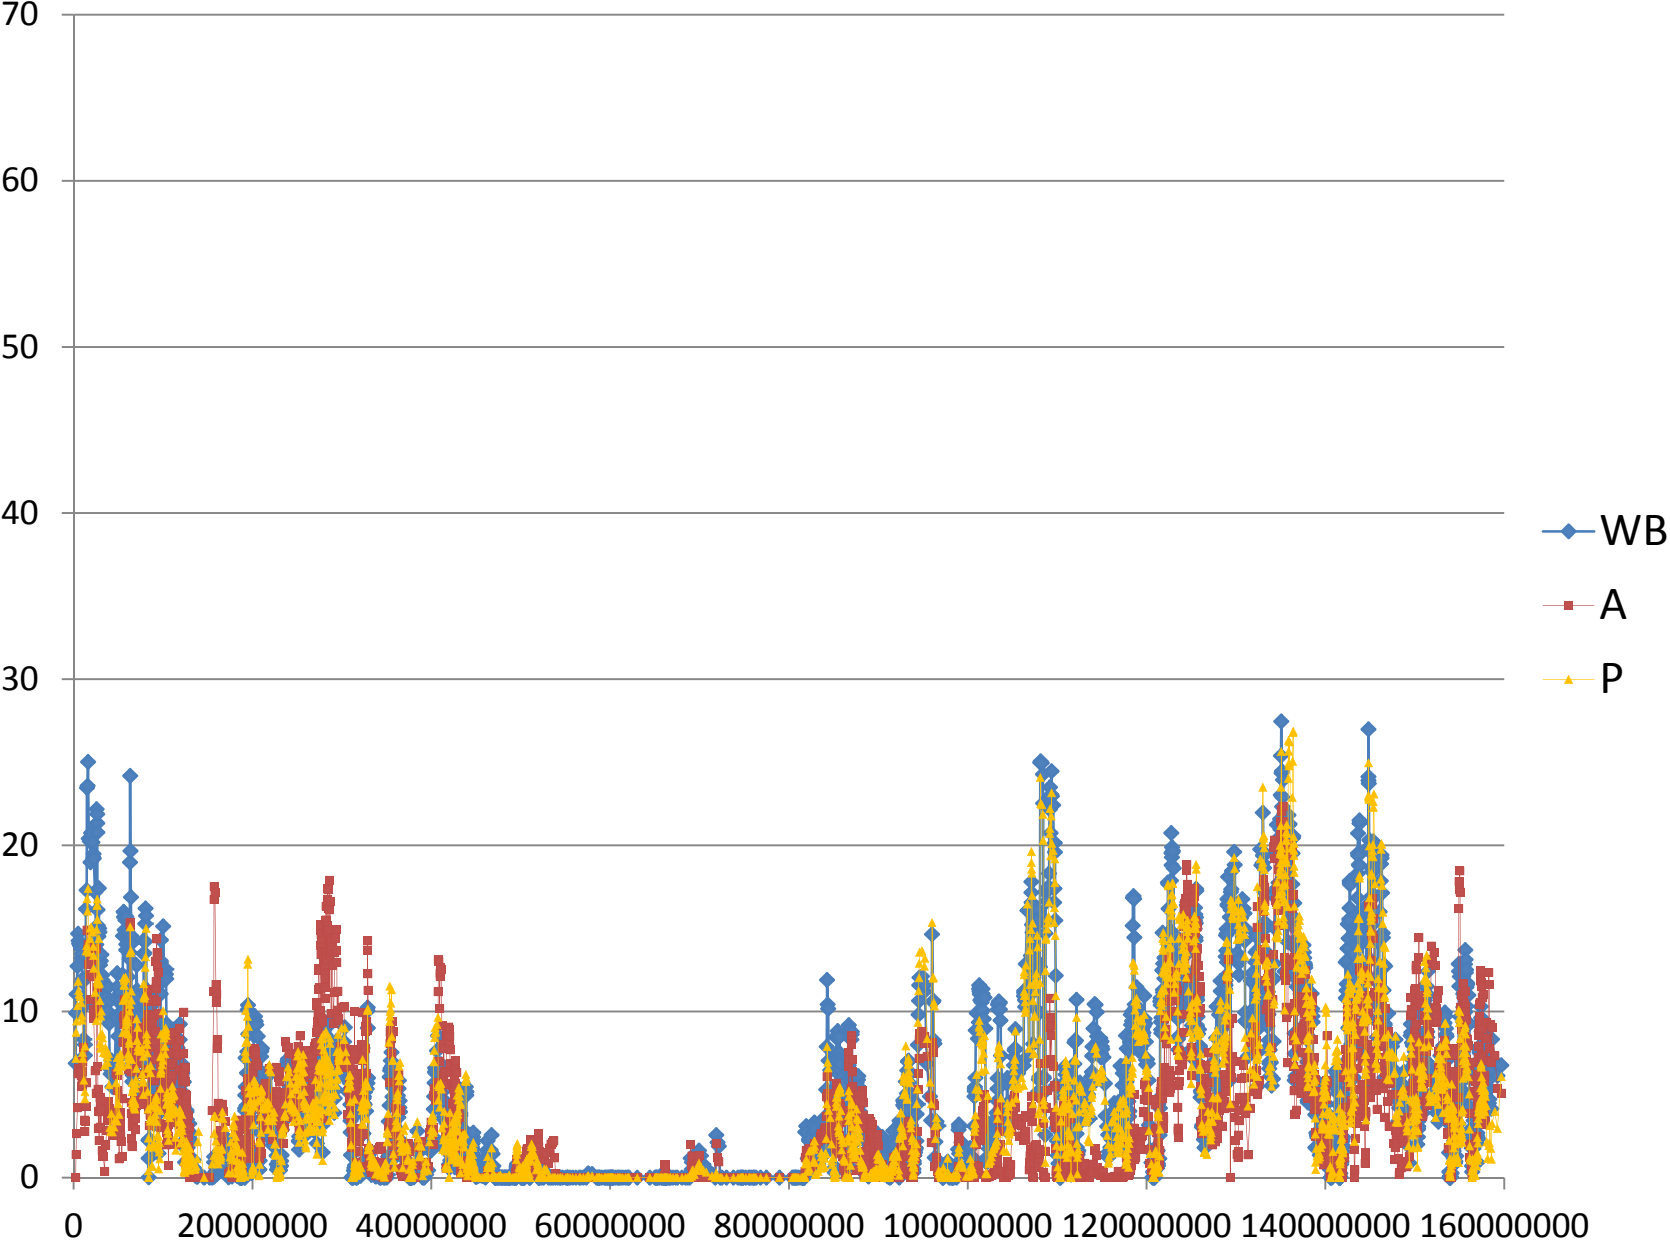

# Lean - Chromosome 3

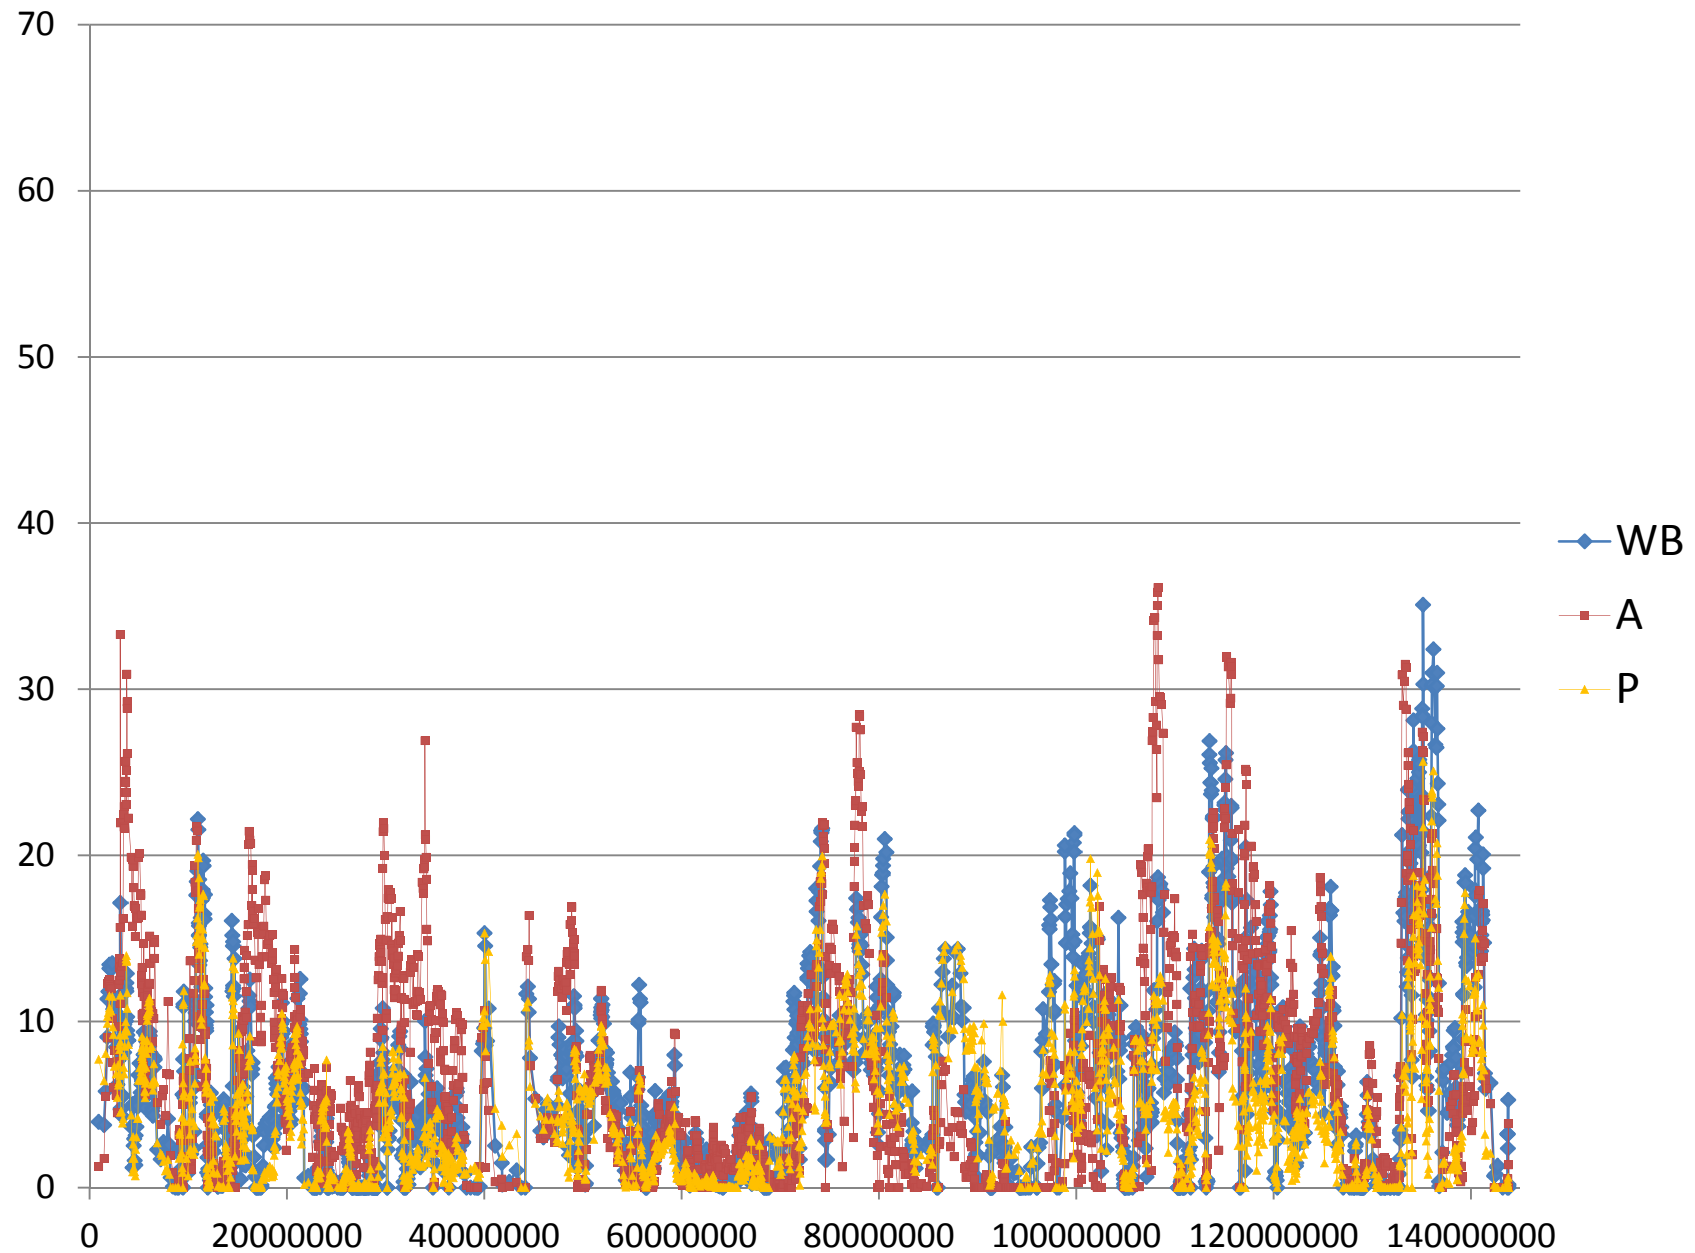

# Lean - Chromosome 4

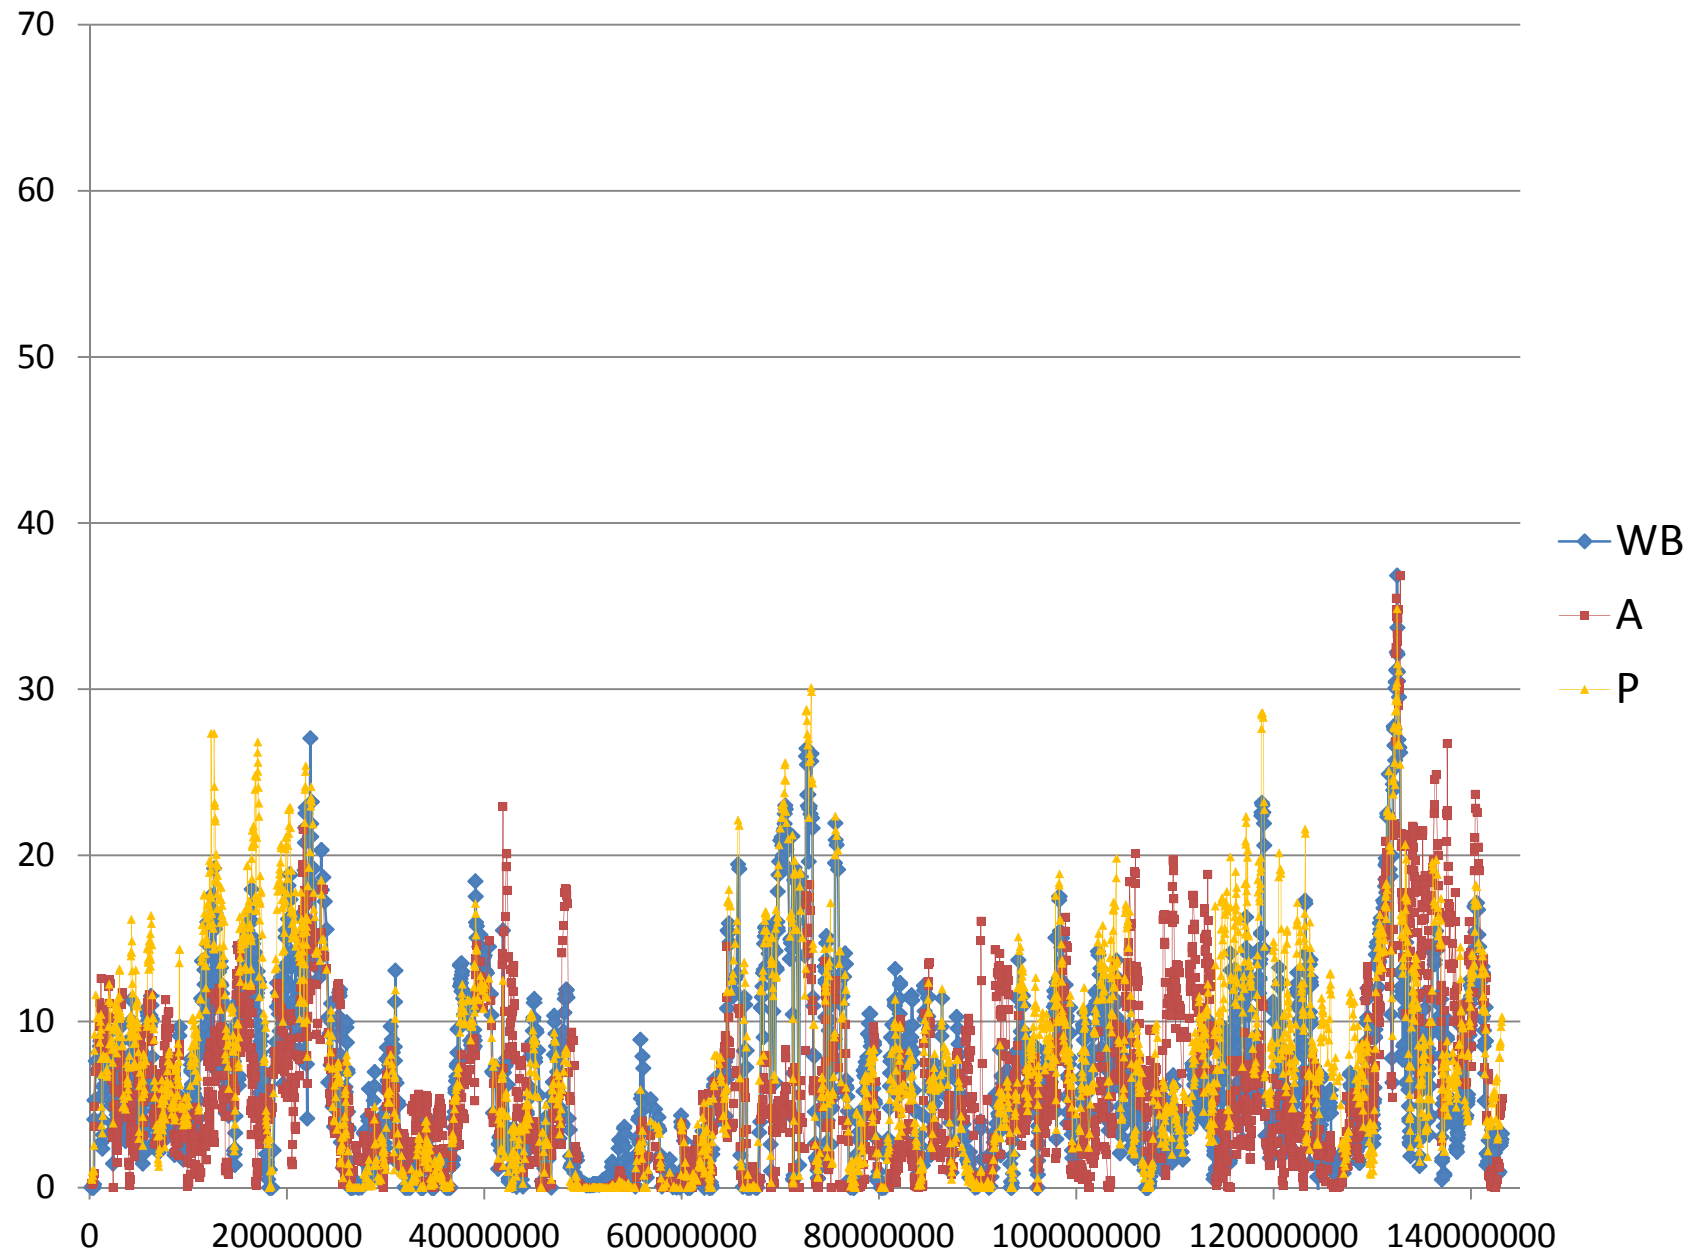

# Lean - Chromosome 5

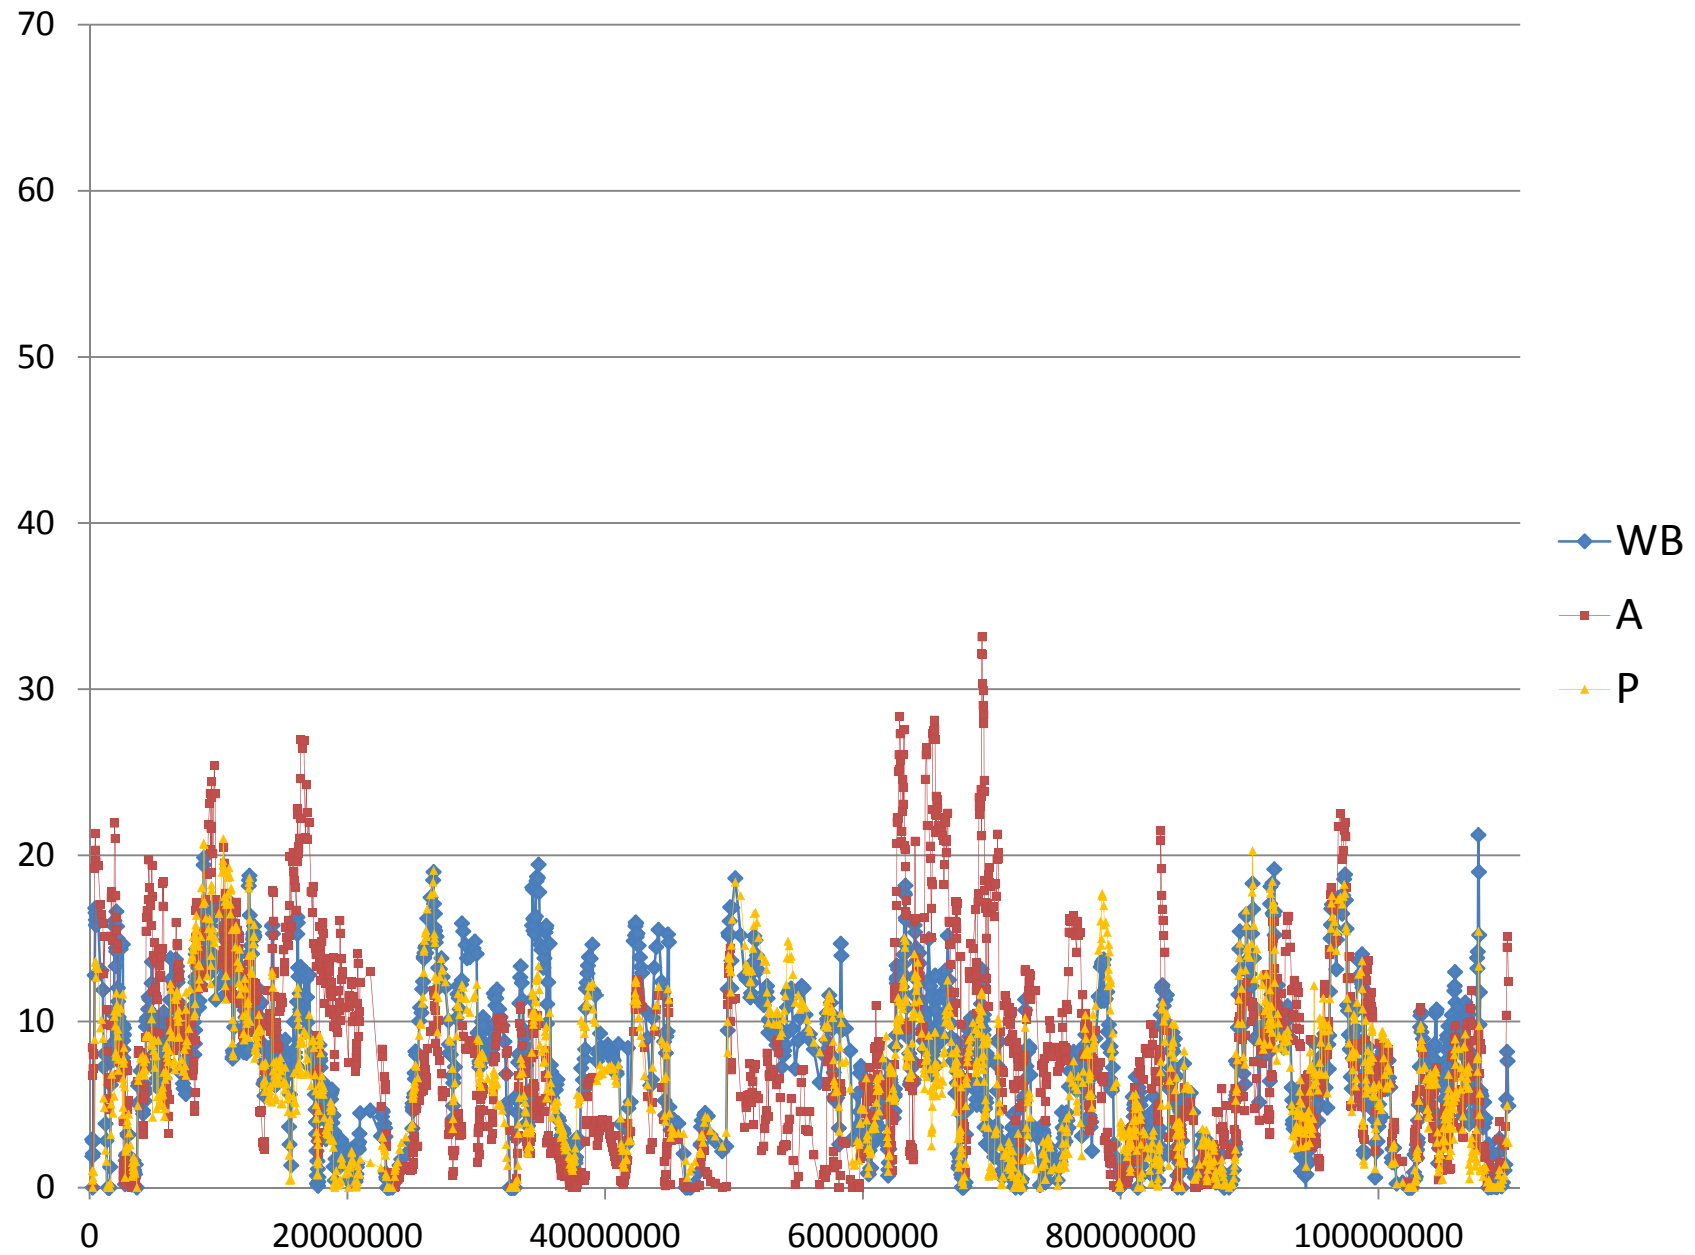

# Lean - Chromosome 6

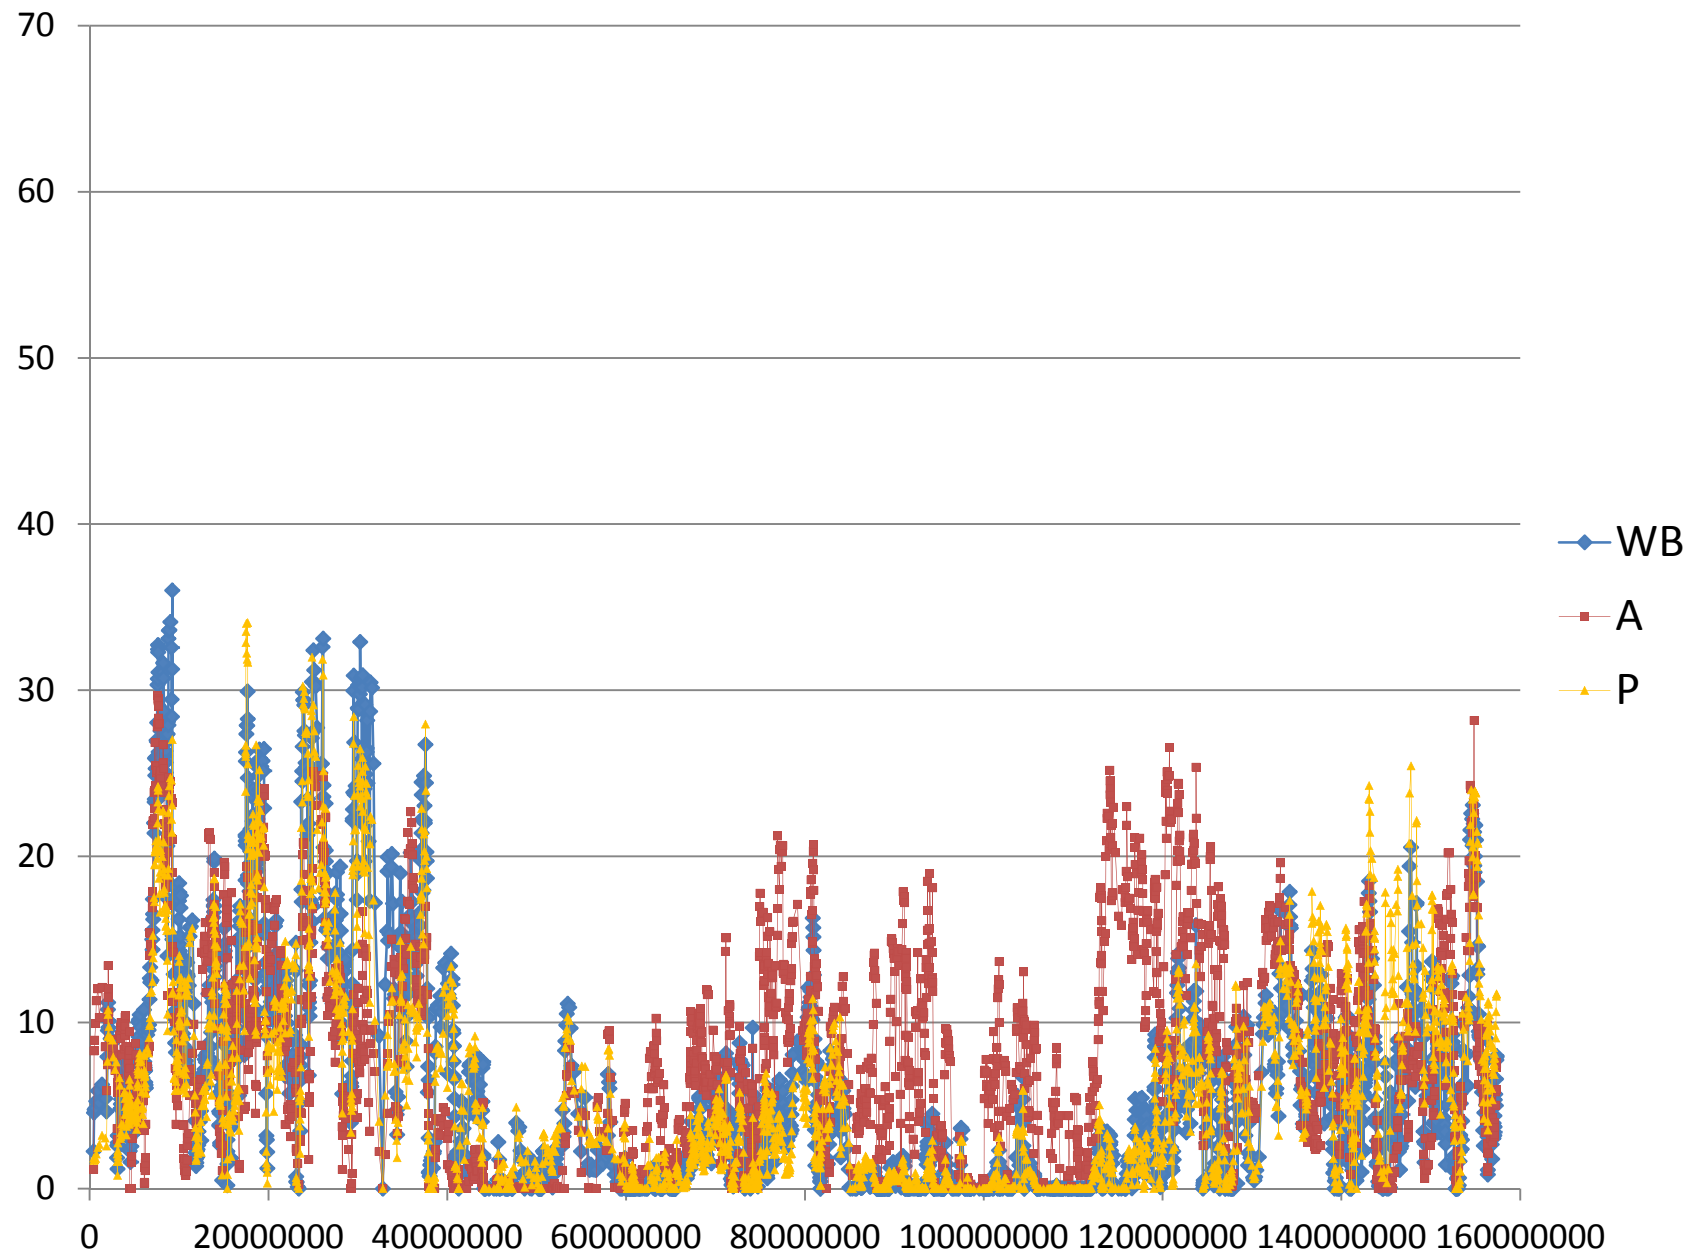

# Lean - Chromosome 7

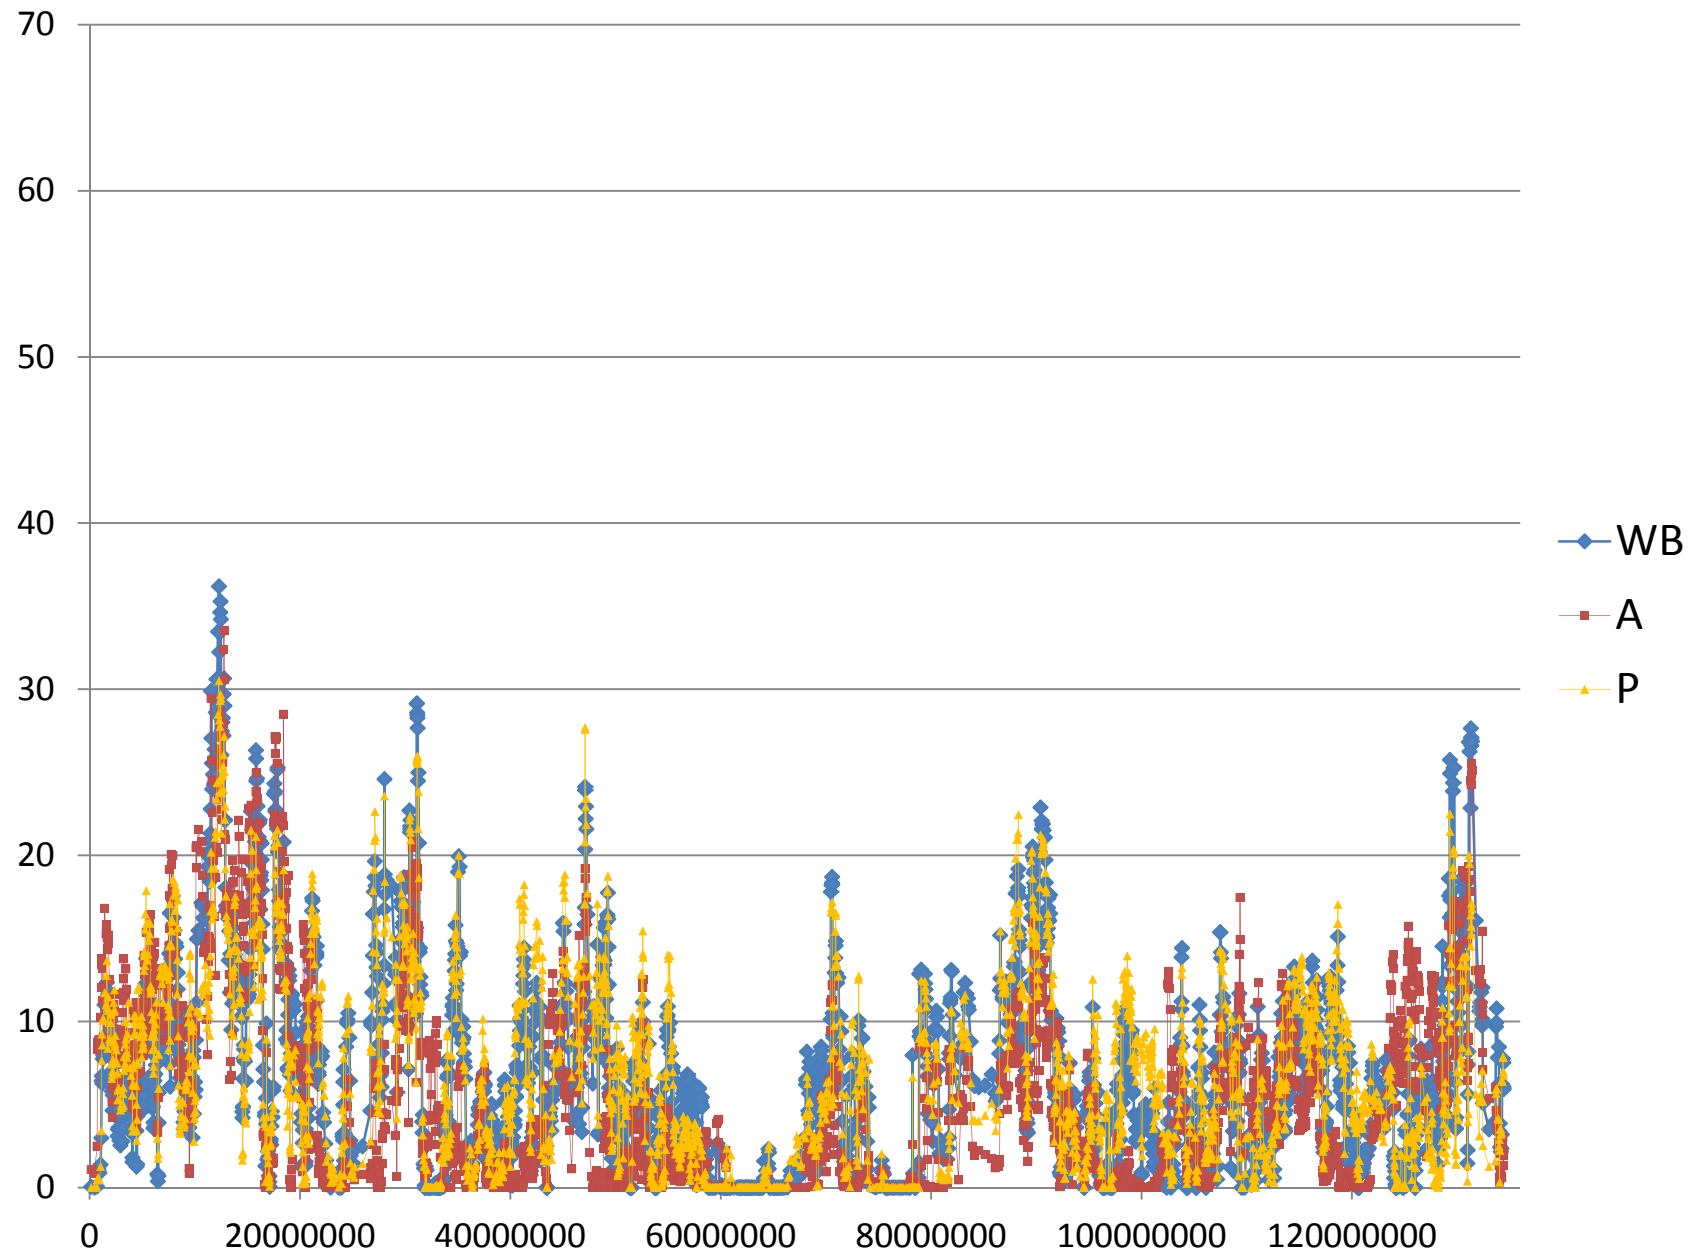

# Lean - Chromosome 8

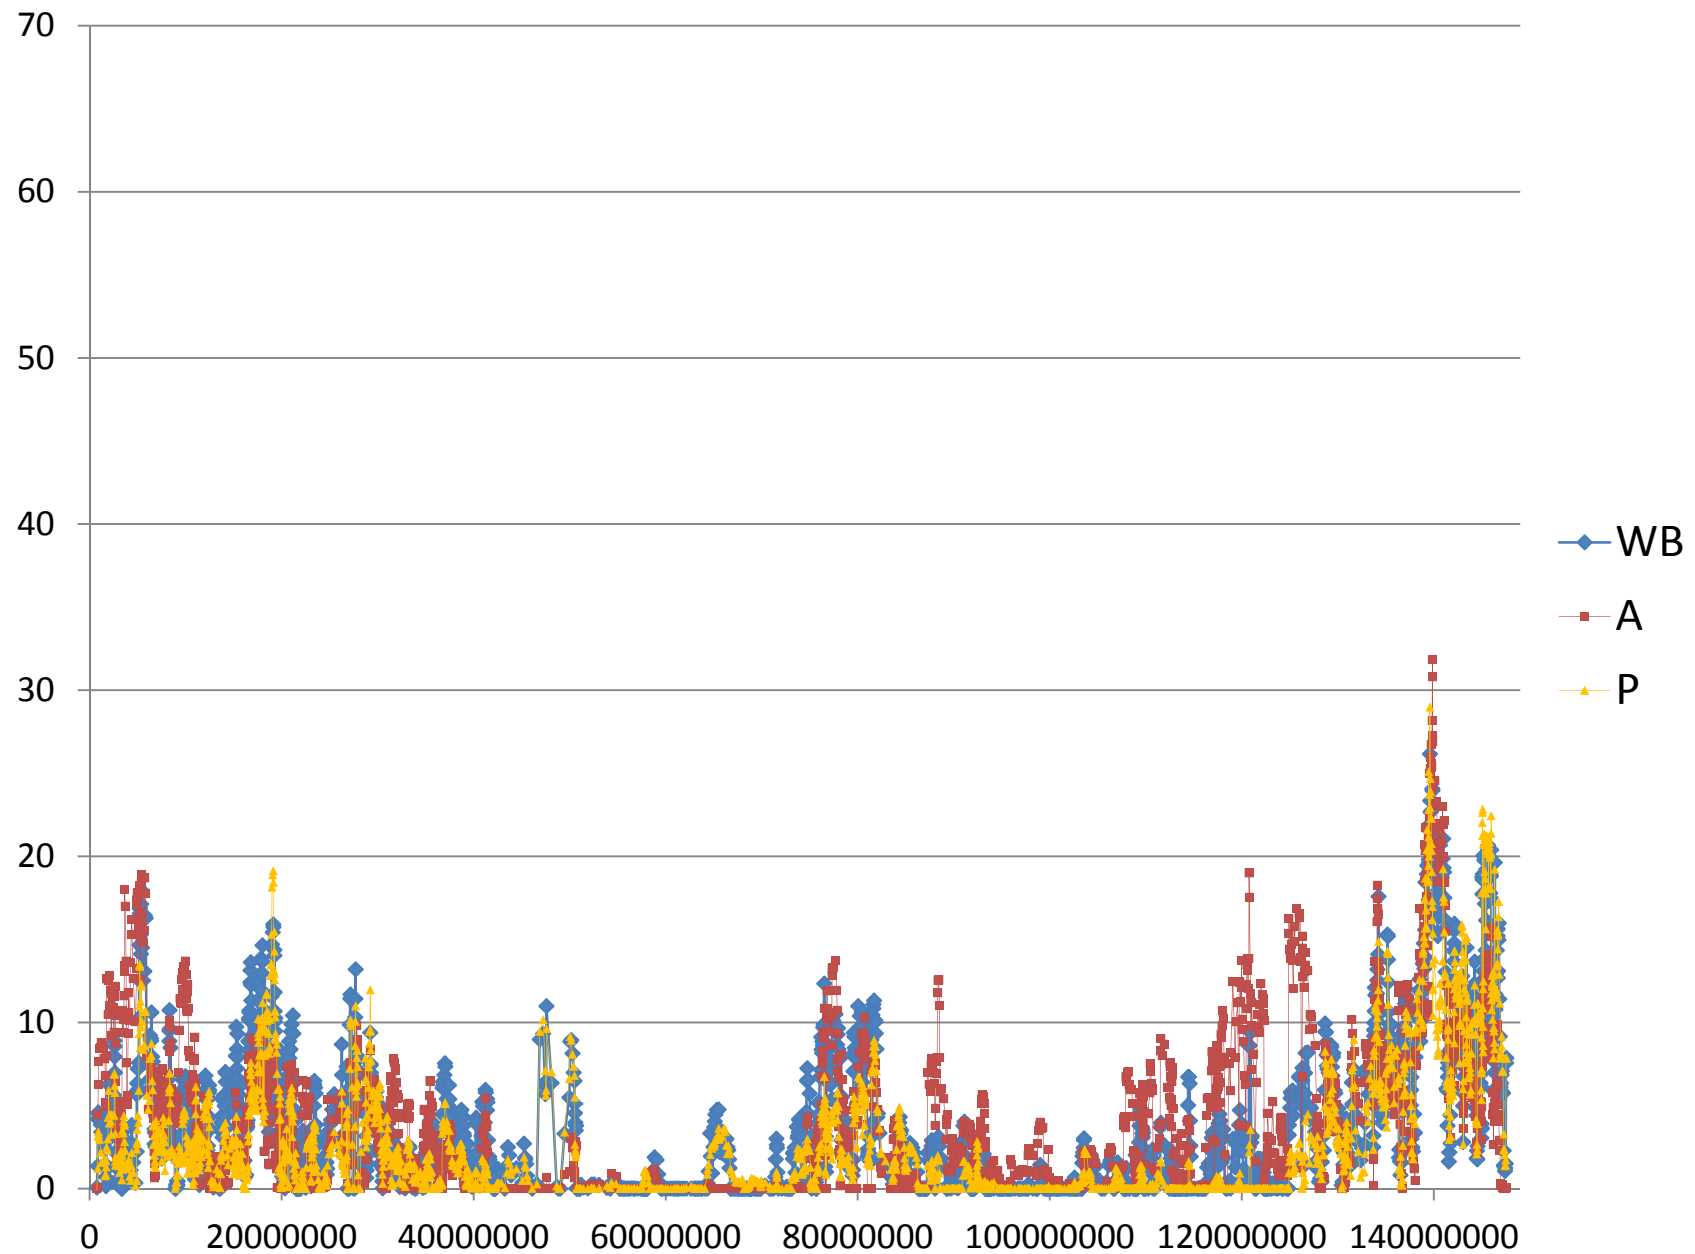



Lean - Chromosome 9

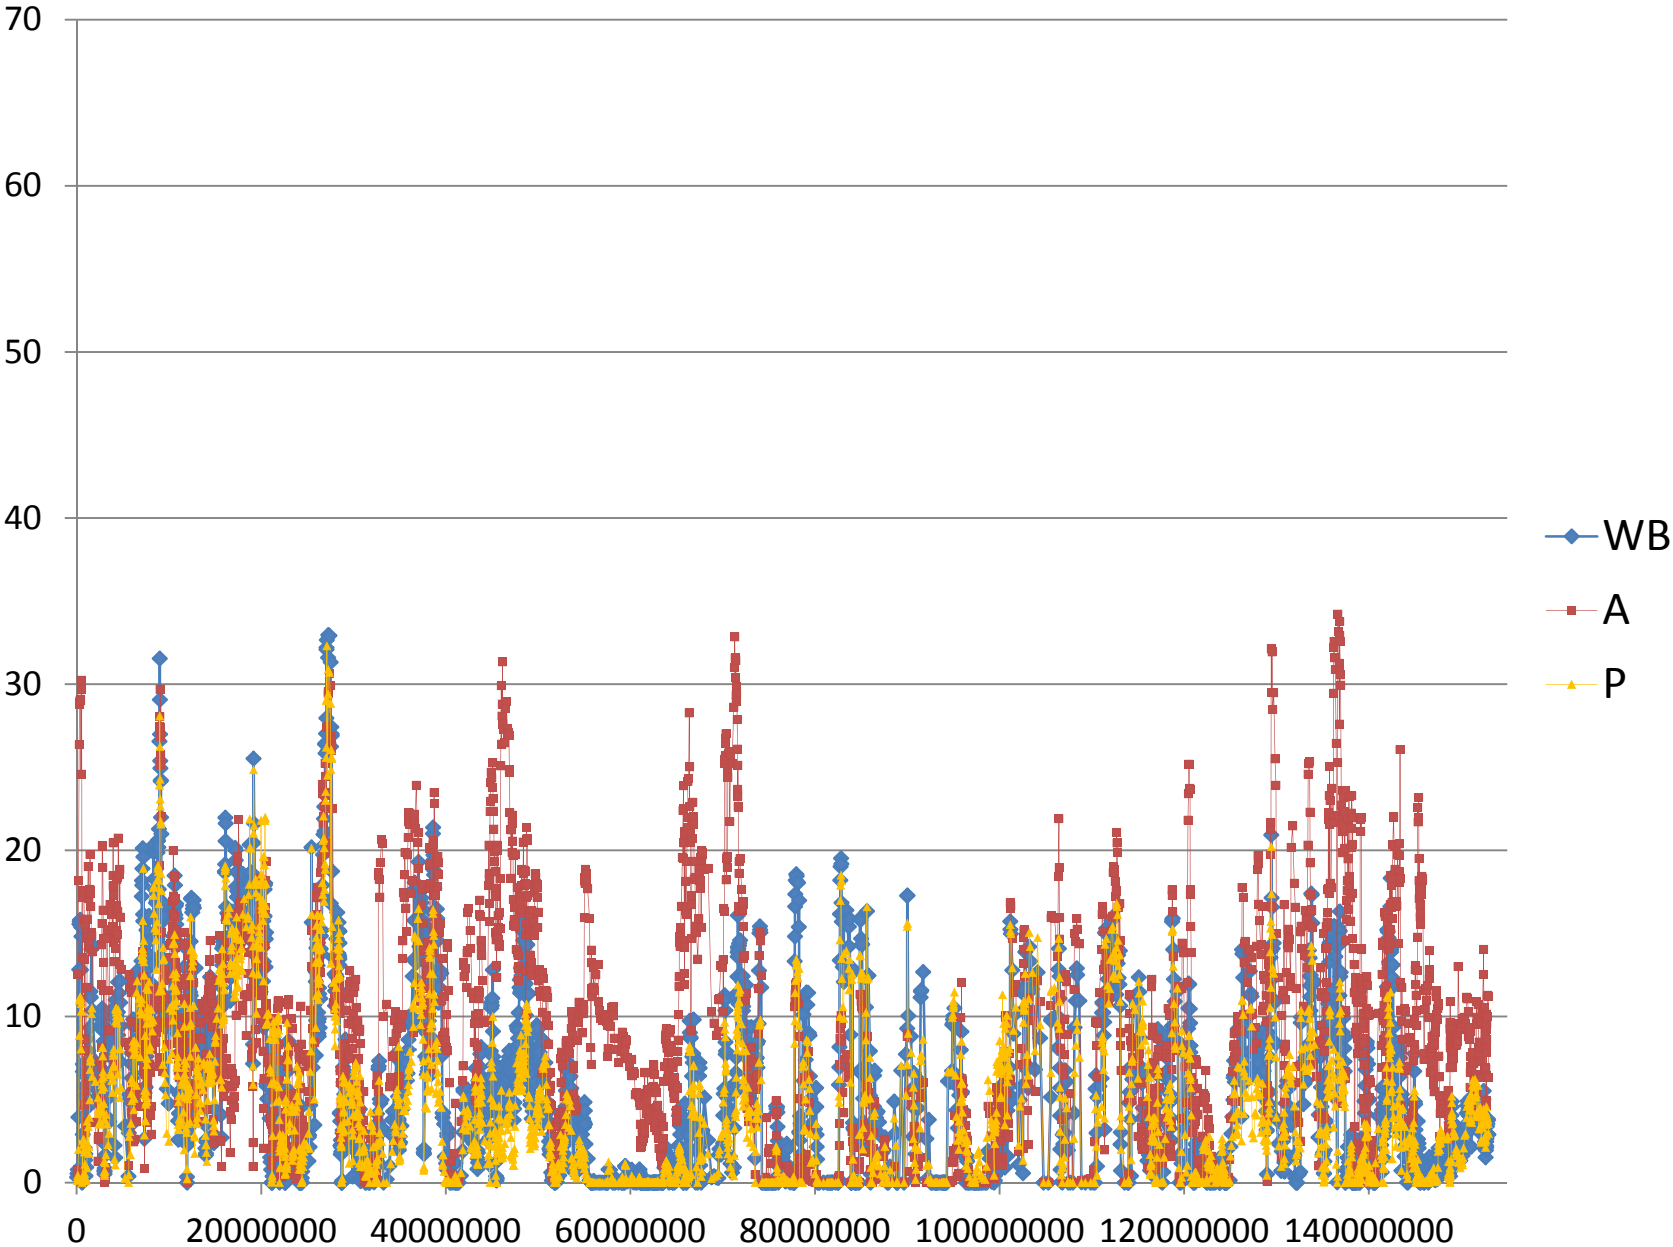

Lean - Chromosome 10

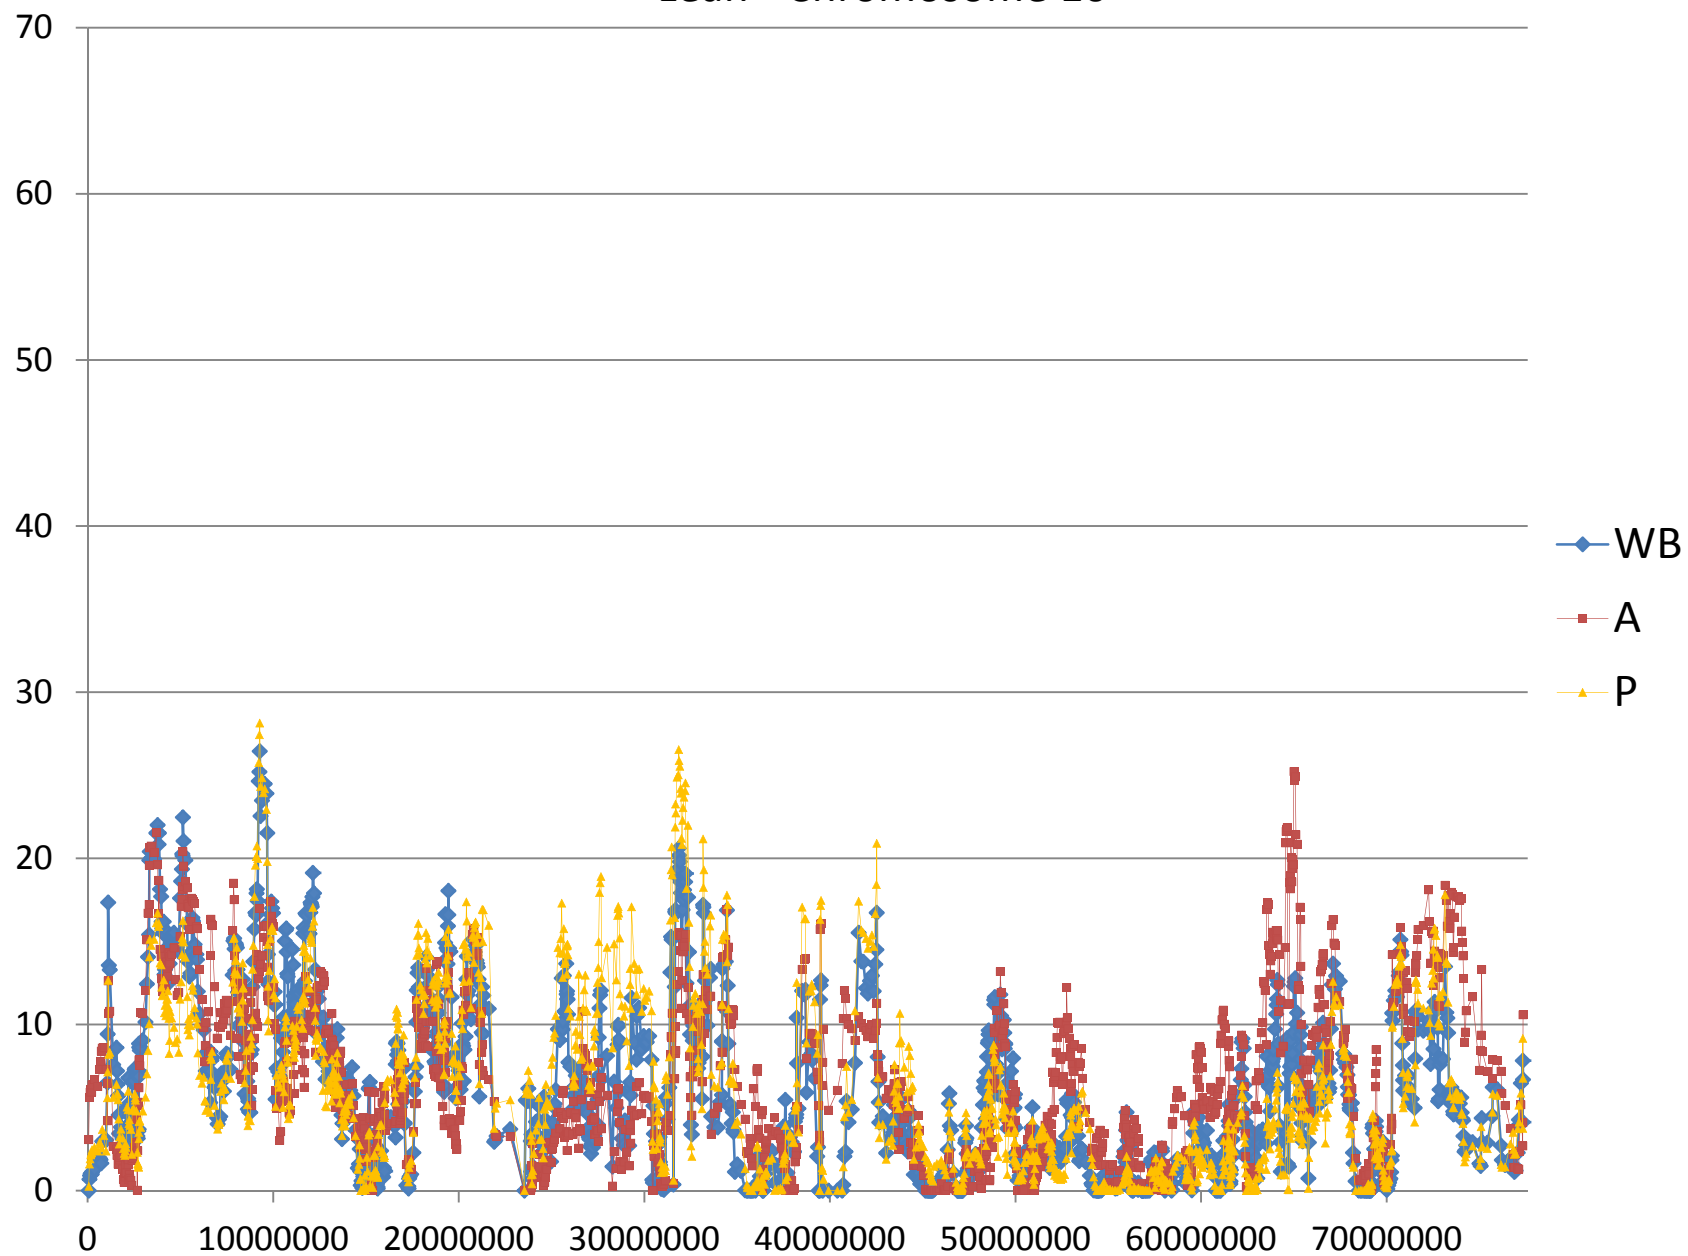

# Lean - Chromosome 11

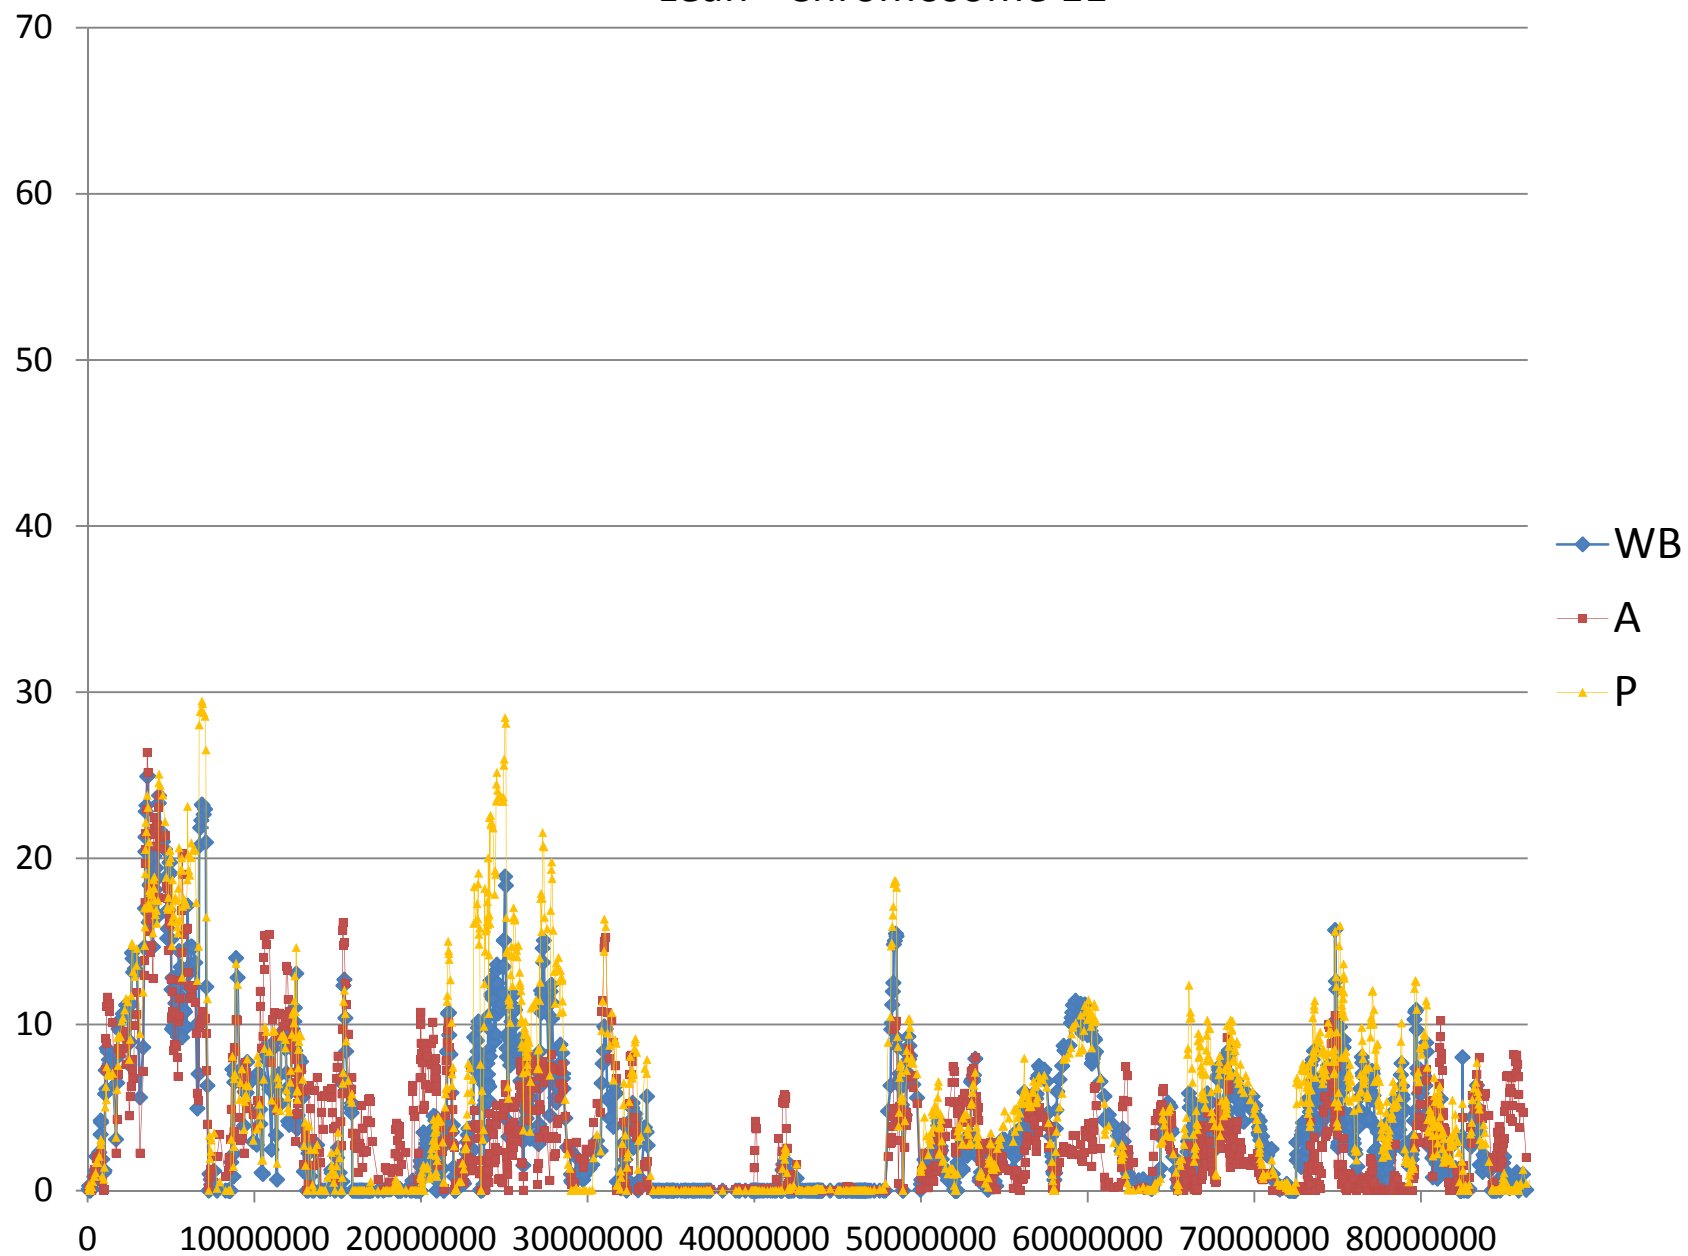

# Lean - Chromosome 12

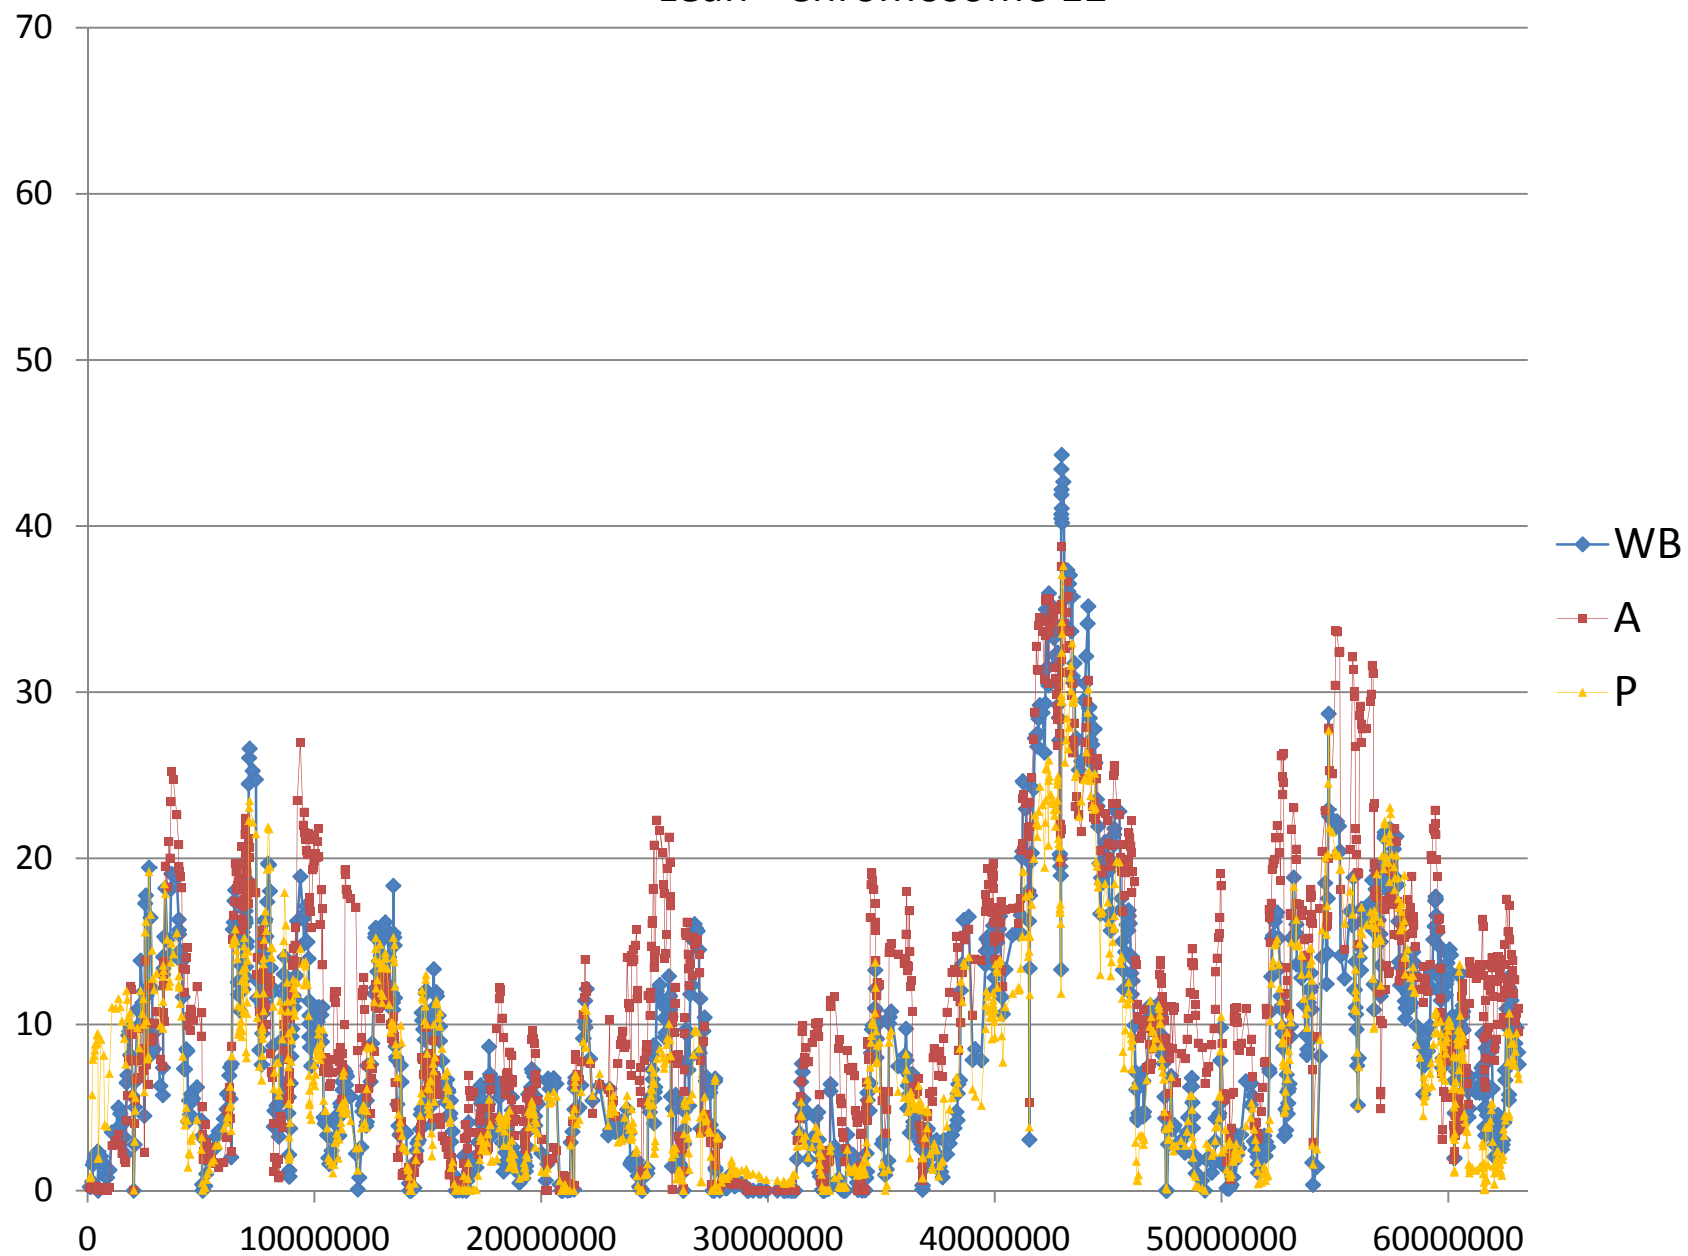

# Lean - Chromosome 13

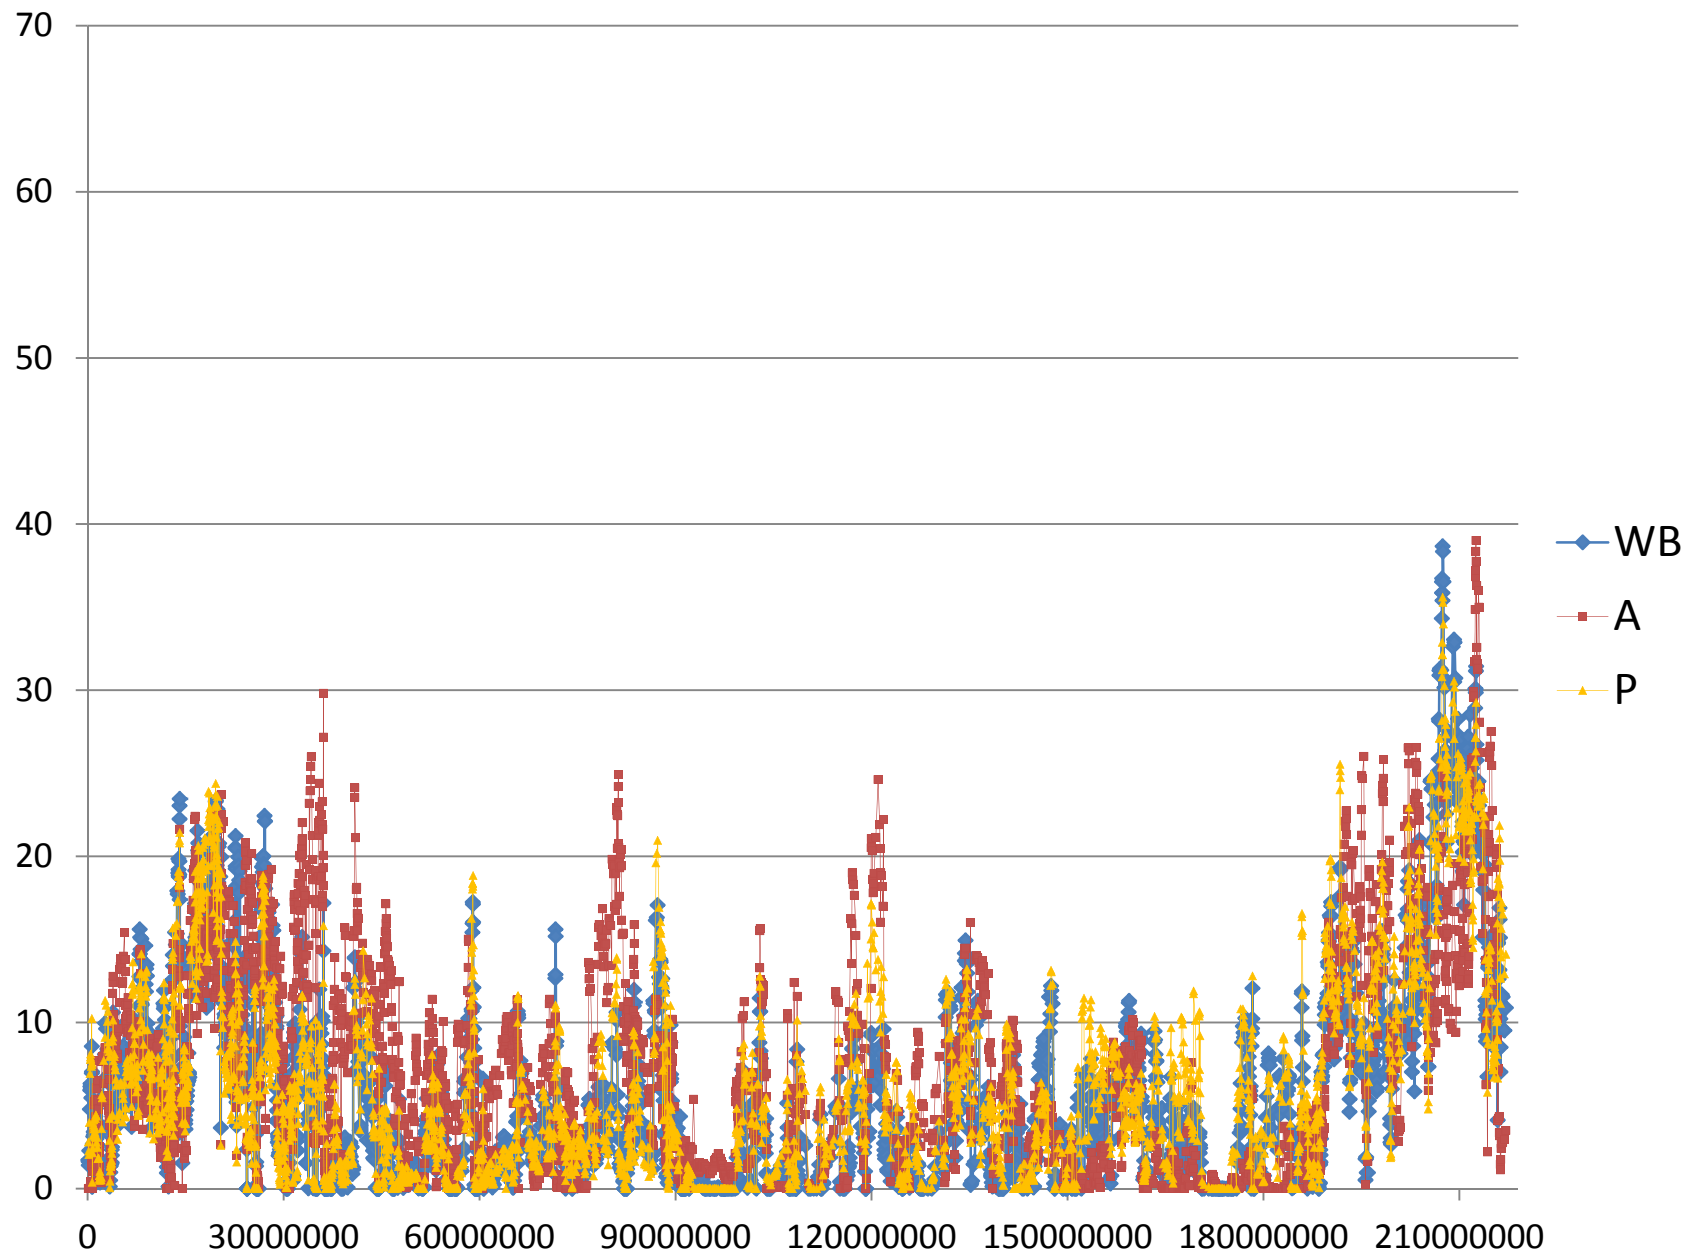

# Lean - Chromosome 14

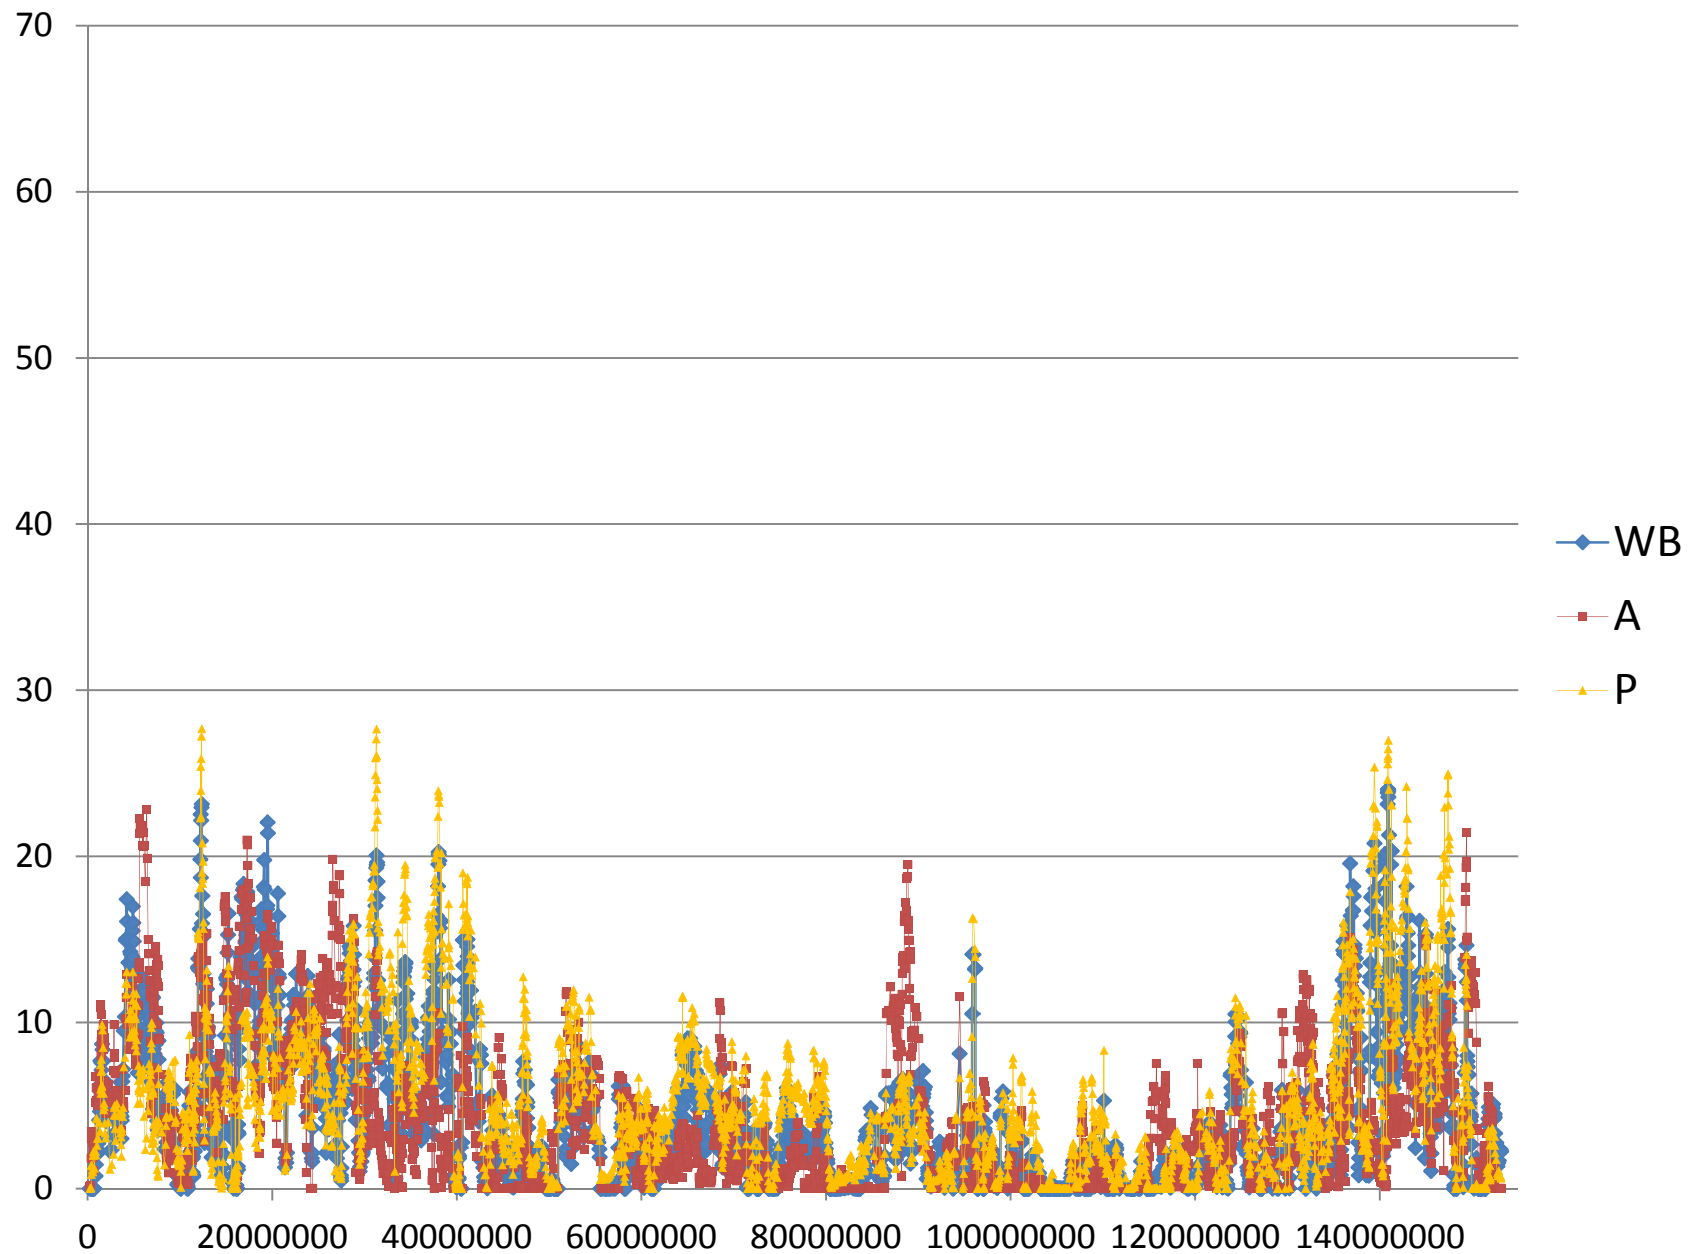

# Lean - Chromosome 15

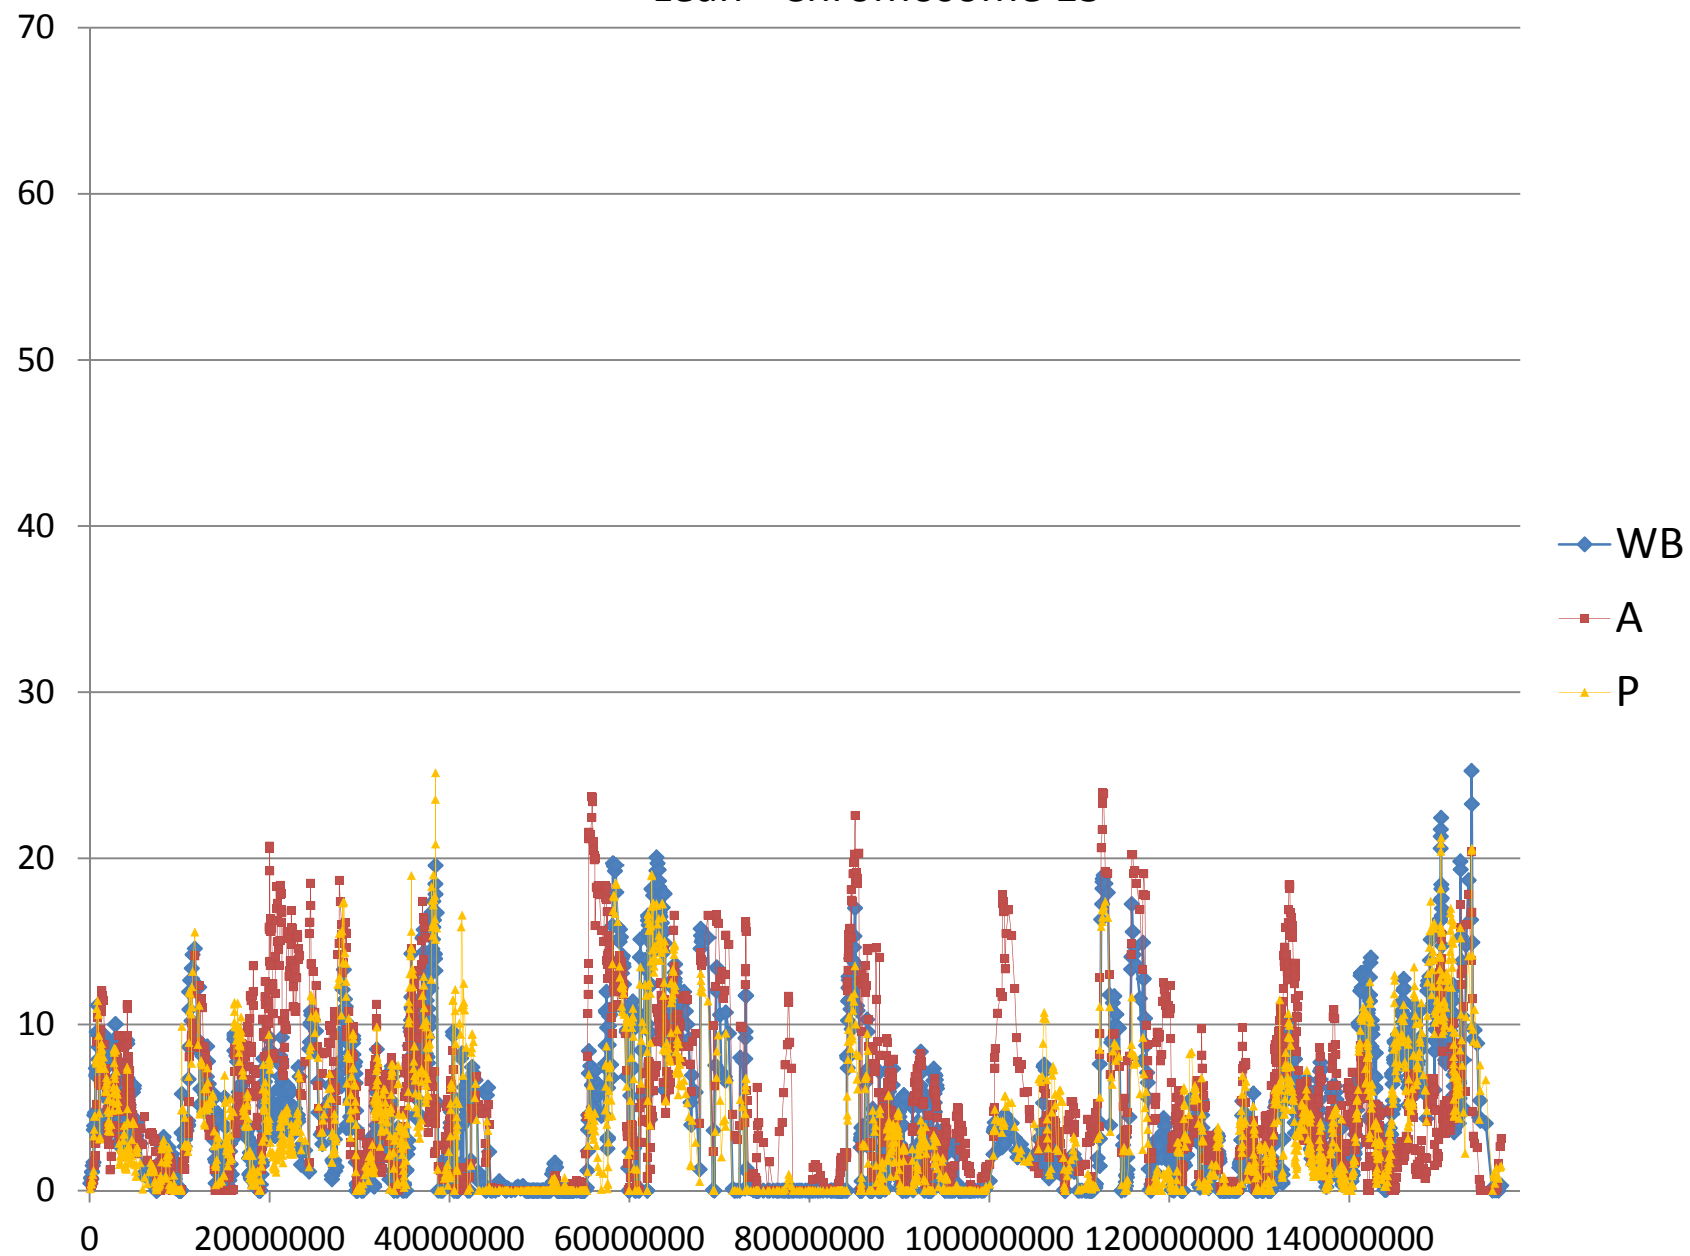

# Lean - Chromosome 16

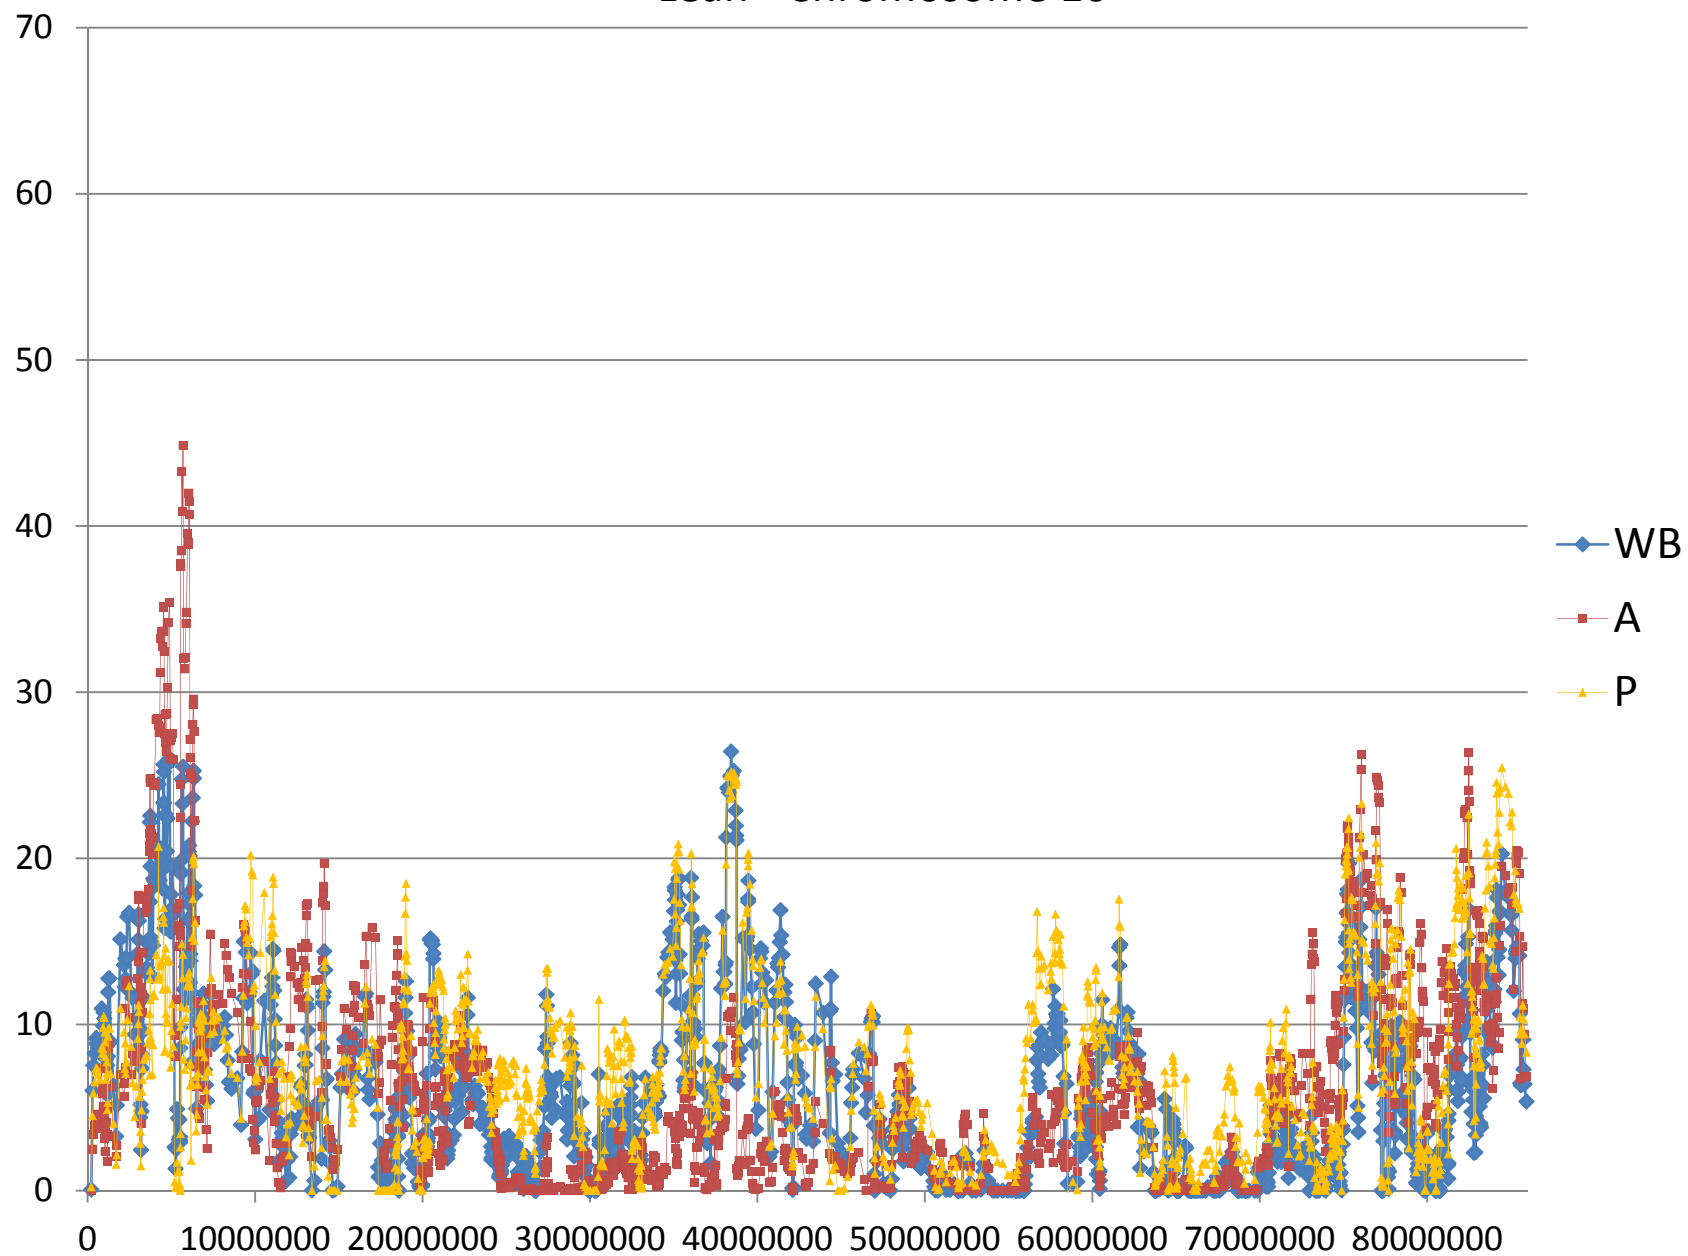



Lean - Chromosome 17

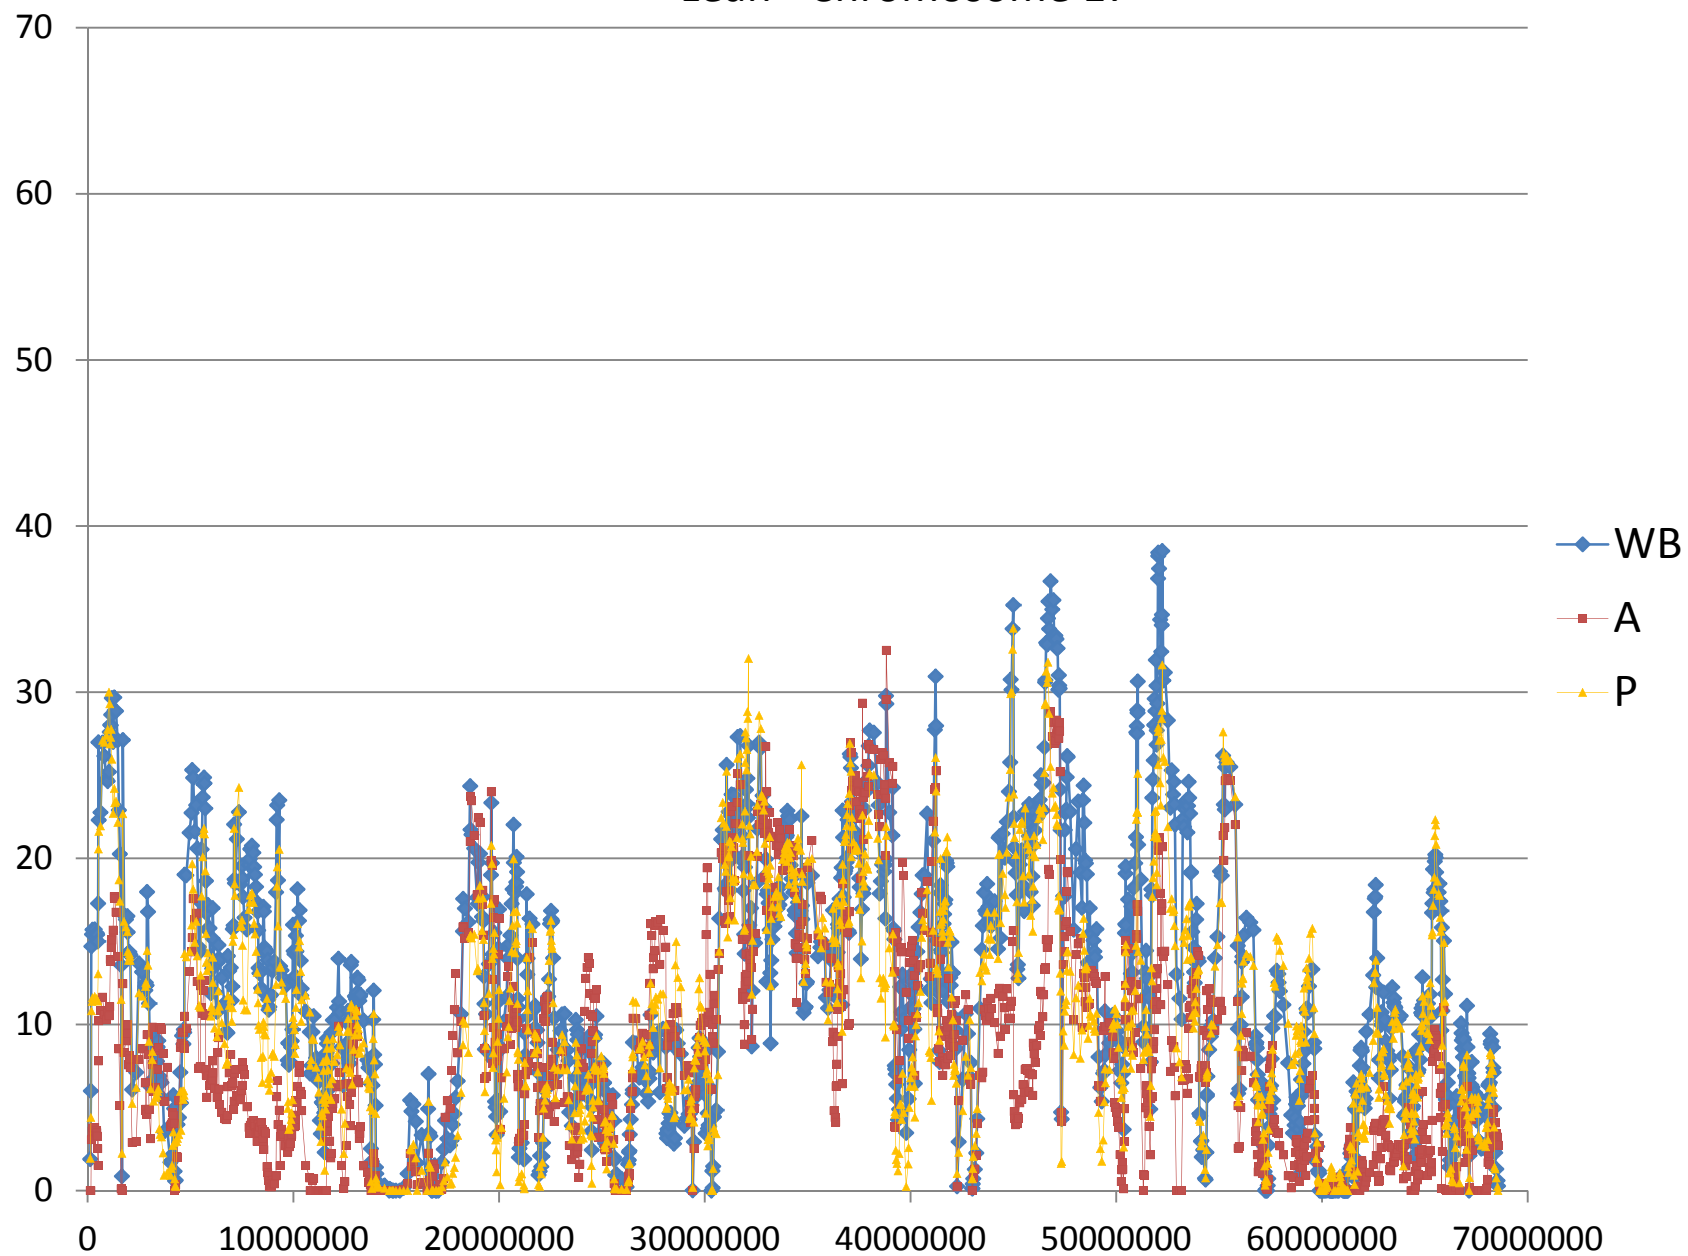

# Lean - Chromosome 18

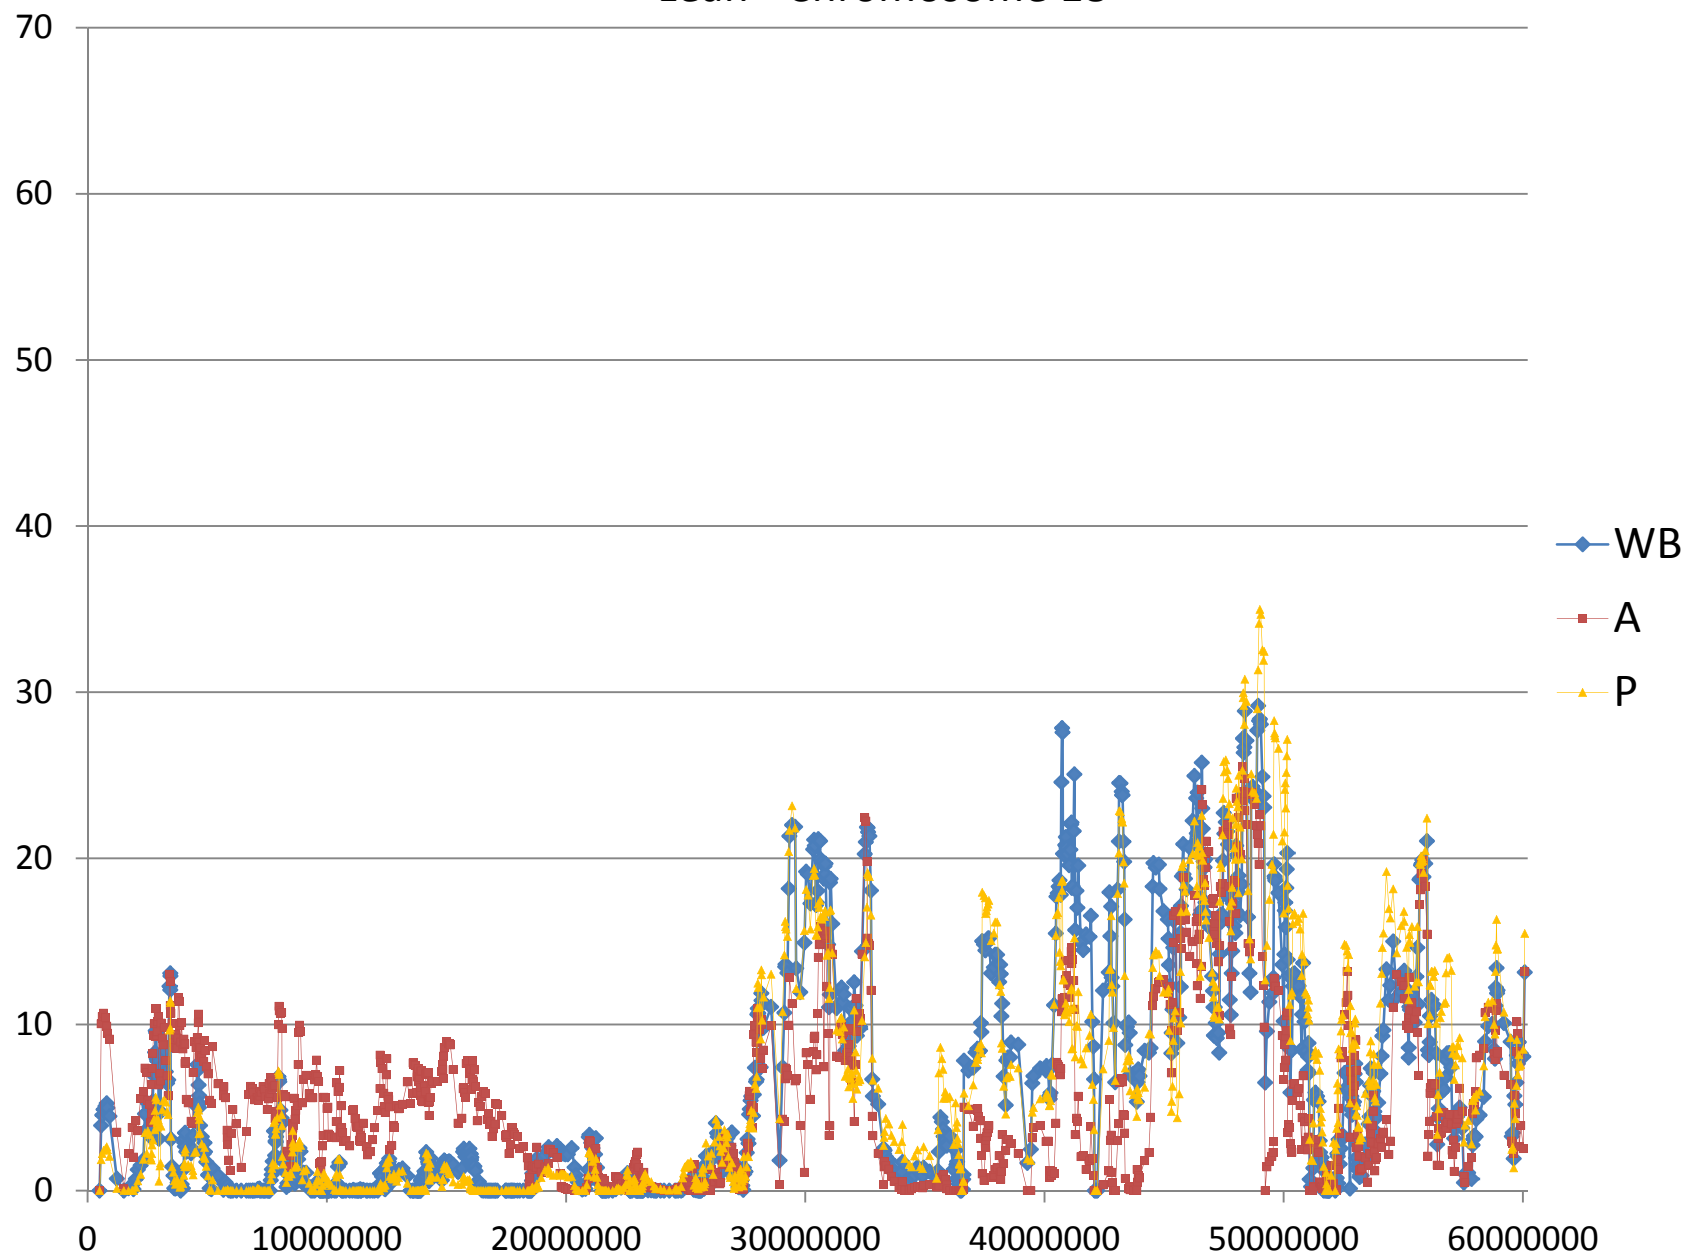

Supplement: Supplementary file 6 [file aab-60-51-2017-supplement.zip]
