# Supplementary material for: Genome-wide QTL mapping results for regional DXA body composition and bone mineral density traits in pigs
Source: Copernicus journal article supplement (doi:10.5194/aab-60-51-2017), 2017-04-05

# BMCPC - Chromosome 1

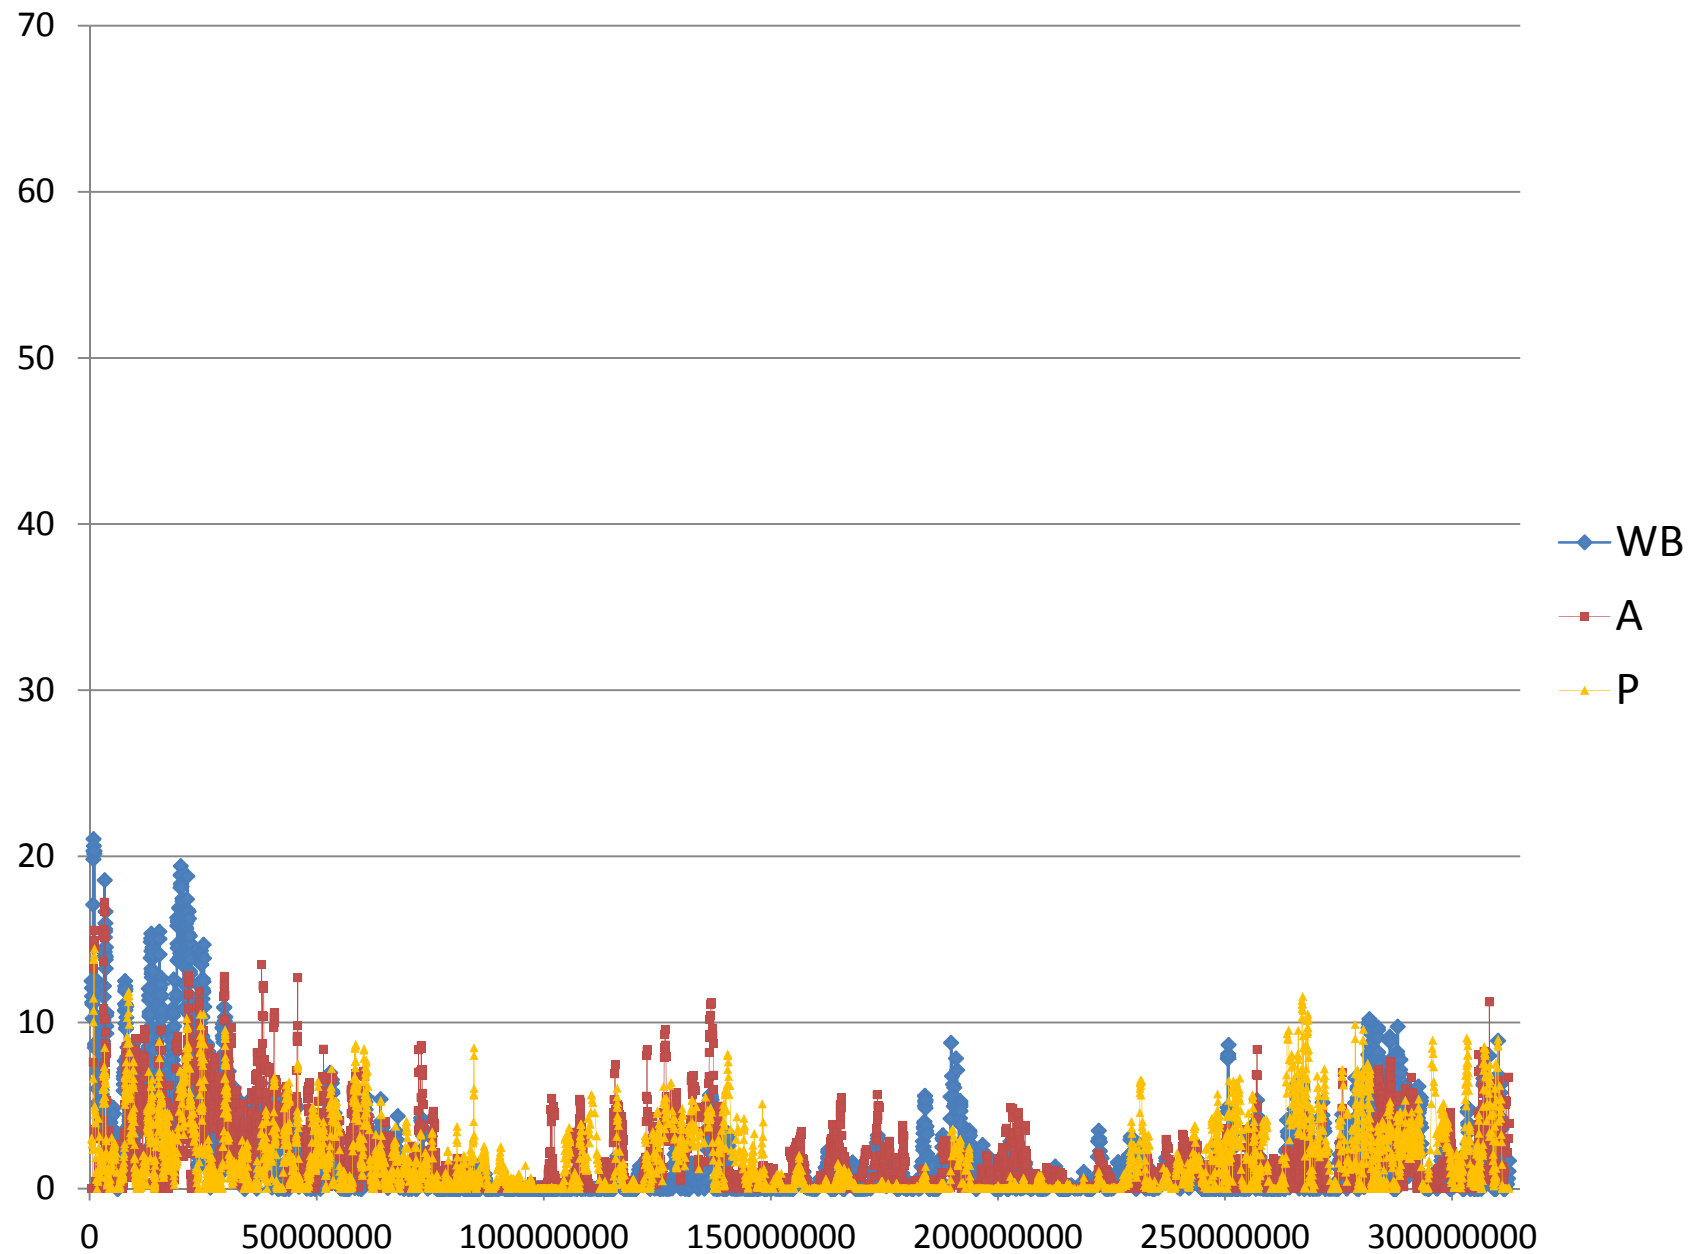

# BMCPC - Chromosome 2

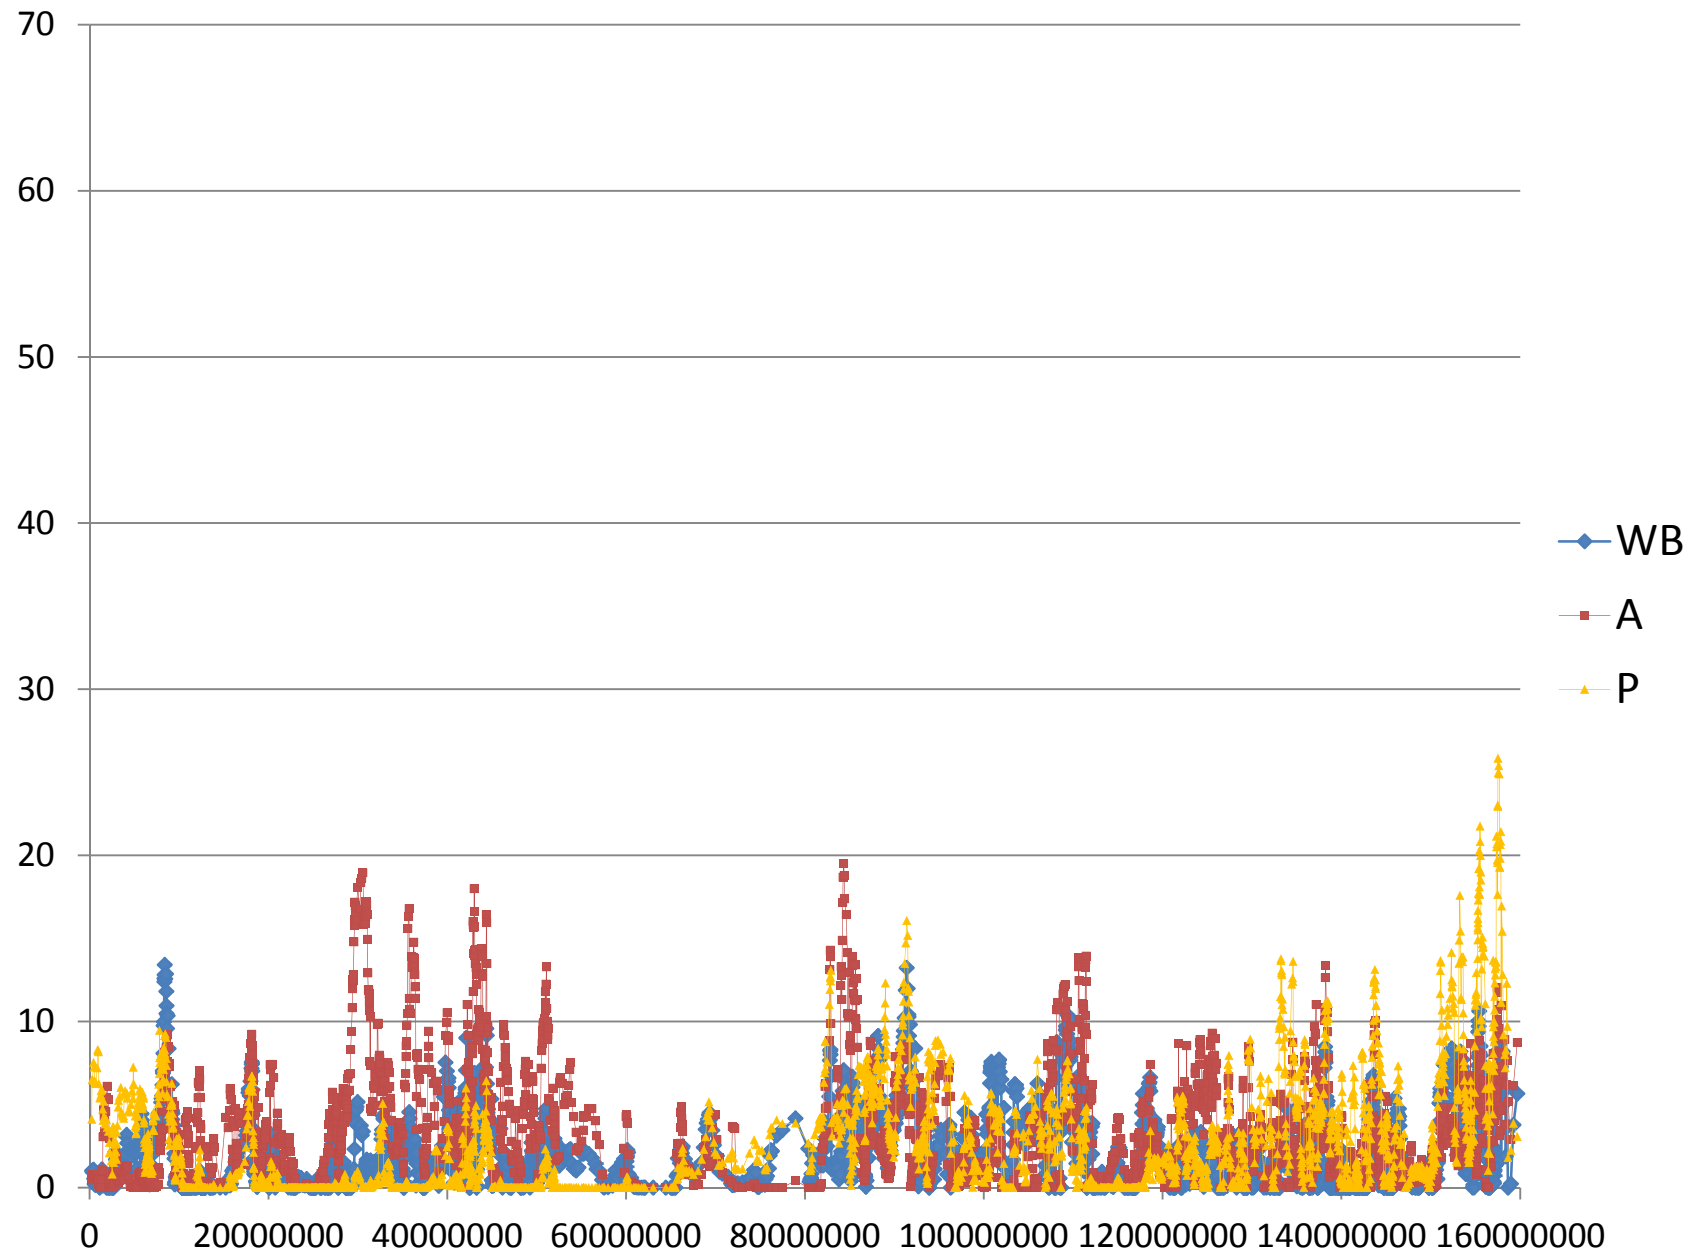

# BMCPC - Chromosome 3

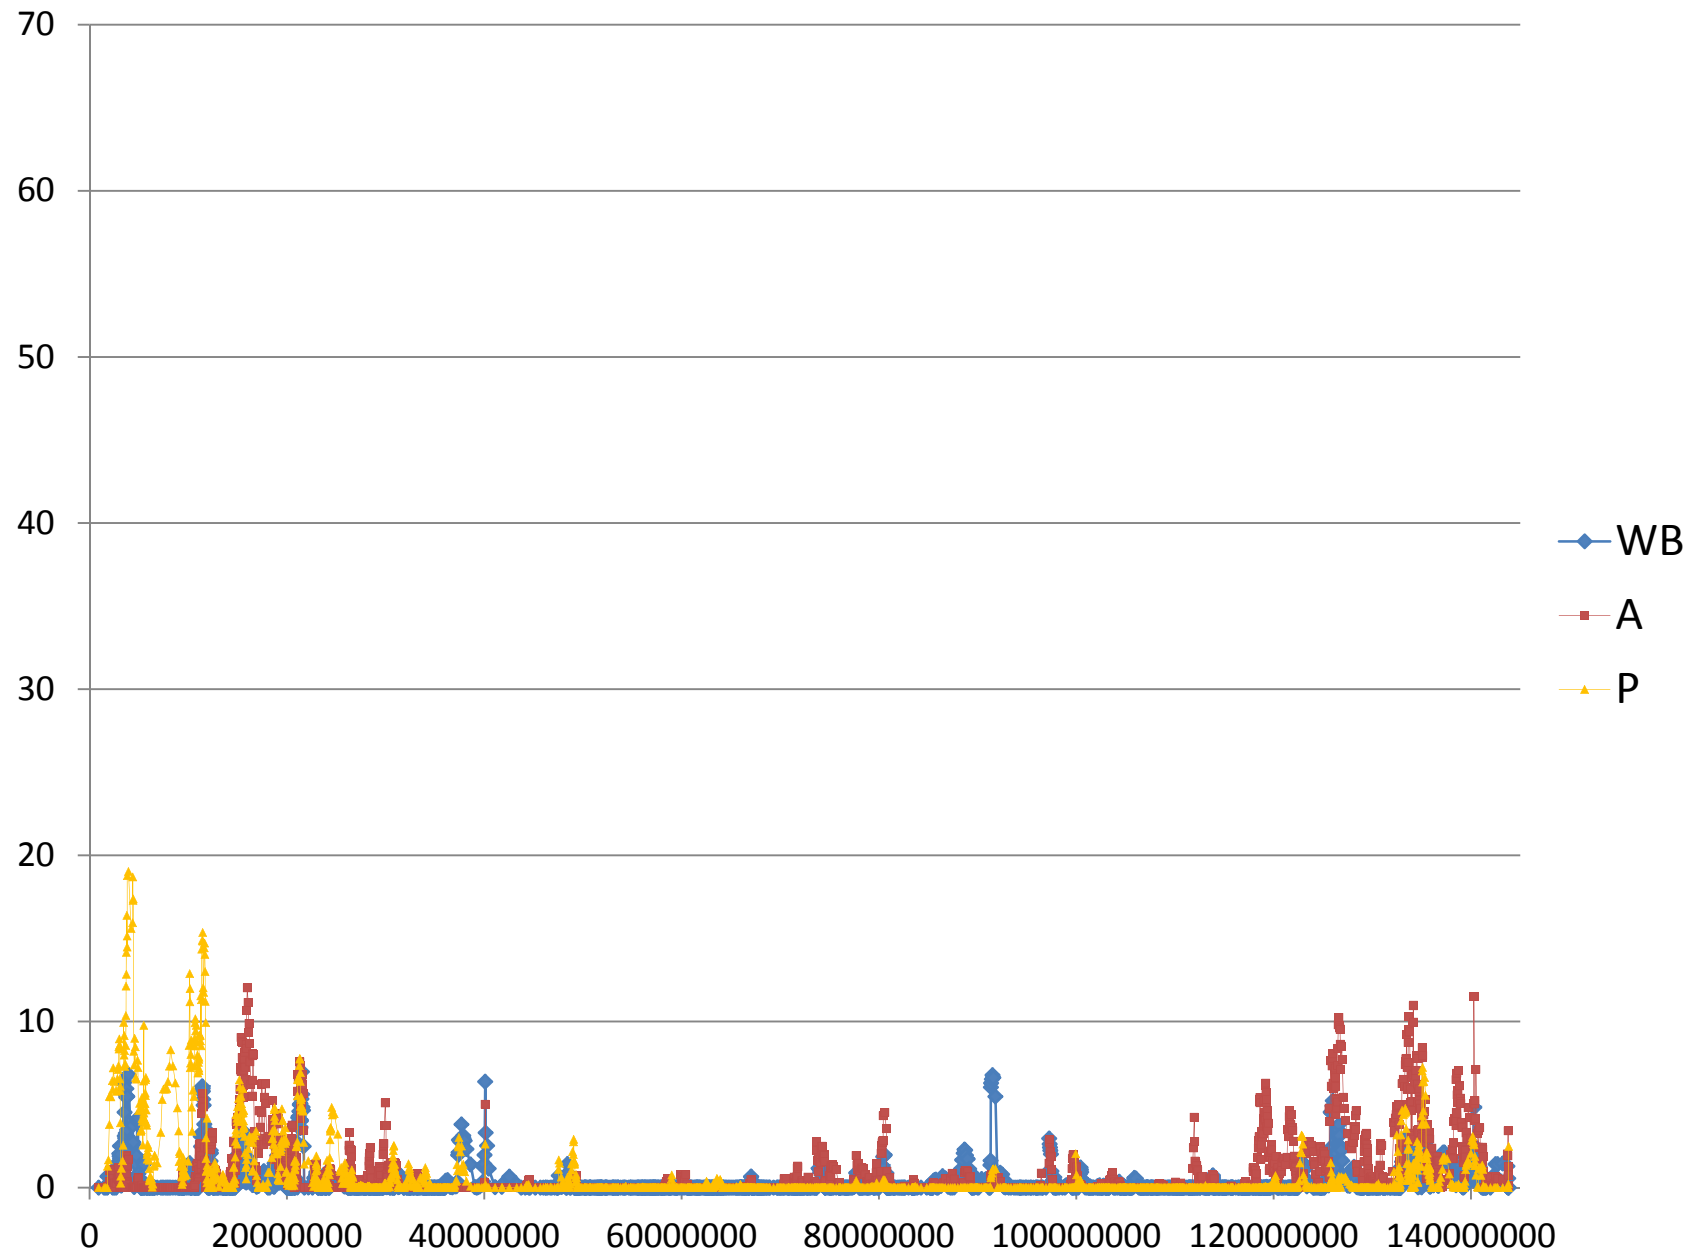

# BMCPC - Chromosome 4

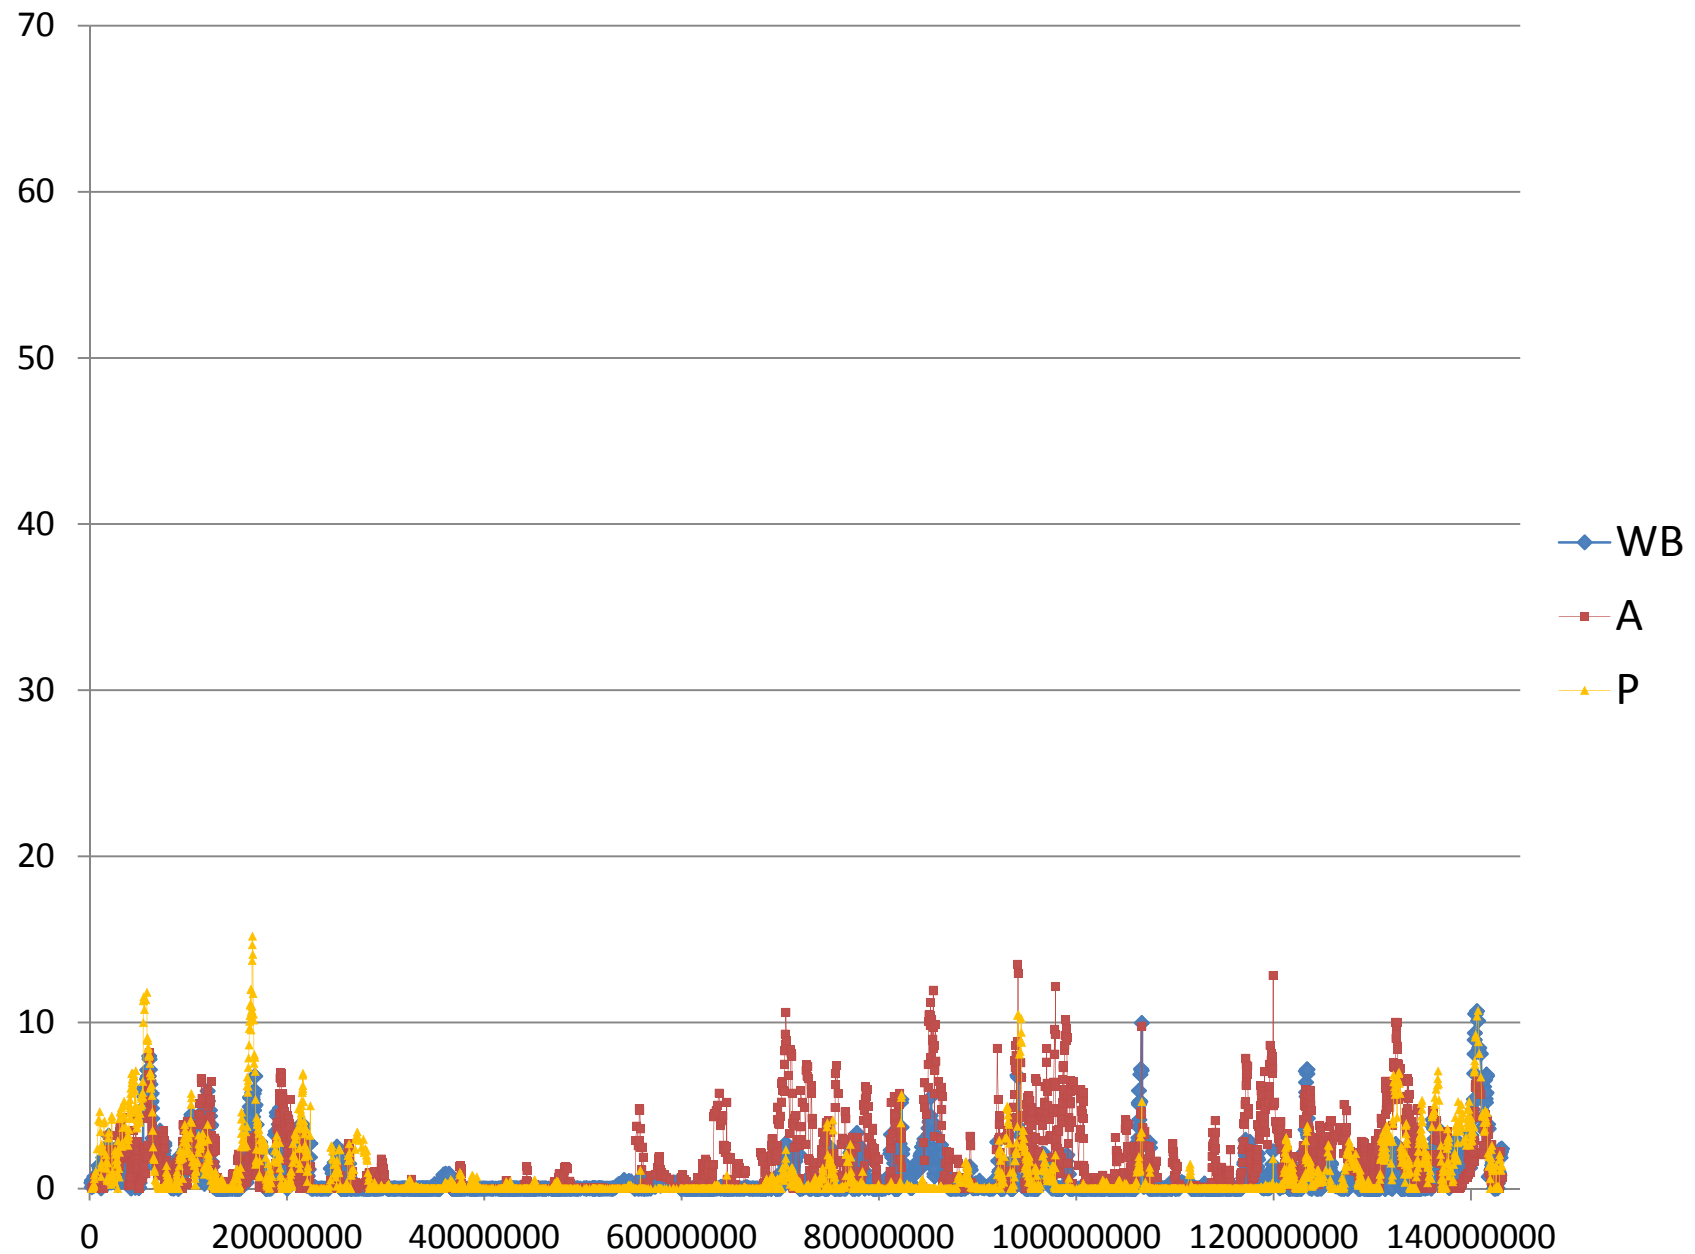

# BMCPC - Chromosome 5

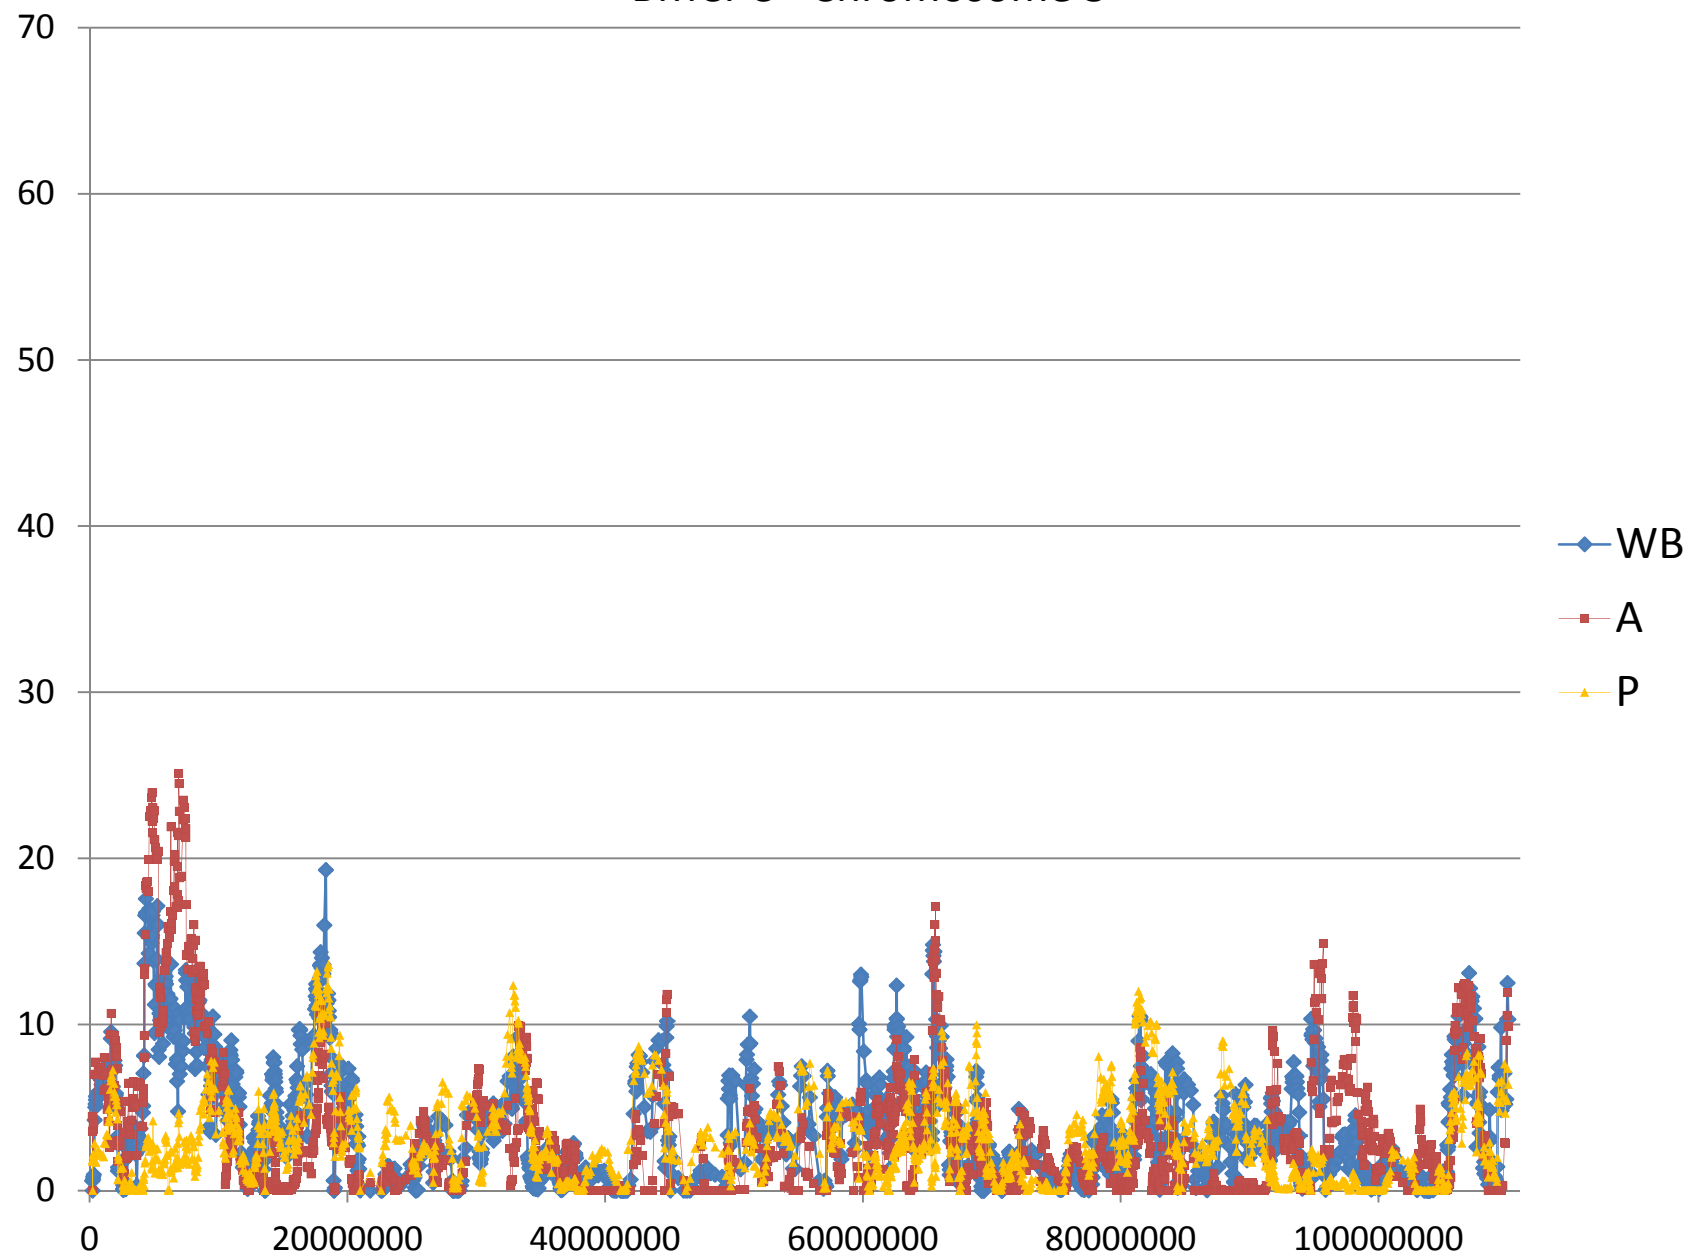

# BMCPC - Chromosome 6

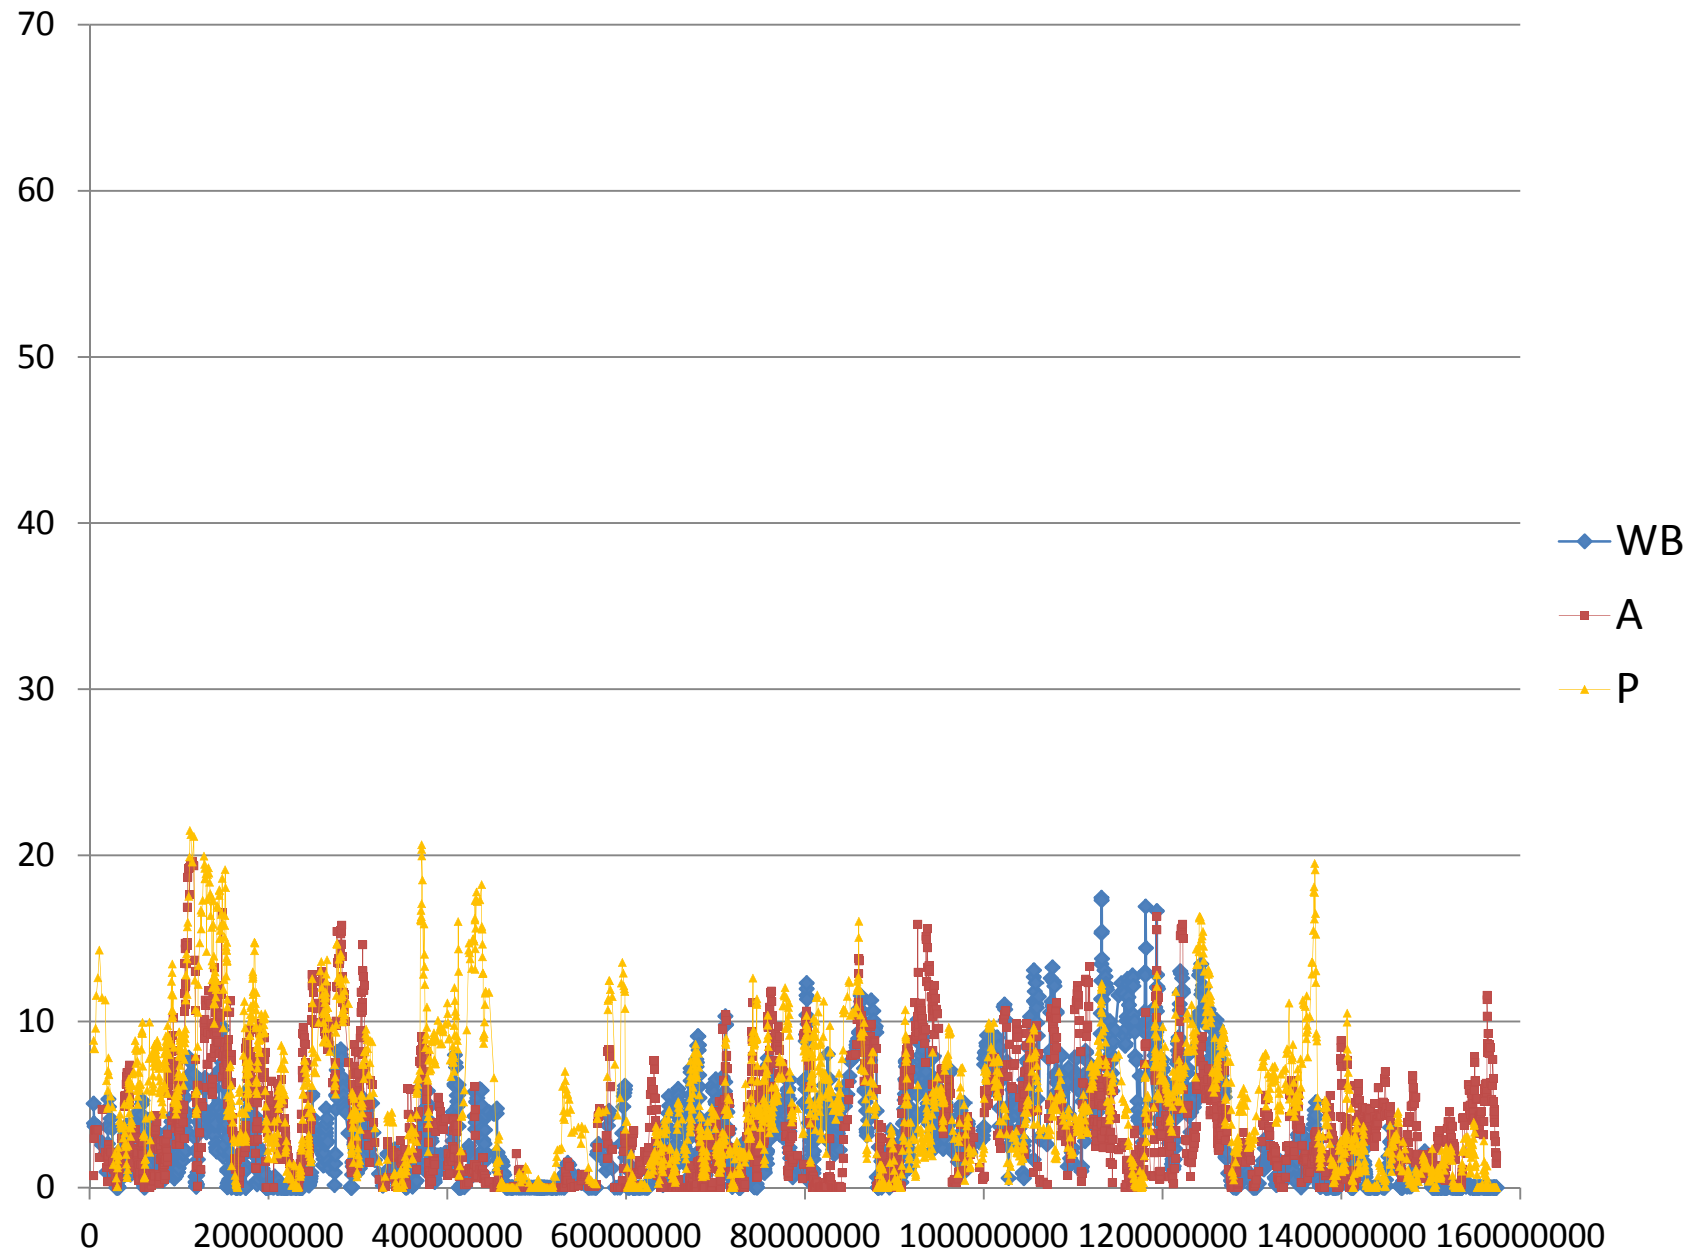

# BMCPC - Chromosome 7

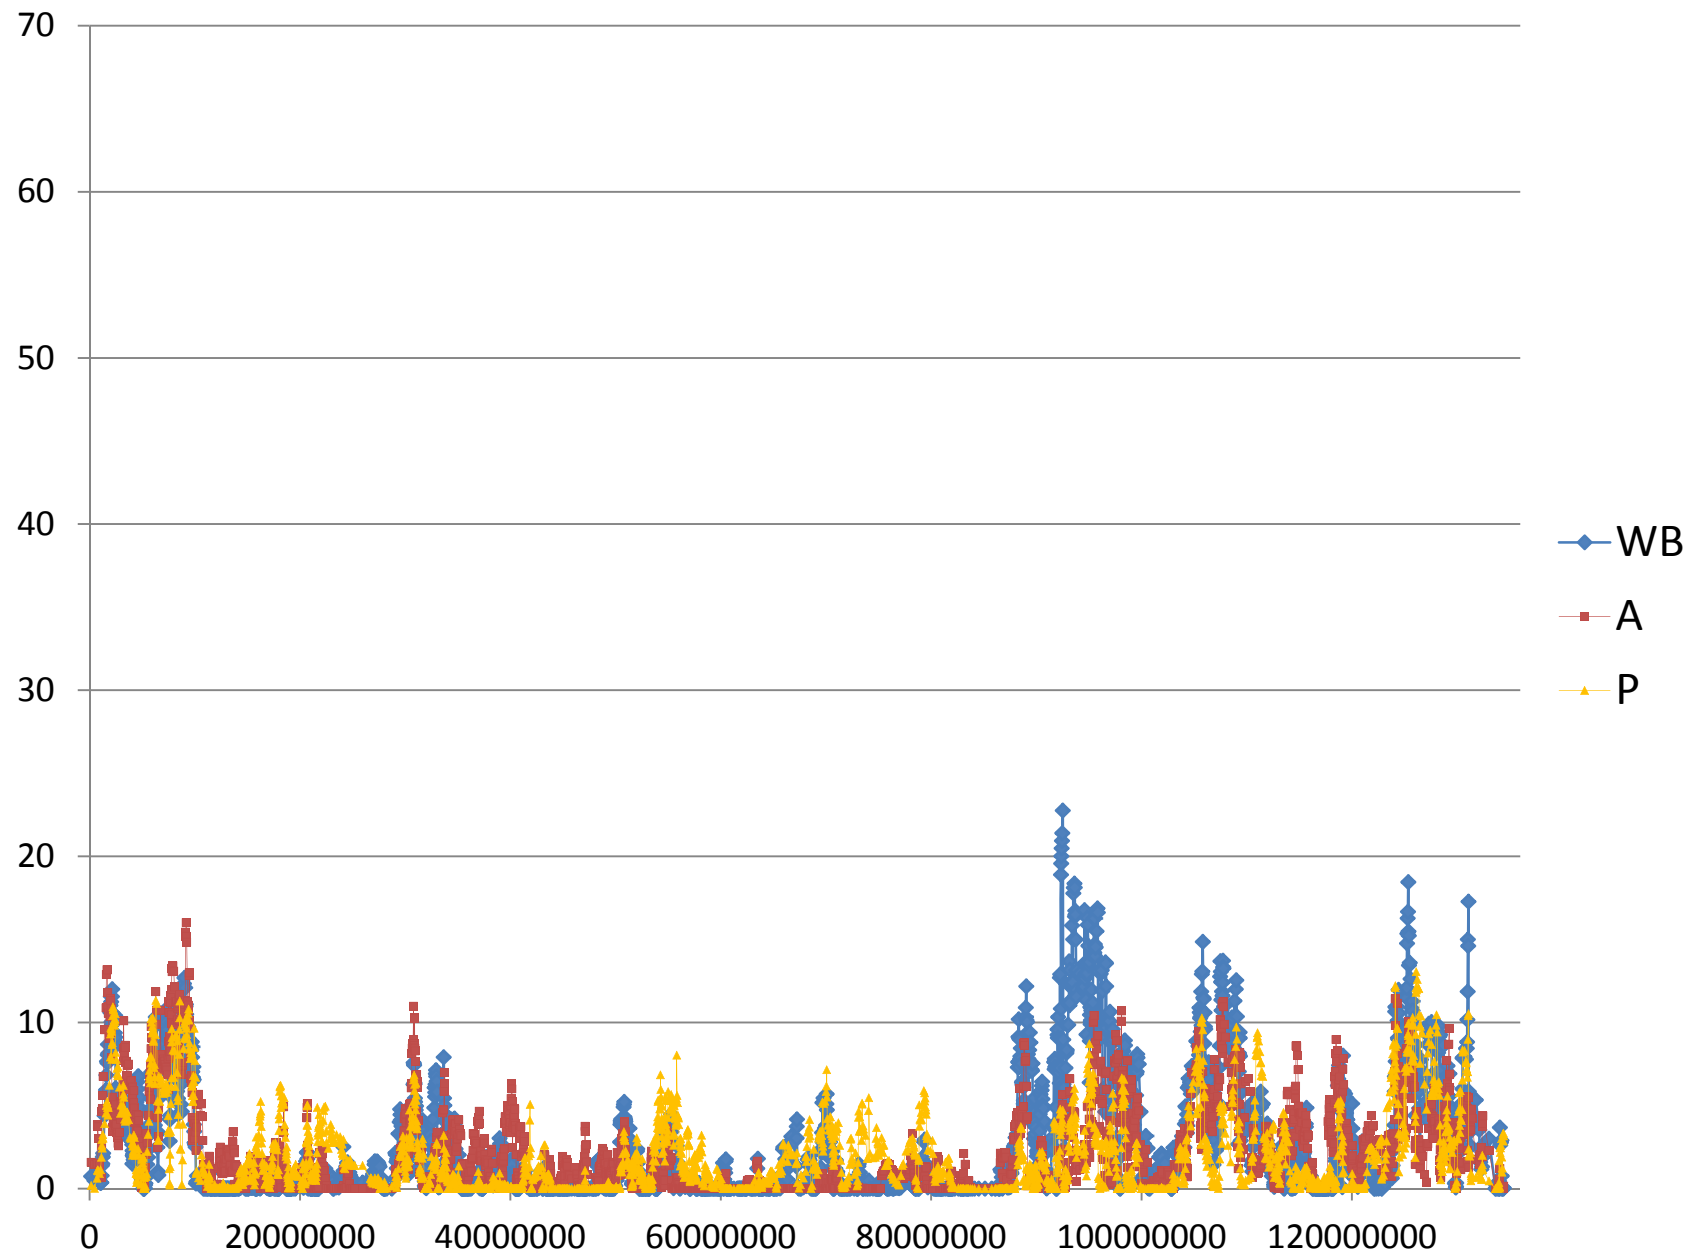

BMCPC - Chromosome 8

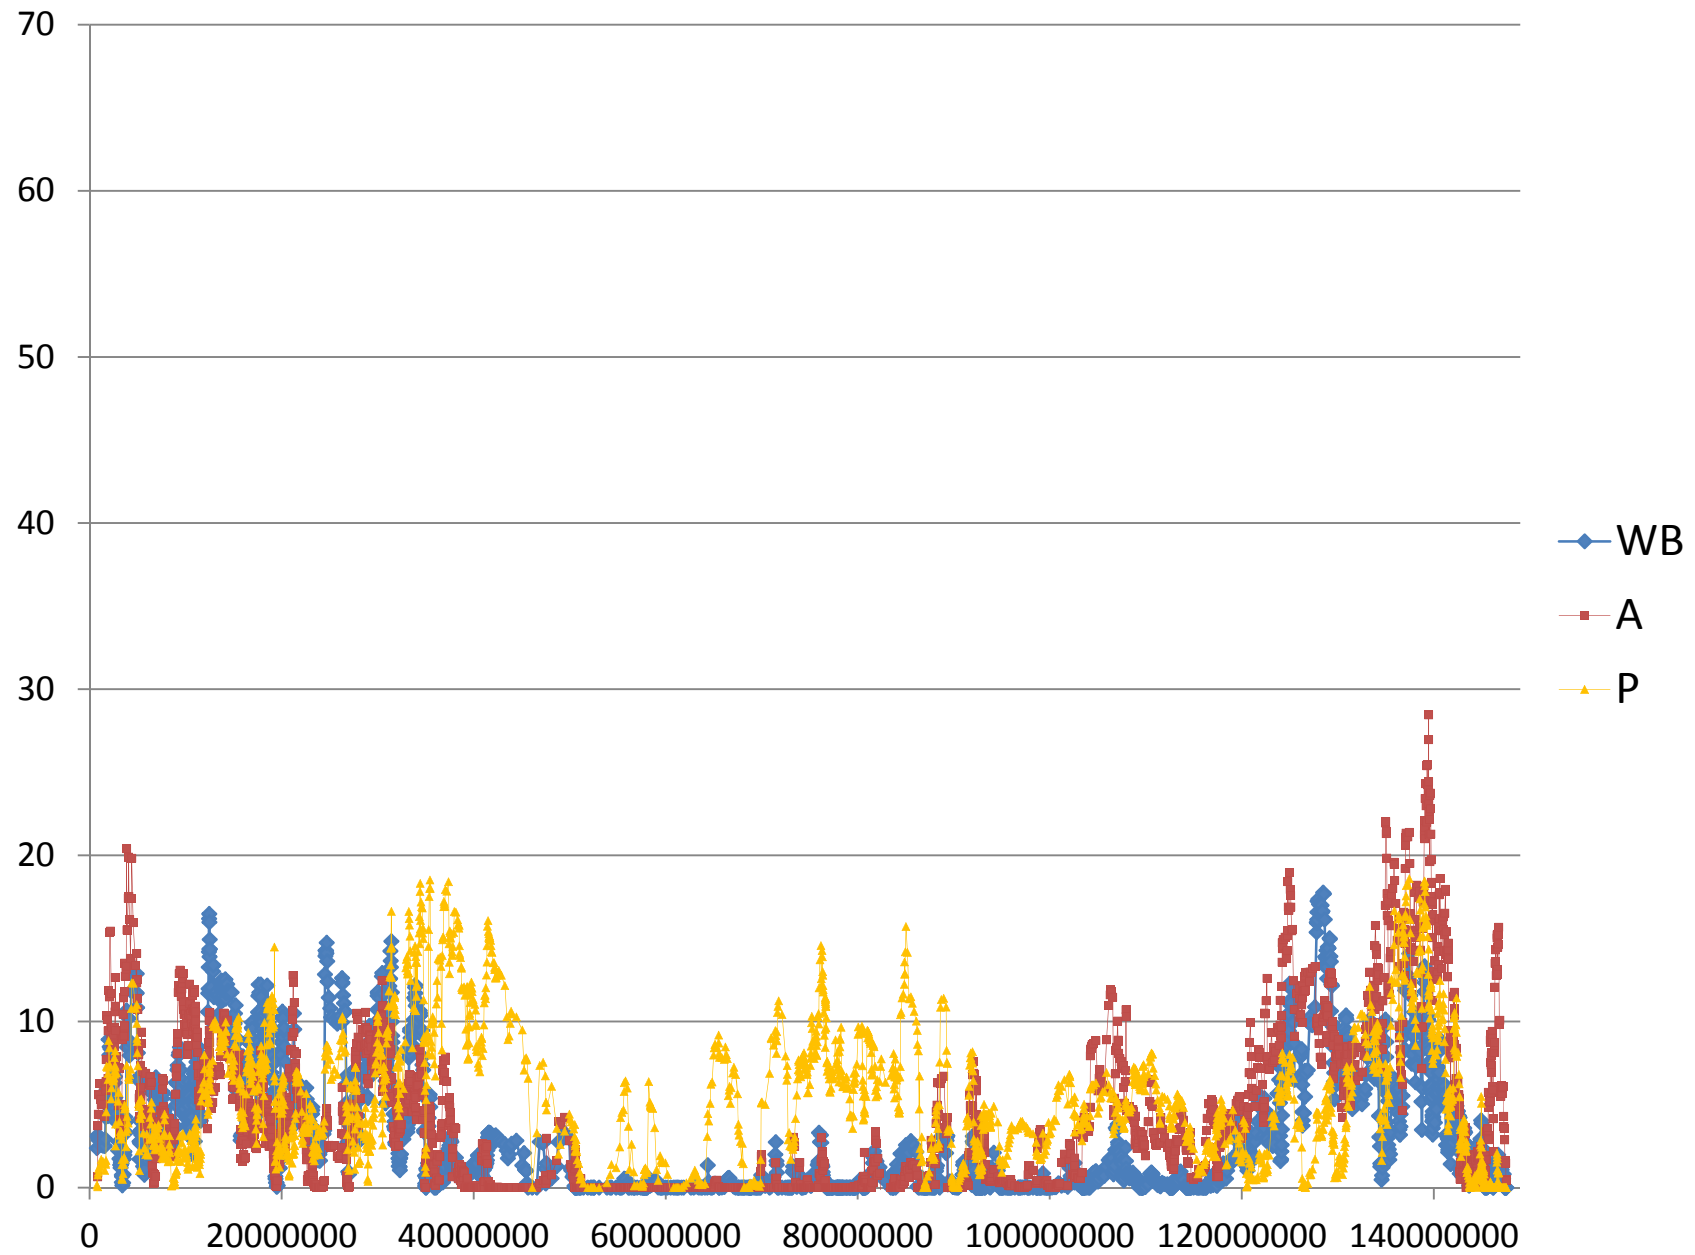



# BMCP - Chromosome 9

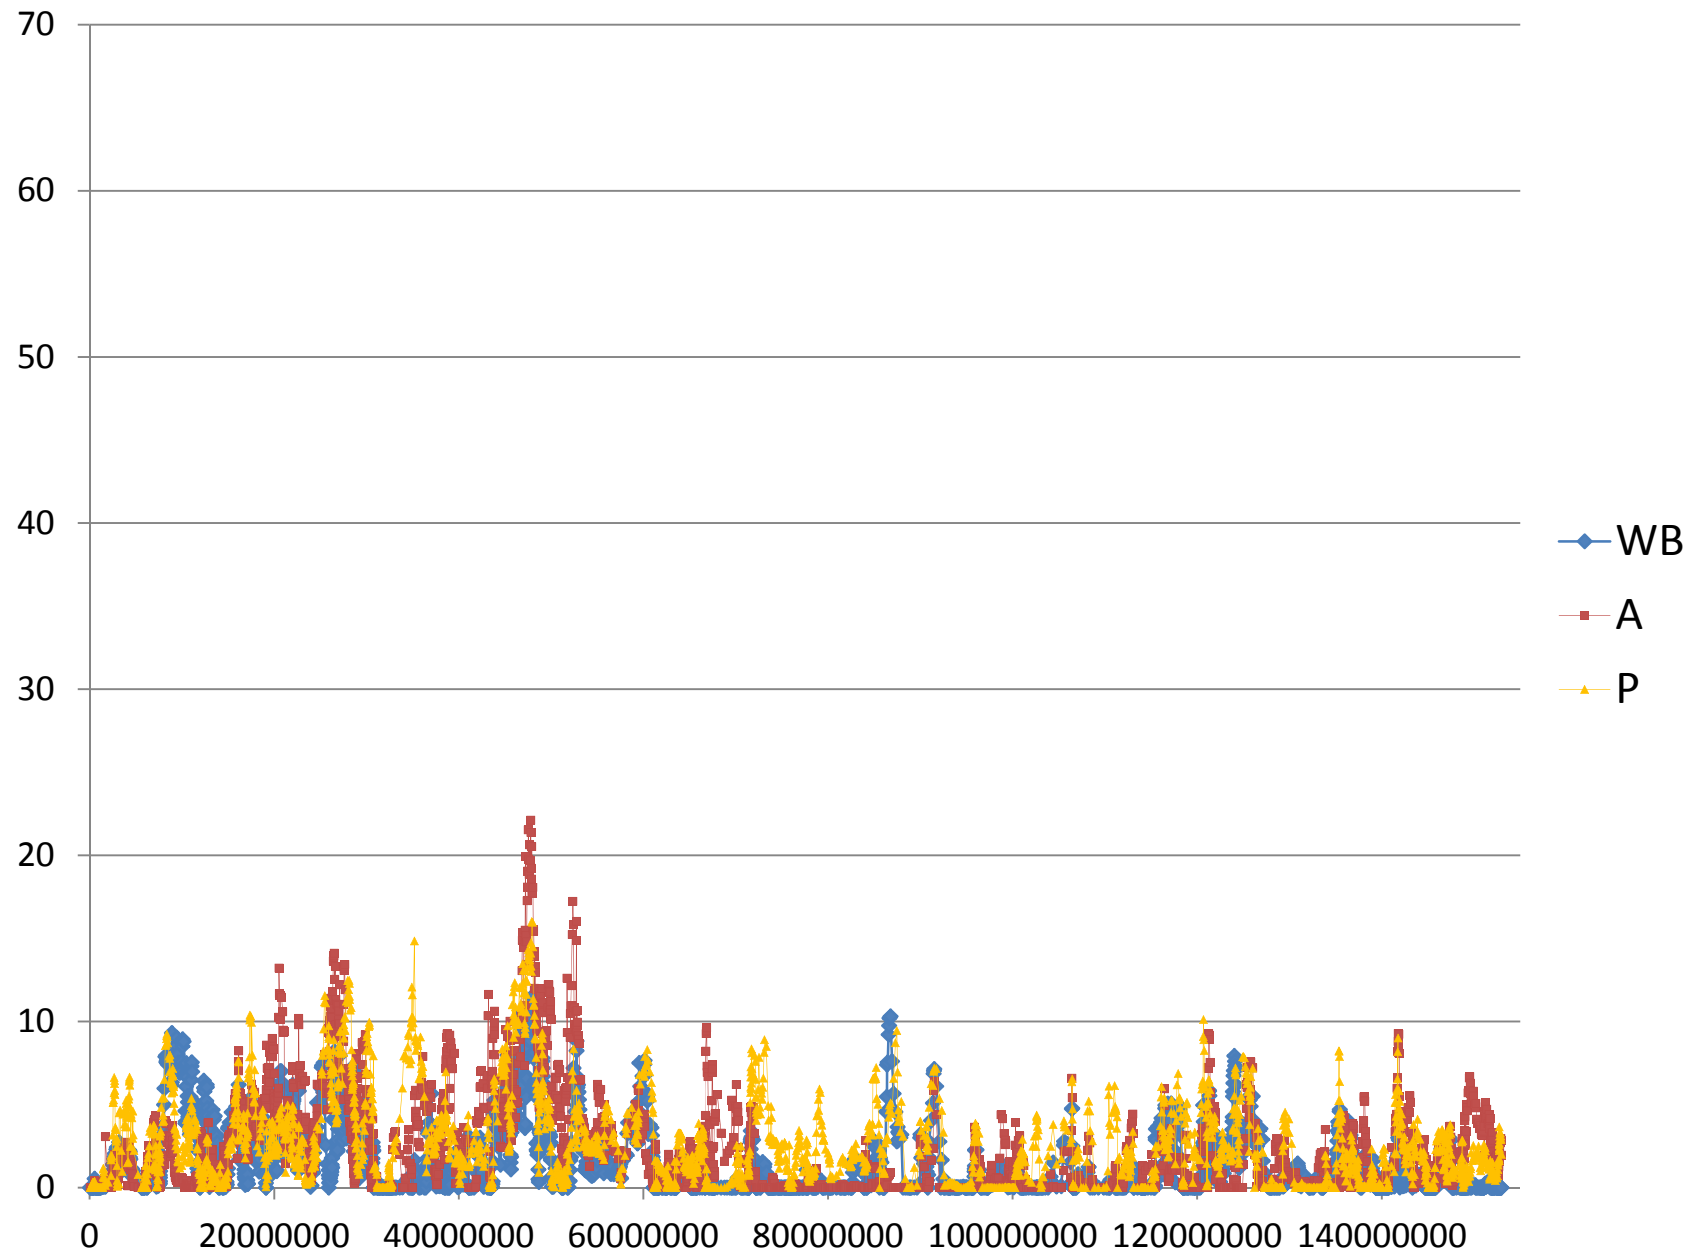

# BMCPC - Chromosome 10

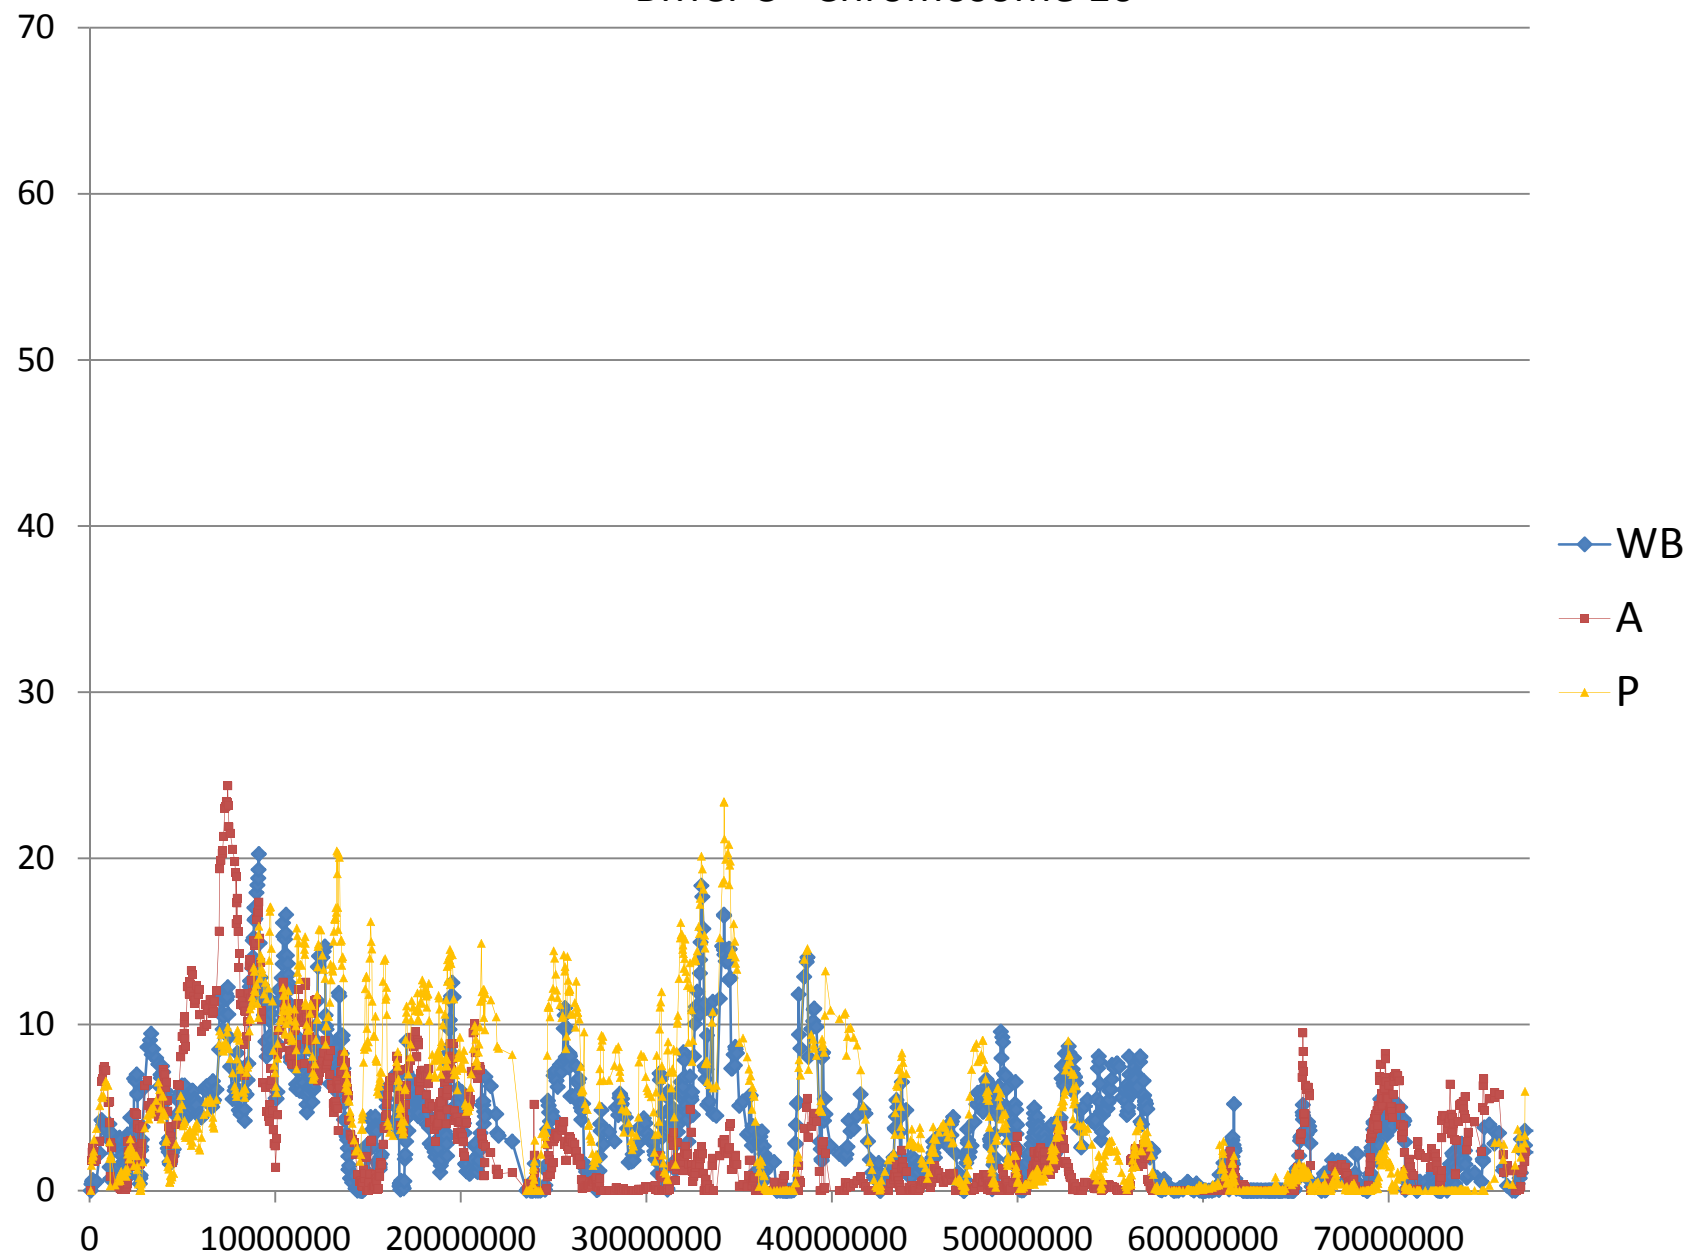

# BMCPC - Chromosome 11

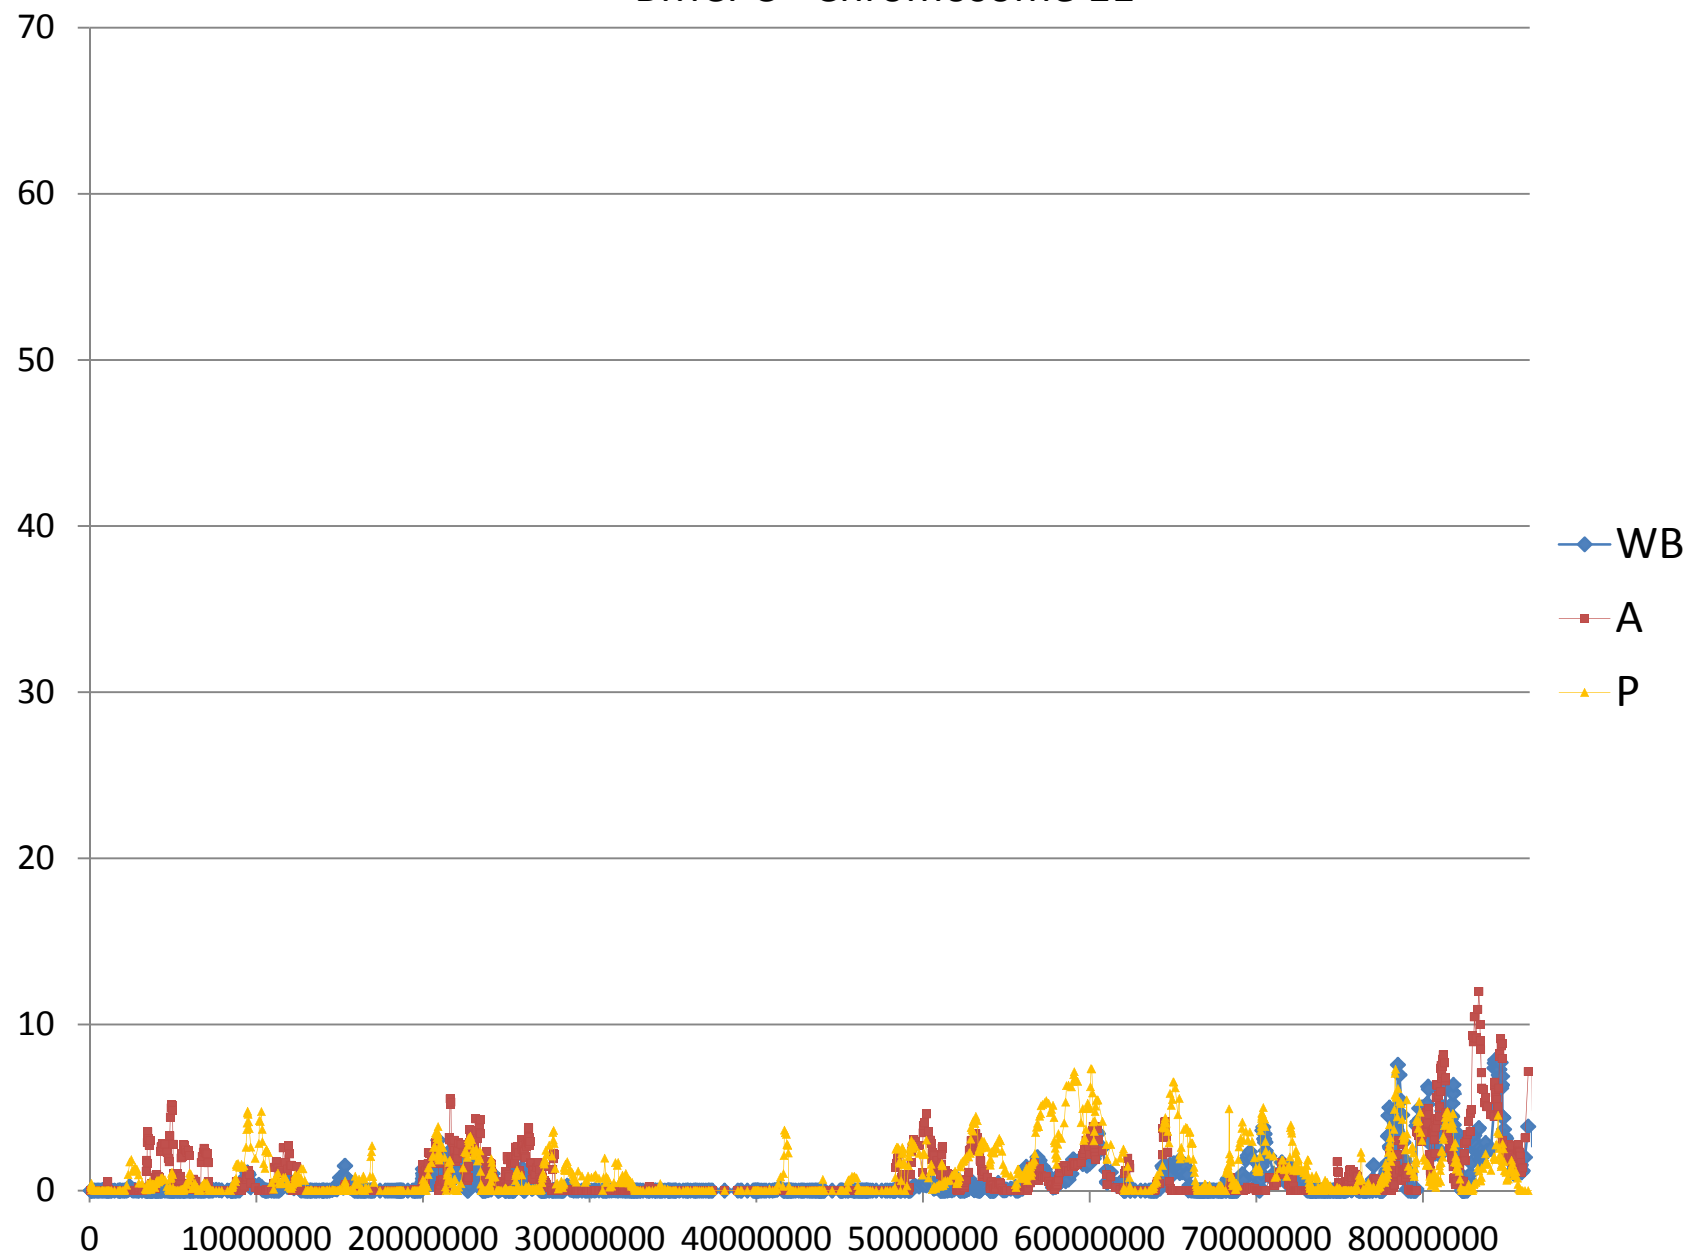

# BMCPC - Chromosome 12

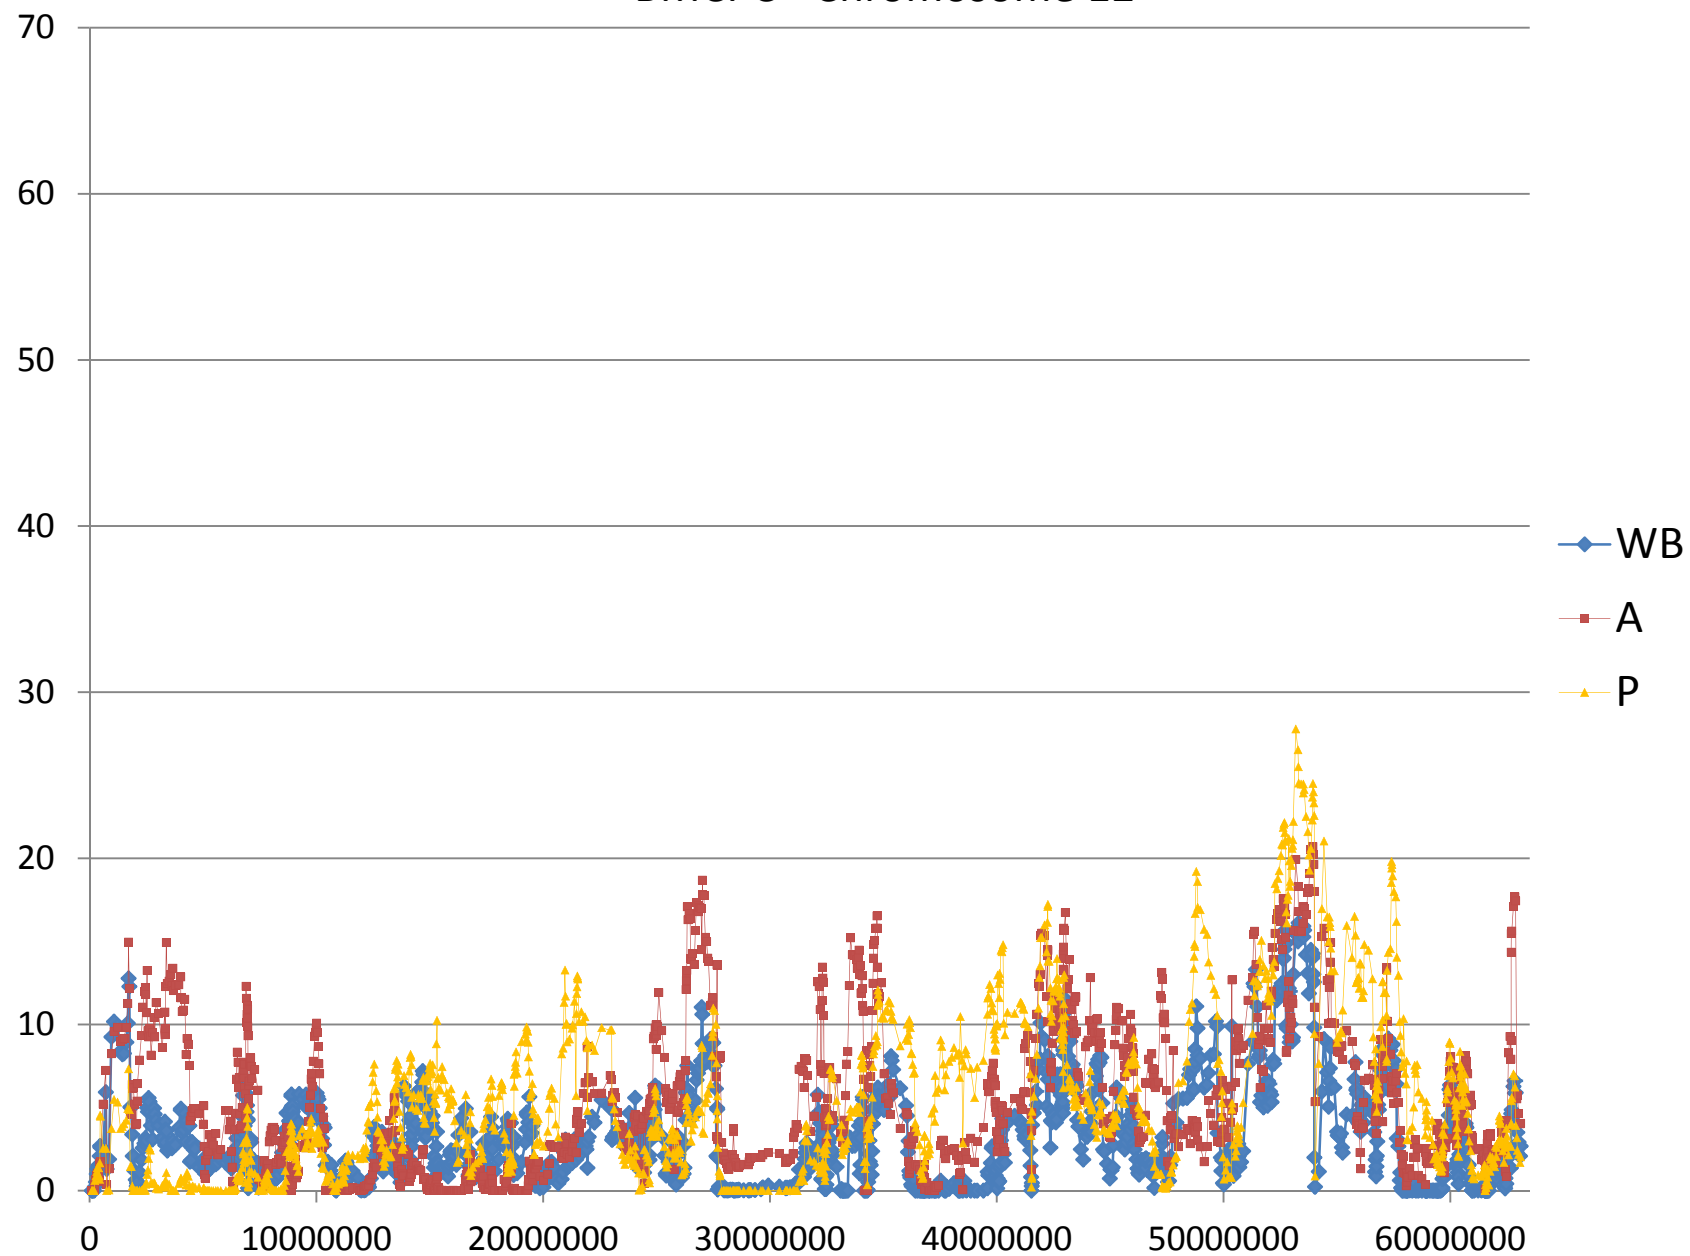

# BMCPC - Chromosome 13

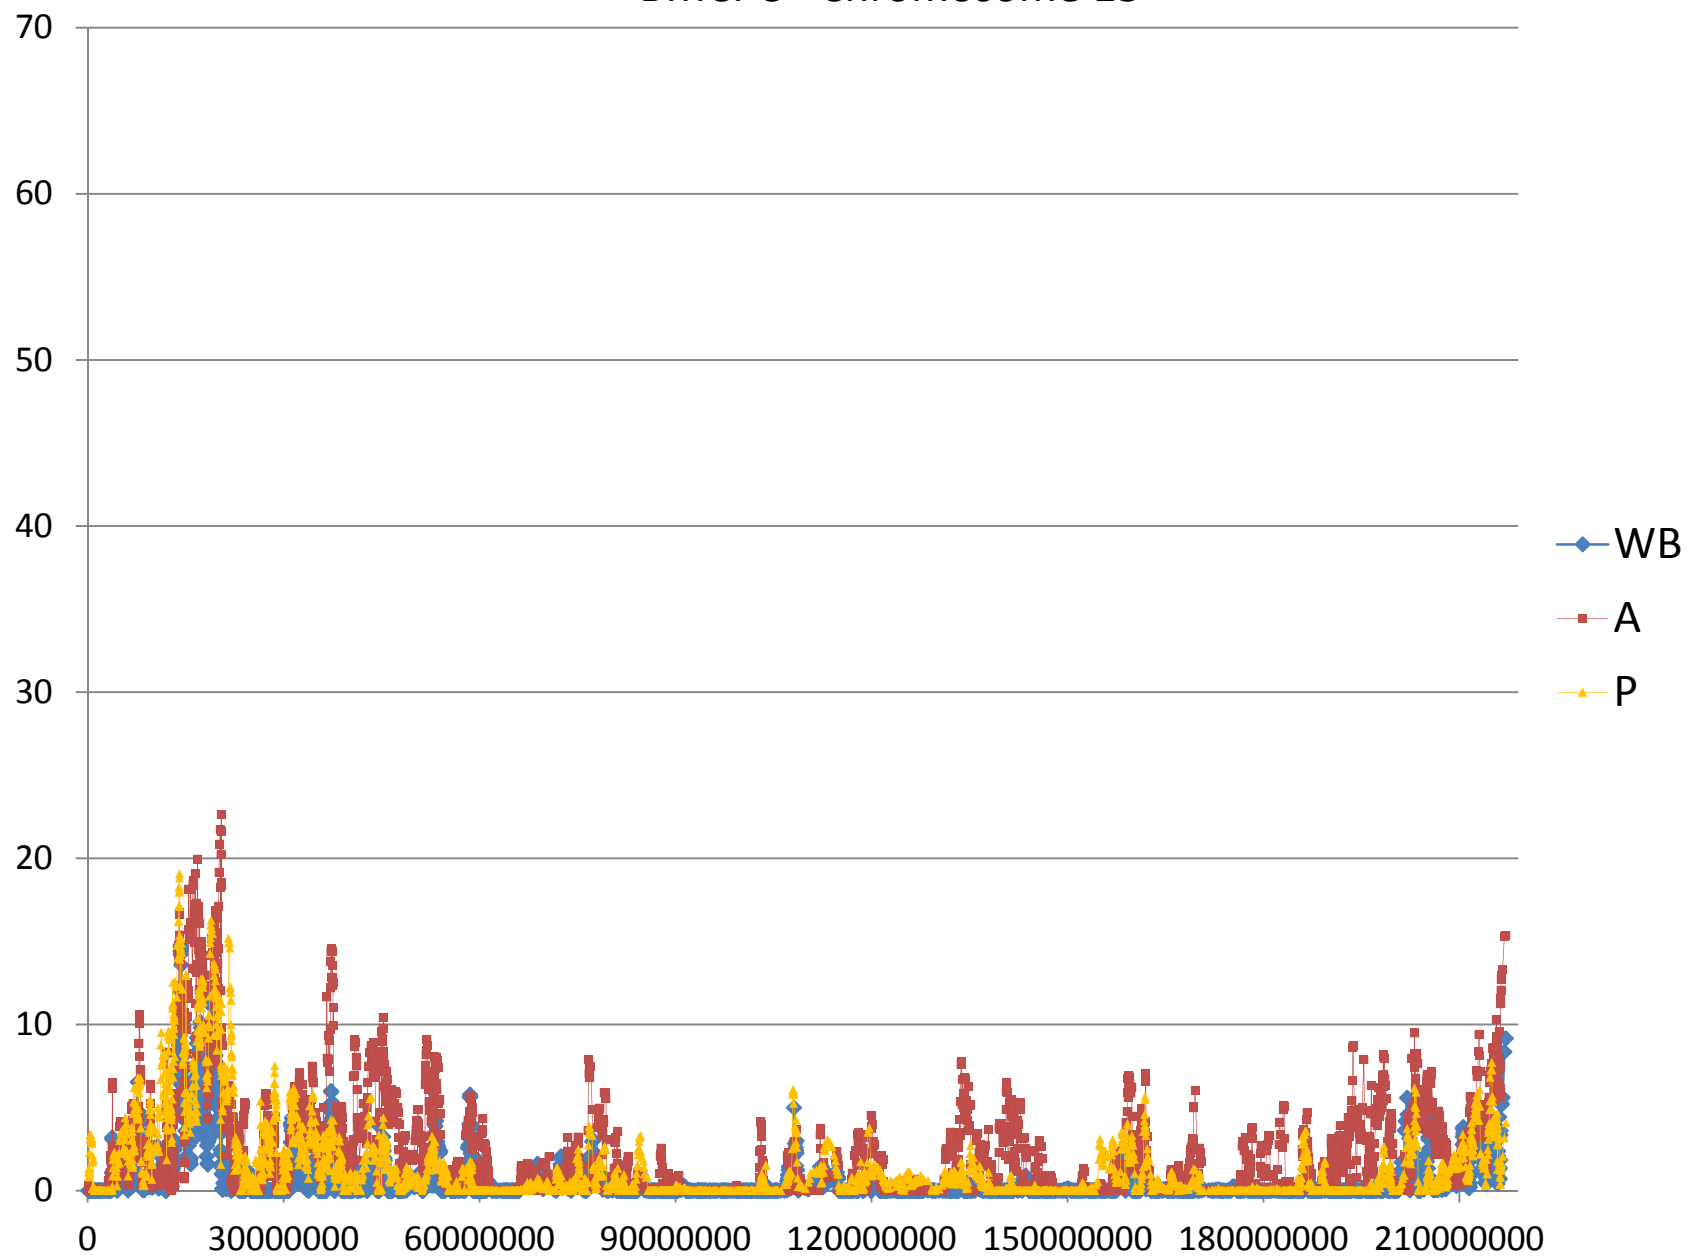

# BMCPC - Chromosome 14

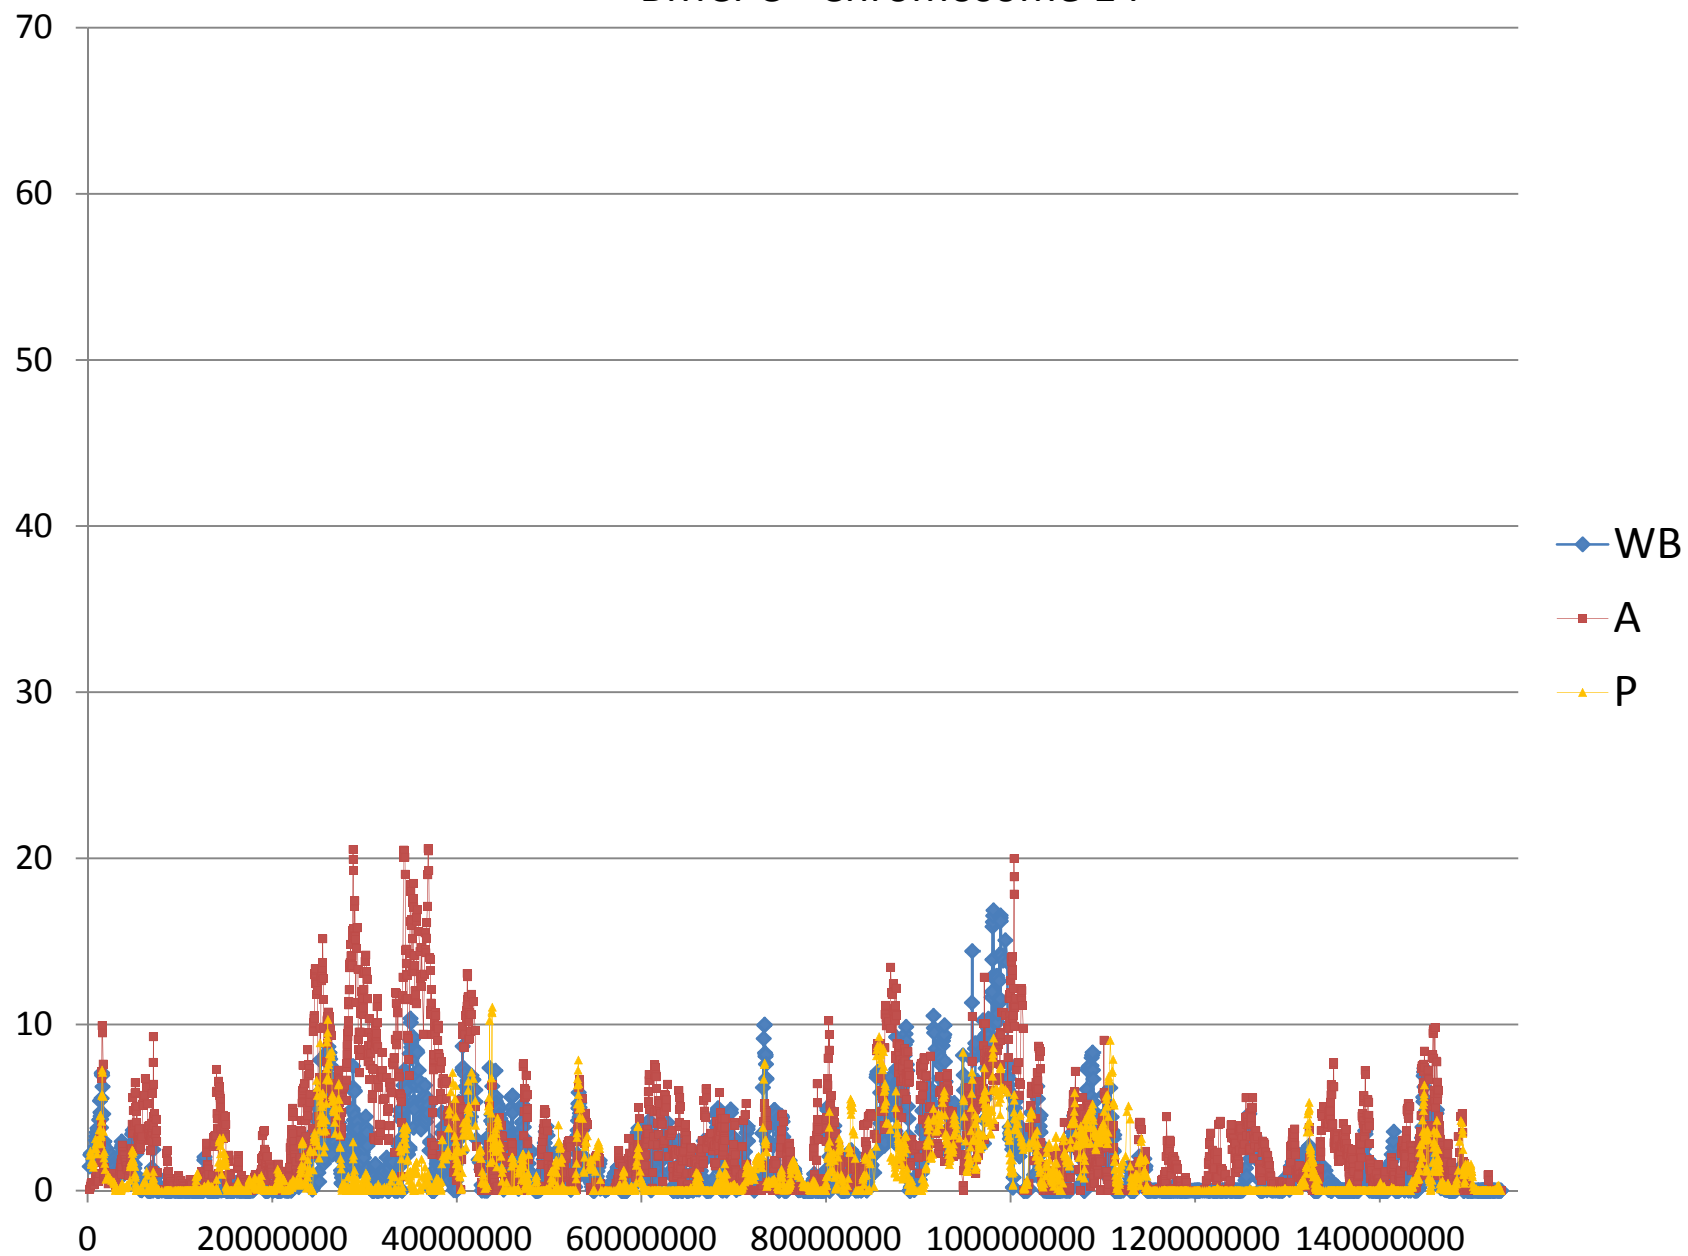

# BMCPC - Chromosome 15

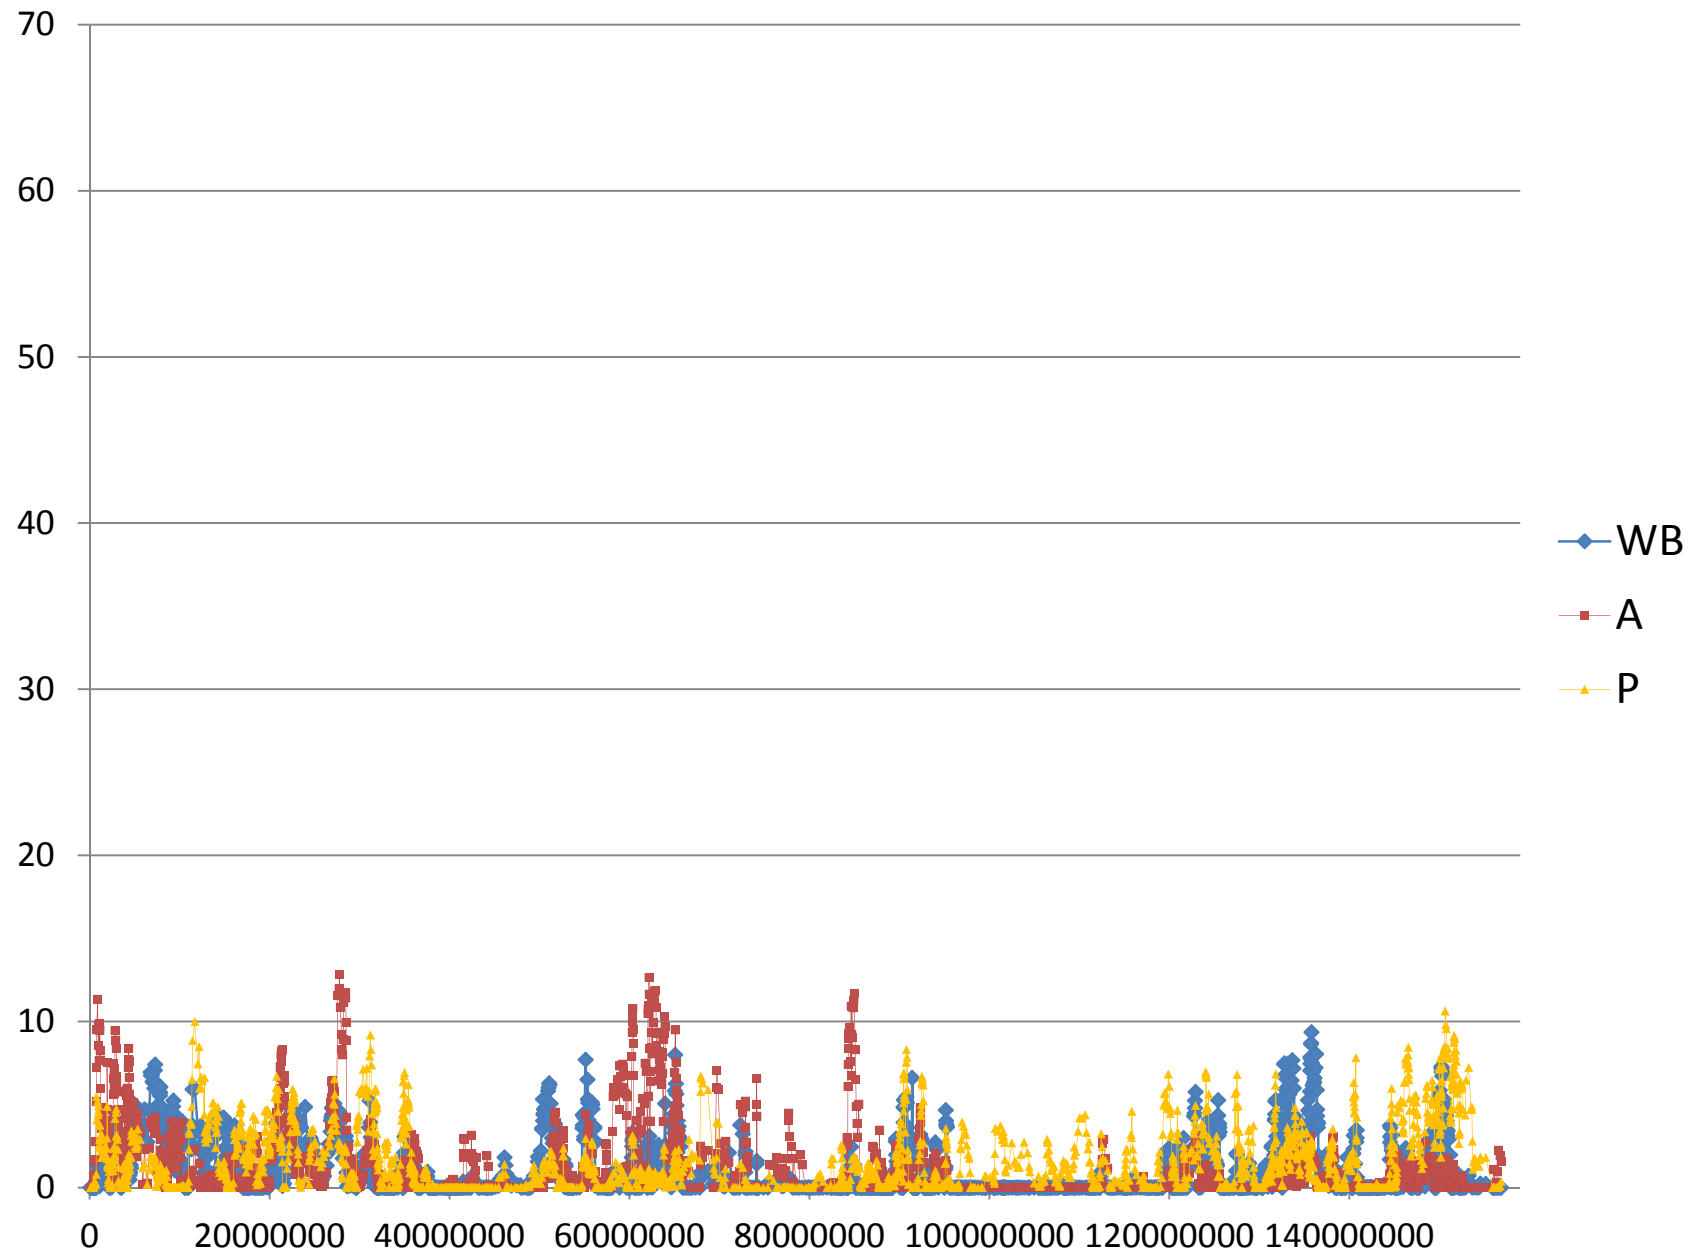

# BMCPC - Chromosome 16

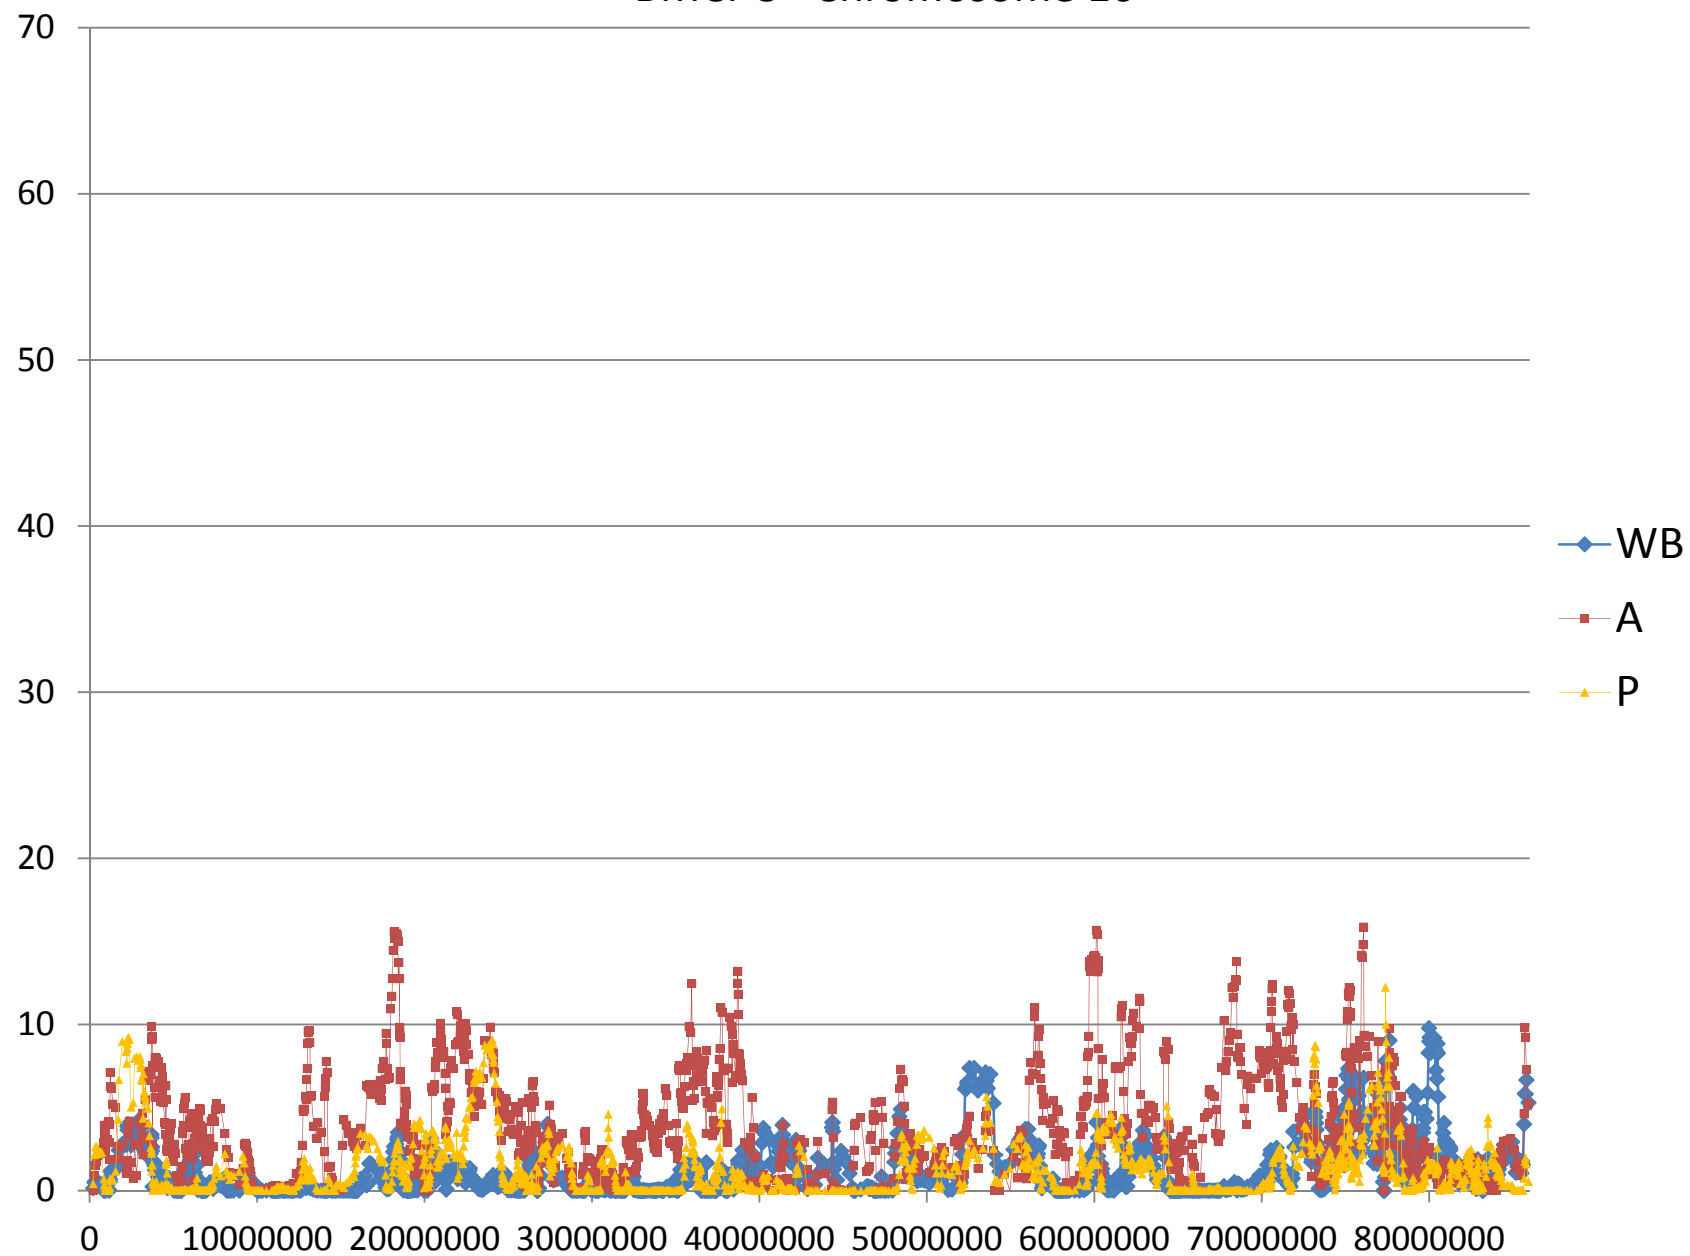



BMCPC - Chromosome 17

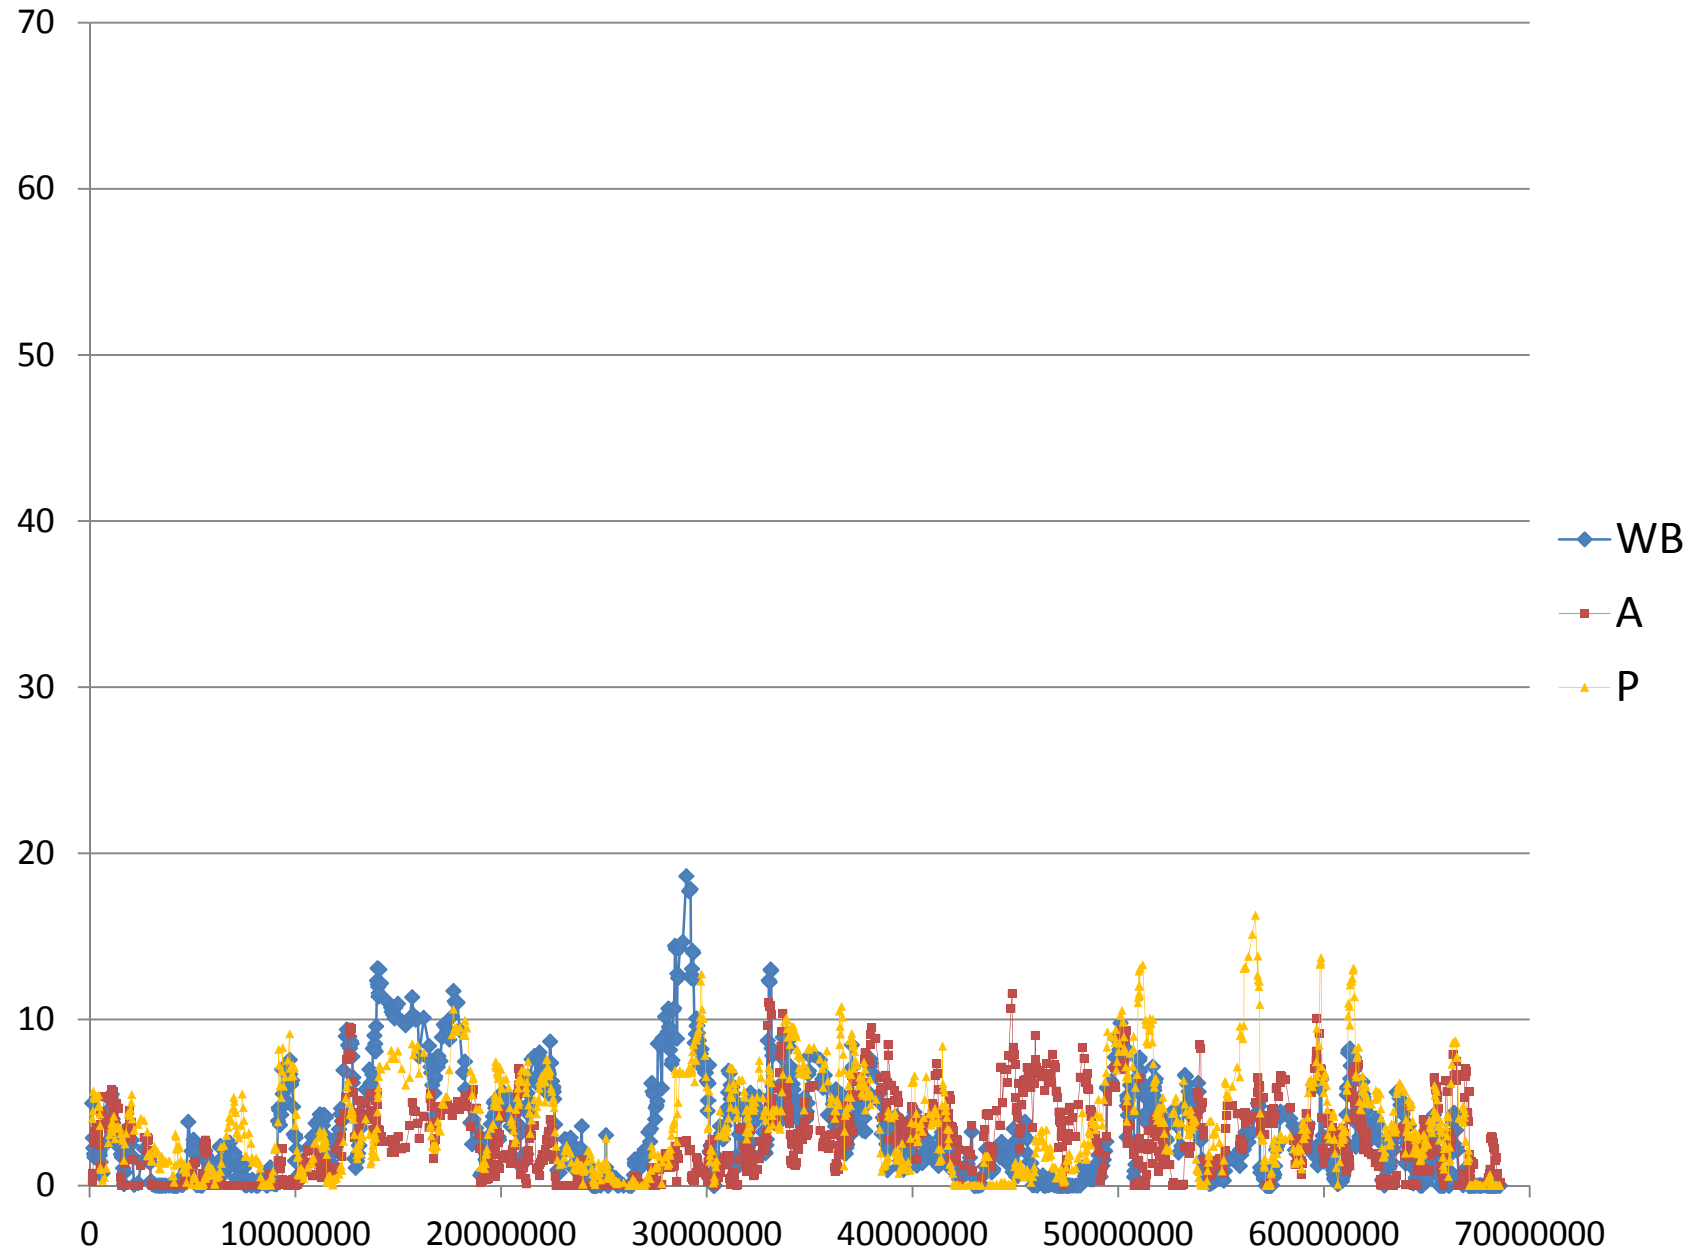

BMCP - Chromosome 18

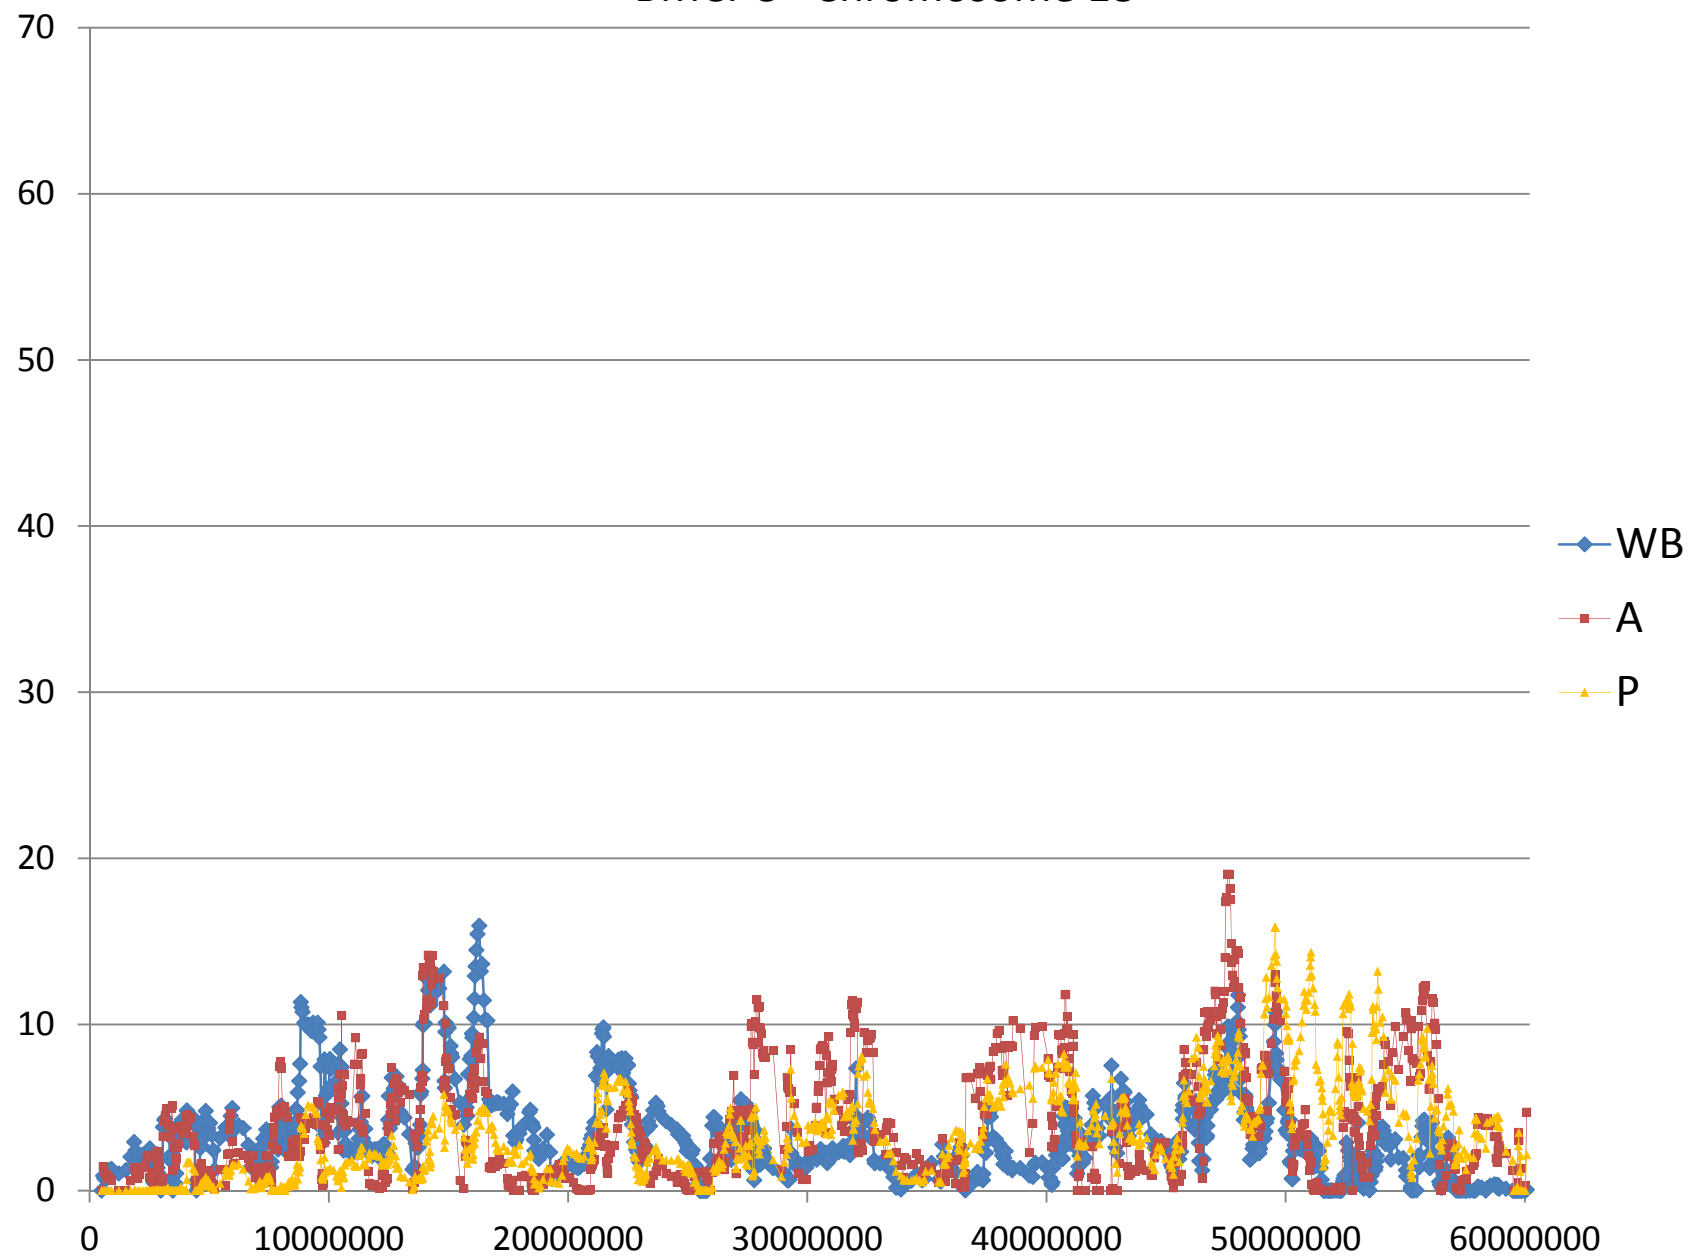

Supplement: Supplementary file 3 [file aab-60-51-2017-supplement.zip]
