# Supplementary material for: Genome-wide QTL mapping results for regional DXA body composition and bone mineral density traits in pigs
Source: Copernicus journal article supplement (doi:10.5194/aab-60-51-2017), 2017-04-05

LeanPC - Chromosome 1

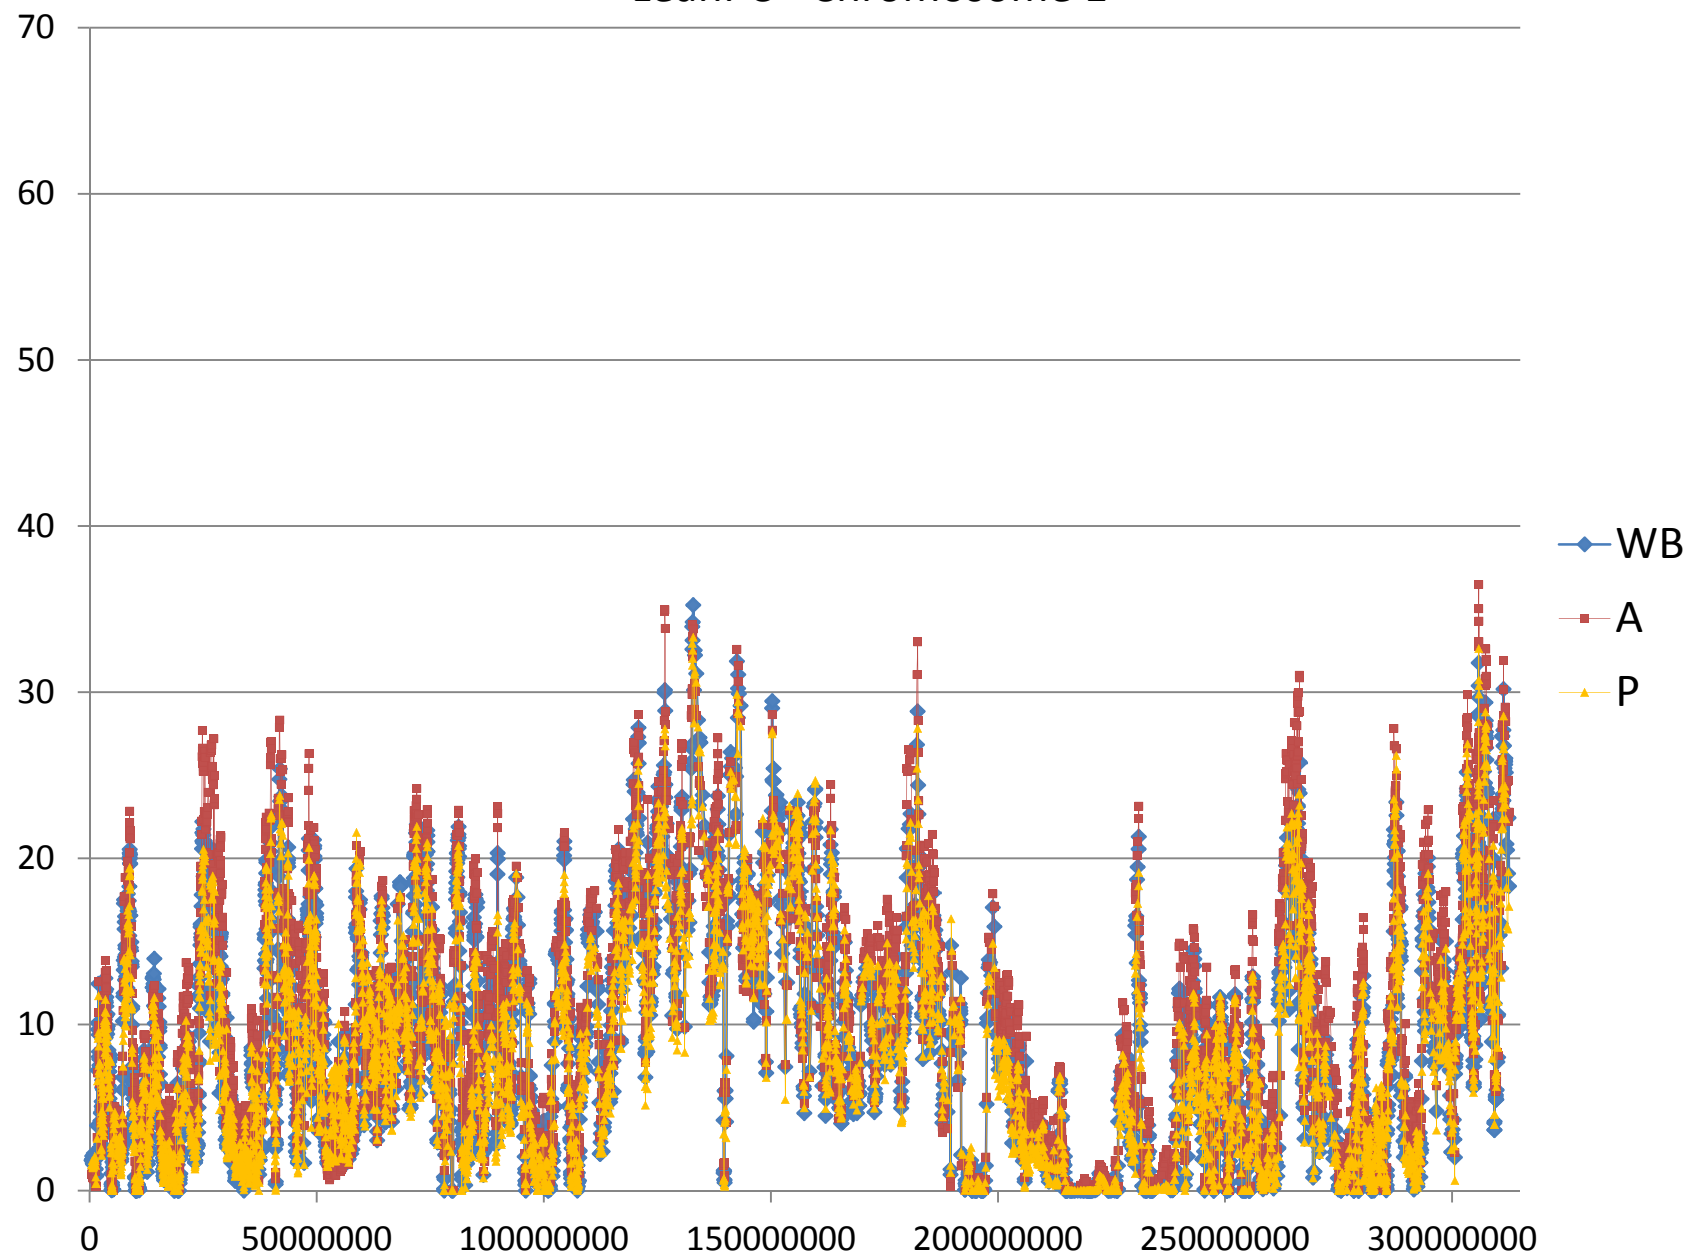

LeanPC - Chromosome 2

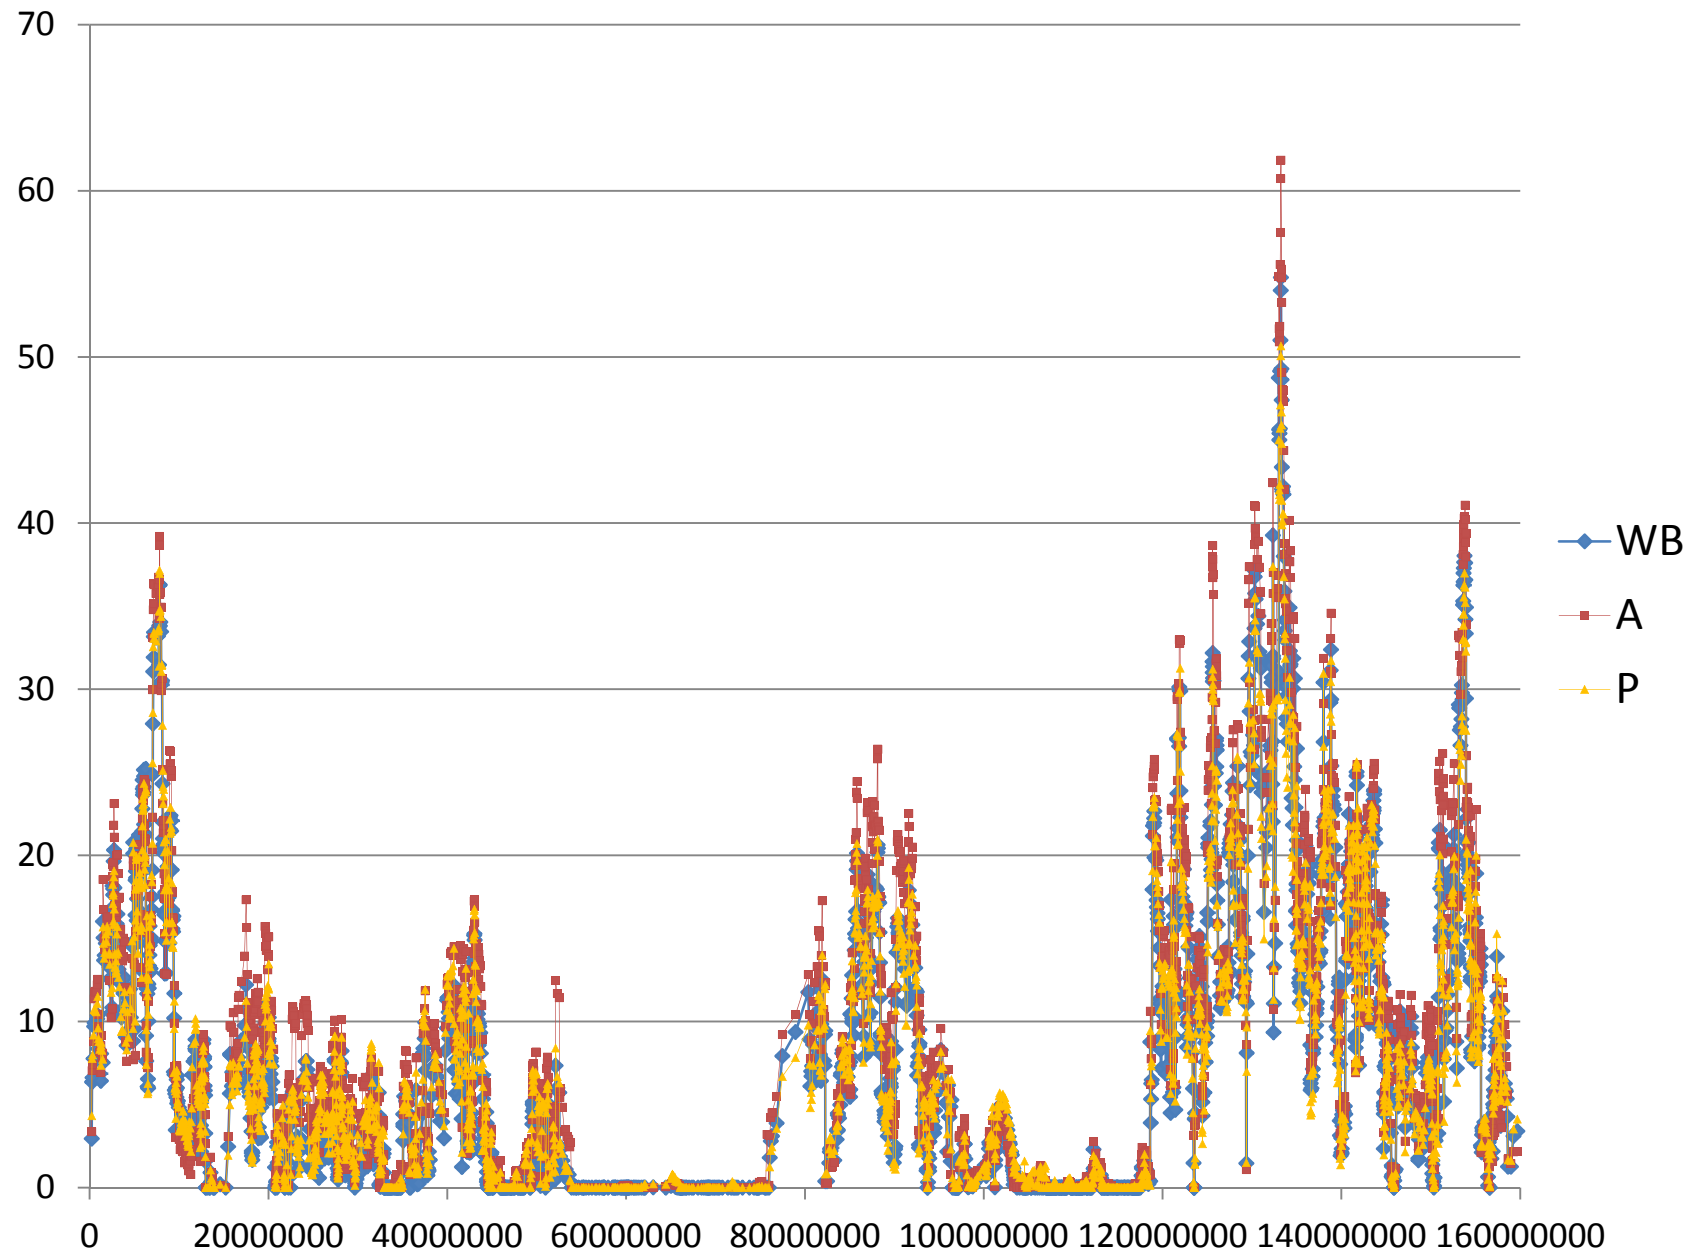

# LeanPC - Chromosome 3

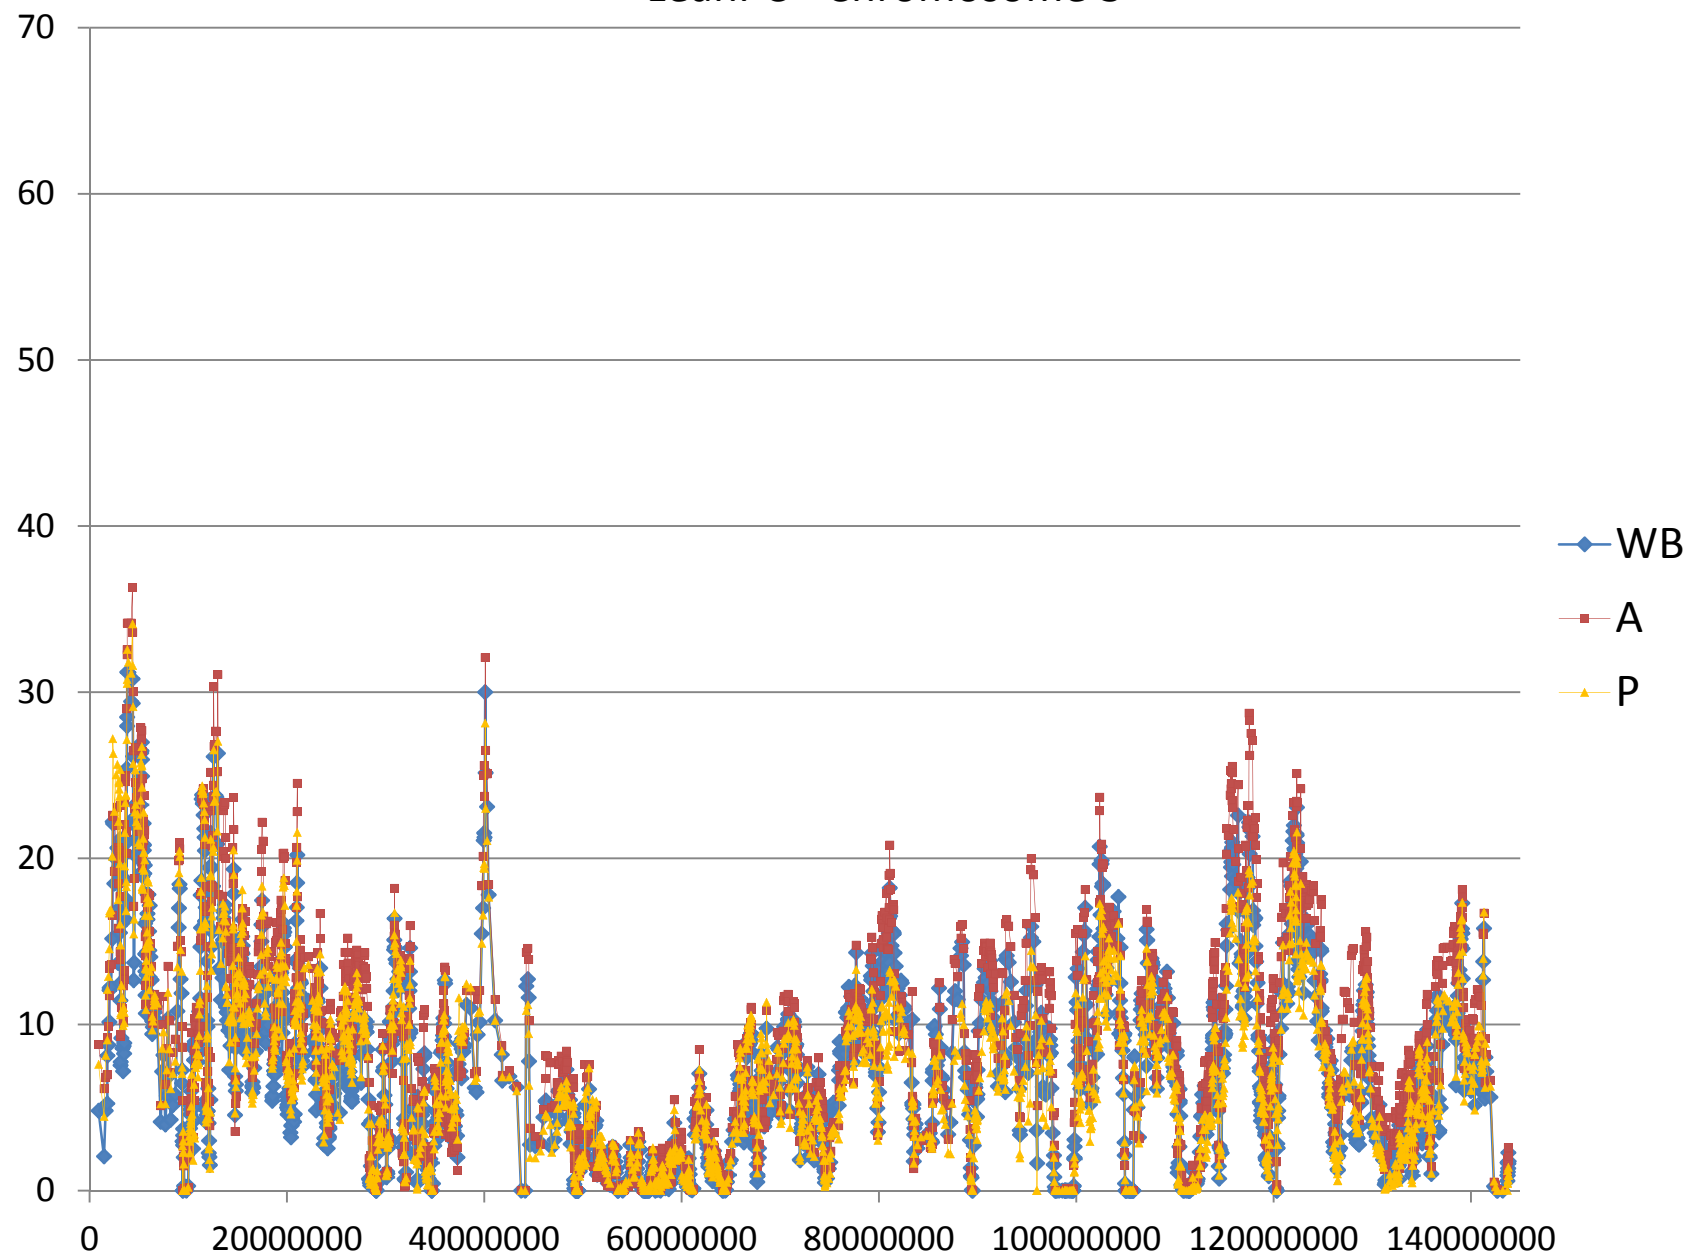

# LeanPC - Chromosome 4

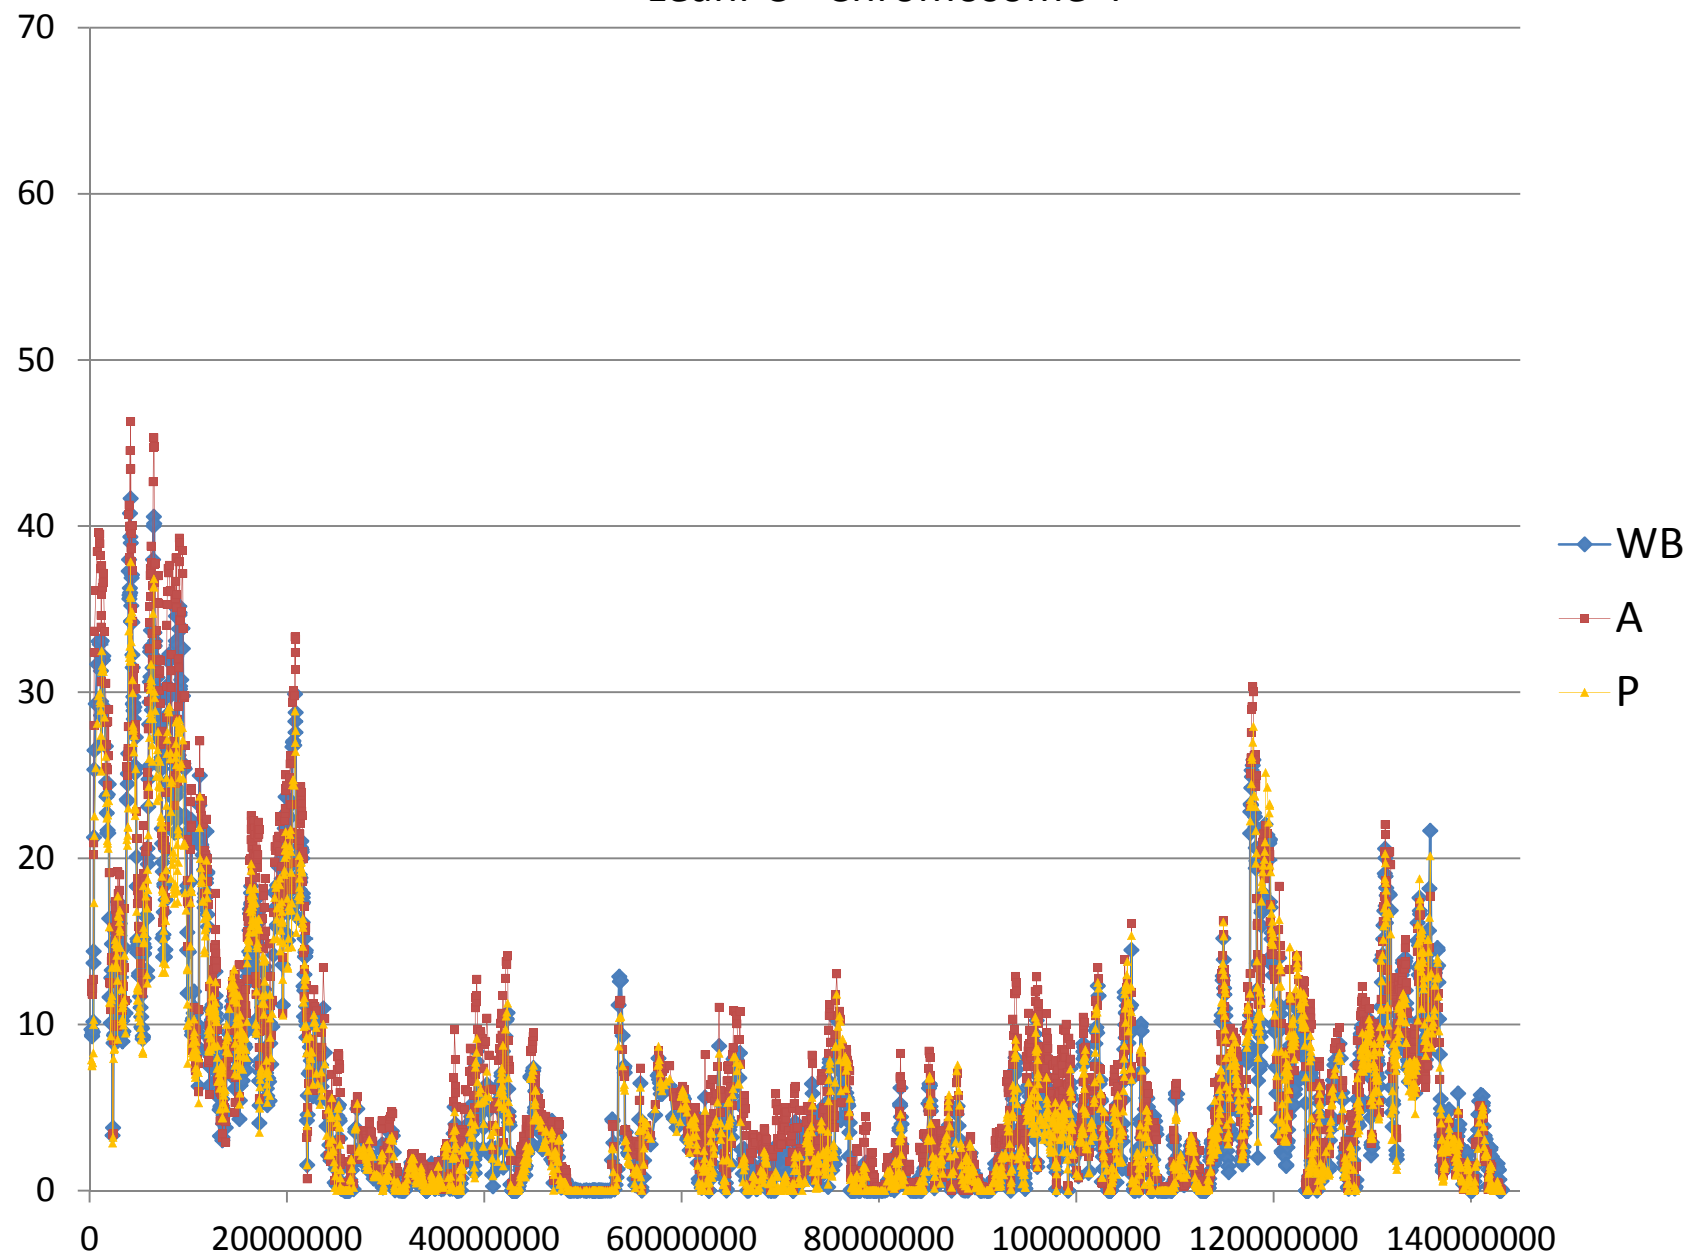

# LeanPC - Chromosome 5

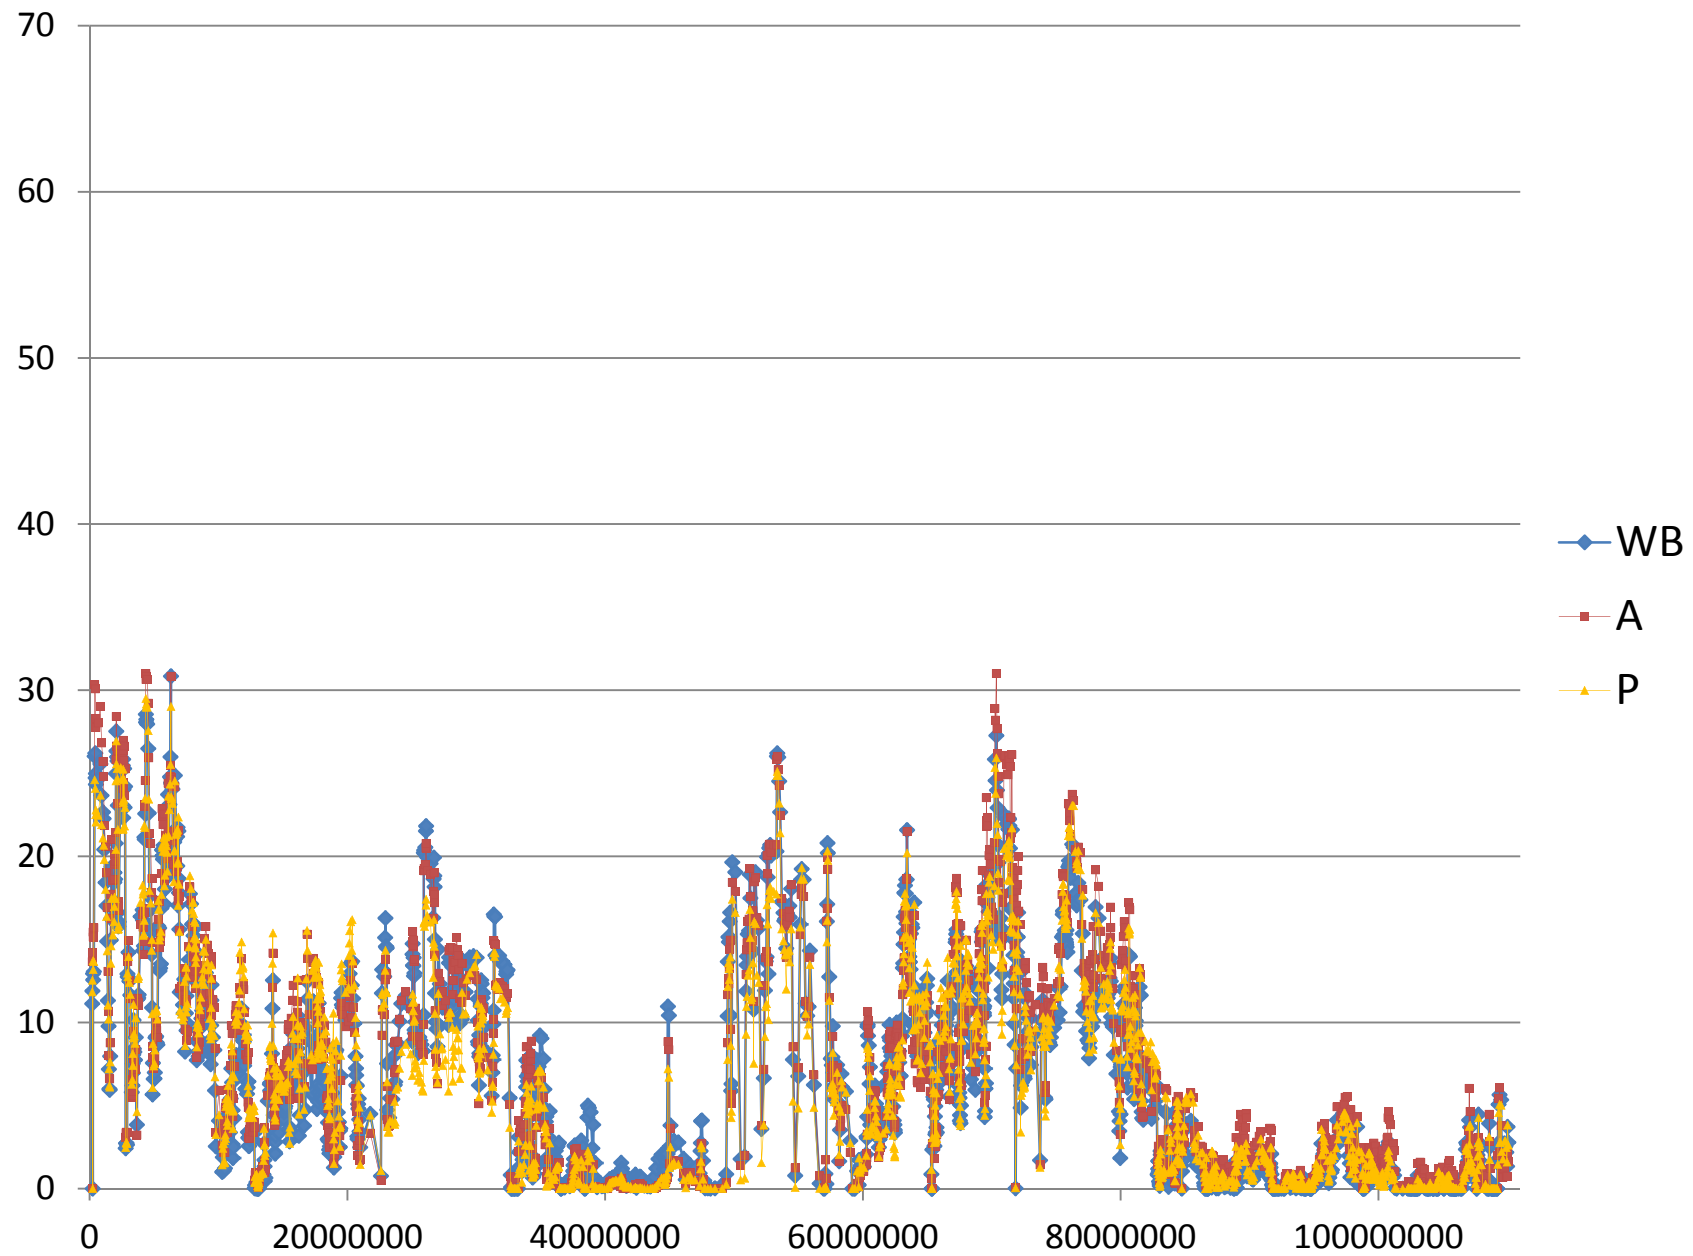

LeanPC - Chromosome 6

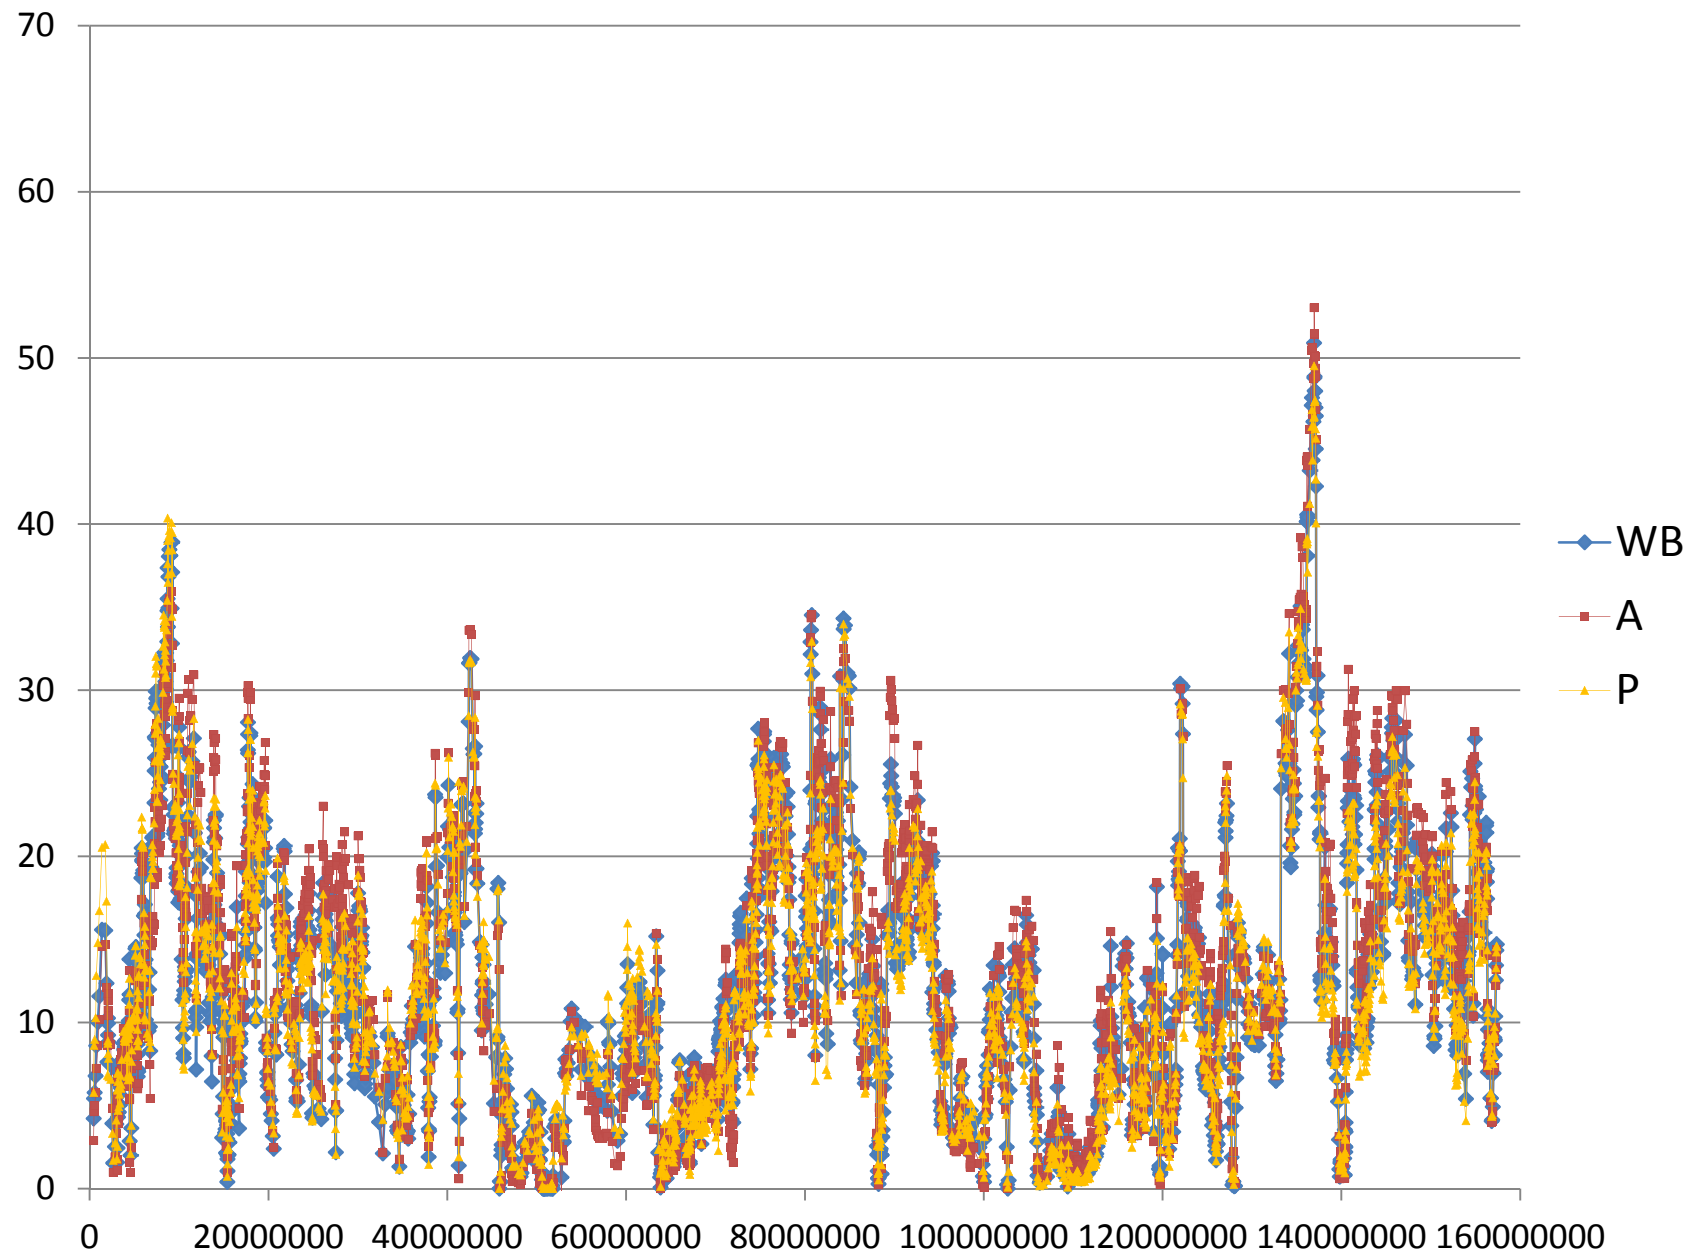

BMCPC - Chromosome 7

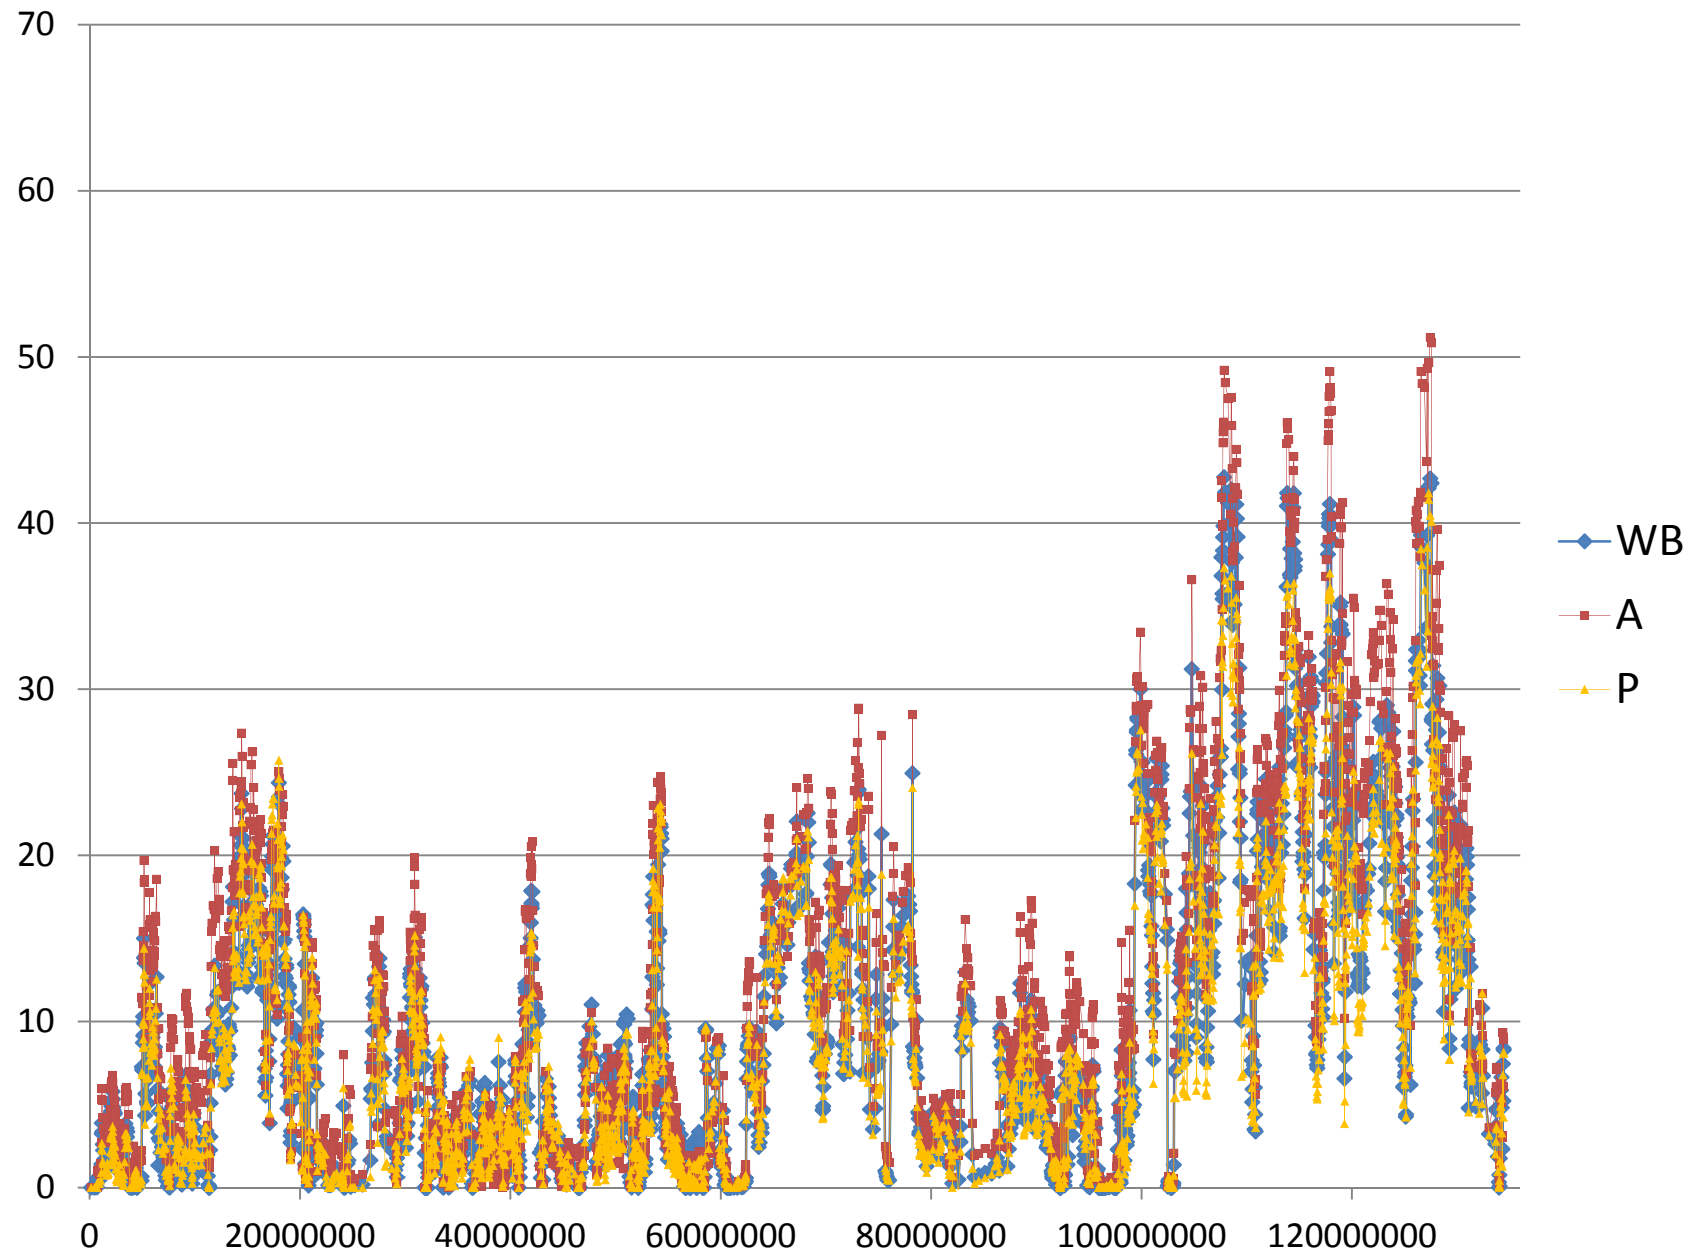

# LeanPC - Chromosome 8

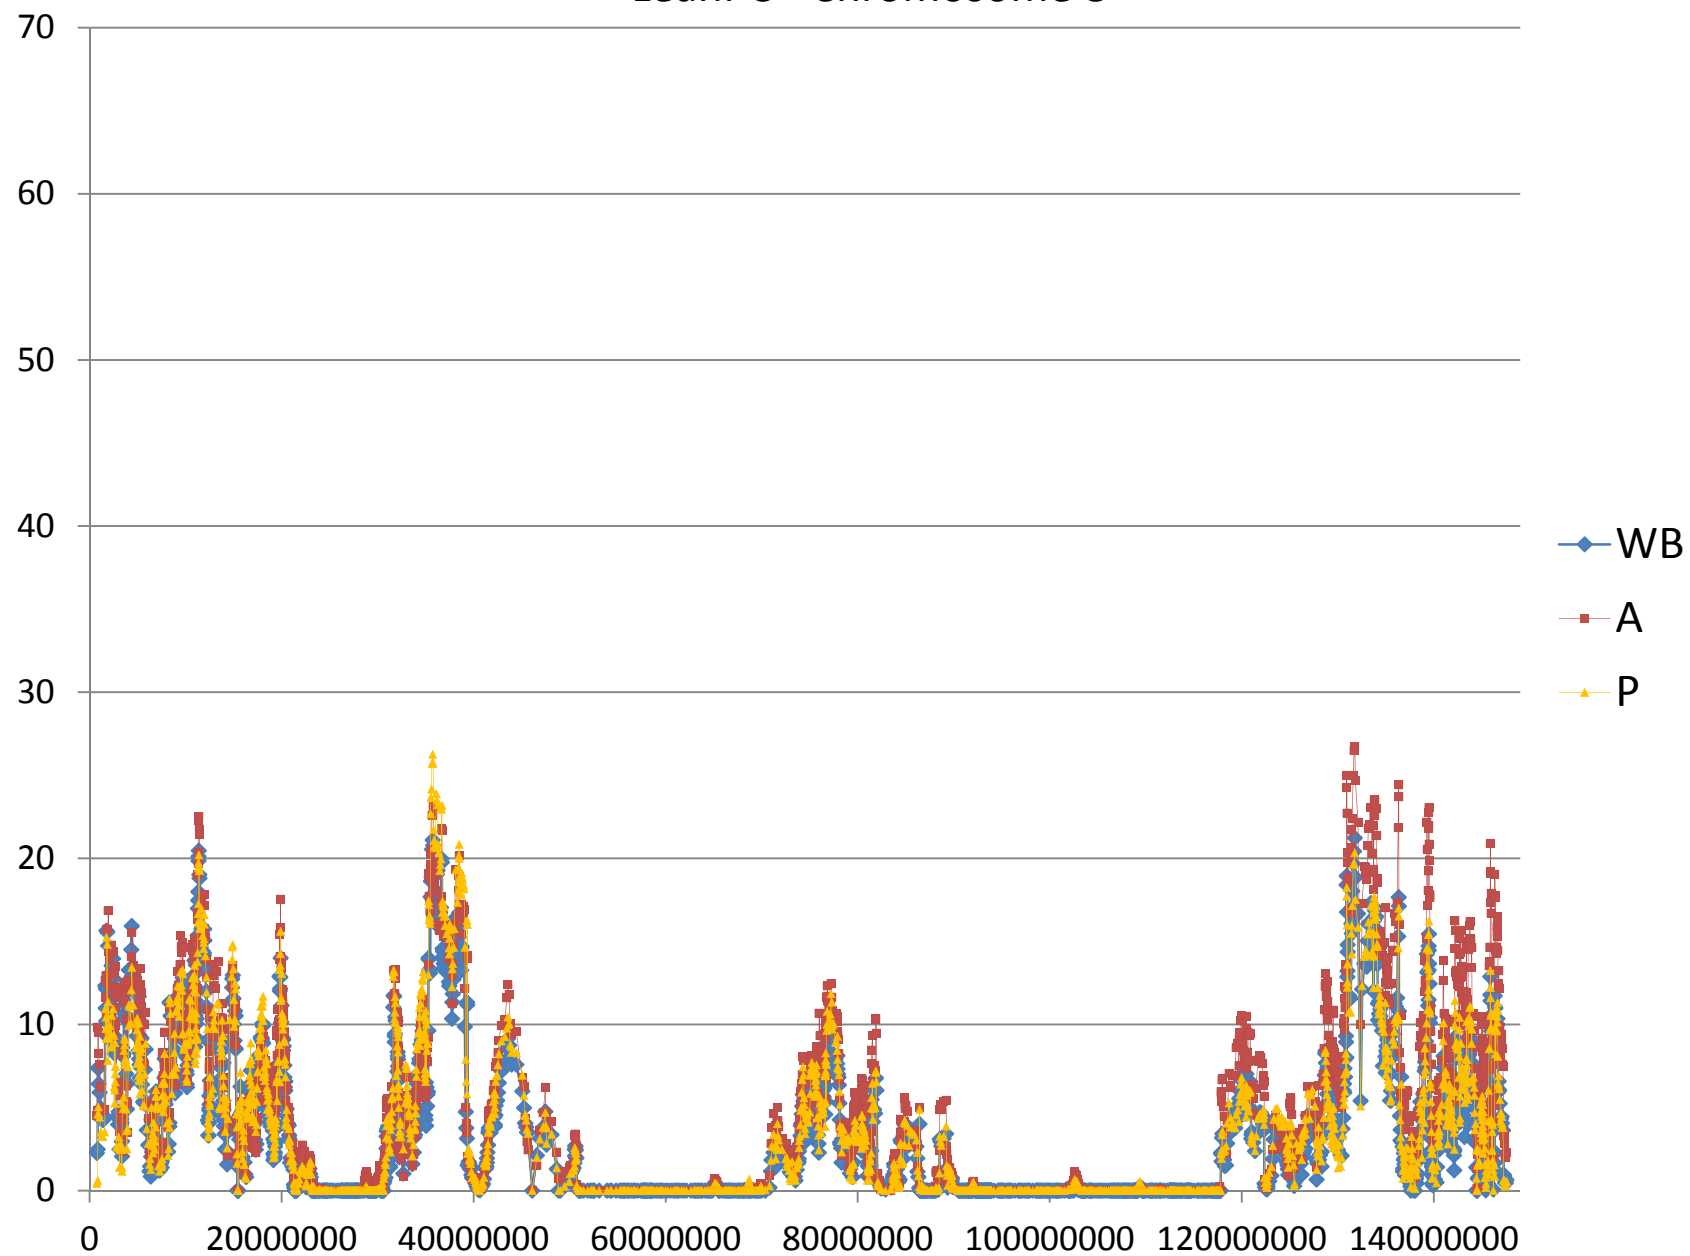



LeanPC - Chromosome 9

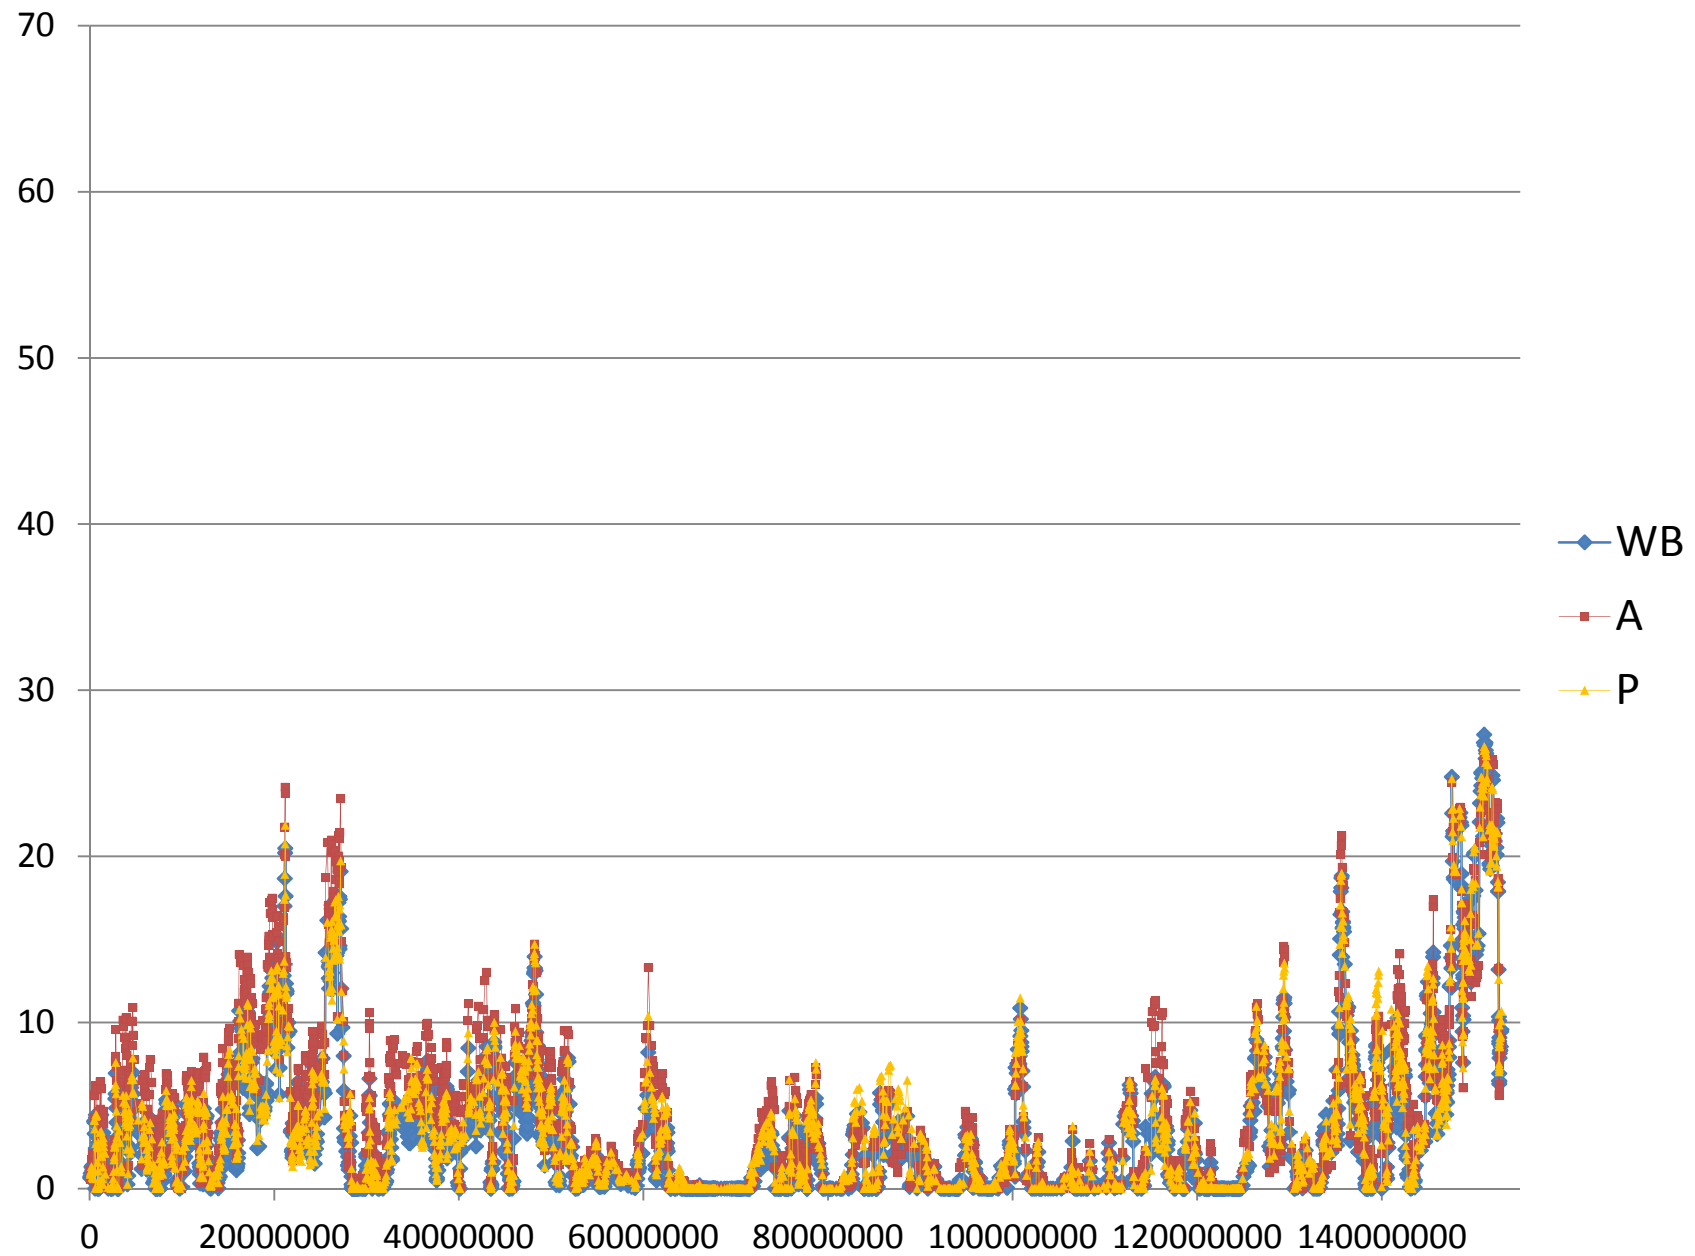

LeanPC - Chromosome 10

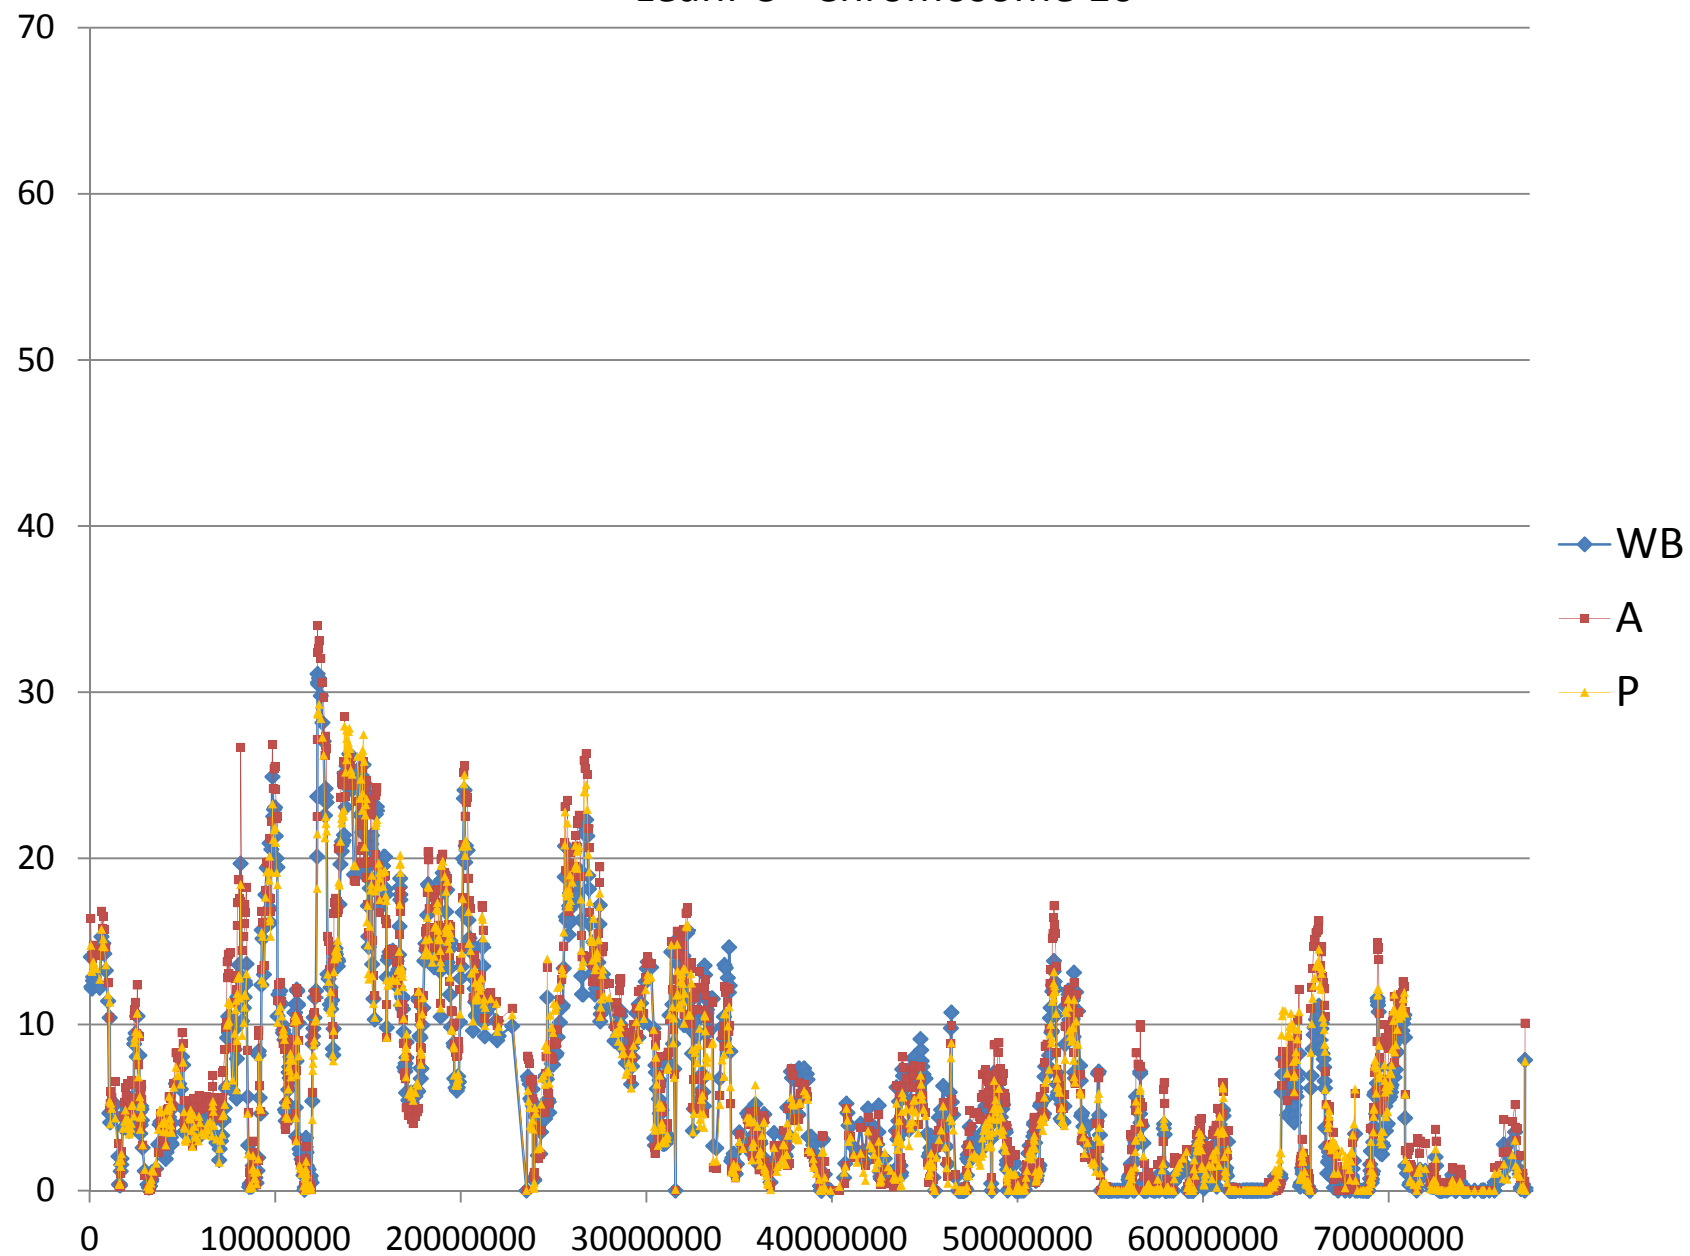

LeanPC - Chromosome 11

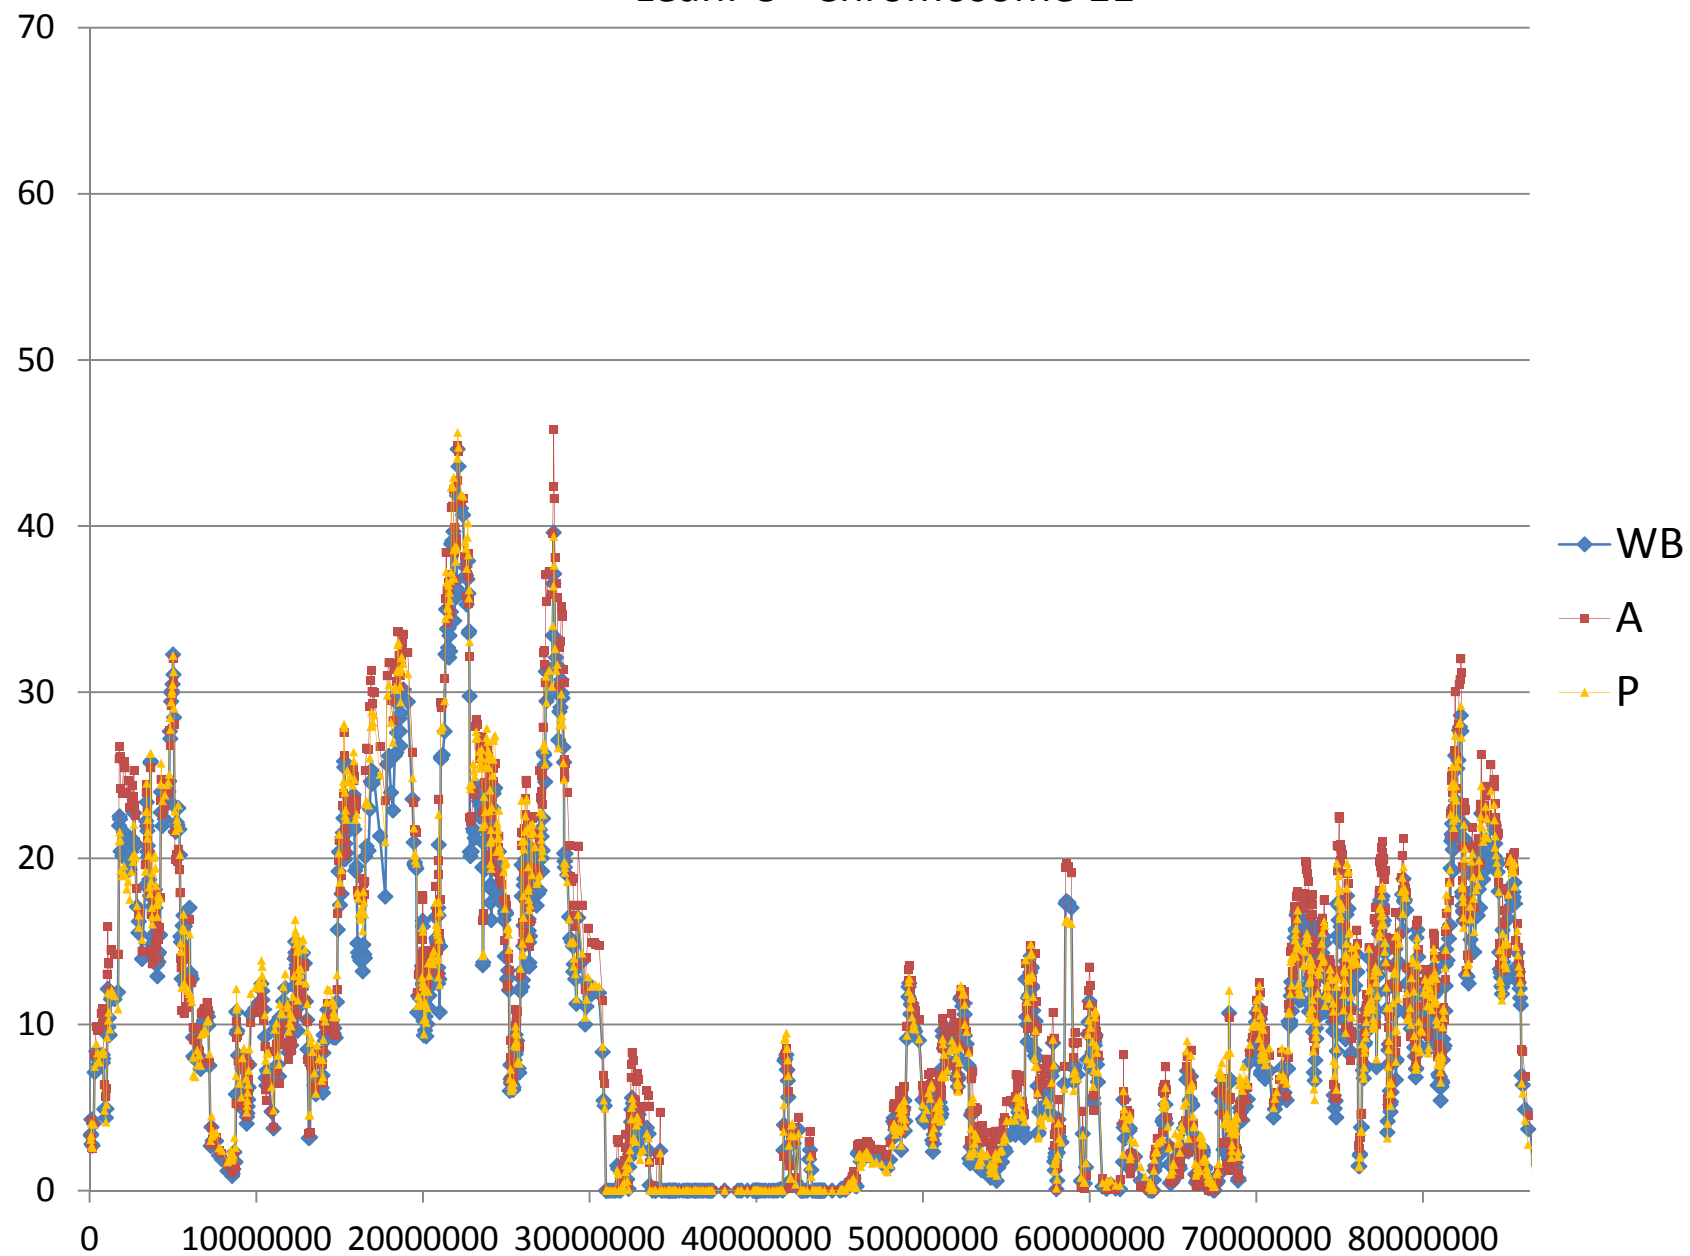

# LeanPC - Chromosome 12

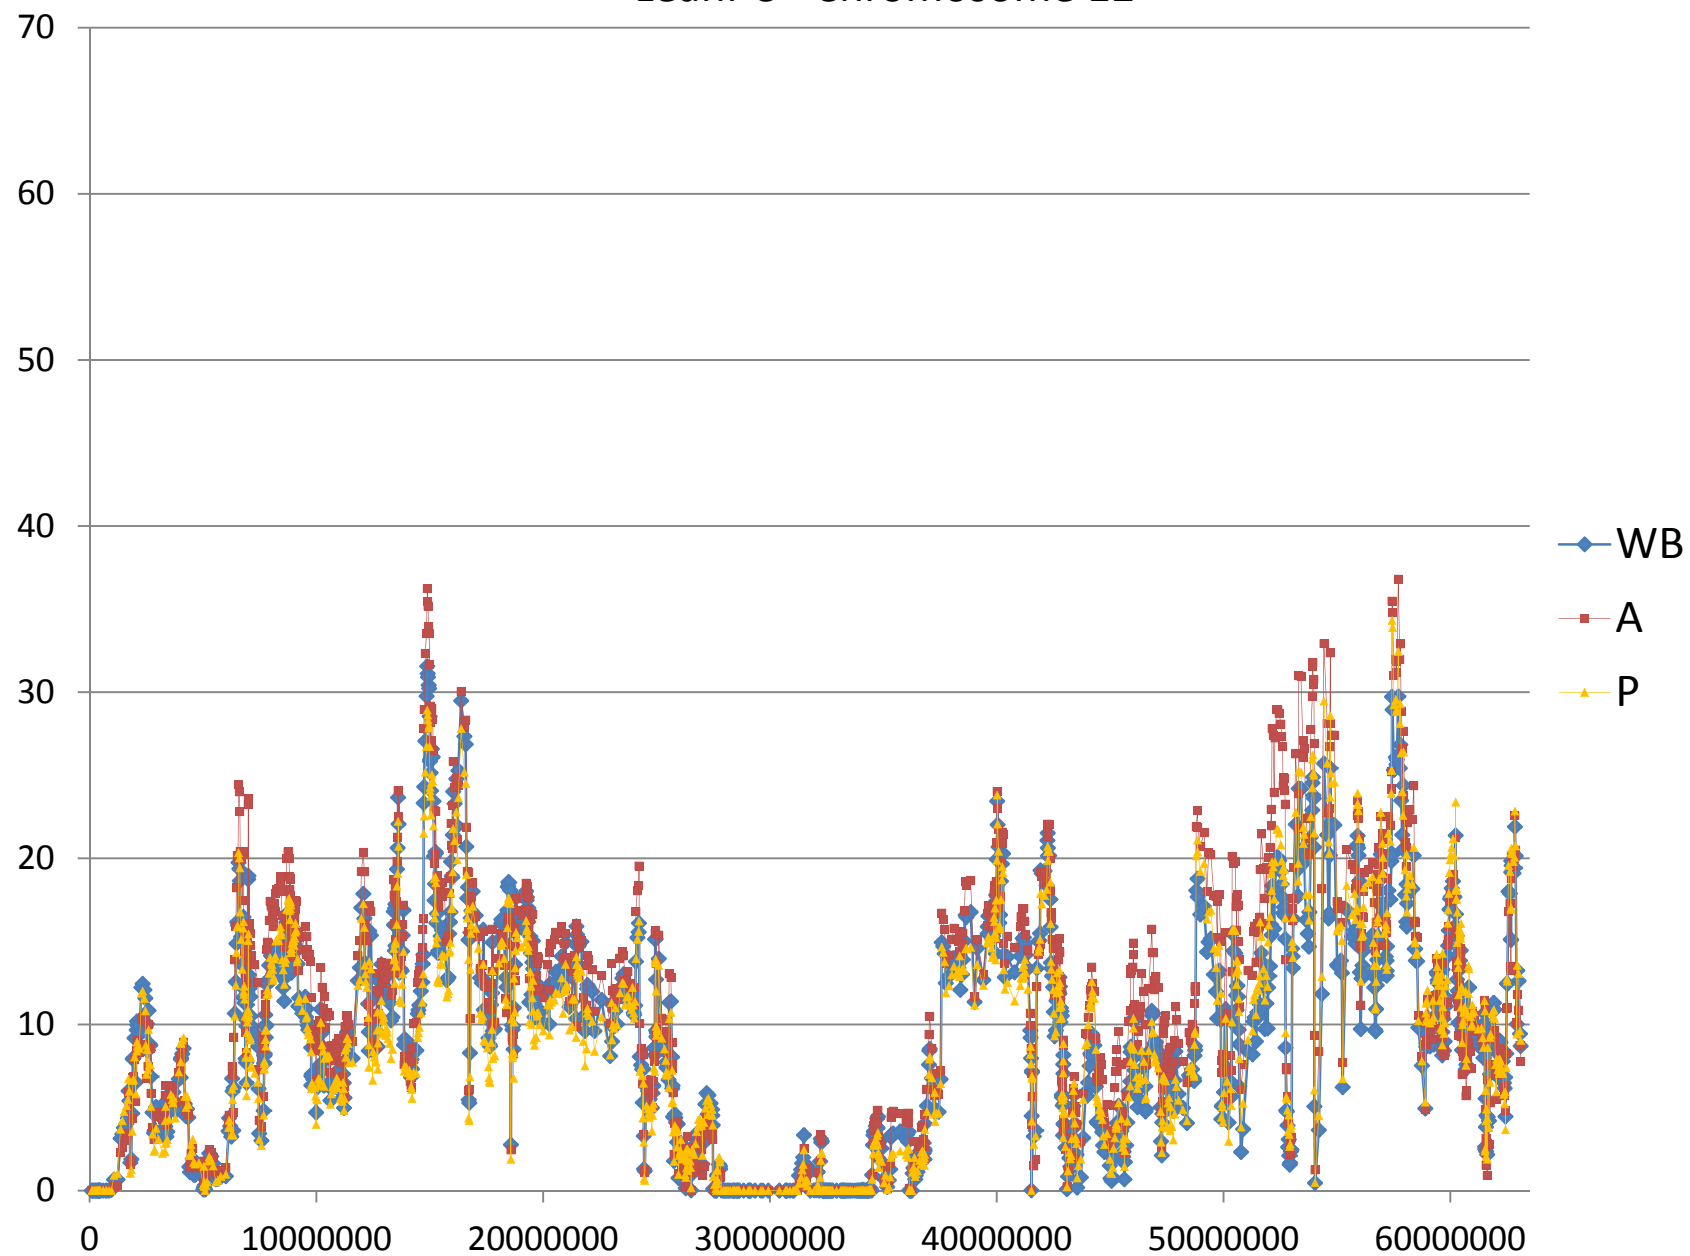

LeanPC - Chromosome 13

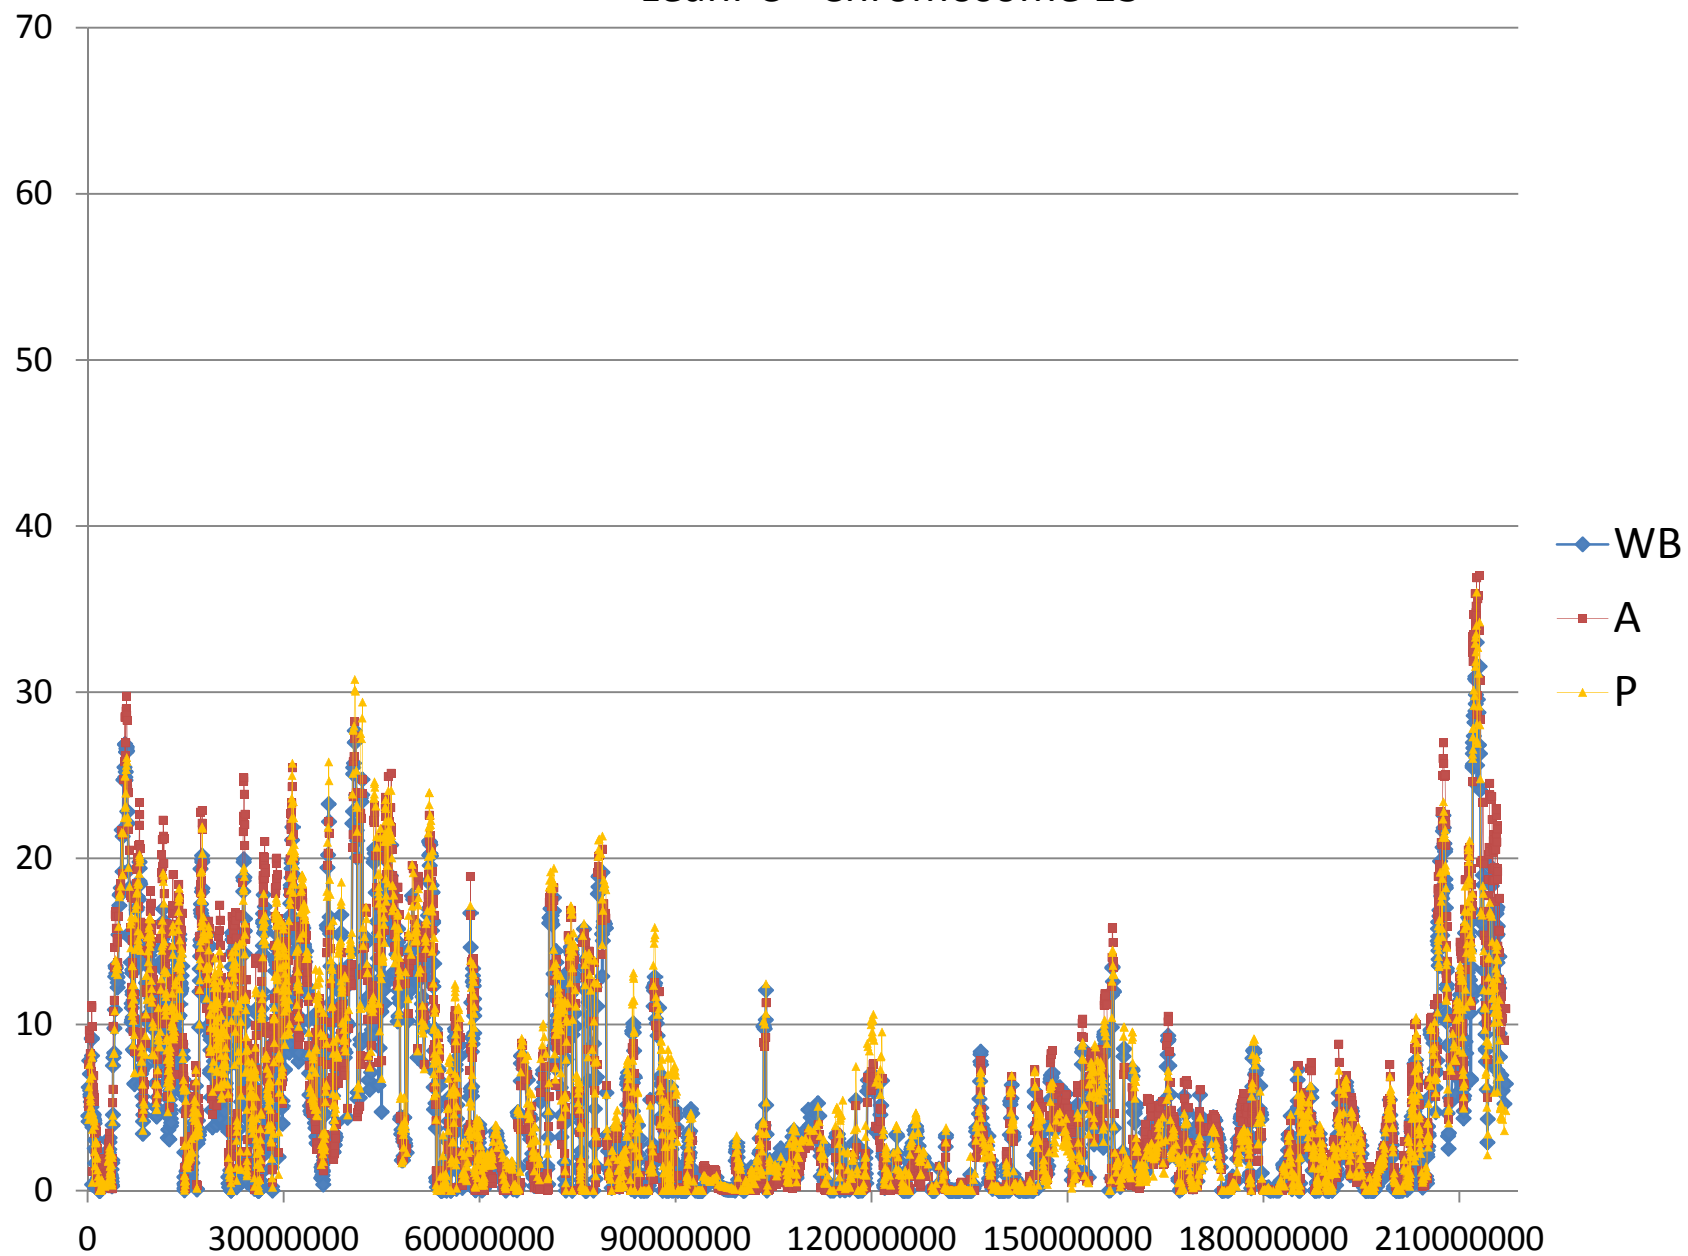

LeanPC - Chromosome 14

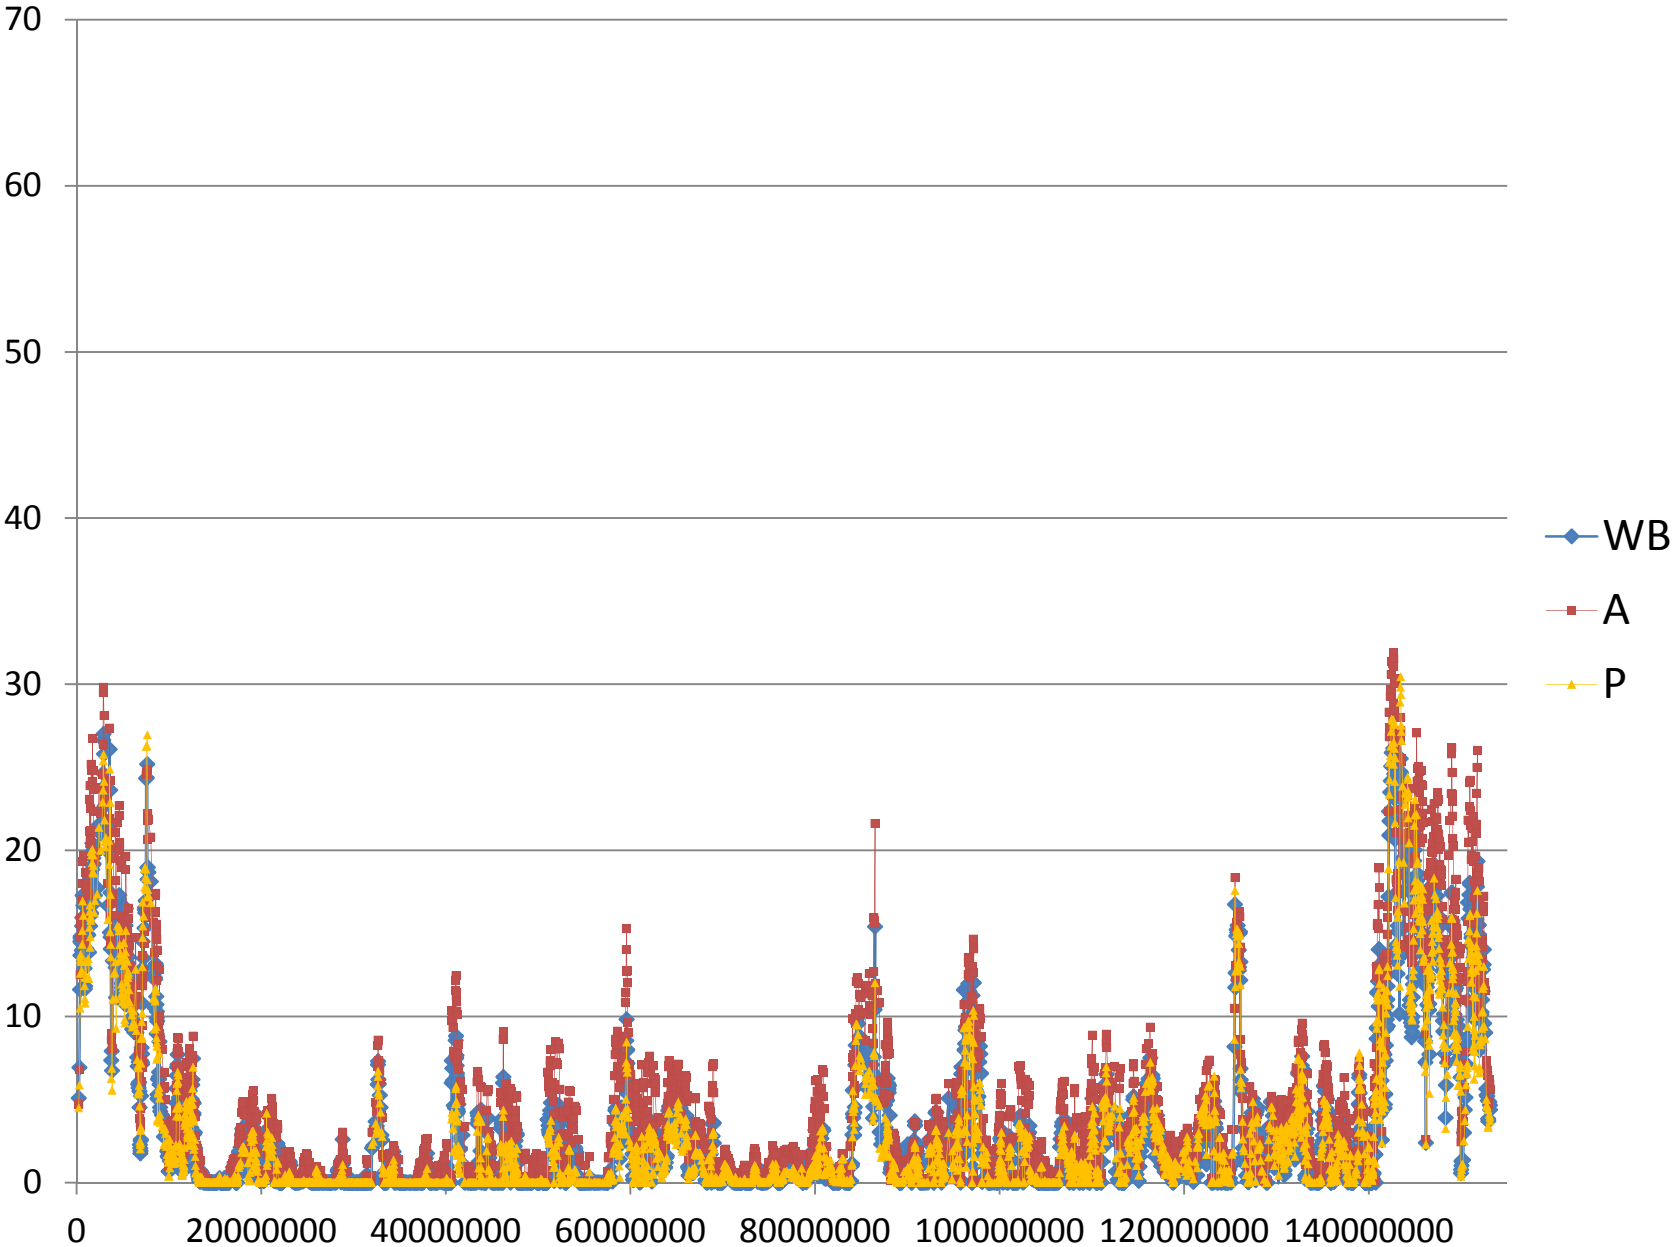

# LeanPC - Chromosome 15

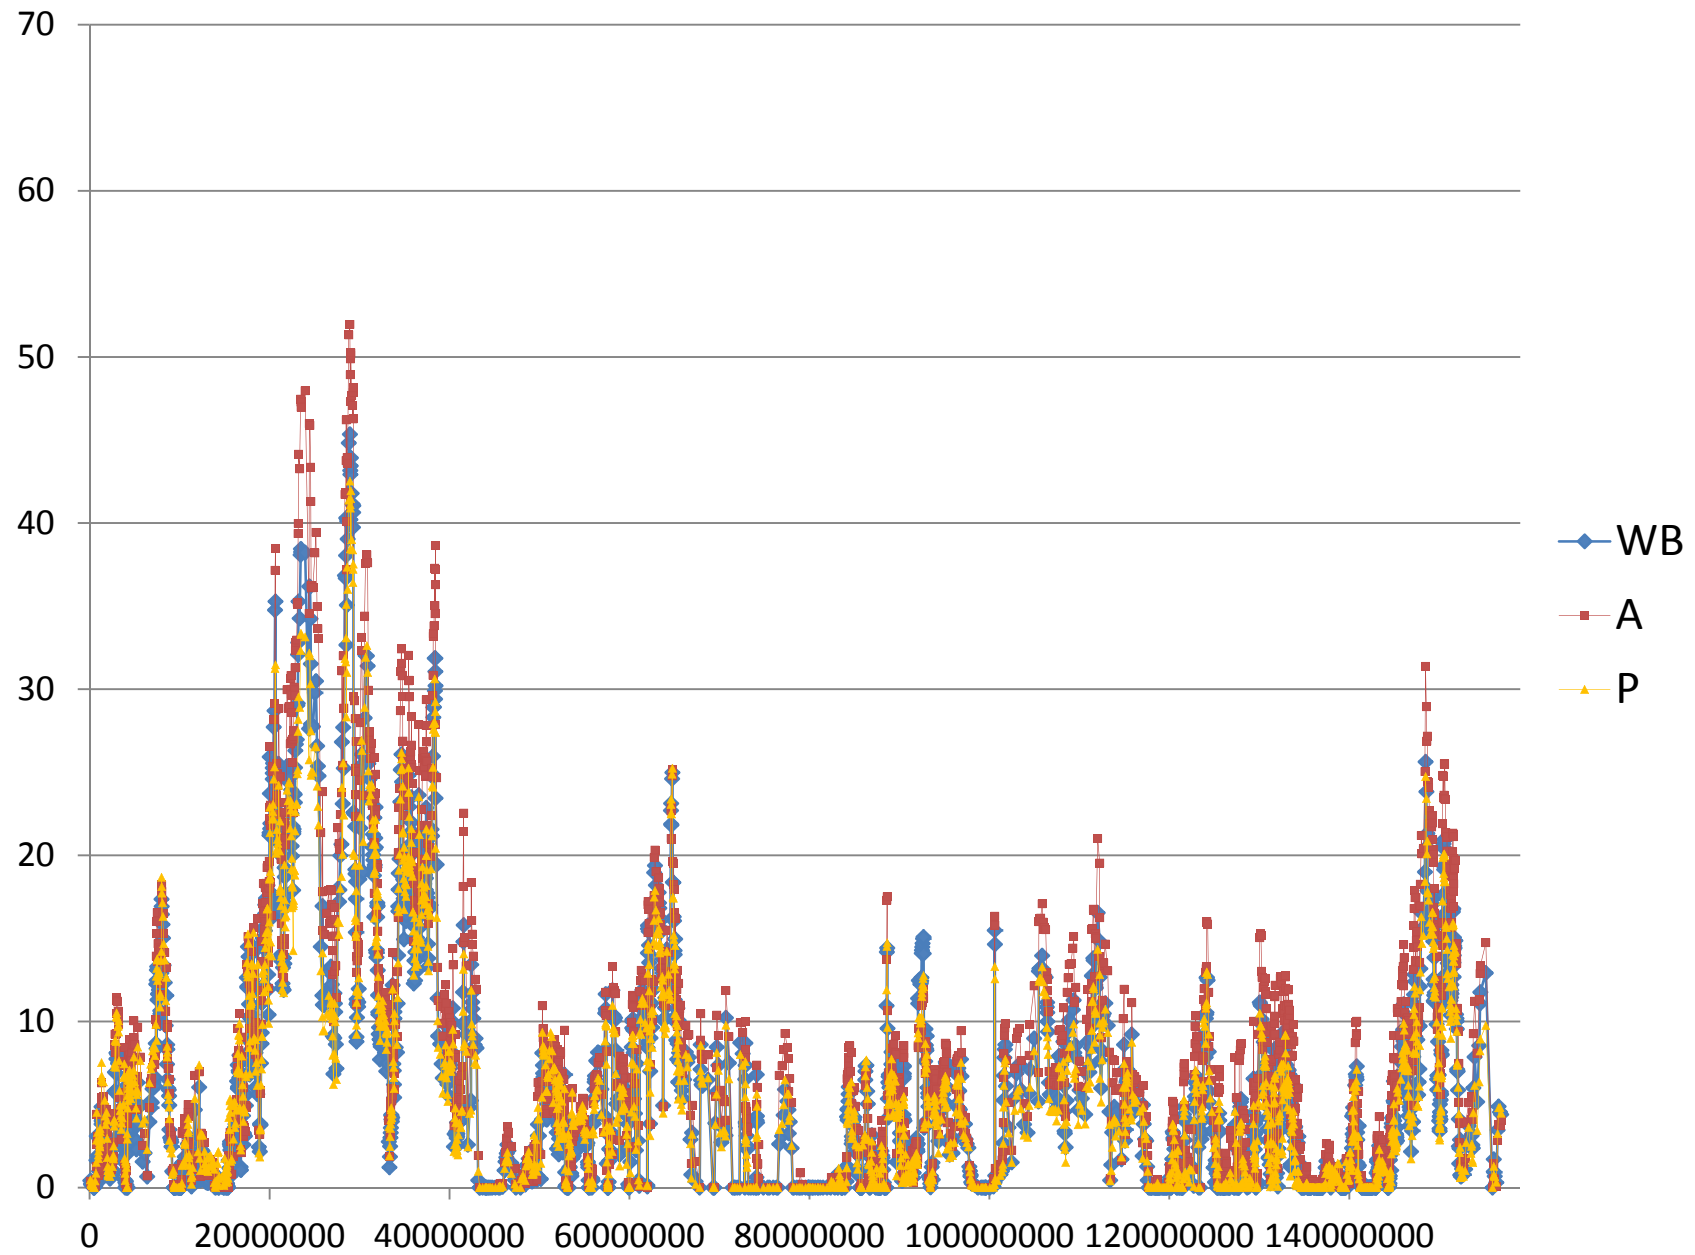

LeanPC - Chromosome 16

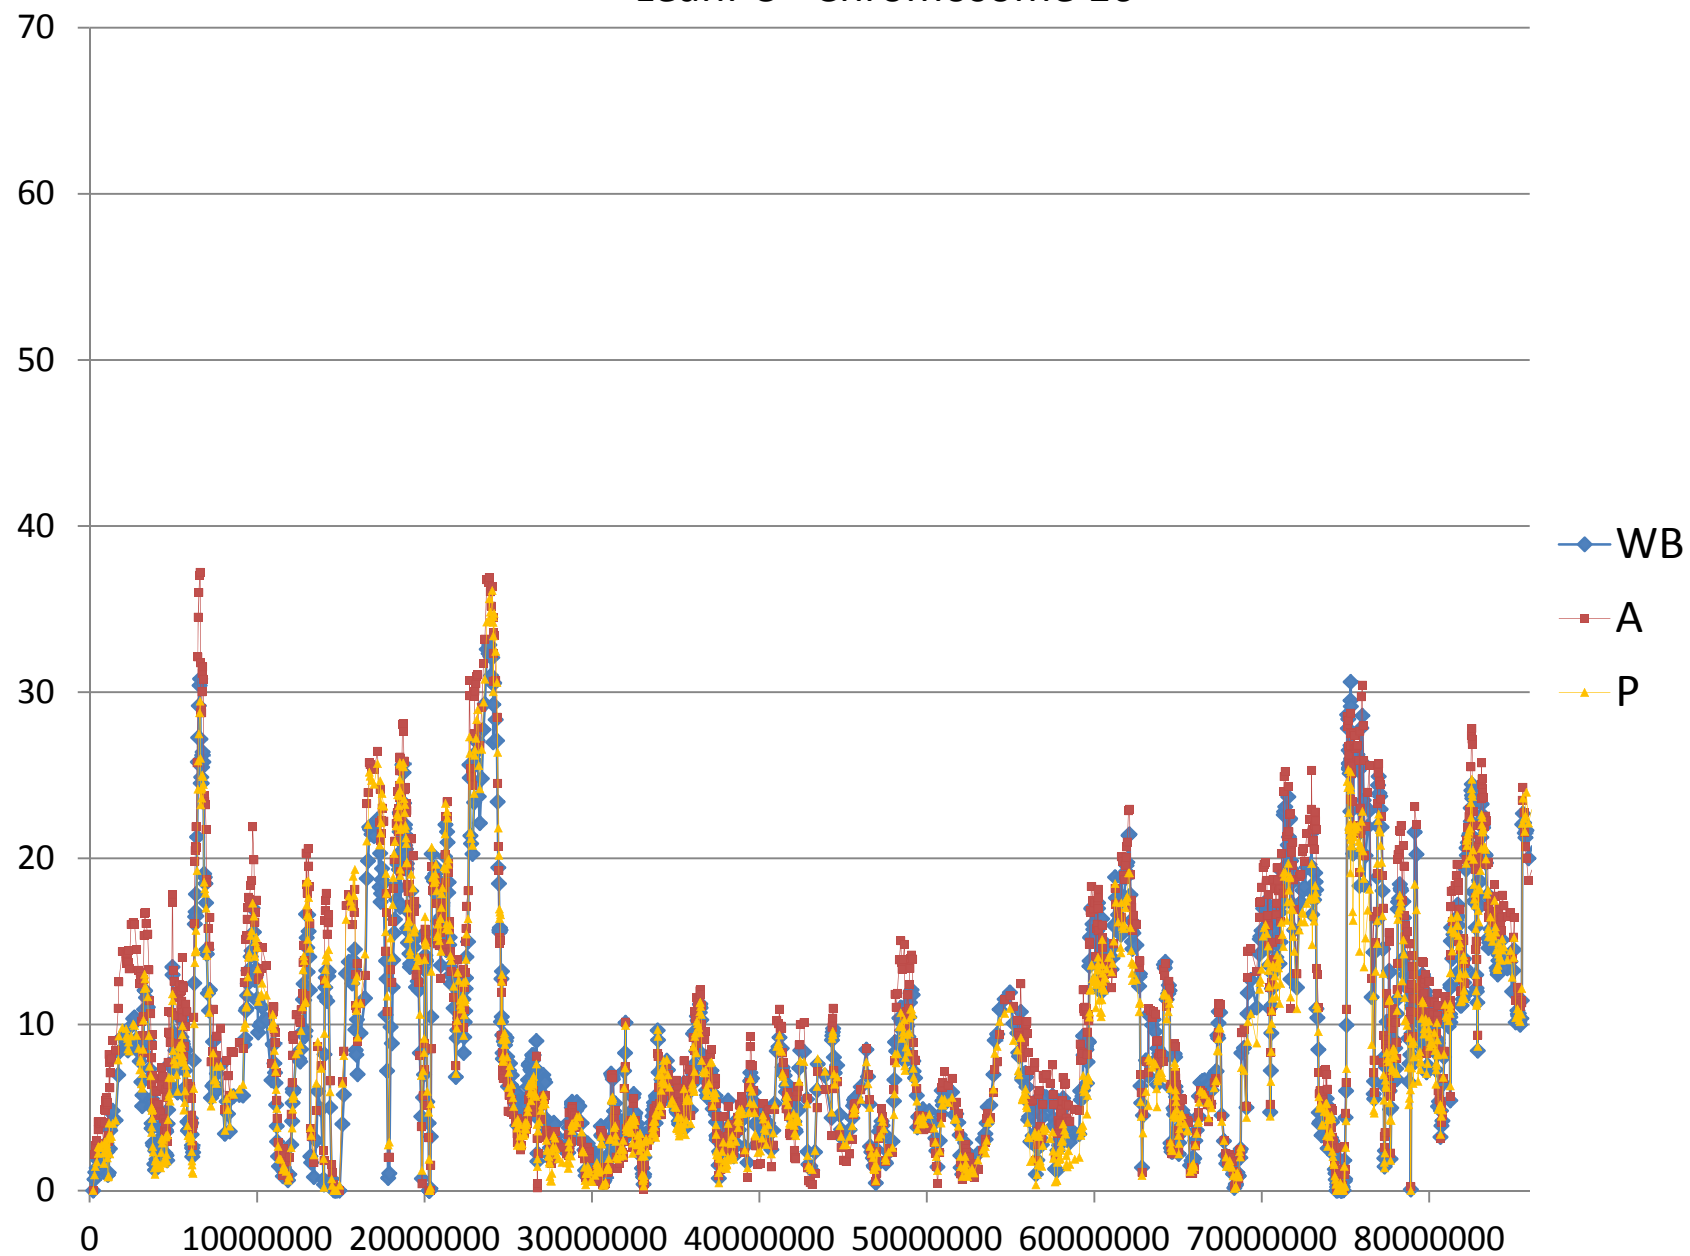



LeanPC - Chromosome 17

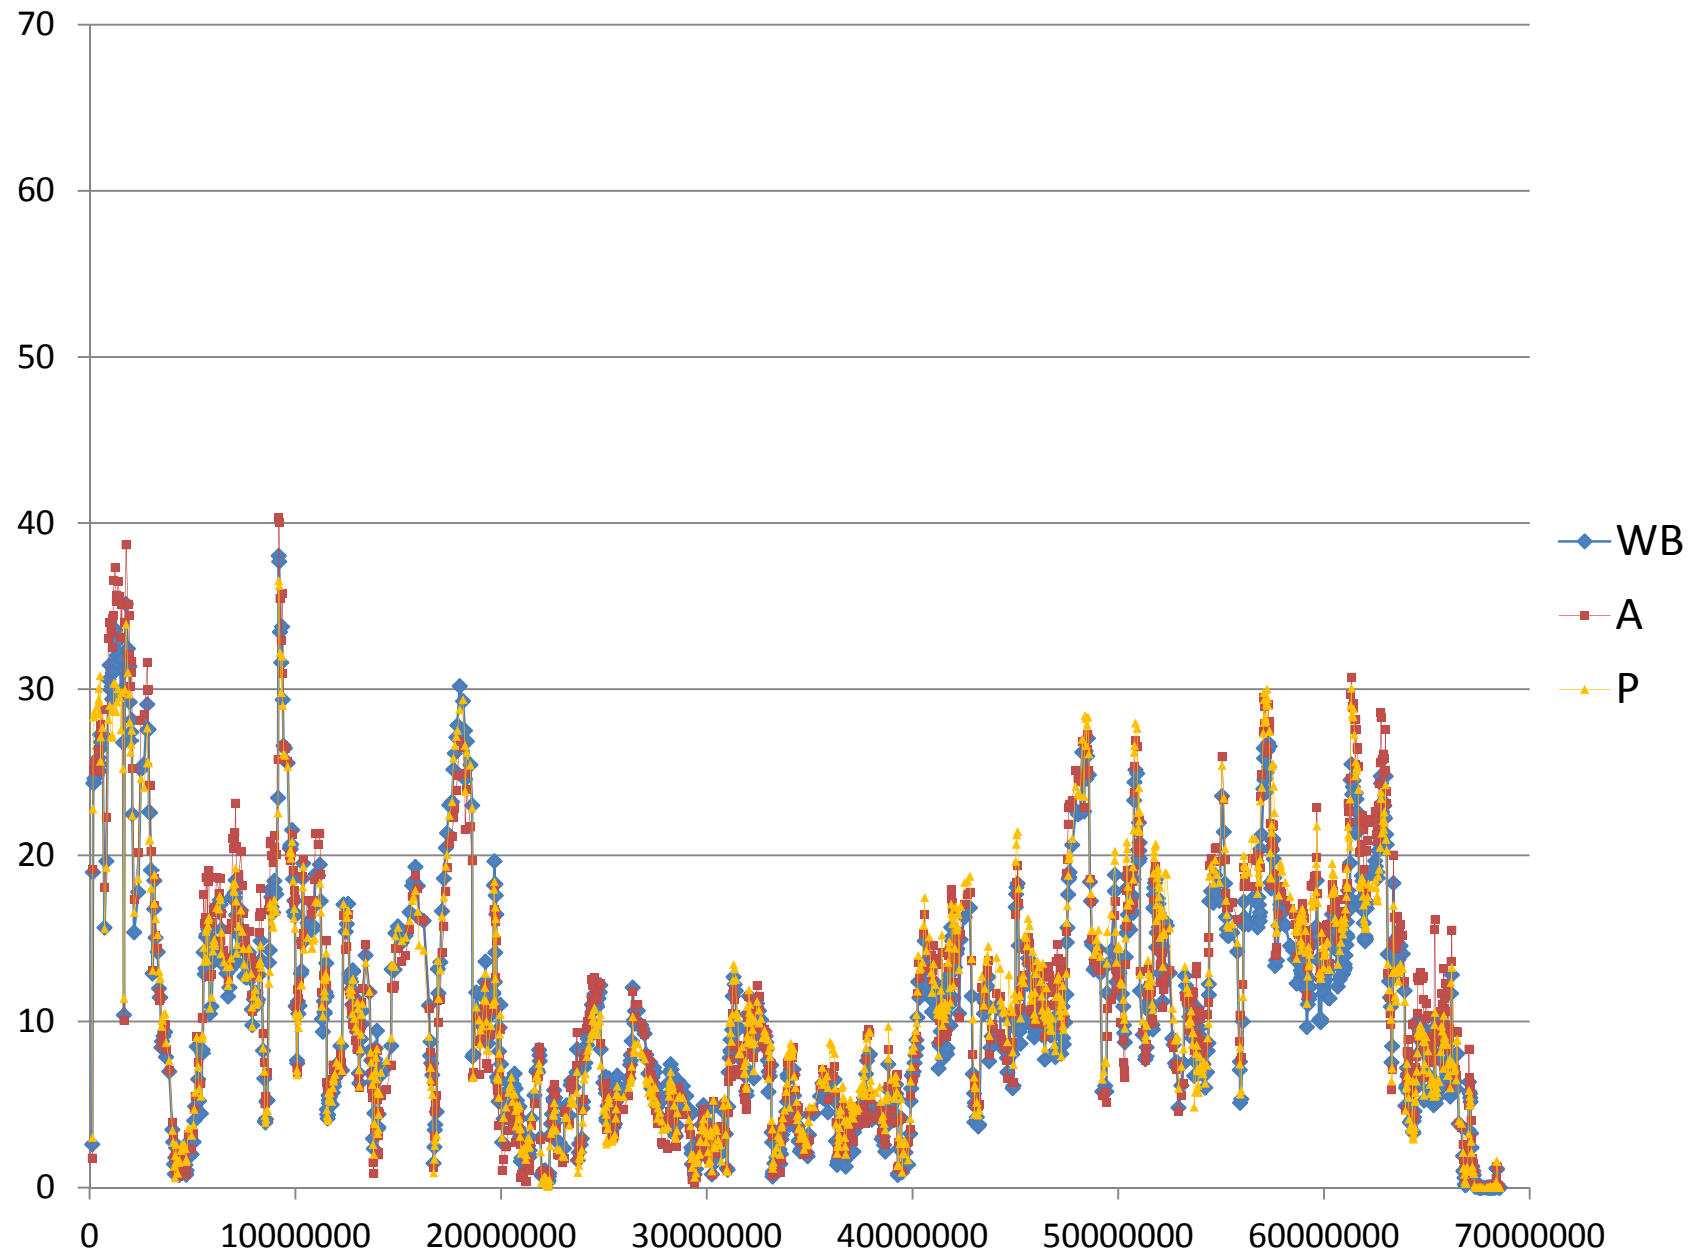

# LeanPC - Chromosome 18

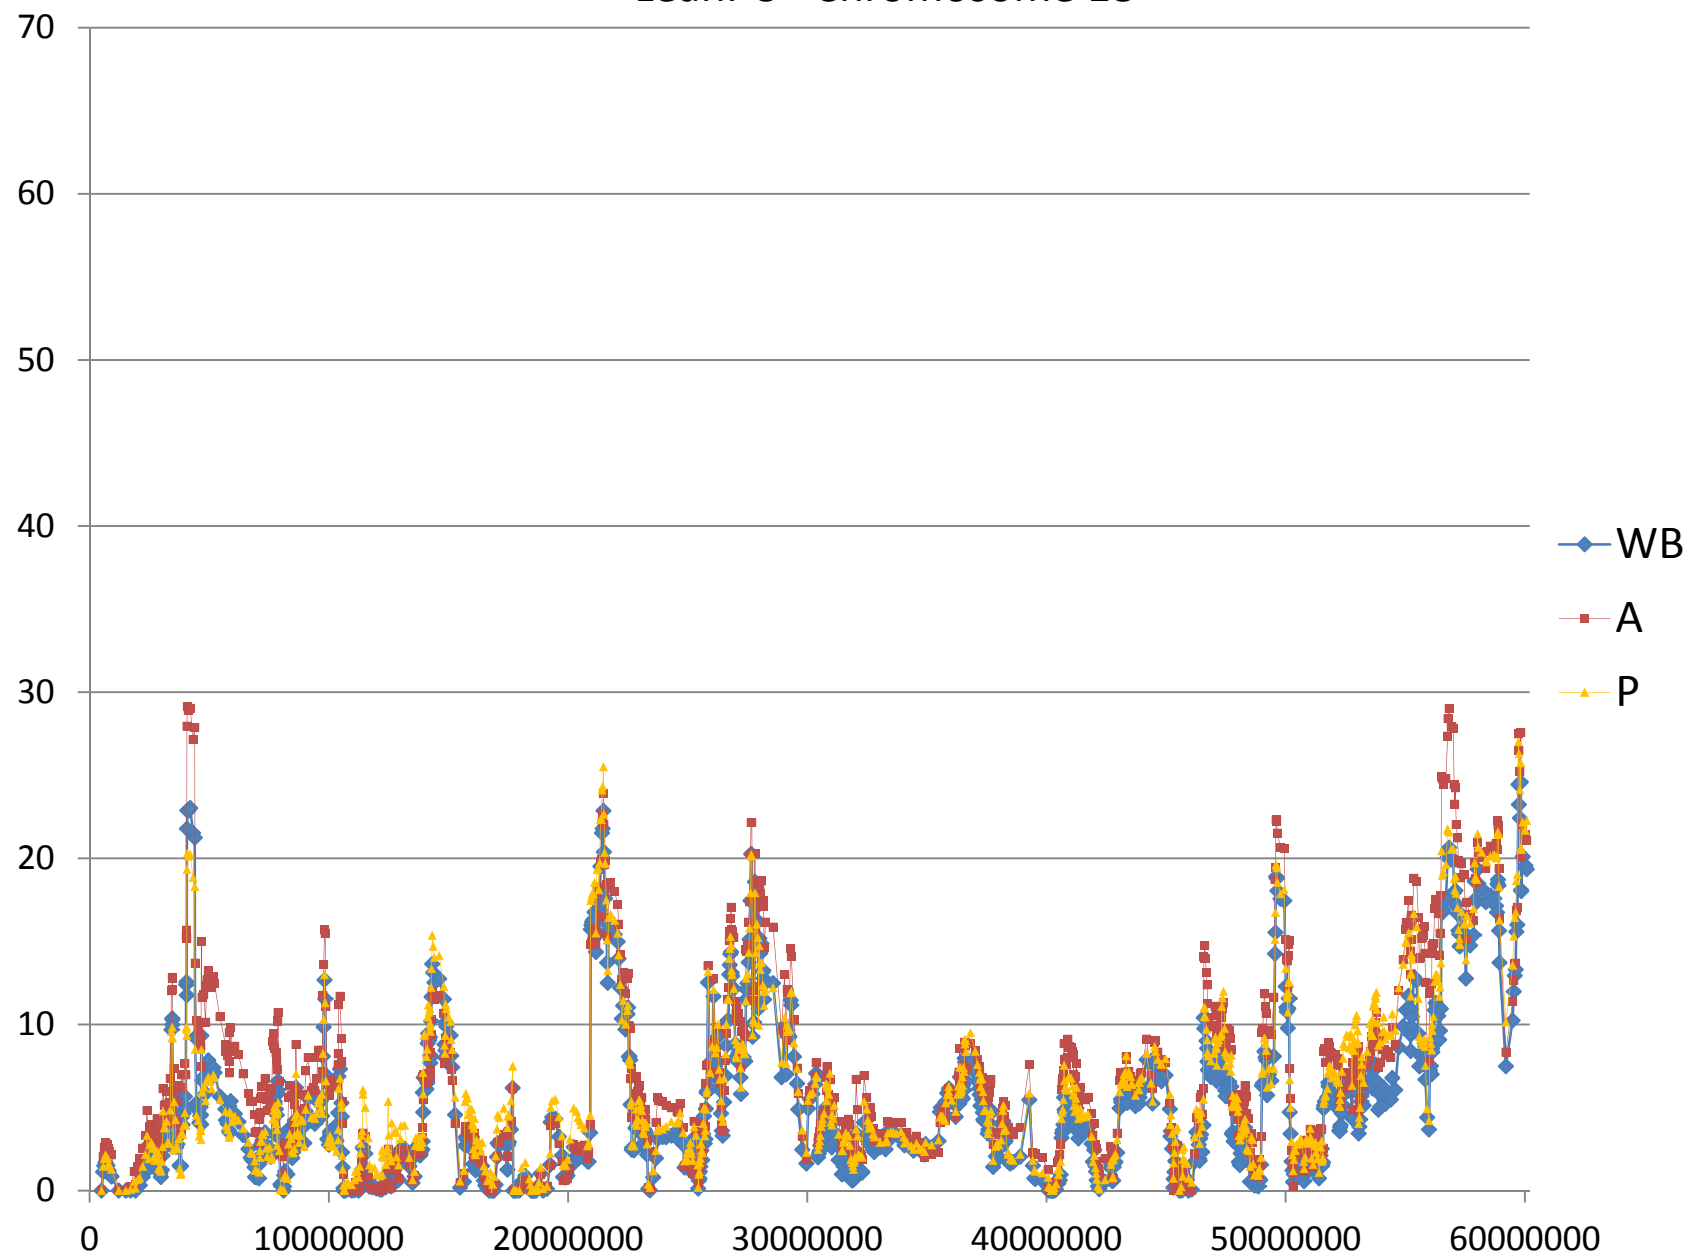

Supplement: Supplementary file 4 [file aab-60-51-2017-supplement.zip]
