# Supplementary material for: Genome-wide QTL mapping results for regional DXA body composition and bone mineral density traits in pigs
Source: Copernicus journal article supplement (doi:10.5194/aab-60-51-2017), 2017-04-05

FatPC - Chromosome 1

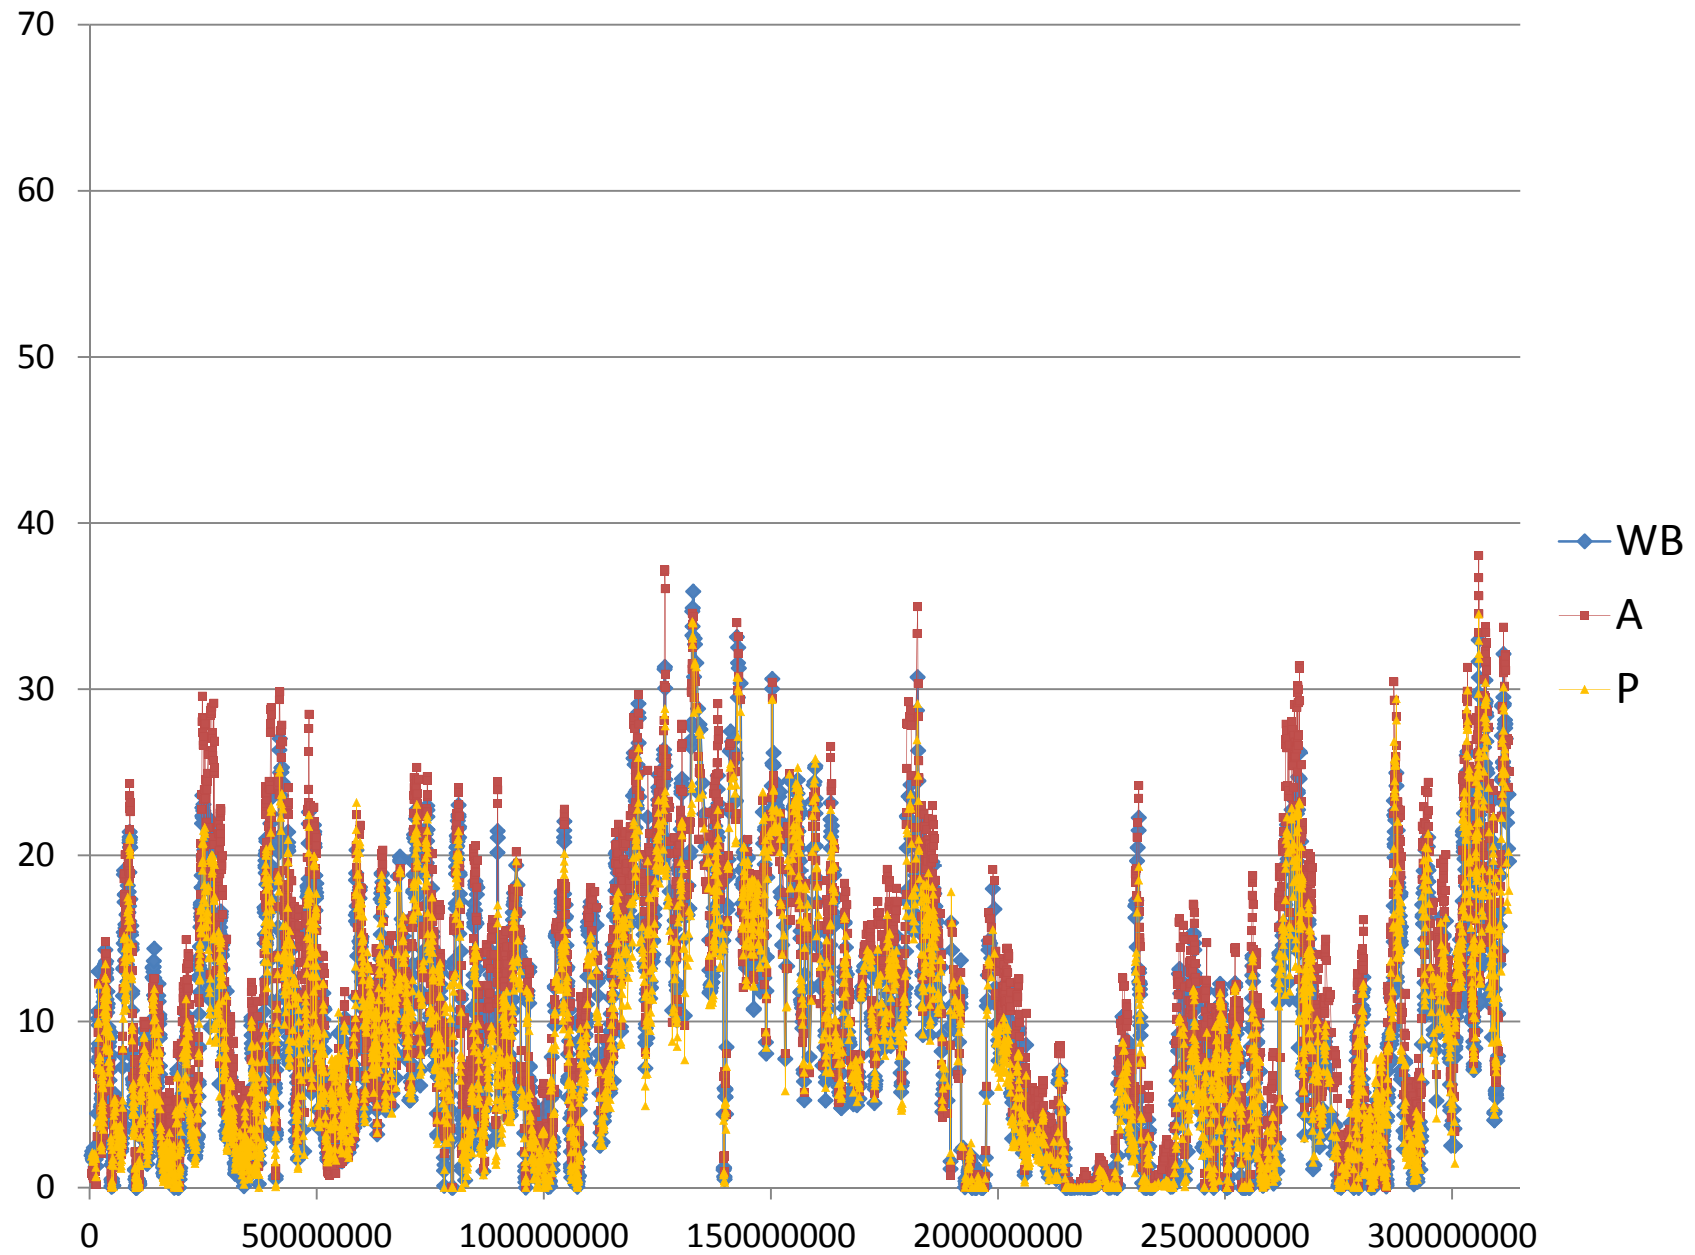

FatPC - Chromosome 2

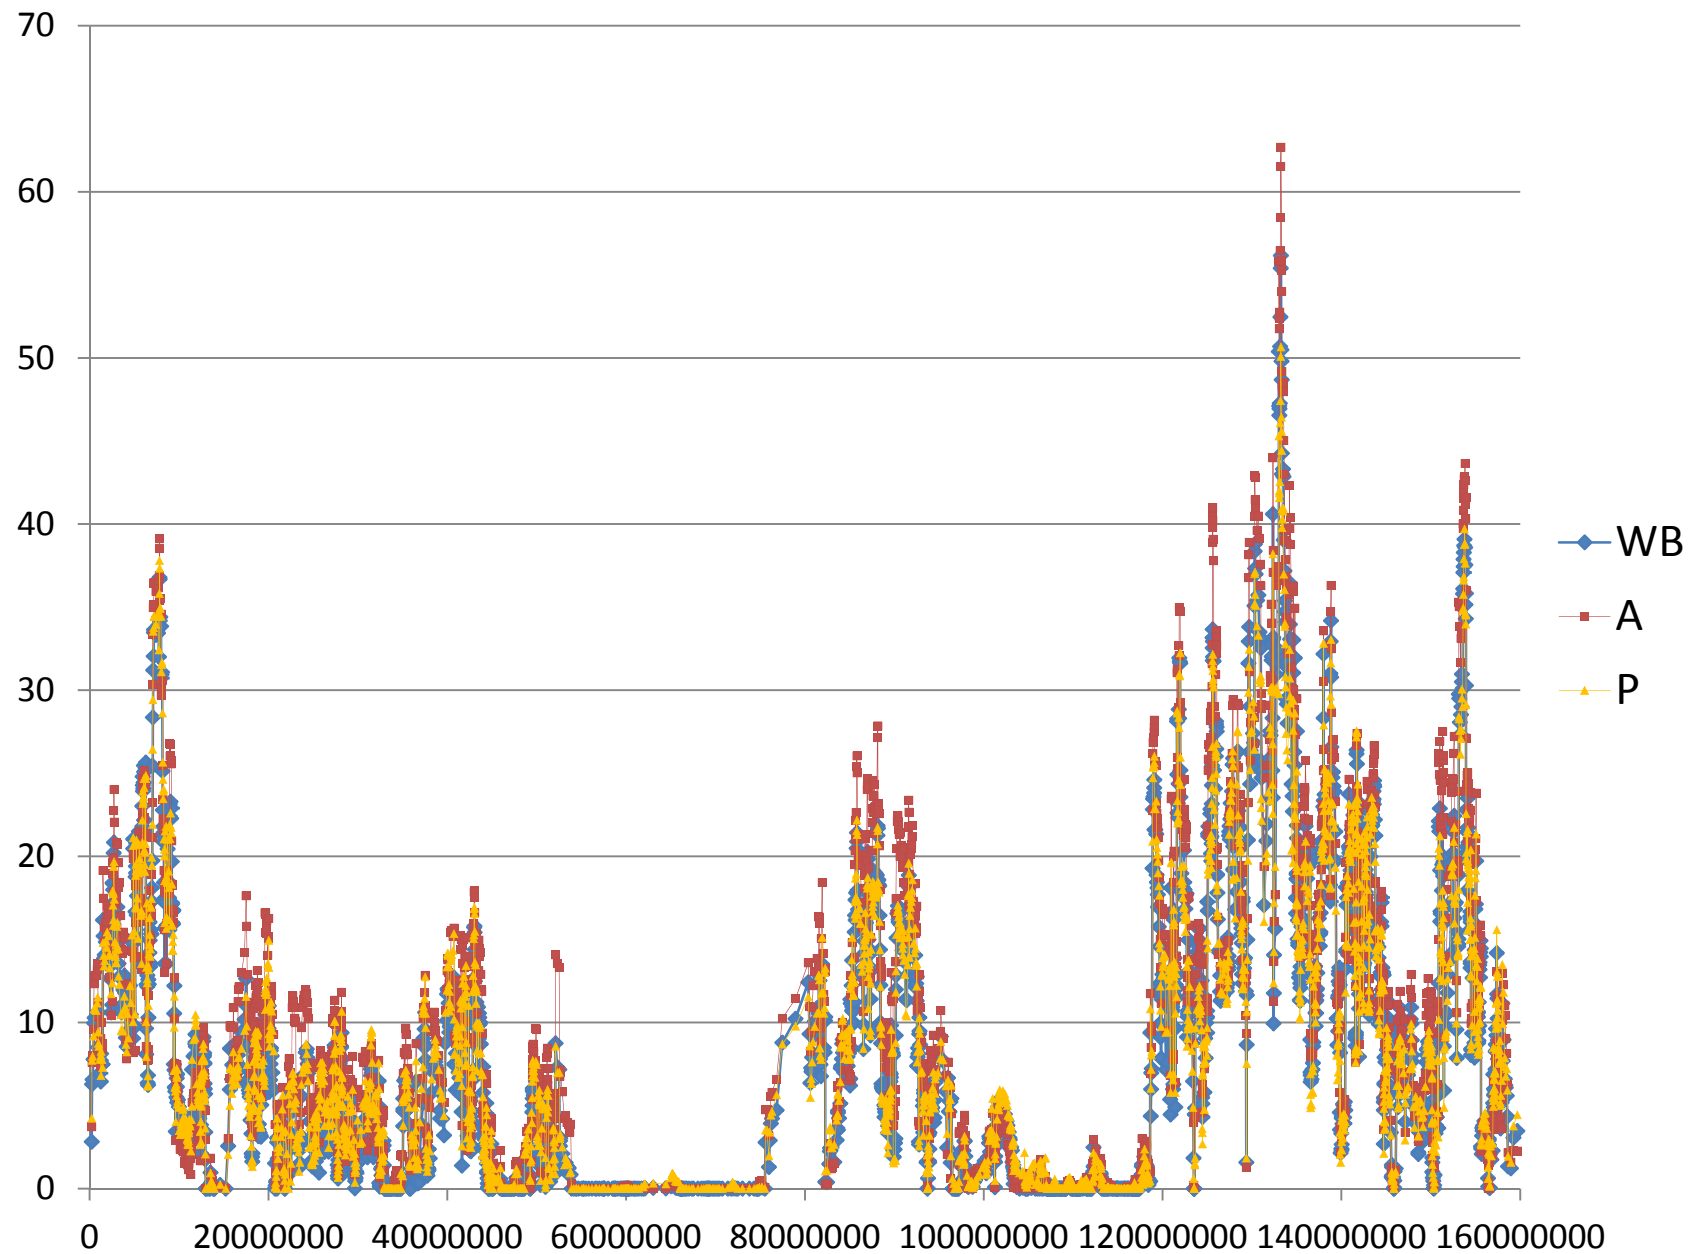

# FatPC - Chromosome 3

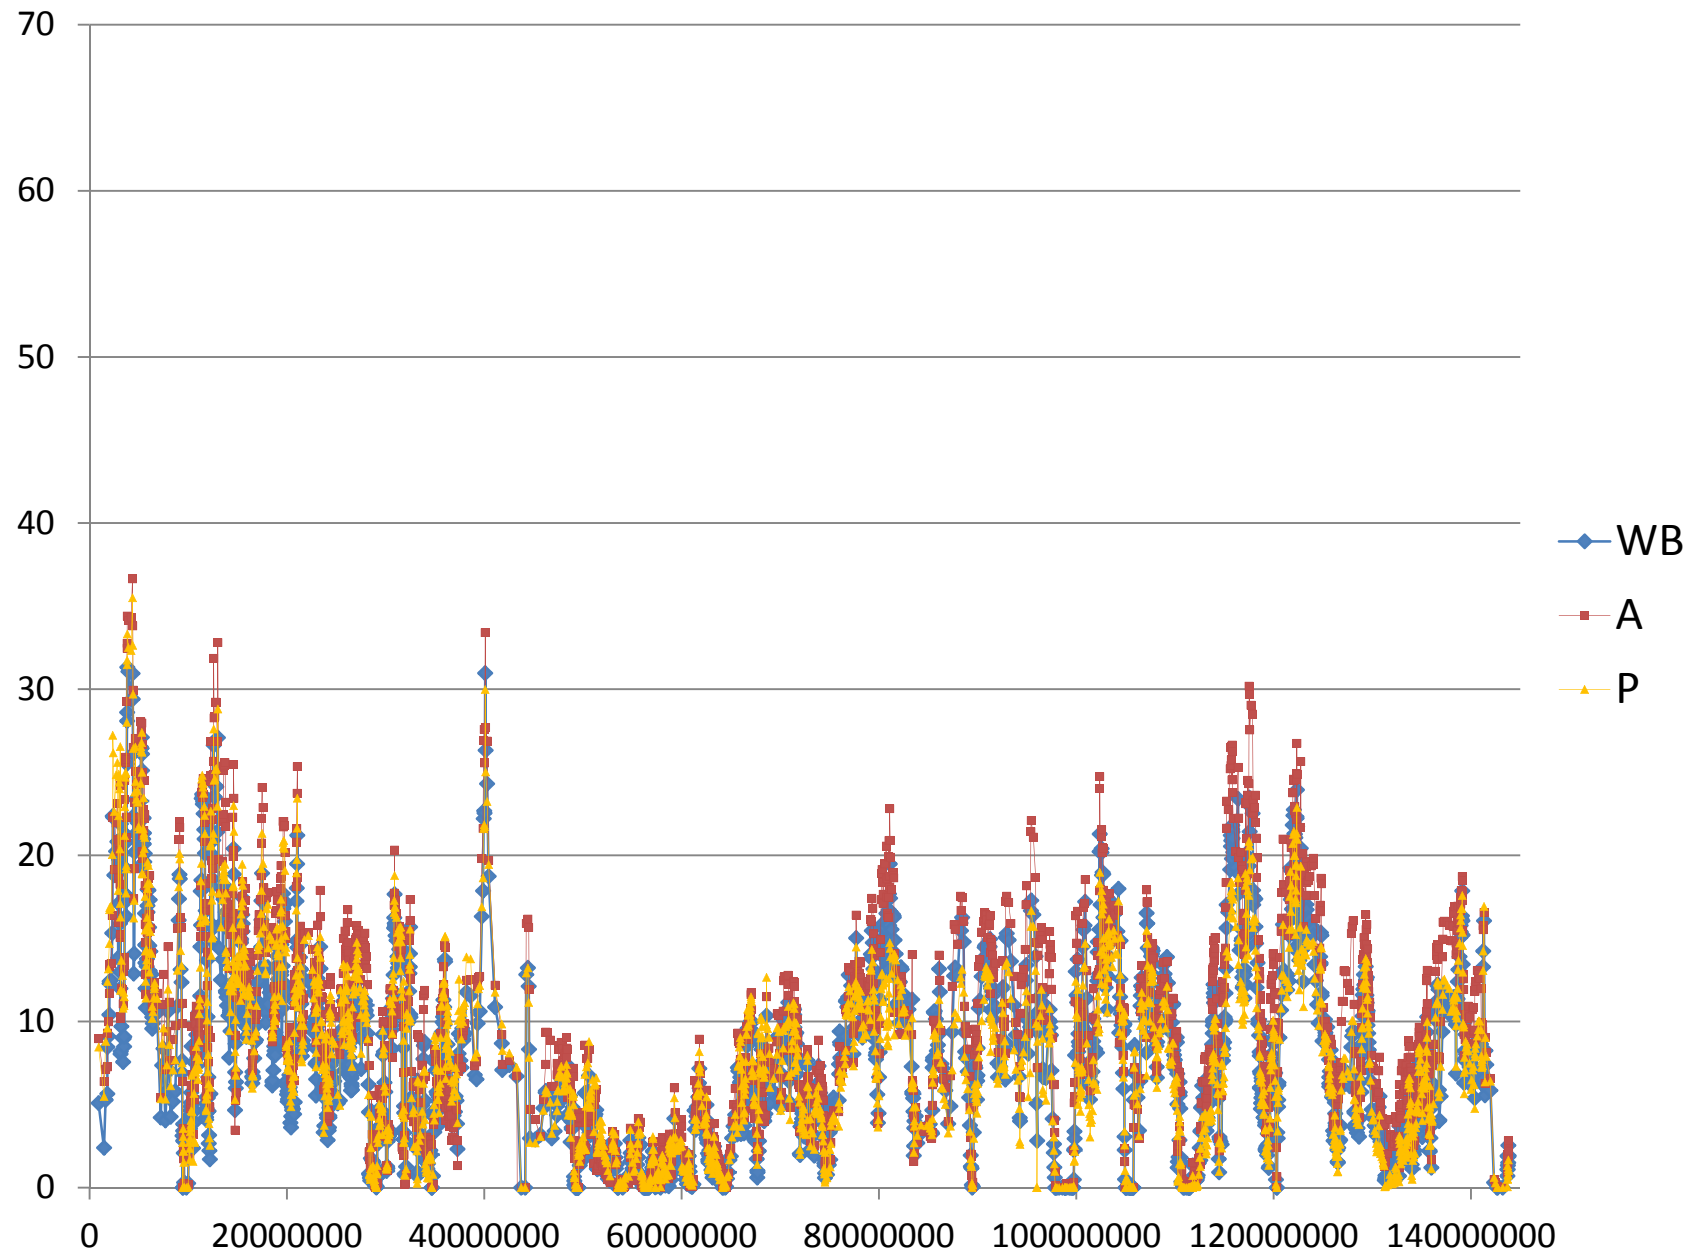

# FatPC - Chromosome 4

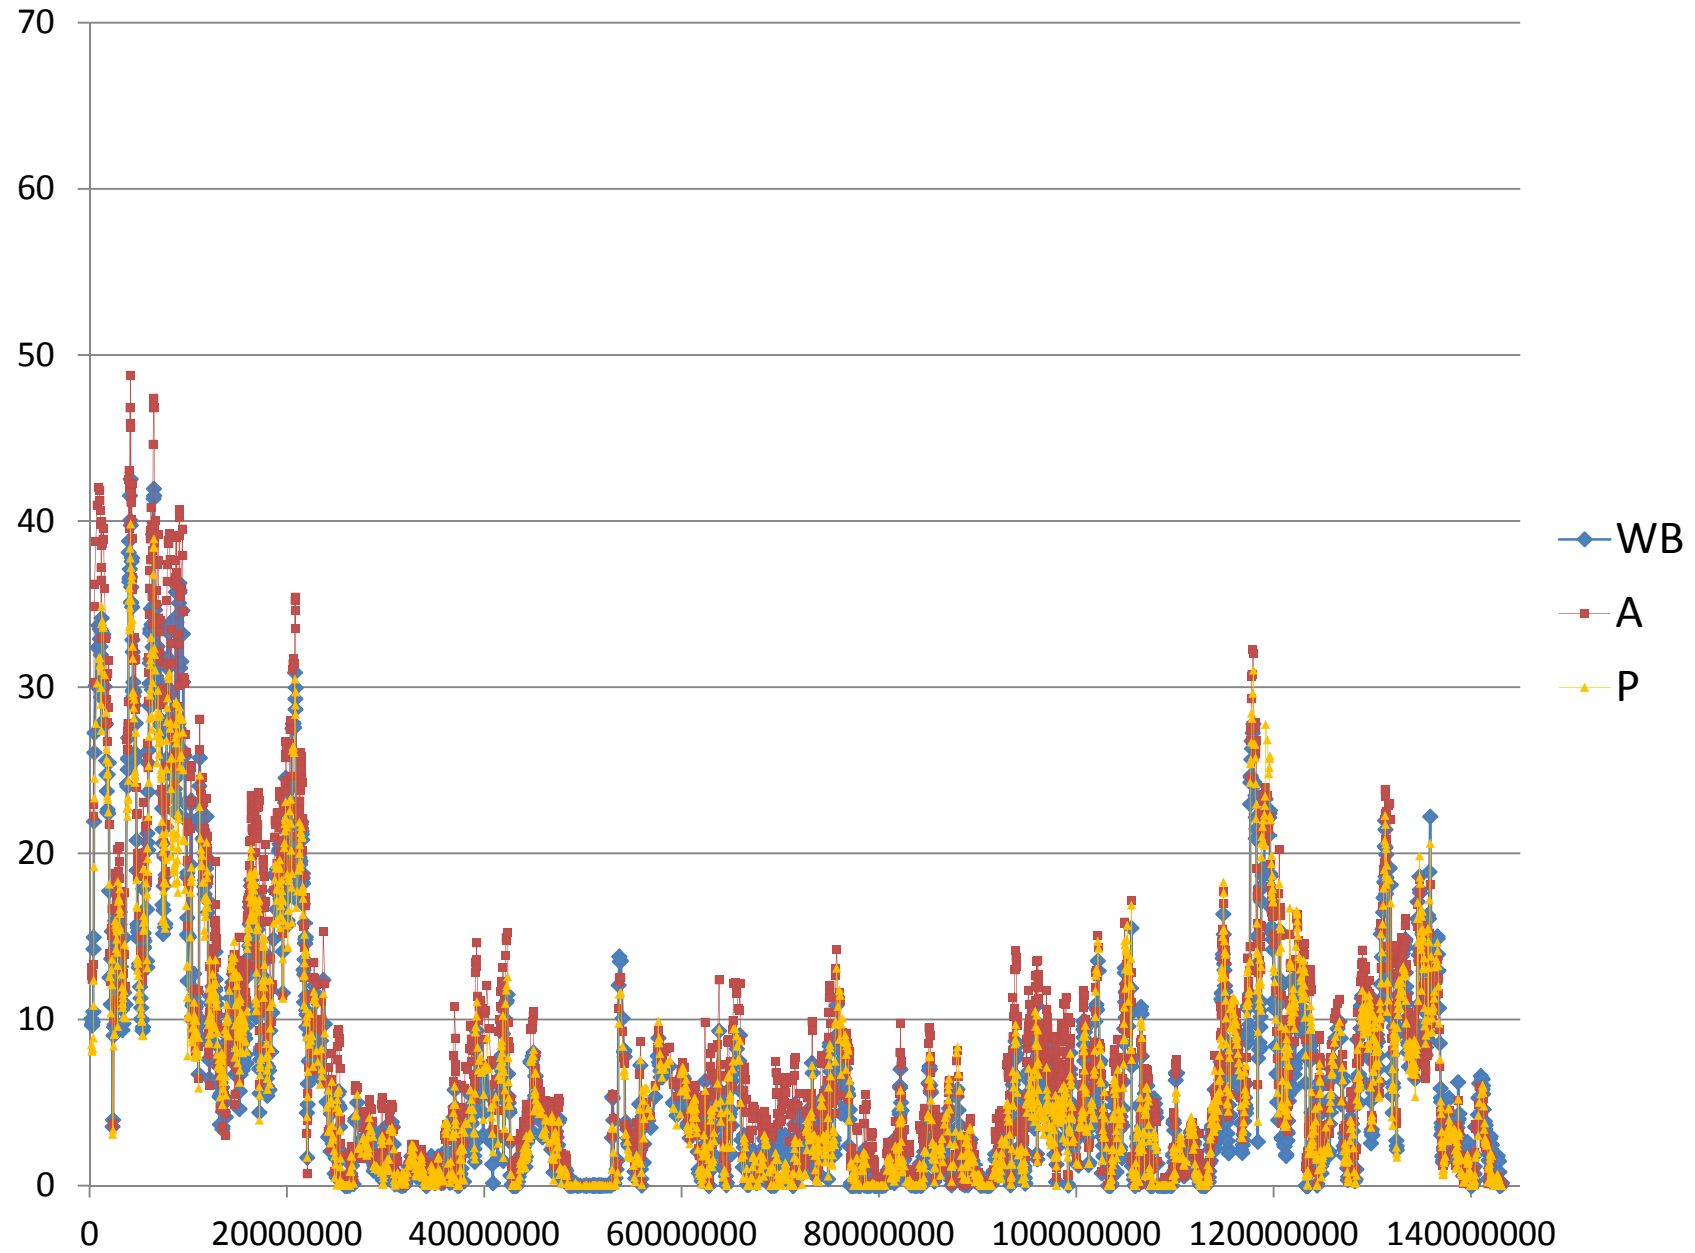

# FatPC - Chromosome 5

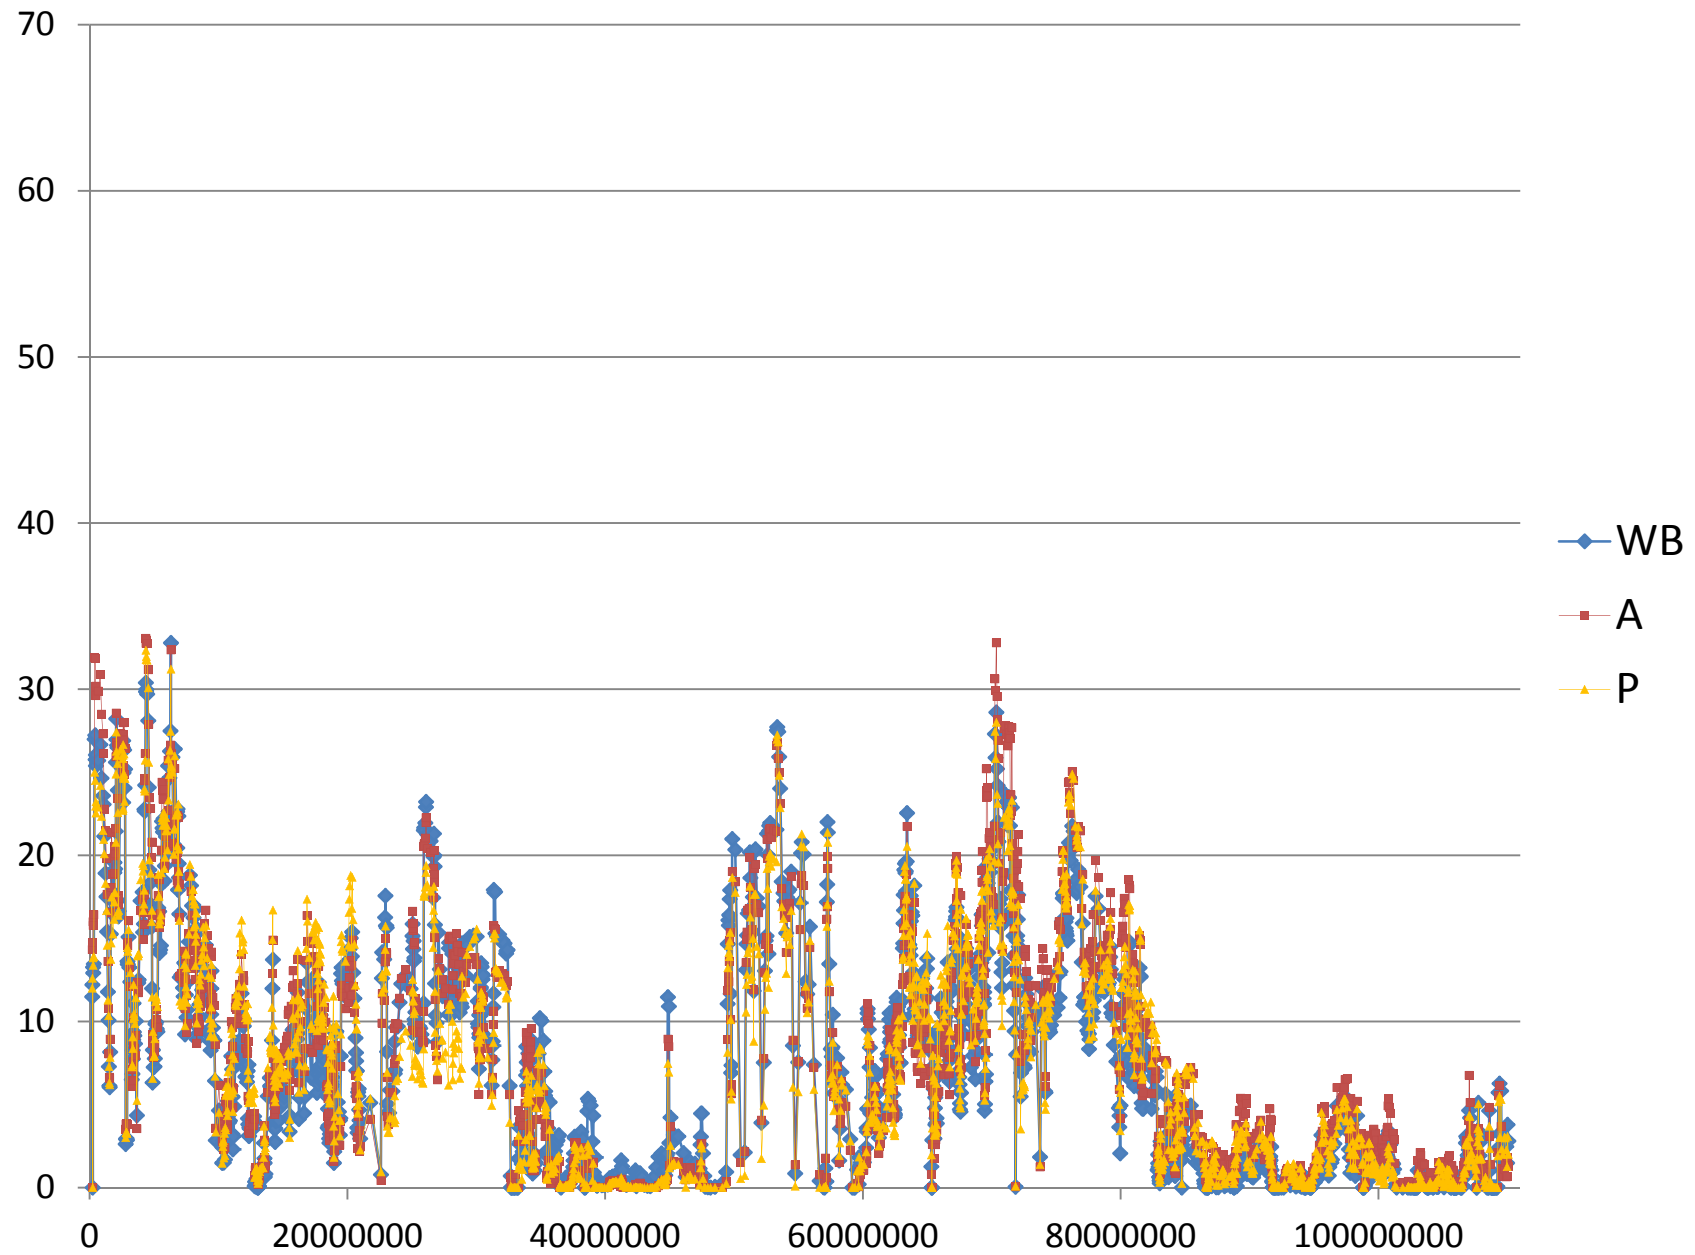

FatPC - Chromosome 6

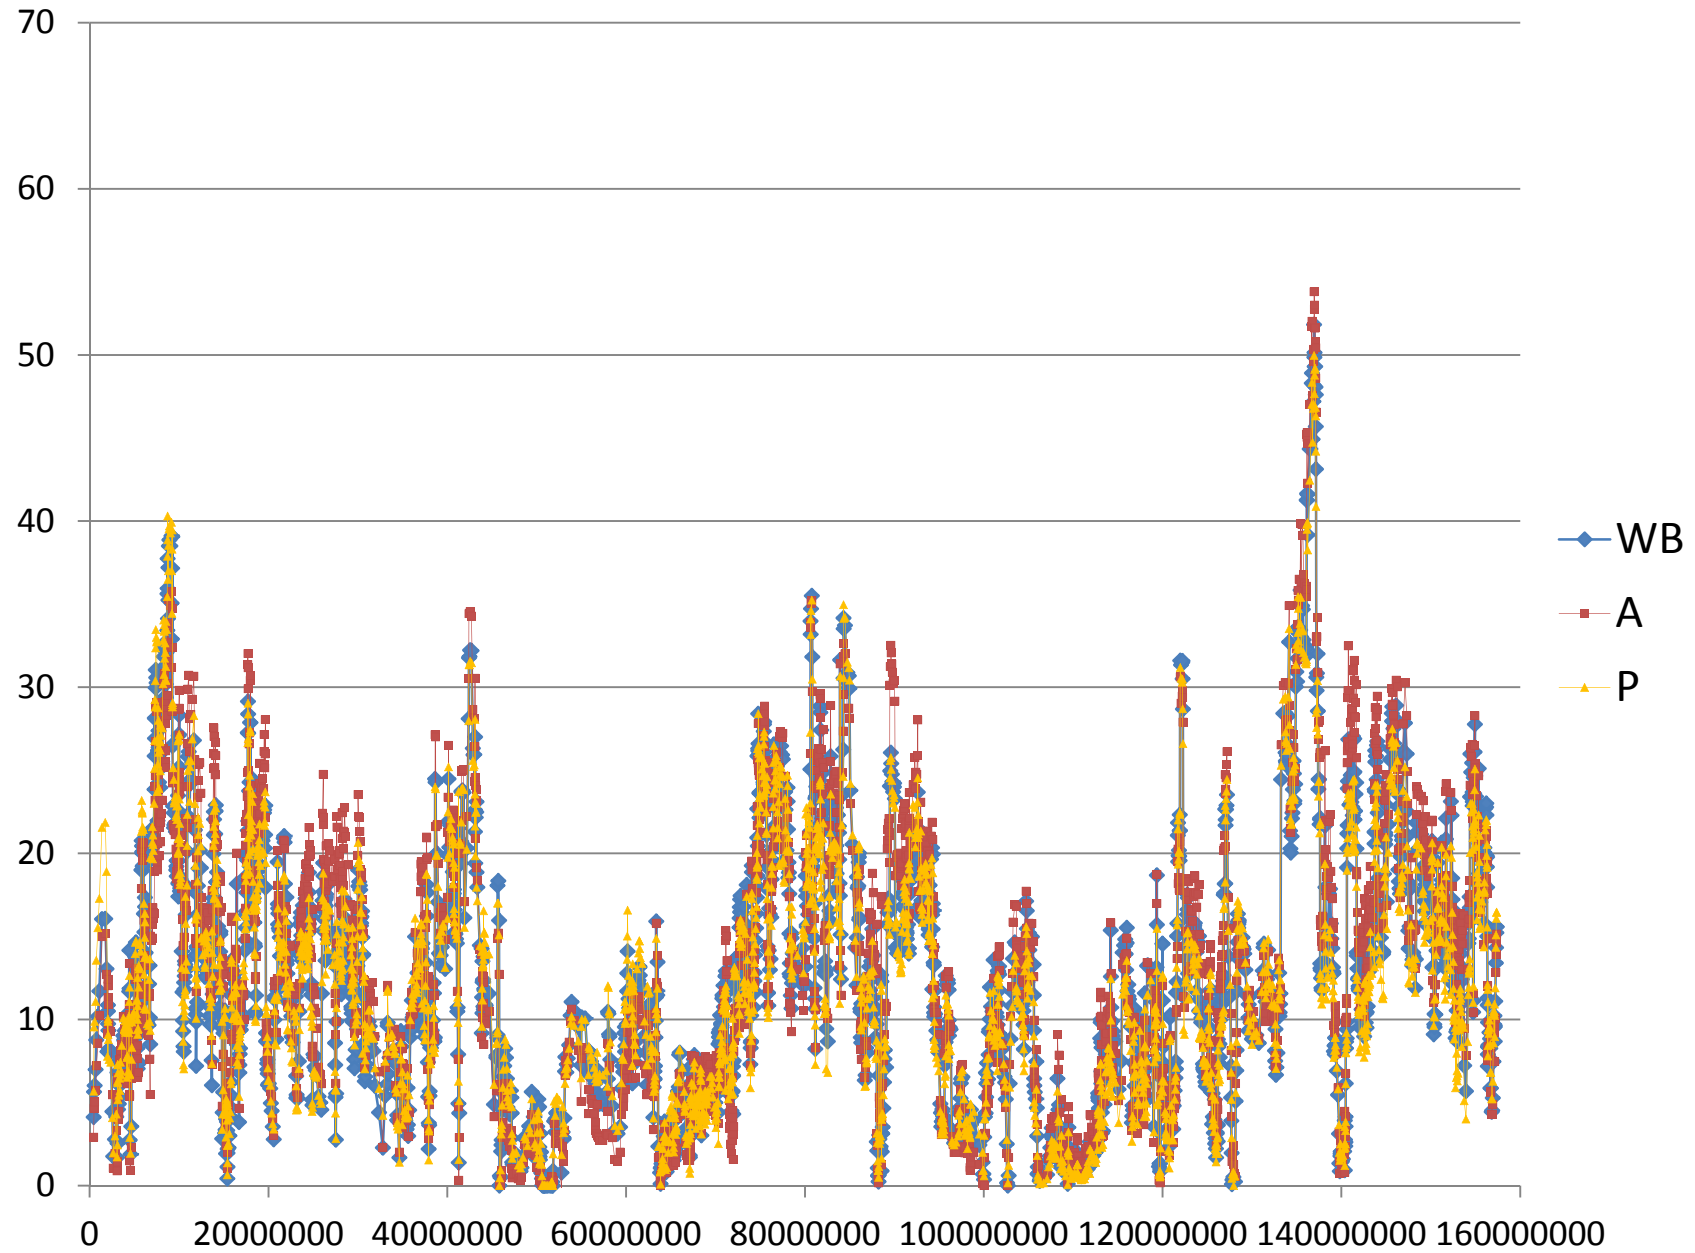

FatPC - Chromosome 7

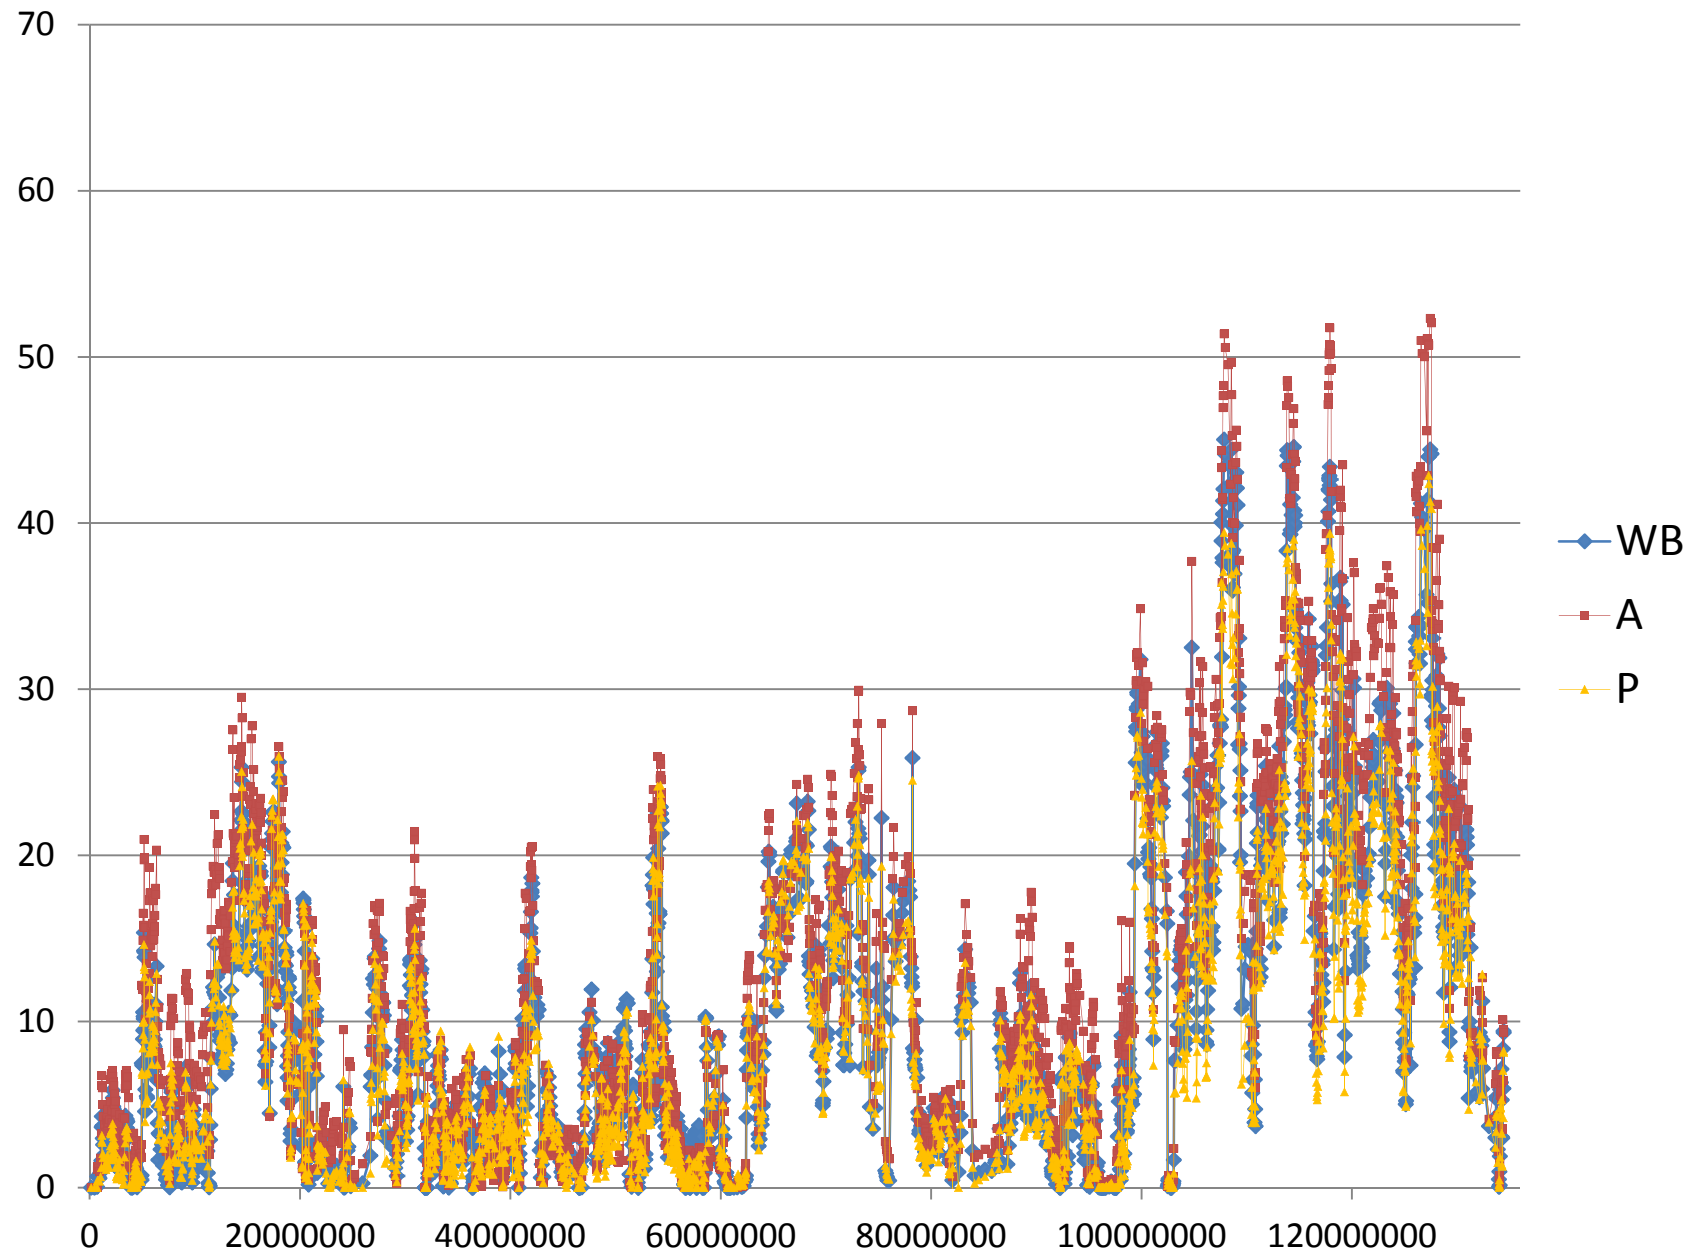

FatPC - Chromosome 8

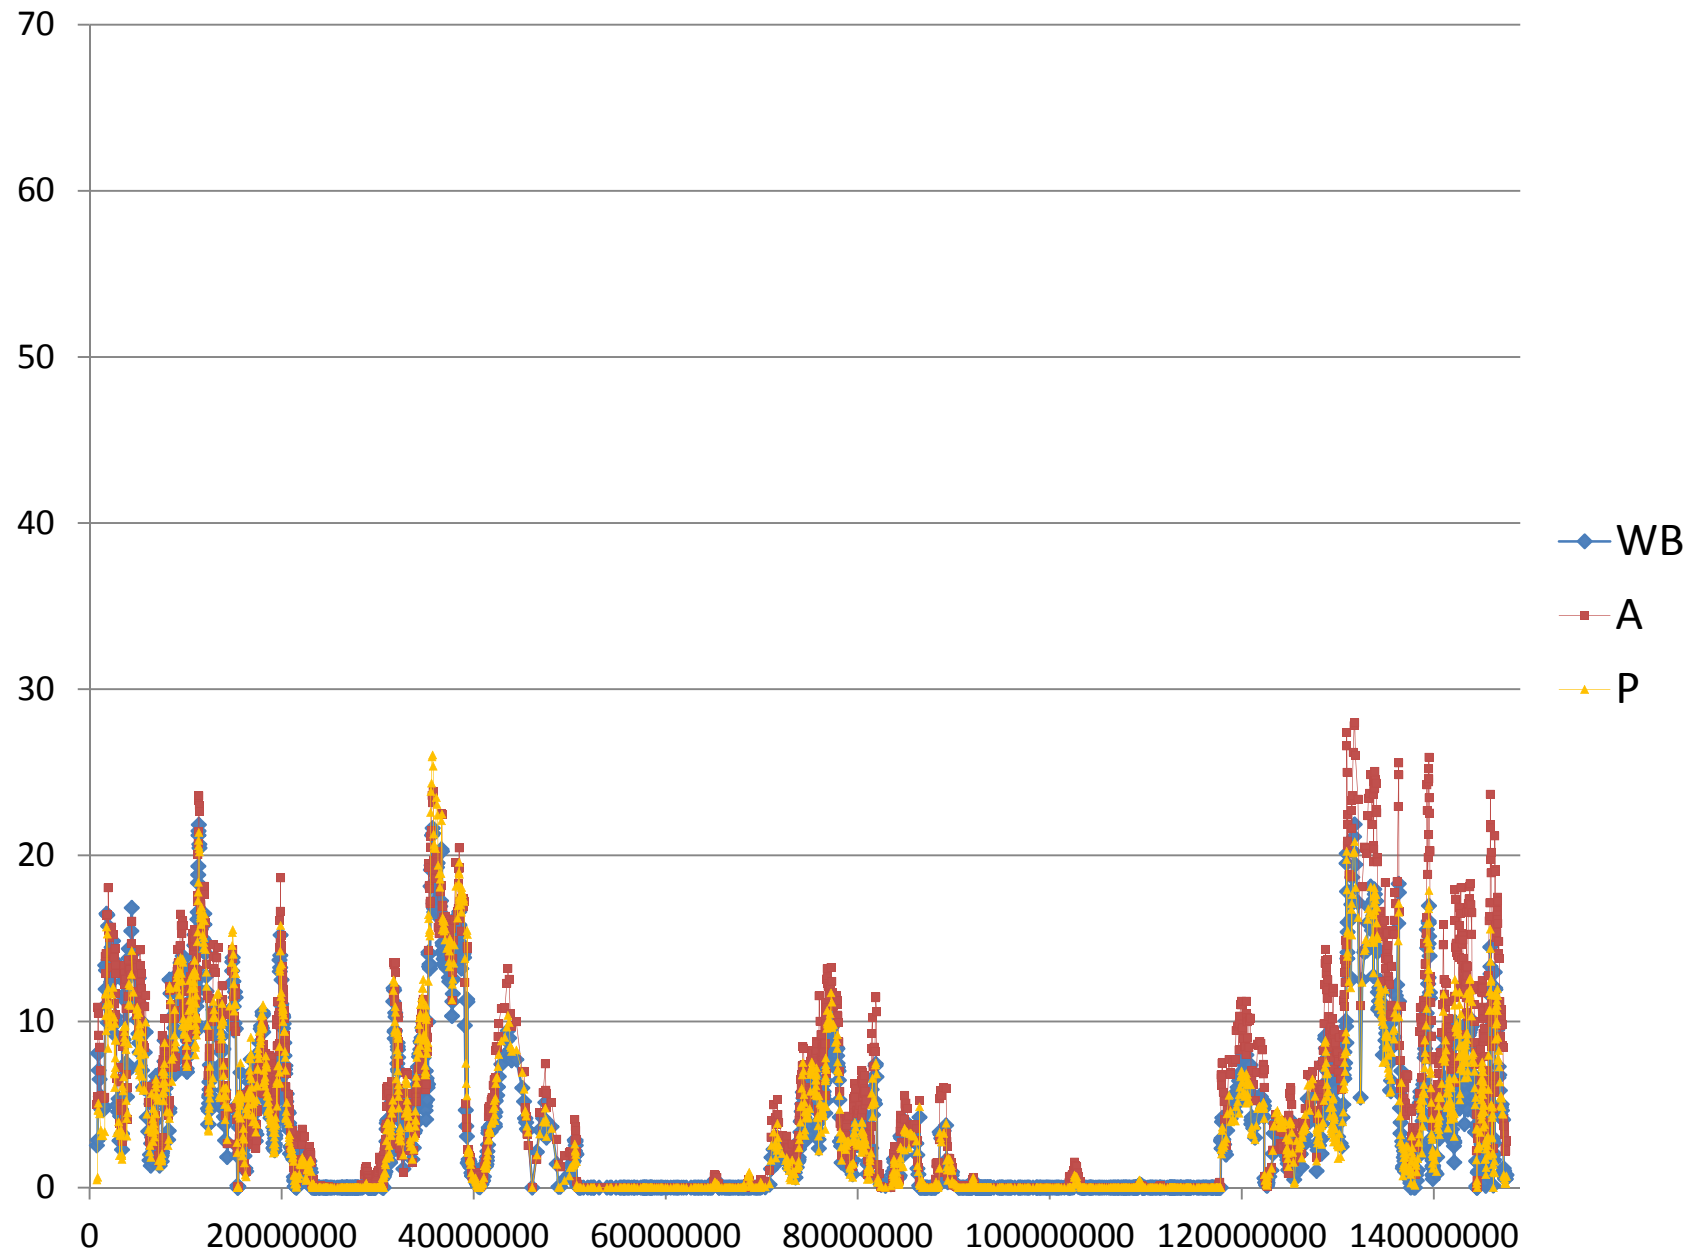



# FatPC - Chromosome 9

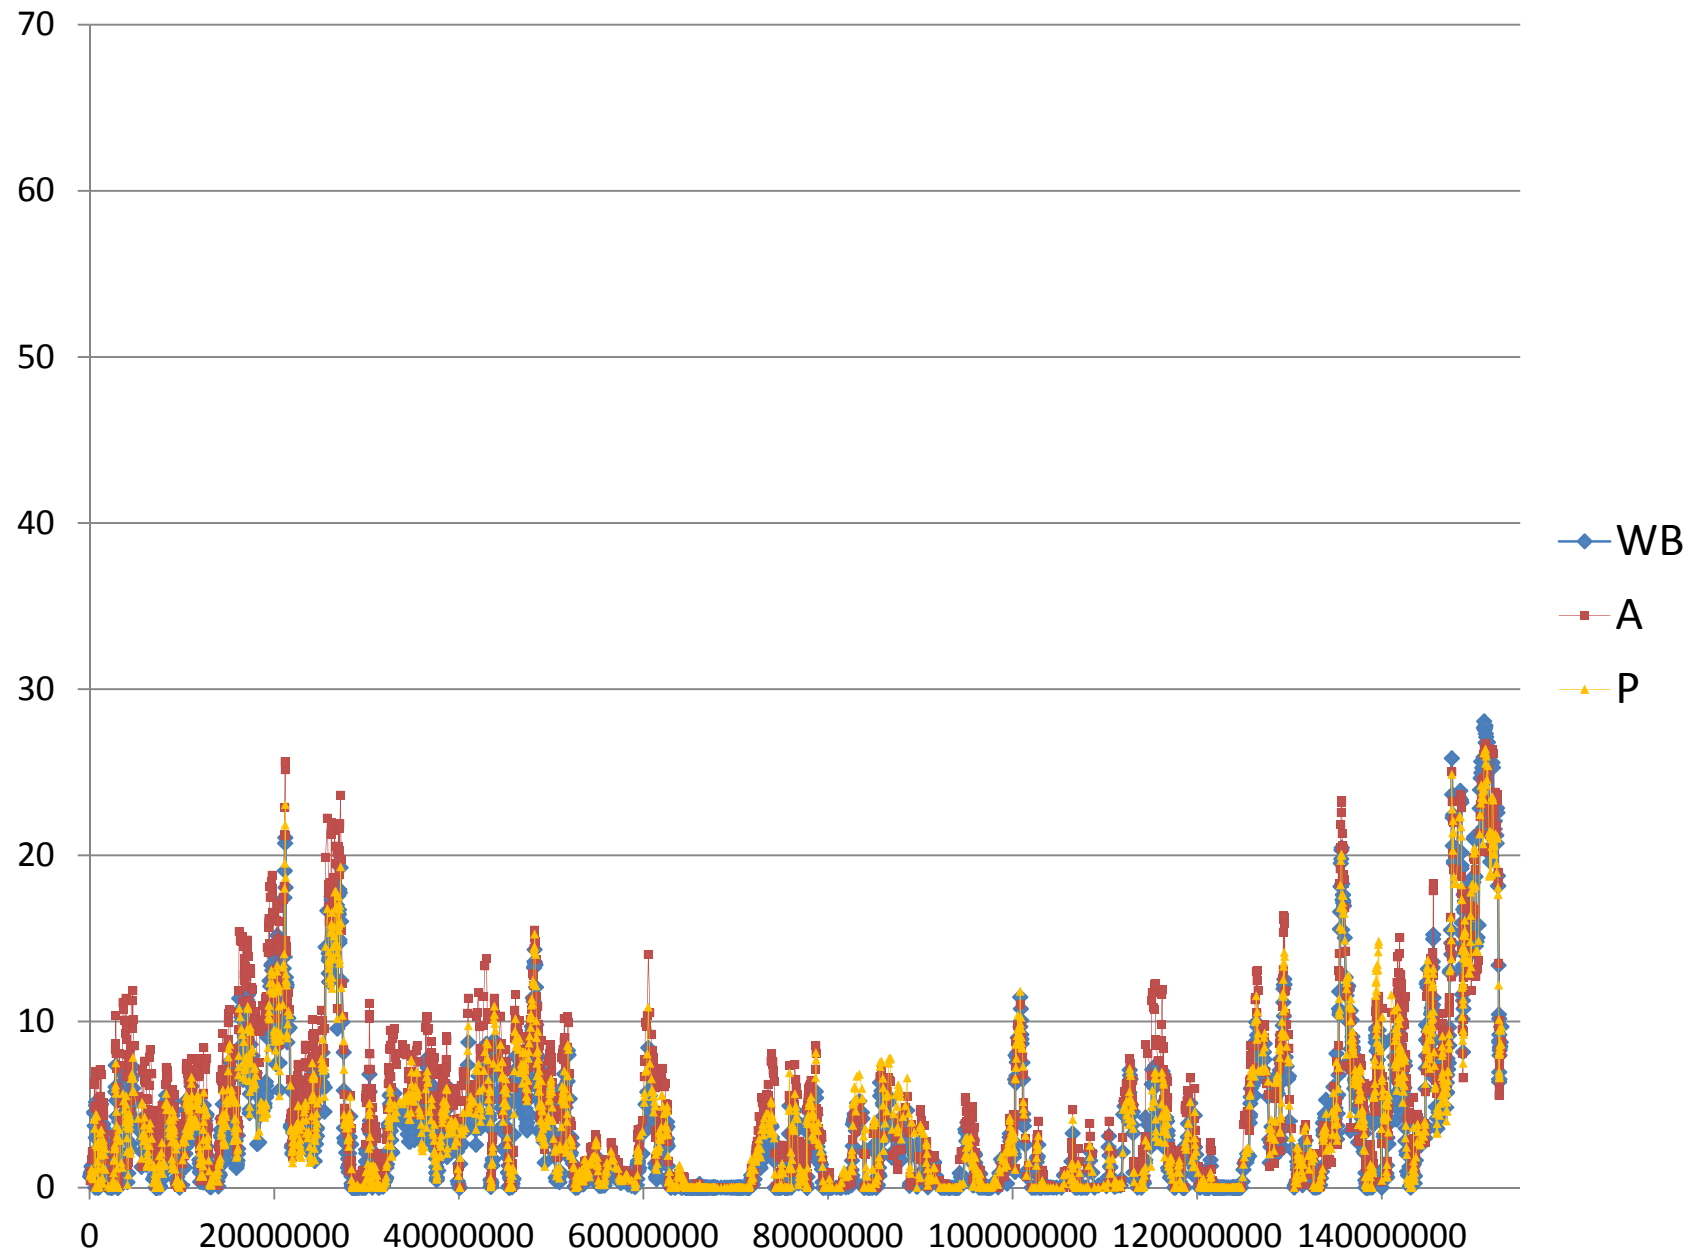

FatPC - Chromosome 10

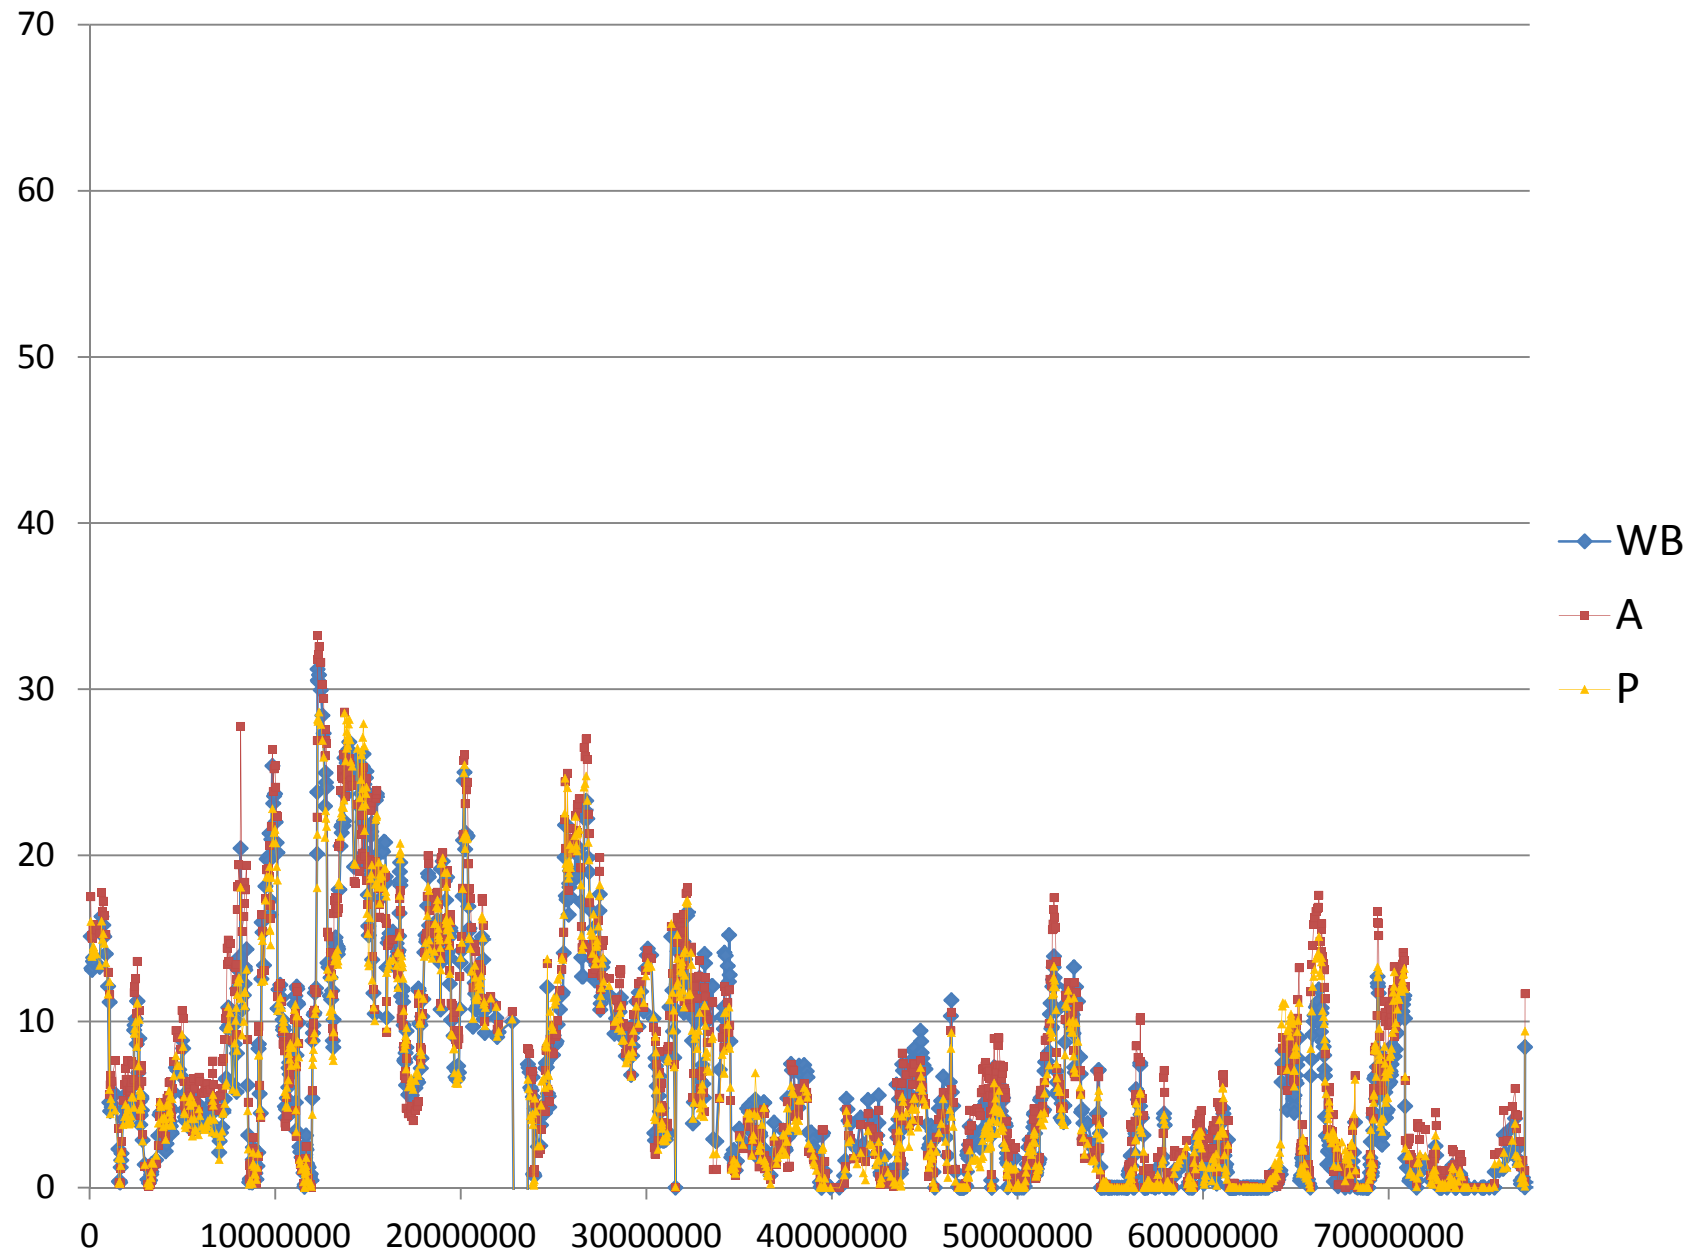

FatPC - Chromosome 11

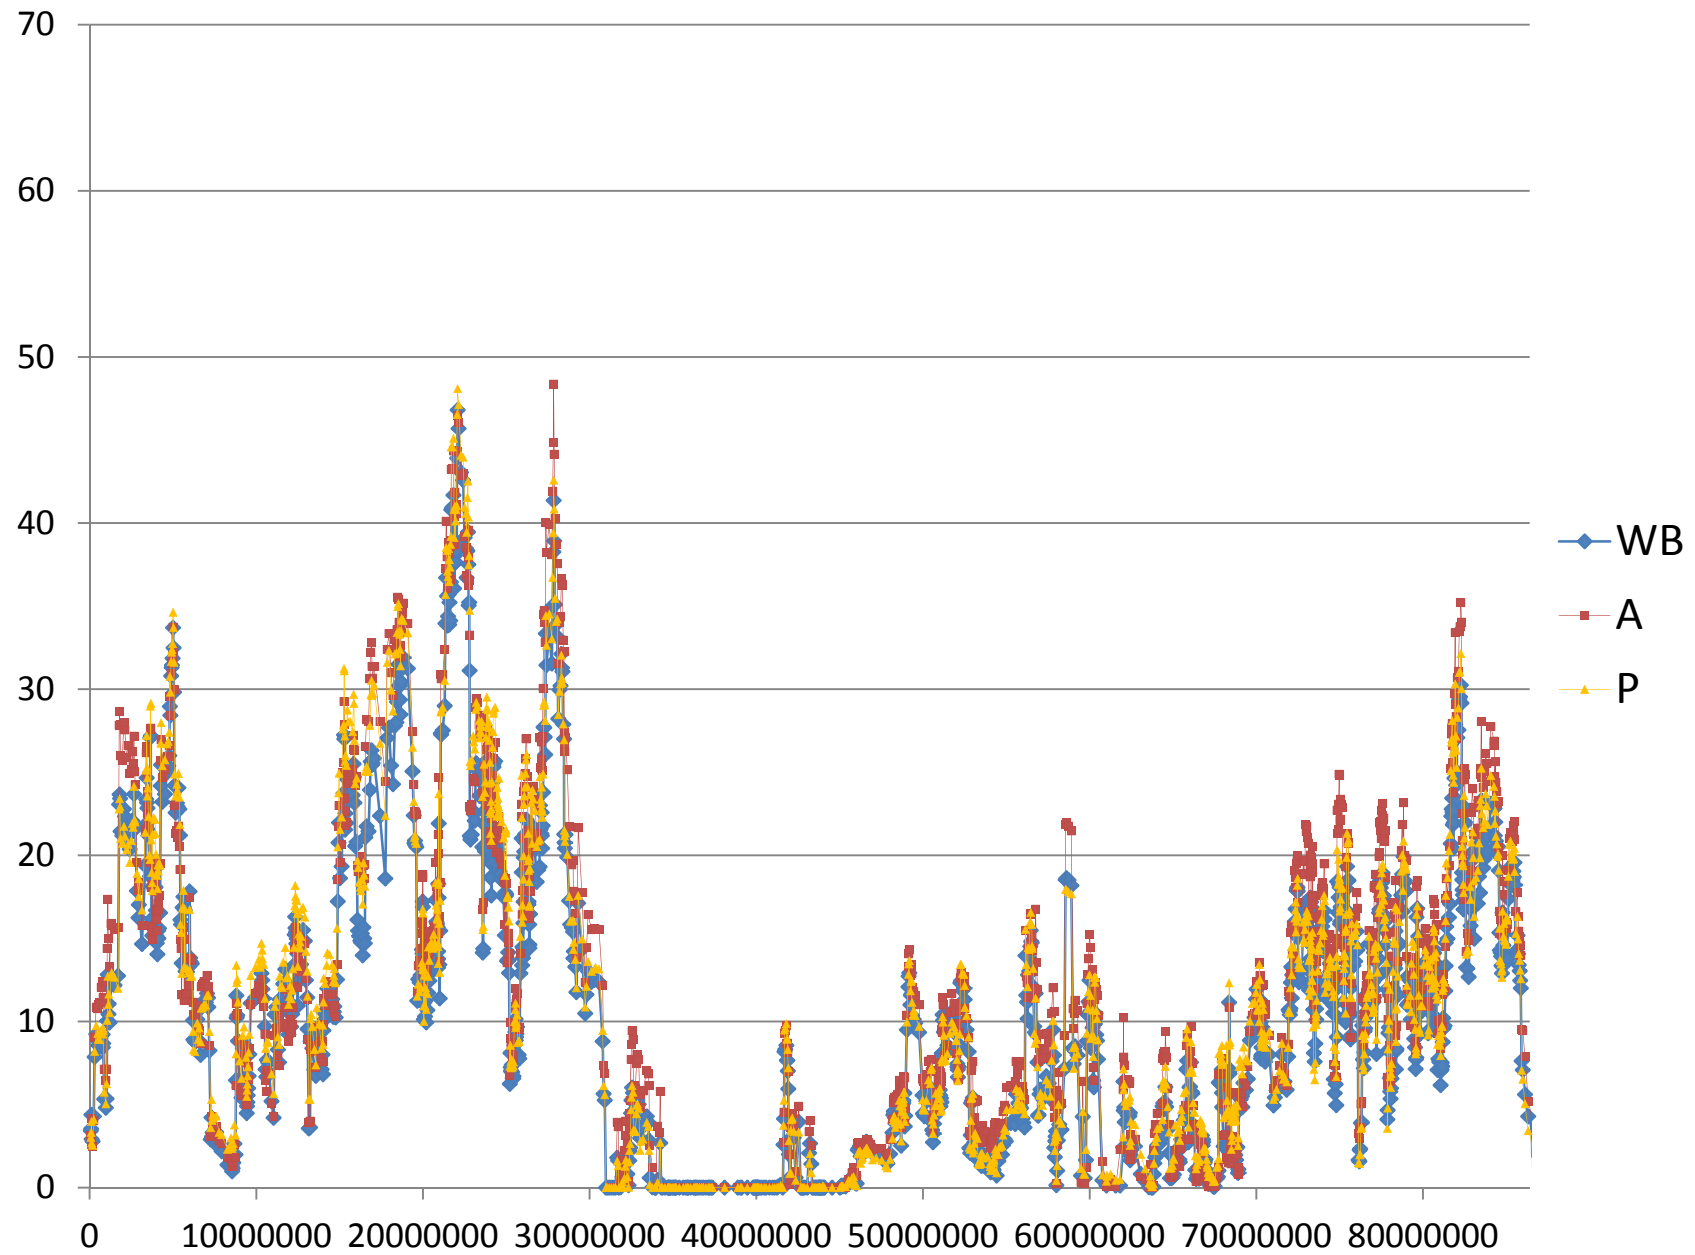

FatPC - Chromosome 12

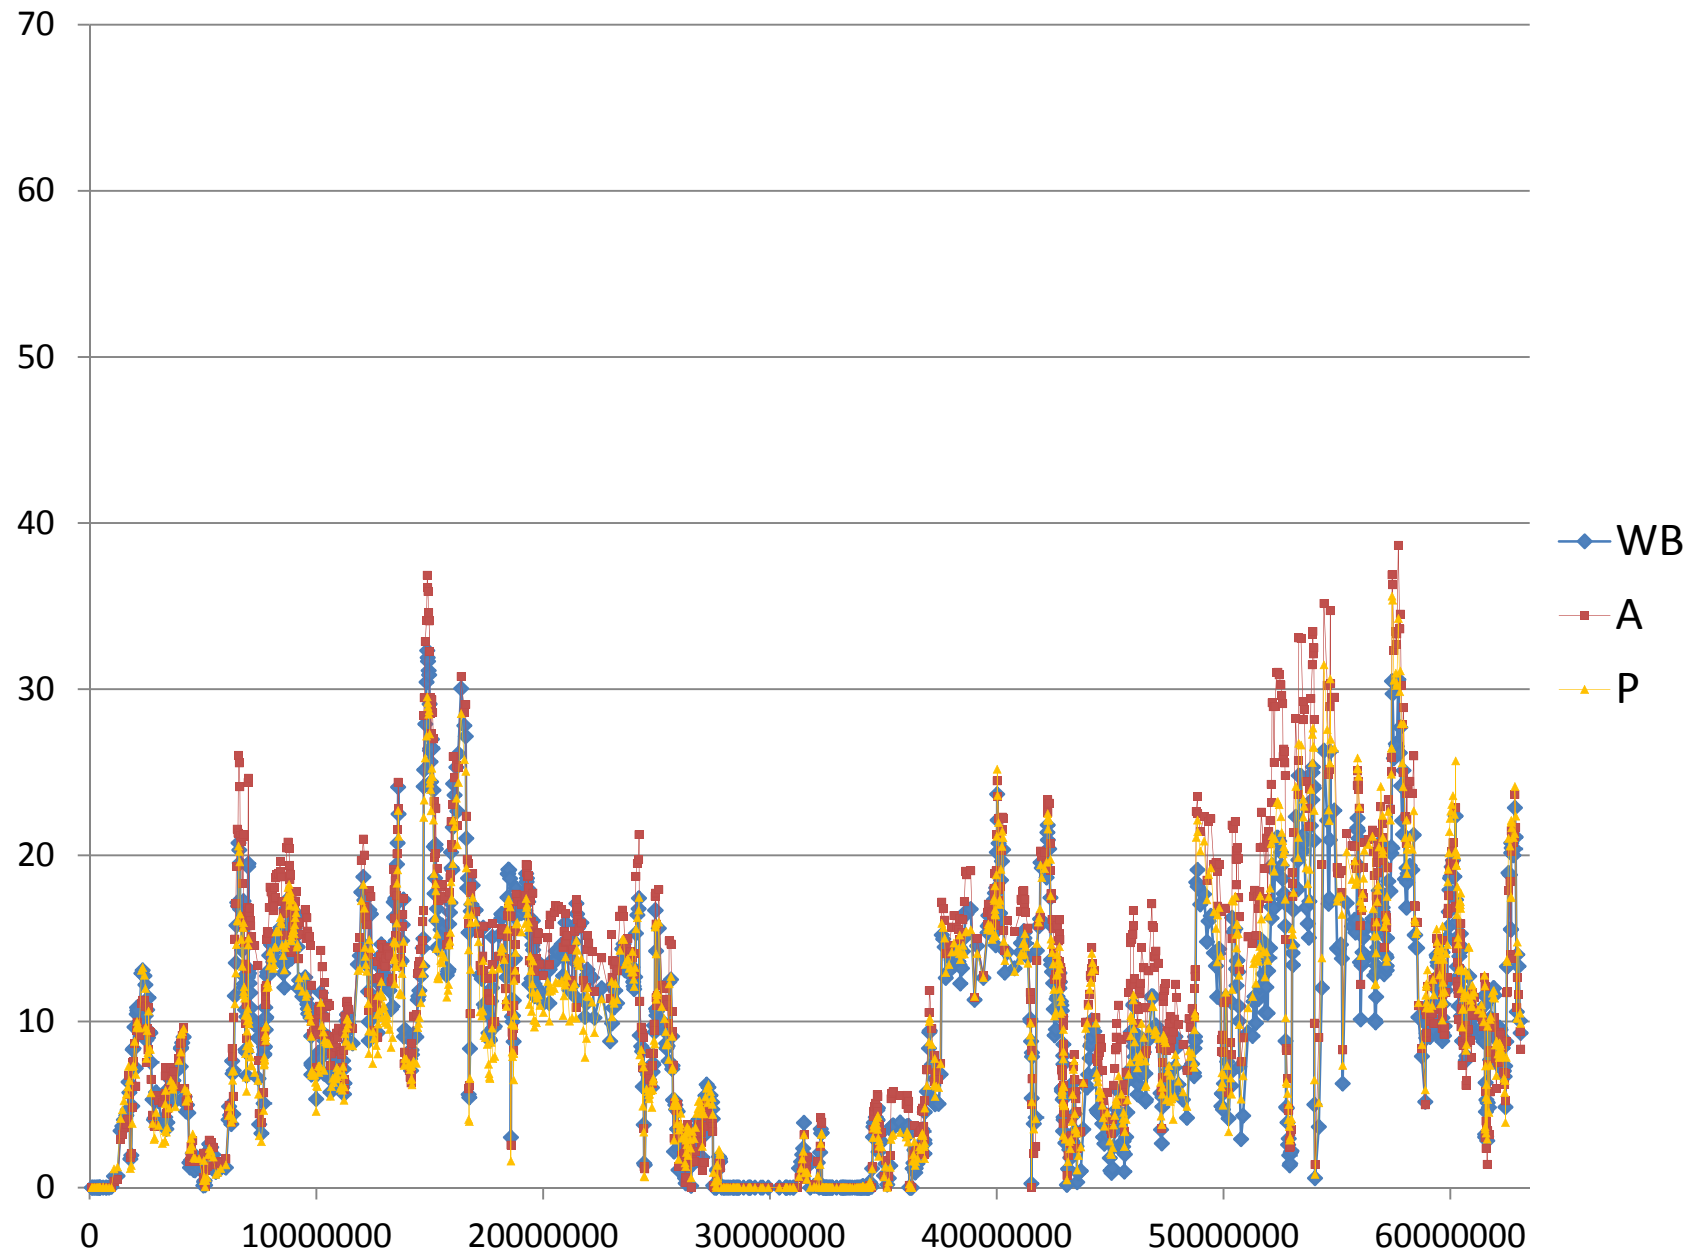

FatPC - Chromosome 13

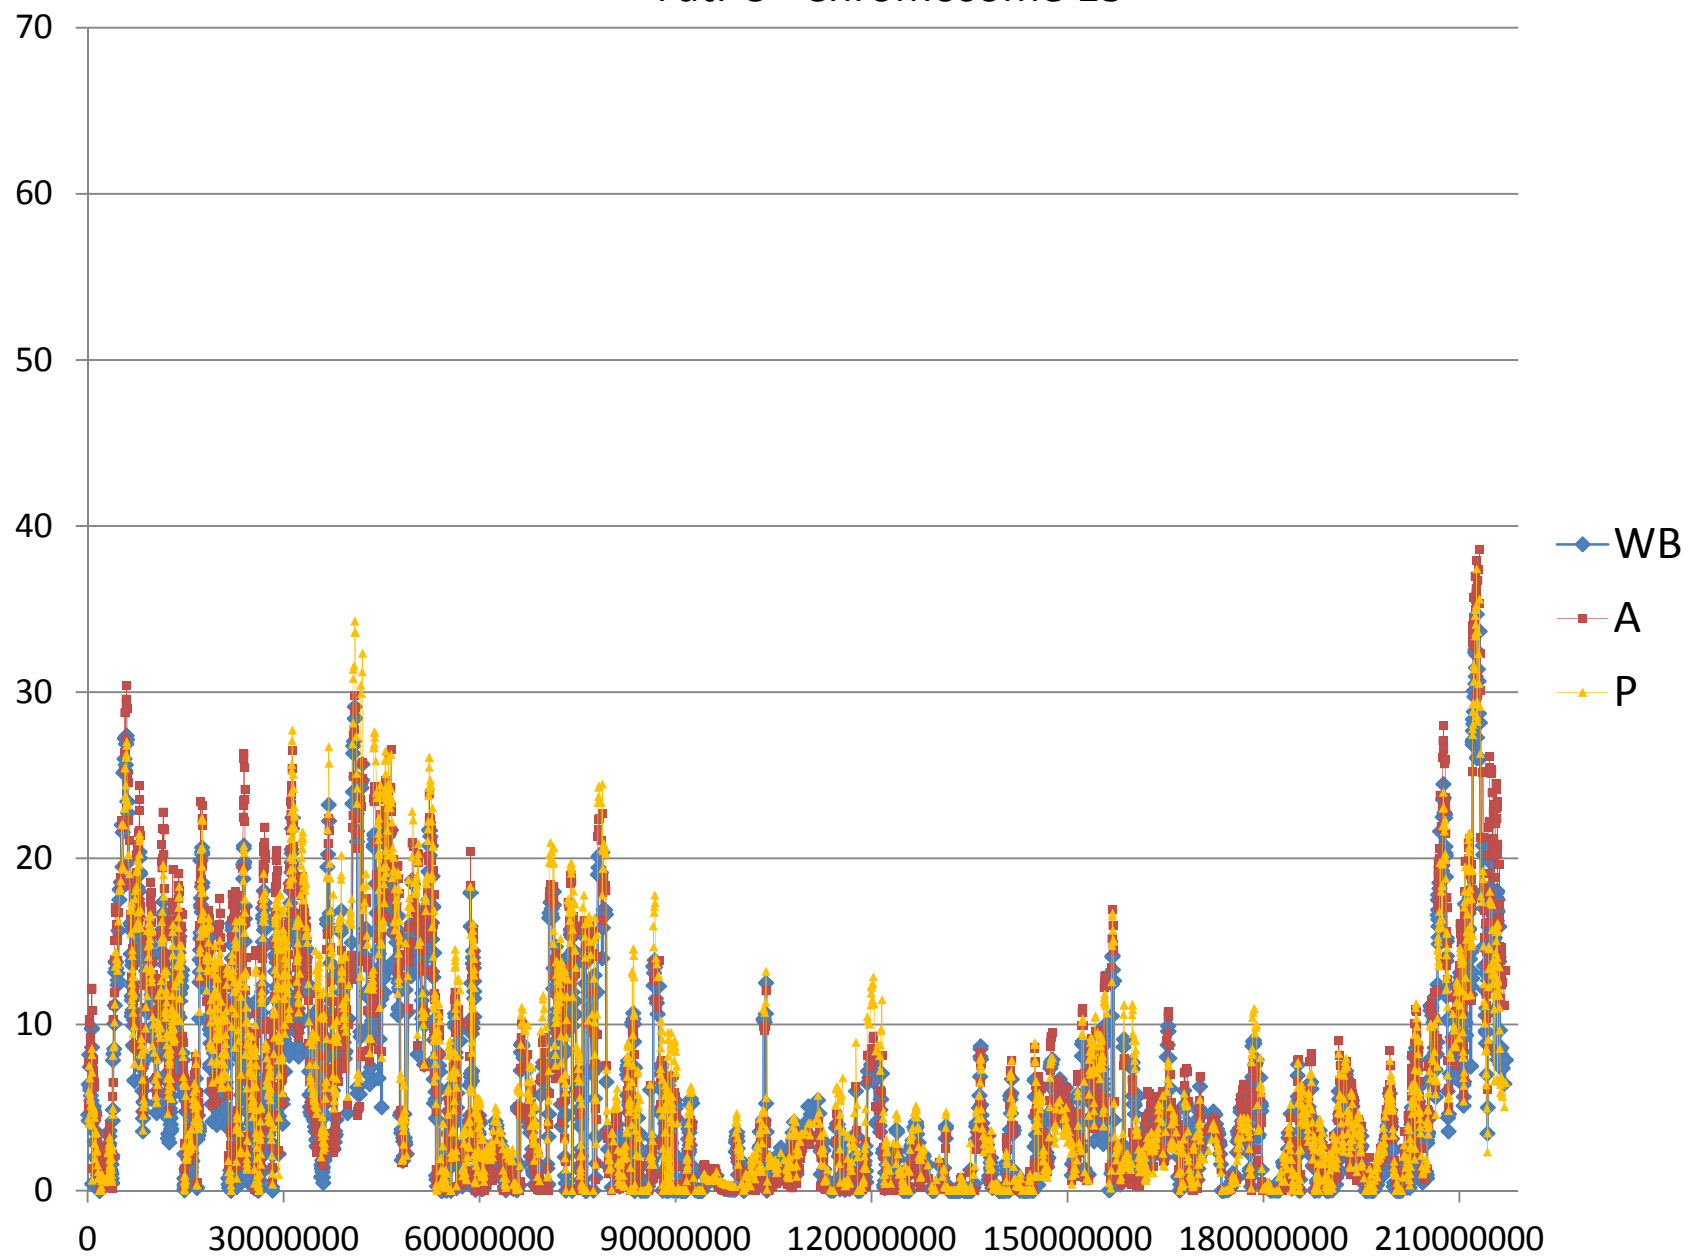

FatPC - Chromosome 14

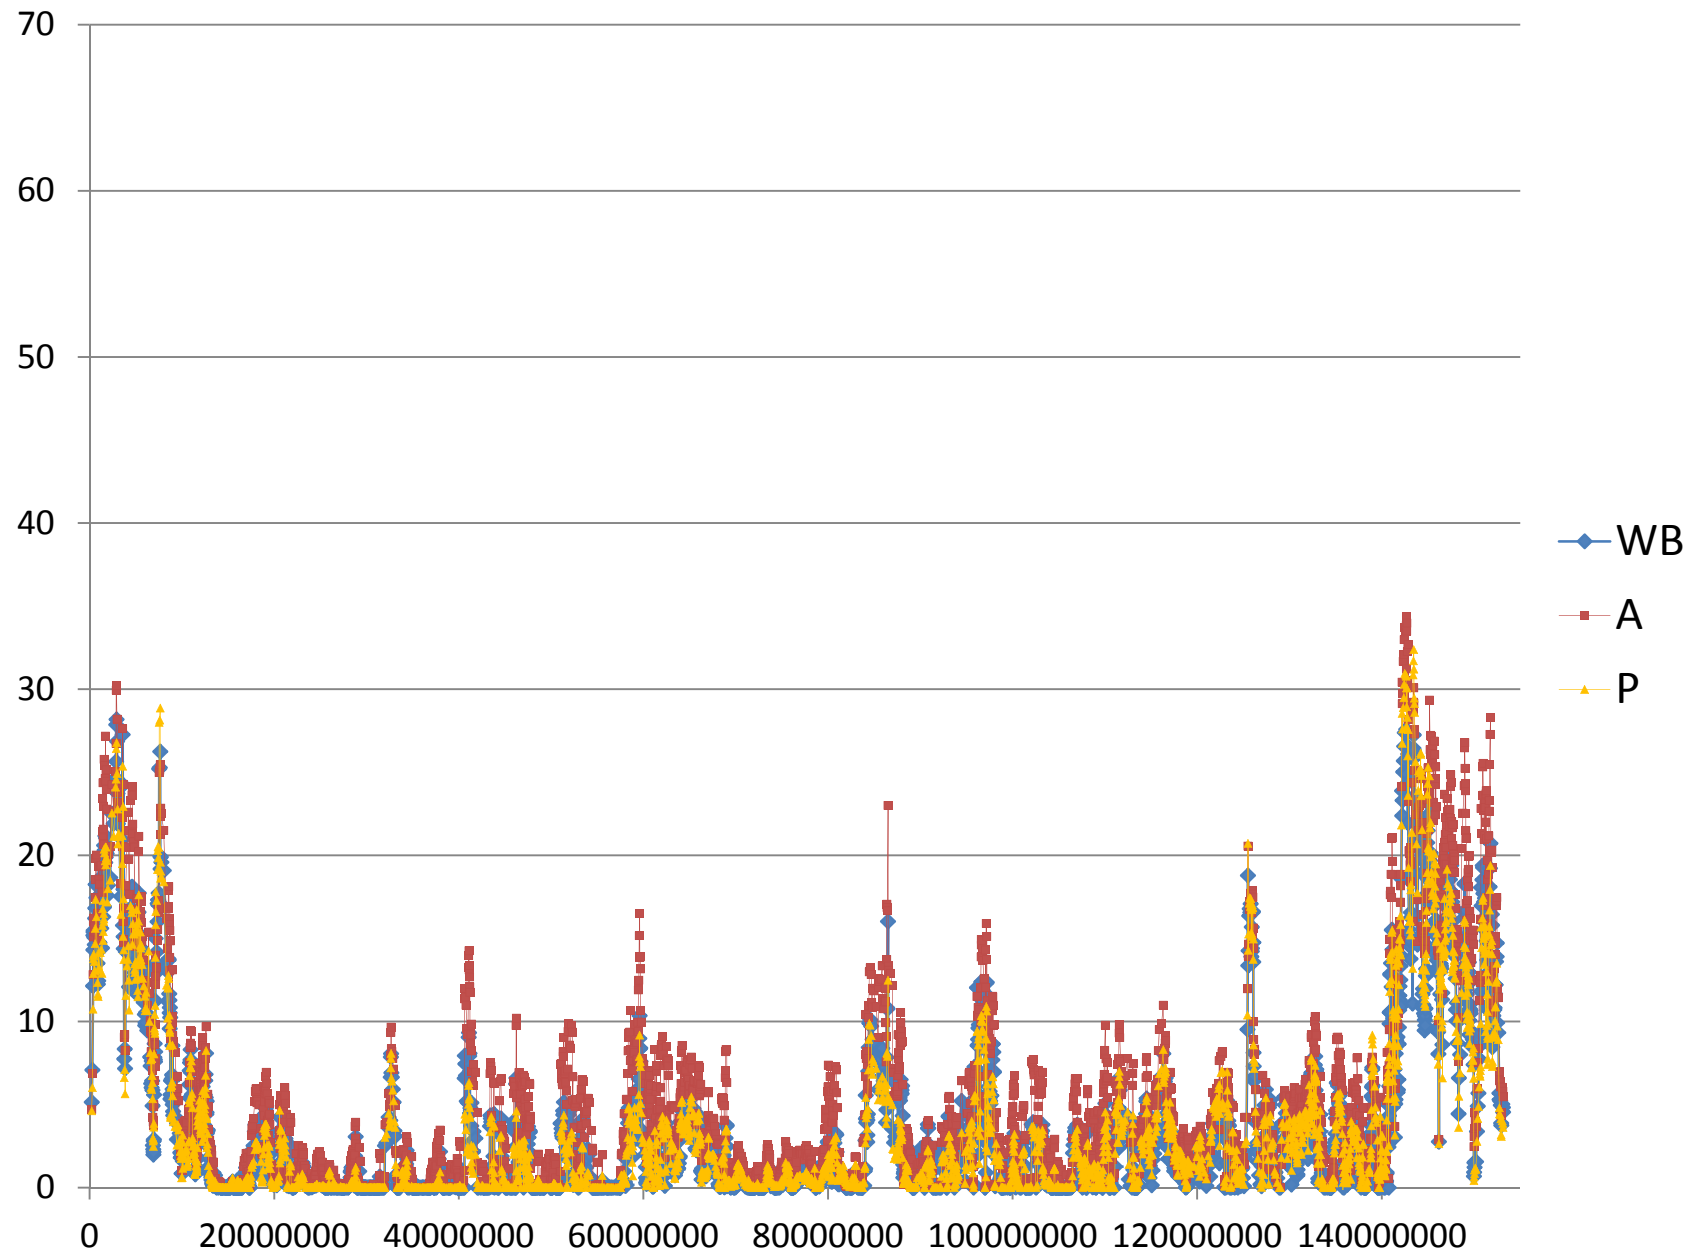

FatPC - Chromosome 15

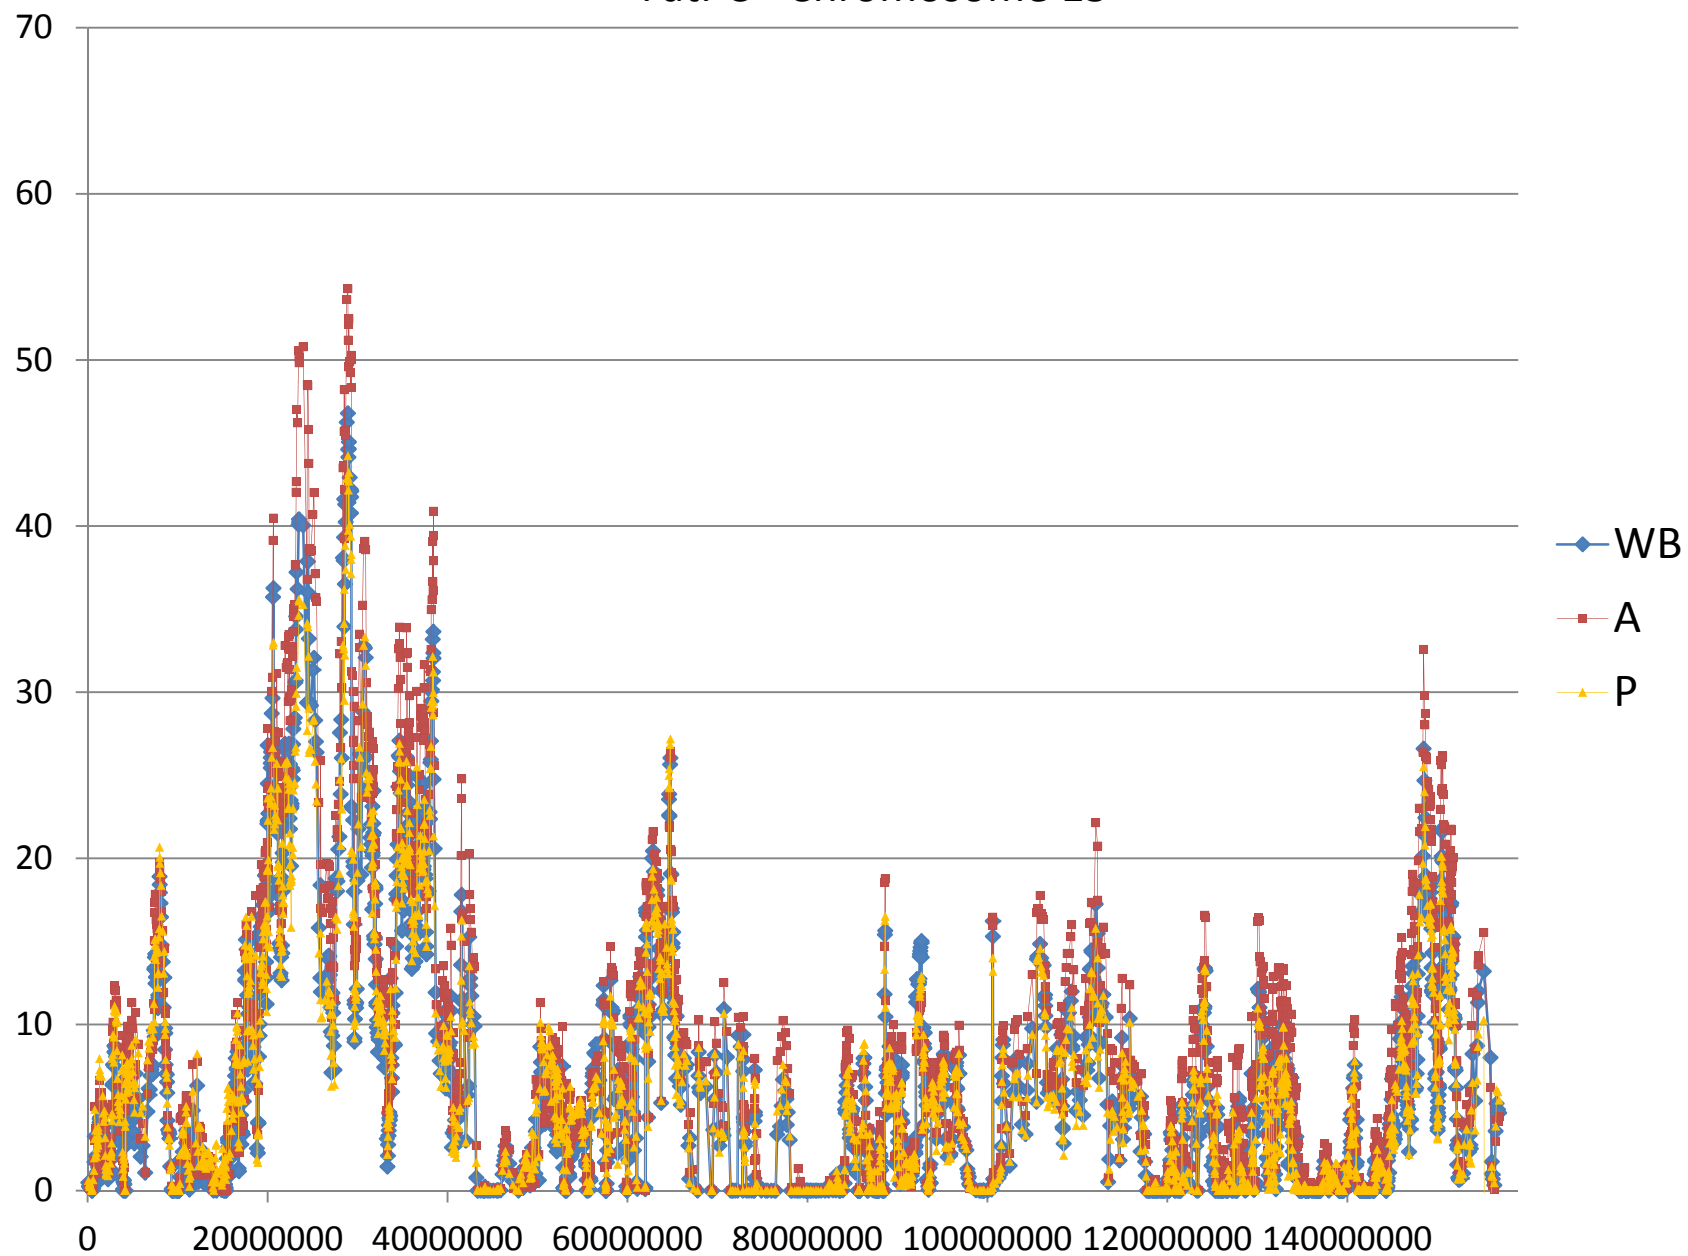

FatPC - Chromosome 16

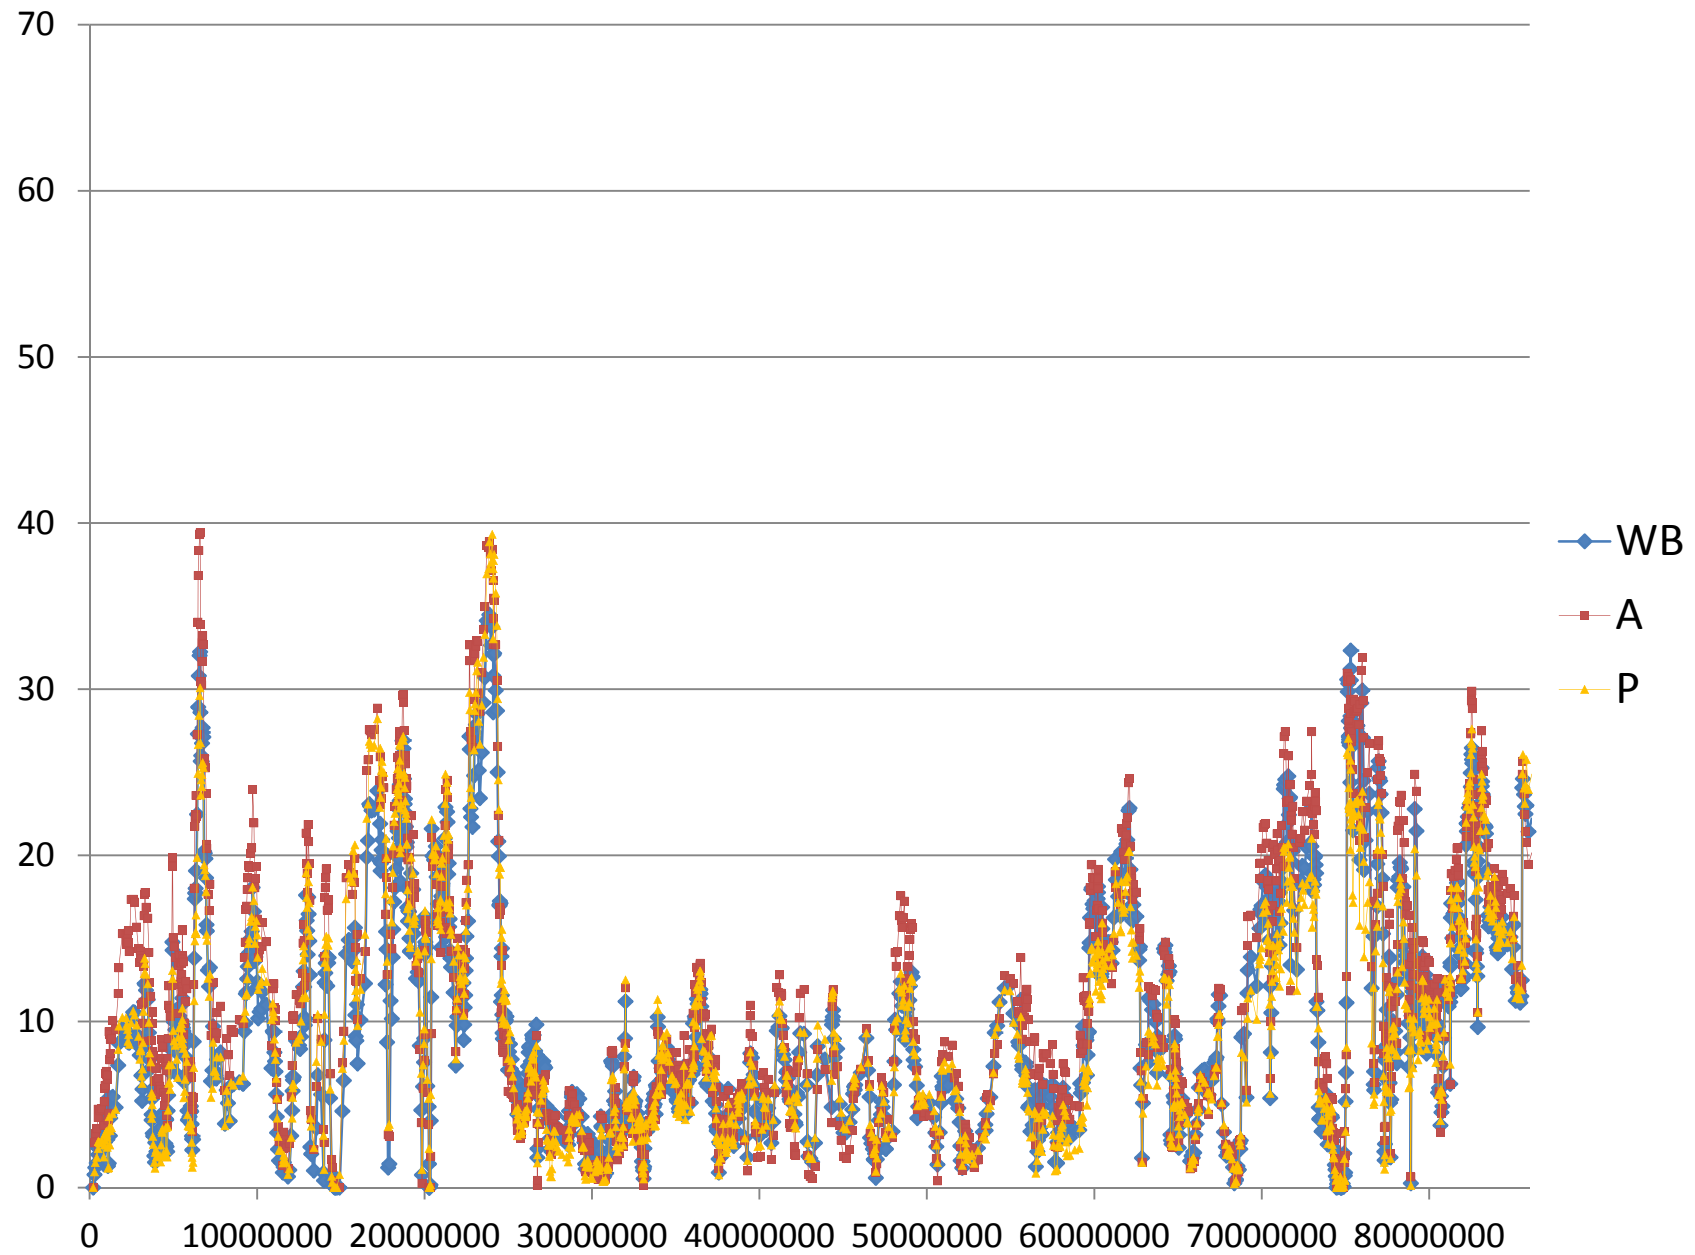



FatPC - Chromosome 17

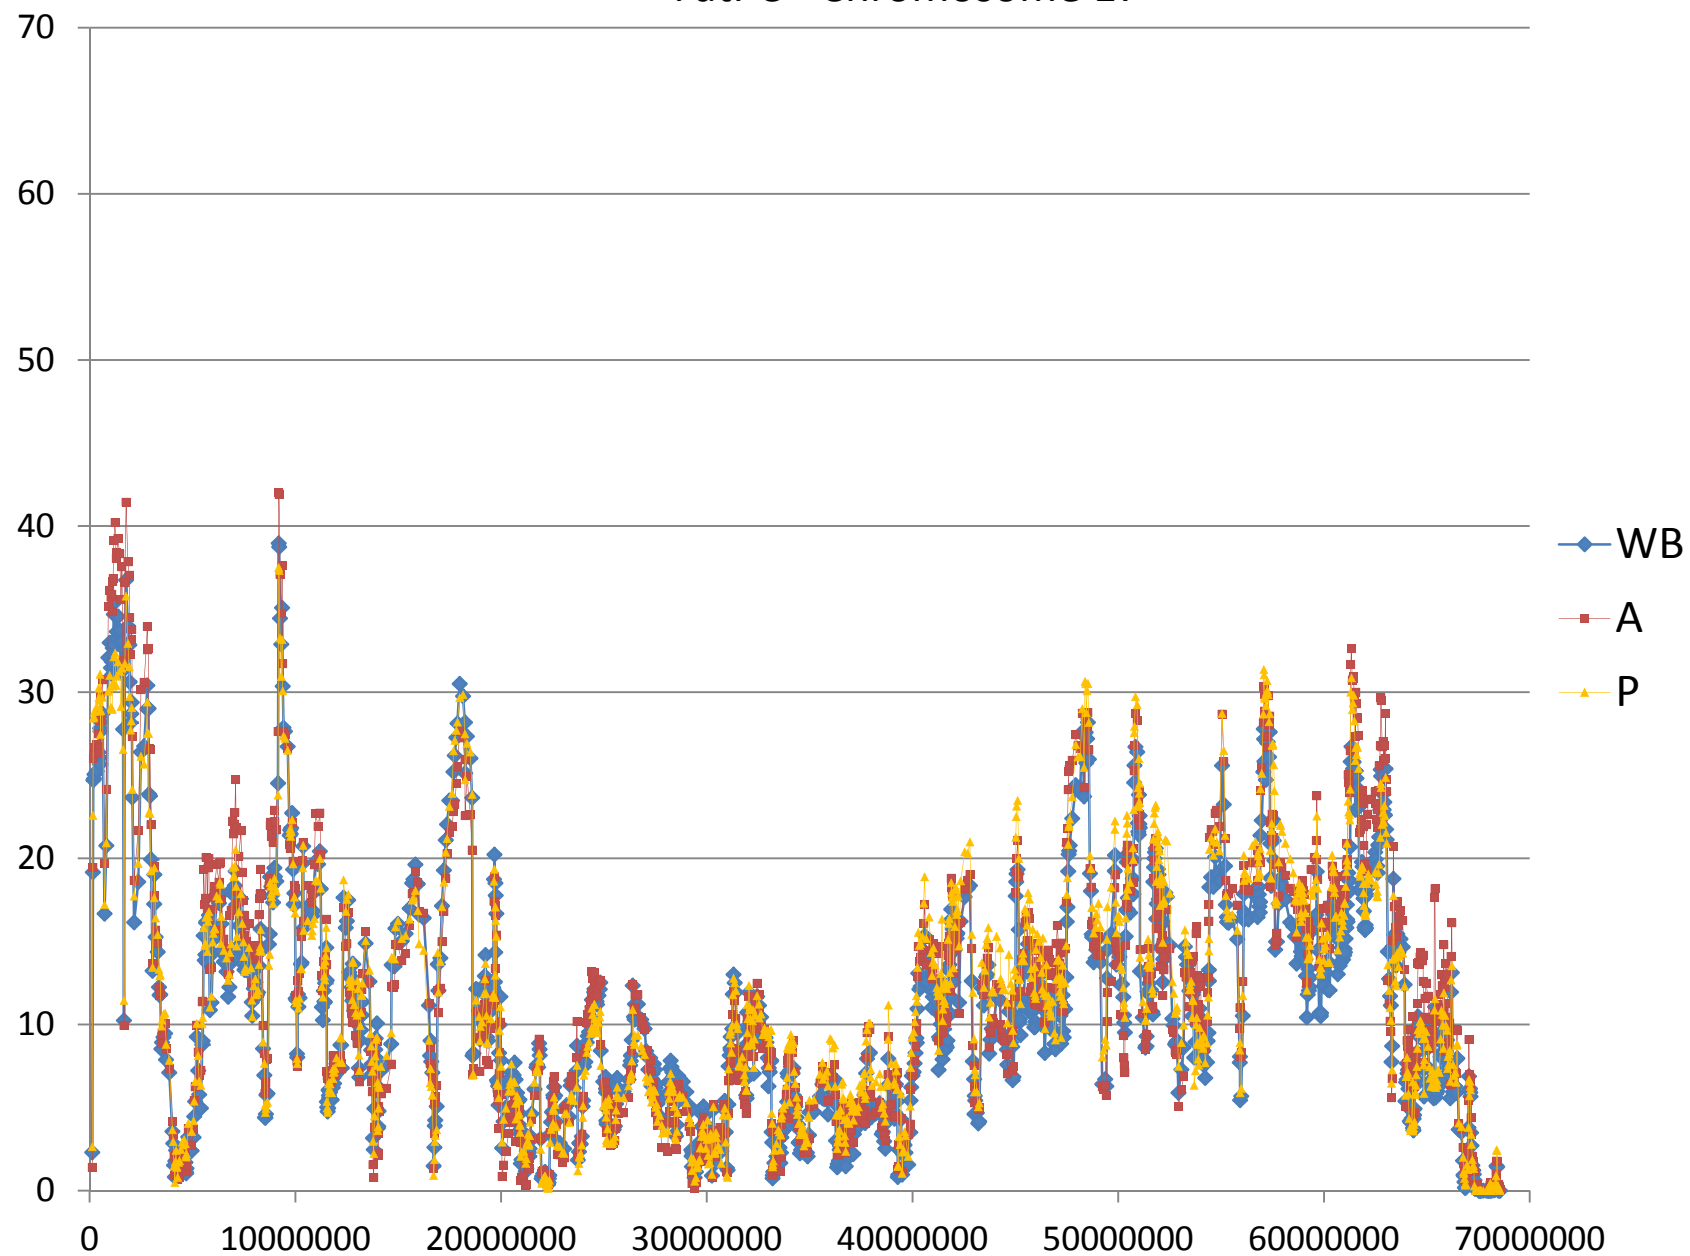

FatPC - Chromosome 18

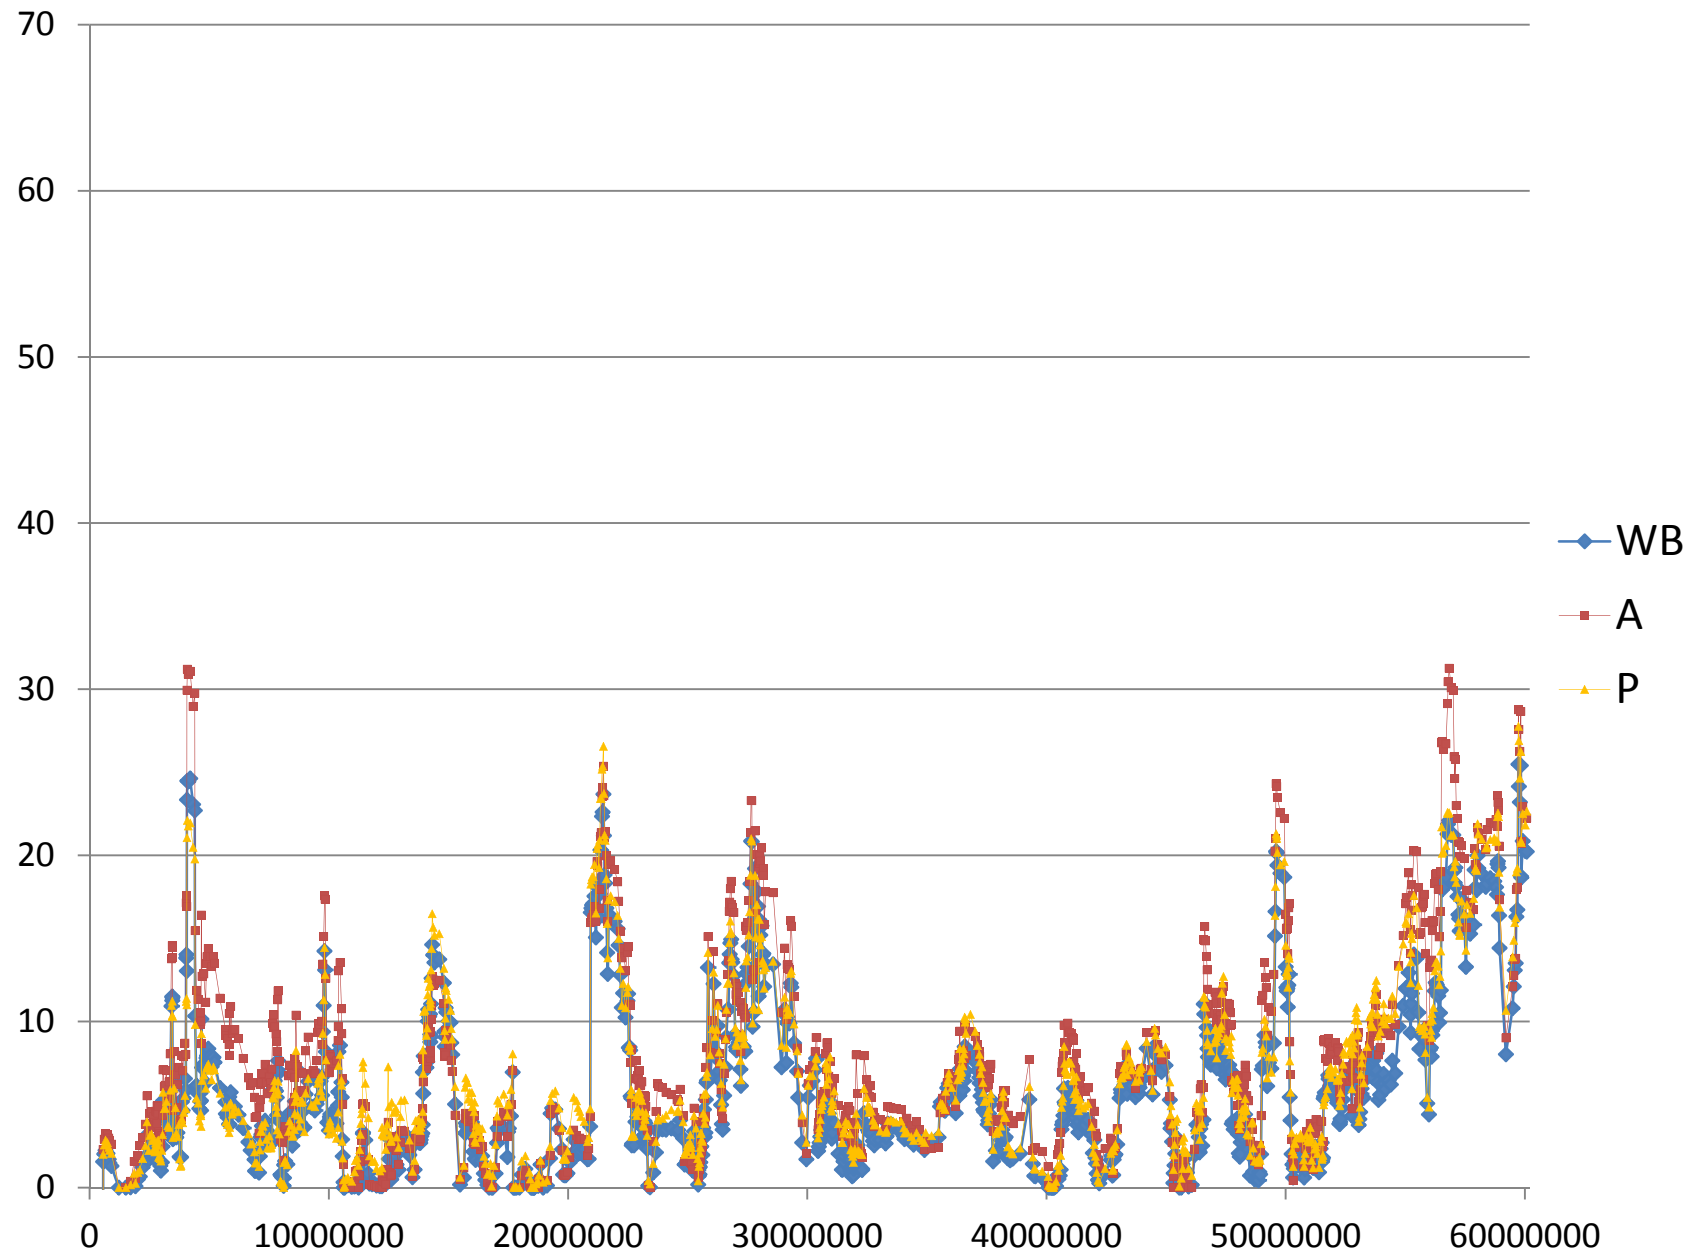

Supplement: Supplementary file 7 [file aab-60-51-2017-supplement.zip]
