# Supplementary material for: Genome-wide QTL mapping results for regional DXA body composition and bone mineral density traits in pigs
Source: Copernicus journal article supplement (doi:10.5194/aab-60-51-2017), 2017-04-05

# BMC - Chromosome 1

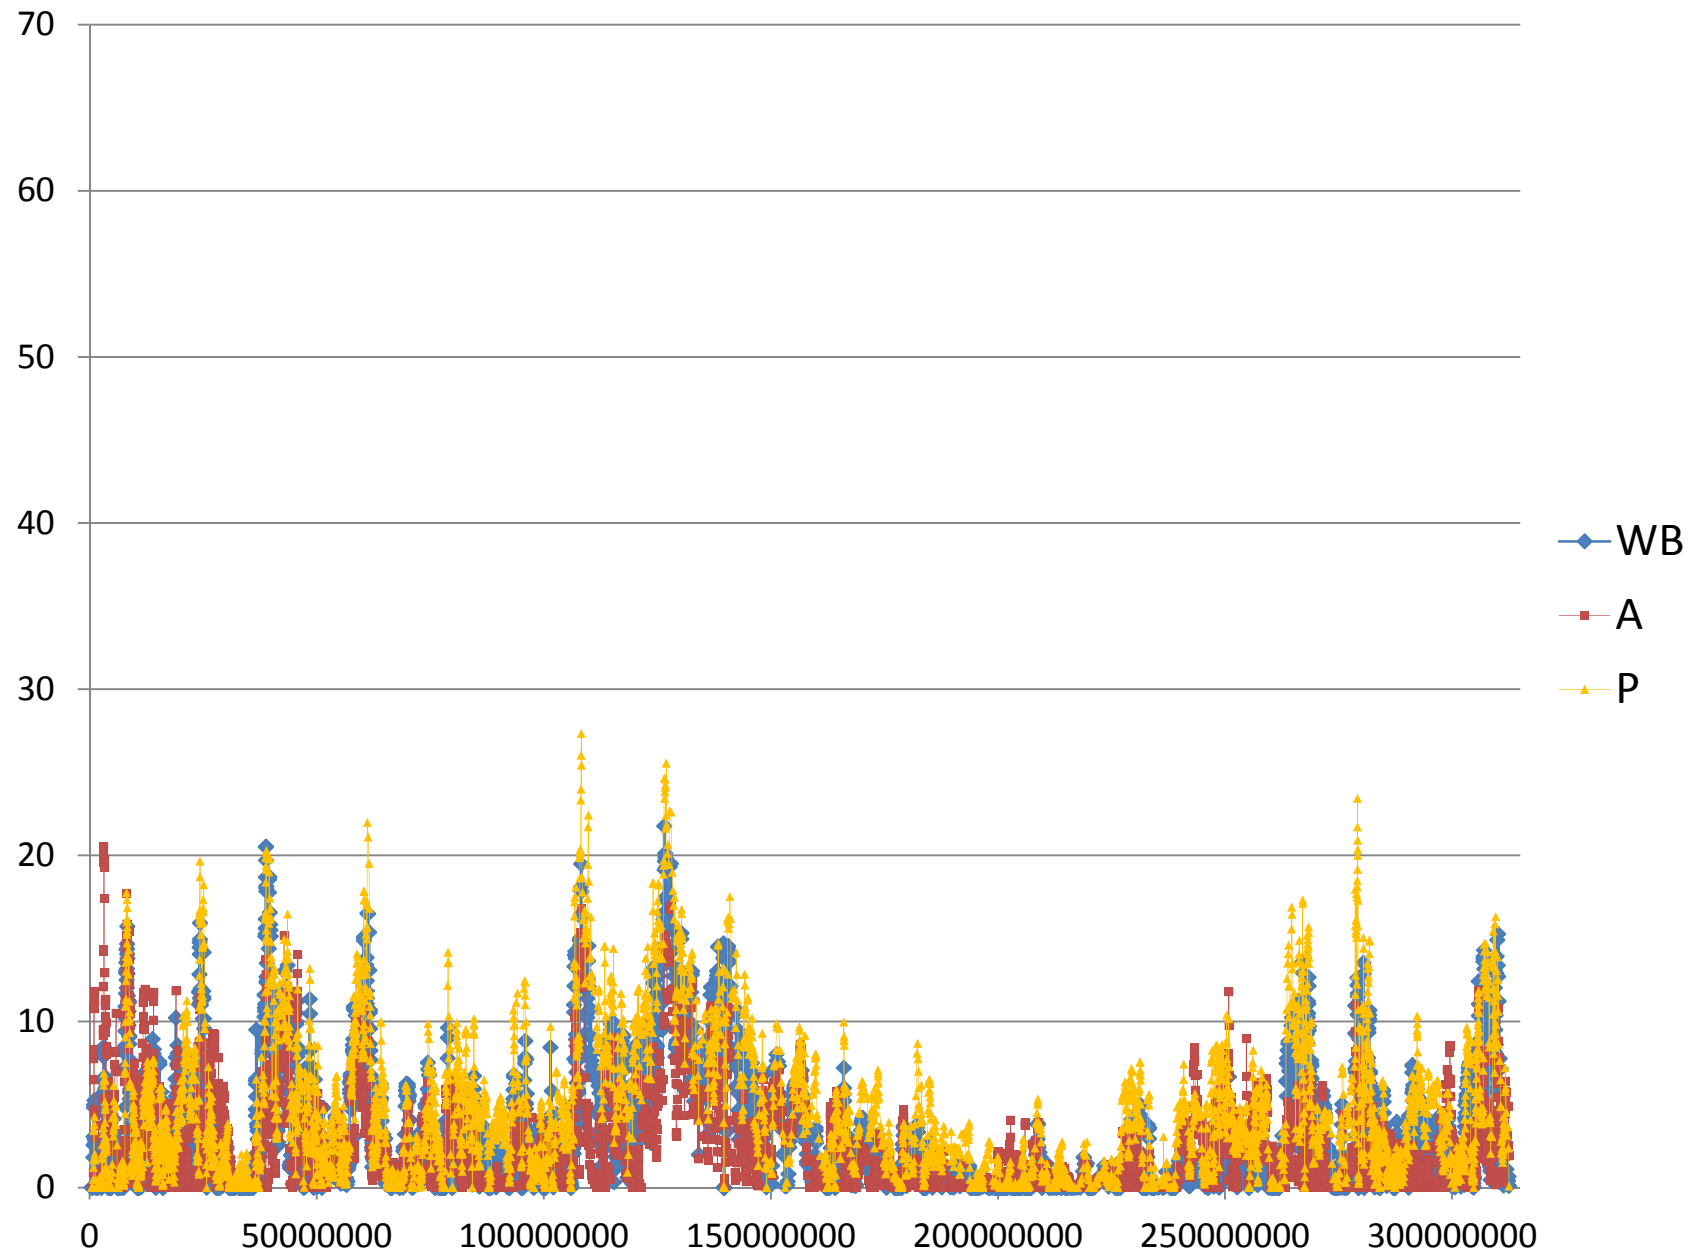

# BMC - Chromosome 2

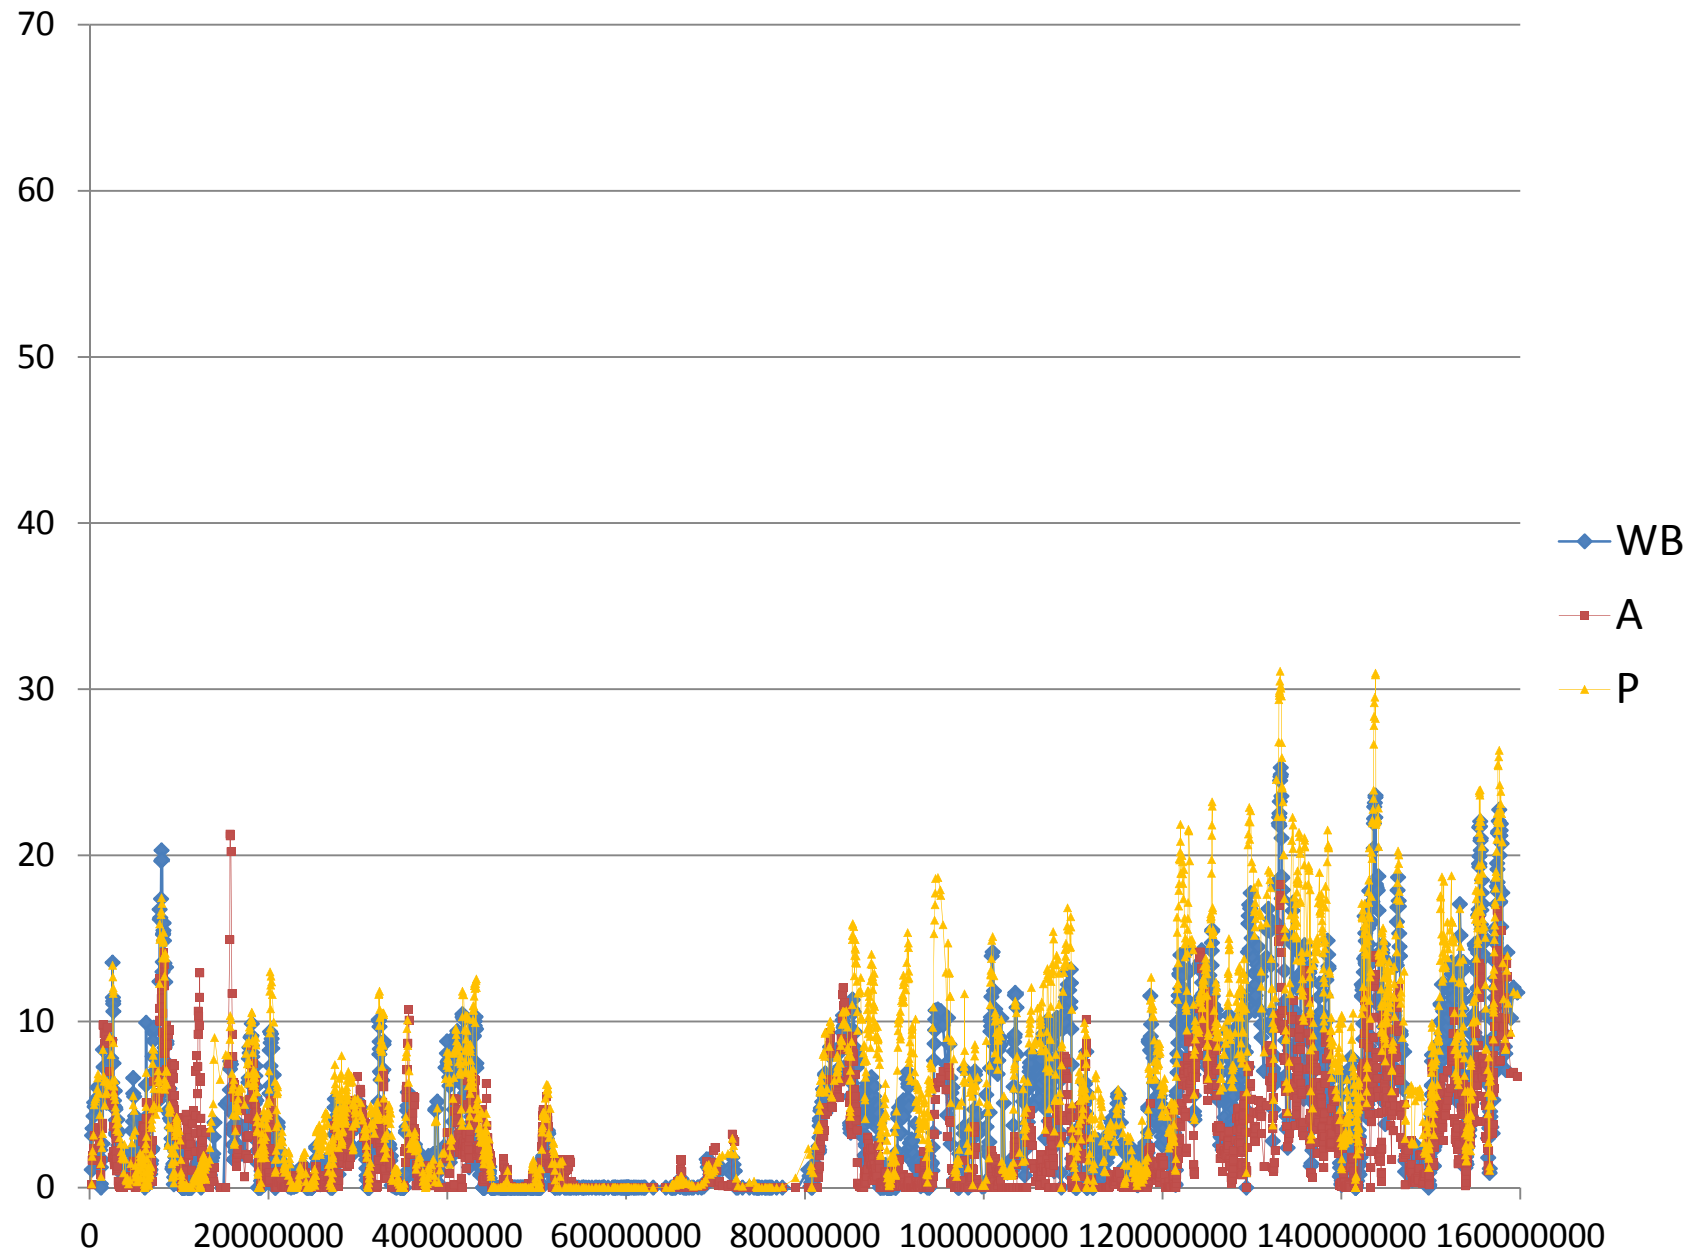

# BMC - Chromosome 3

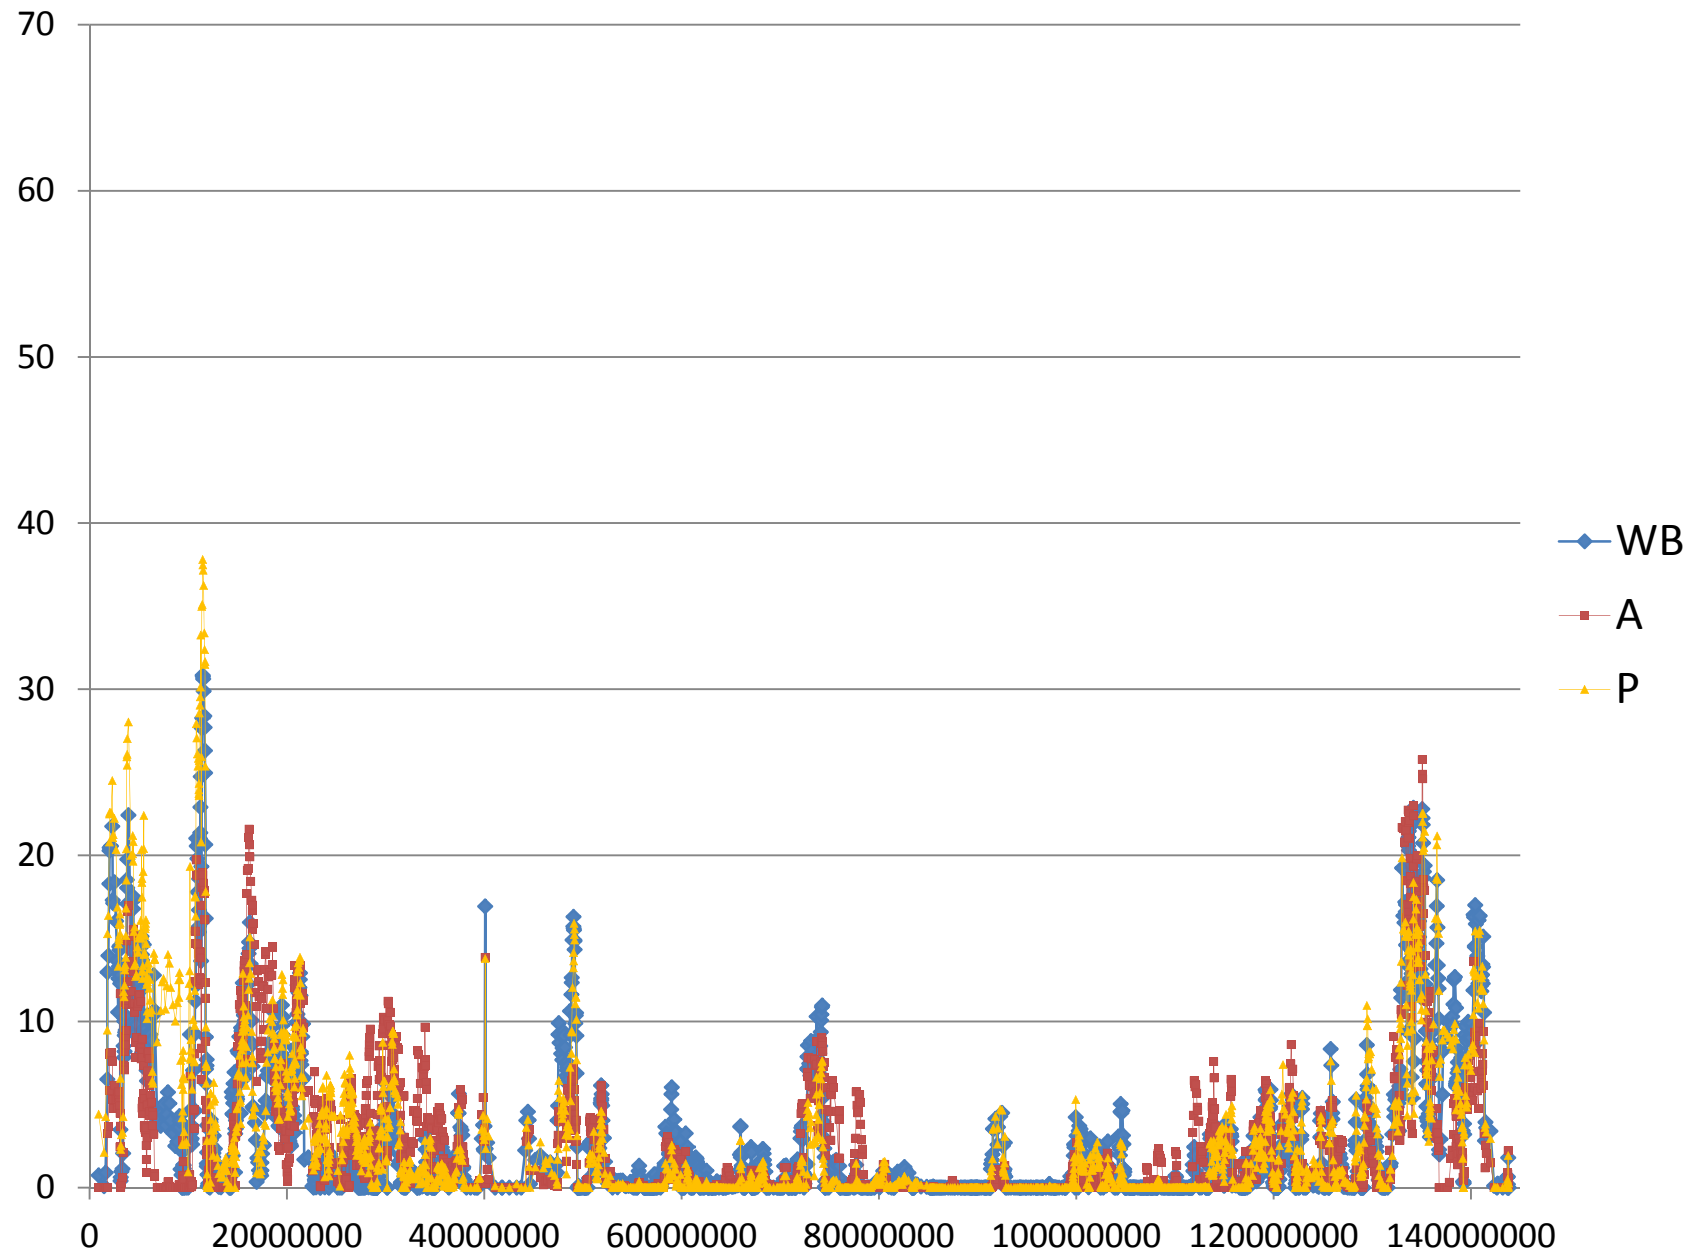

# BMC - Chromosome 4

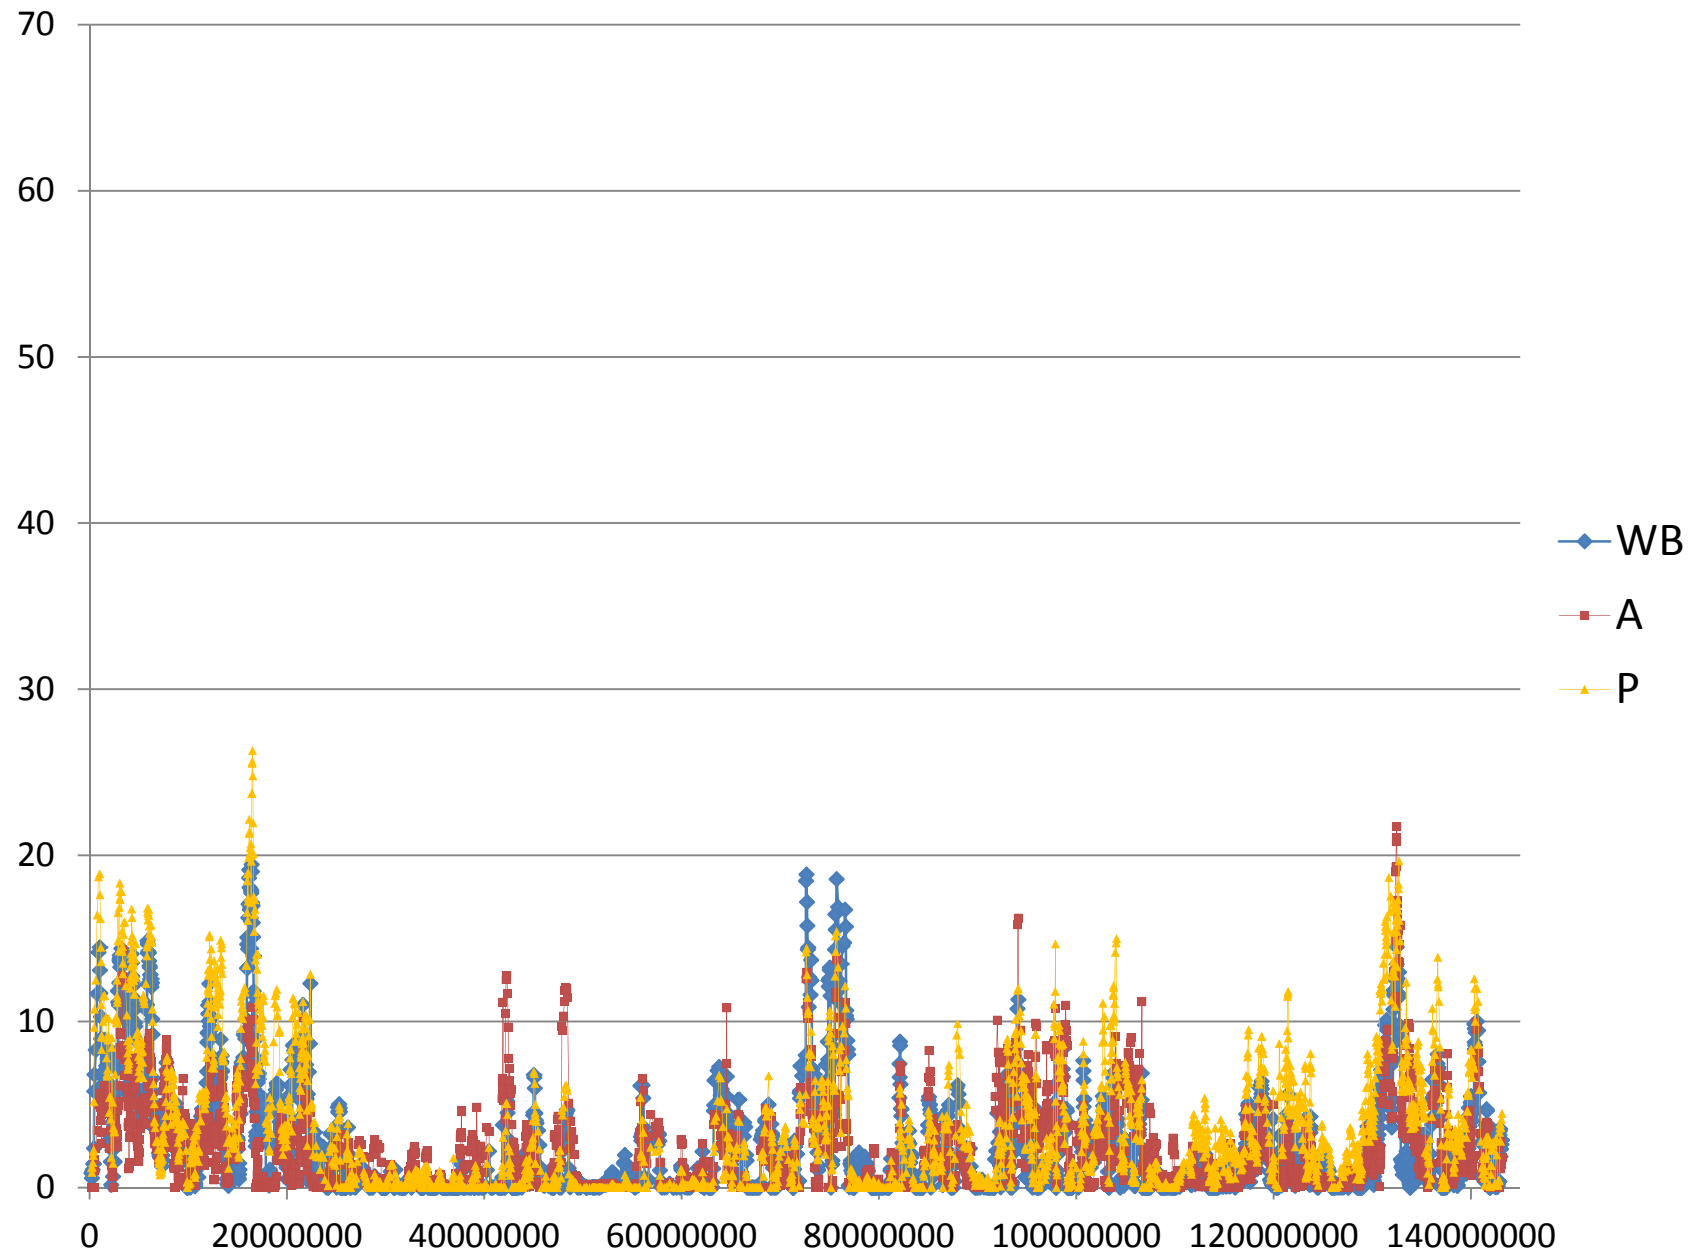

# BMC - Chromosome 5

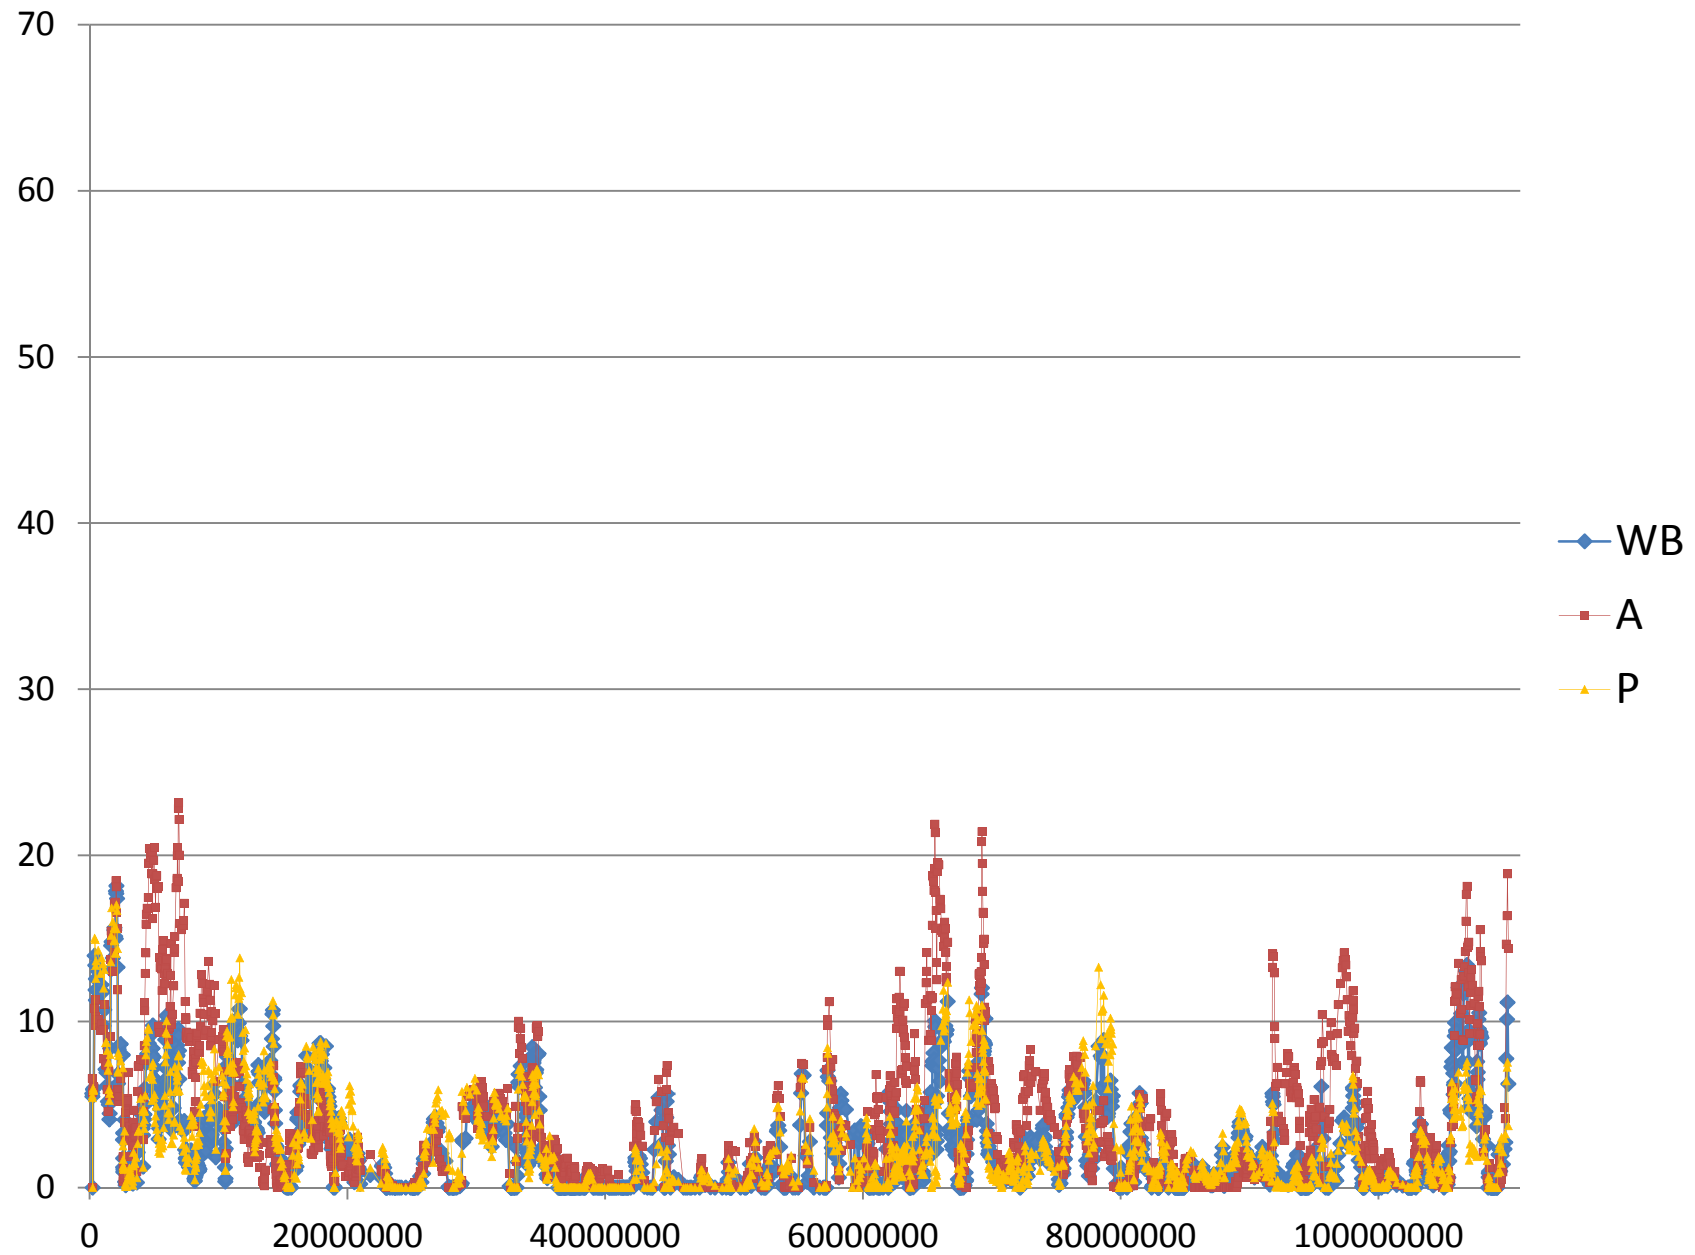

BMC - Chromosome 6

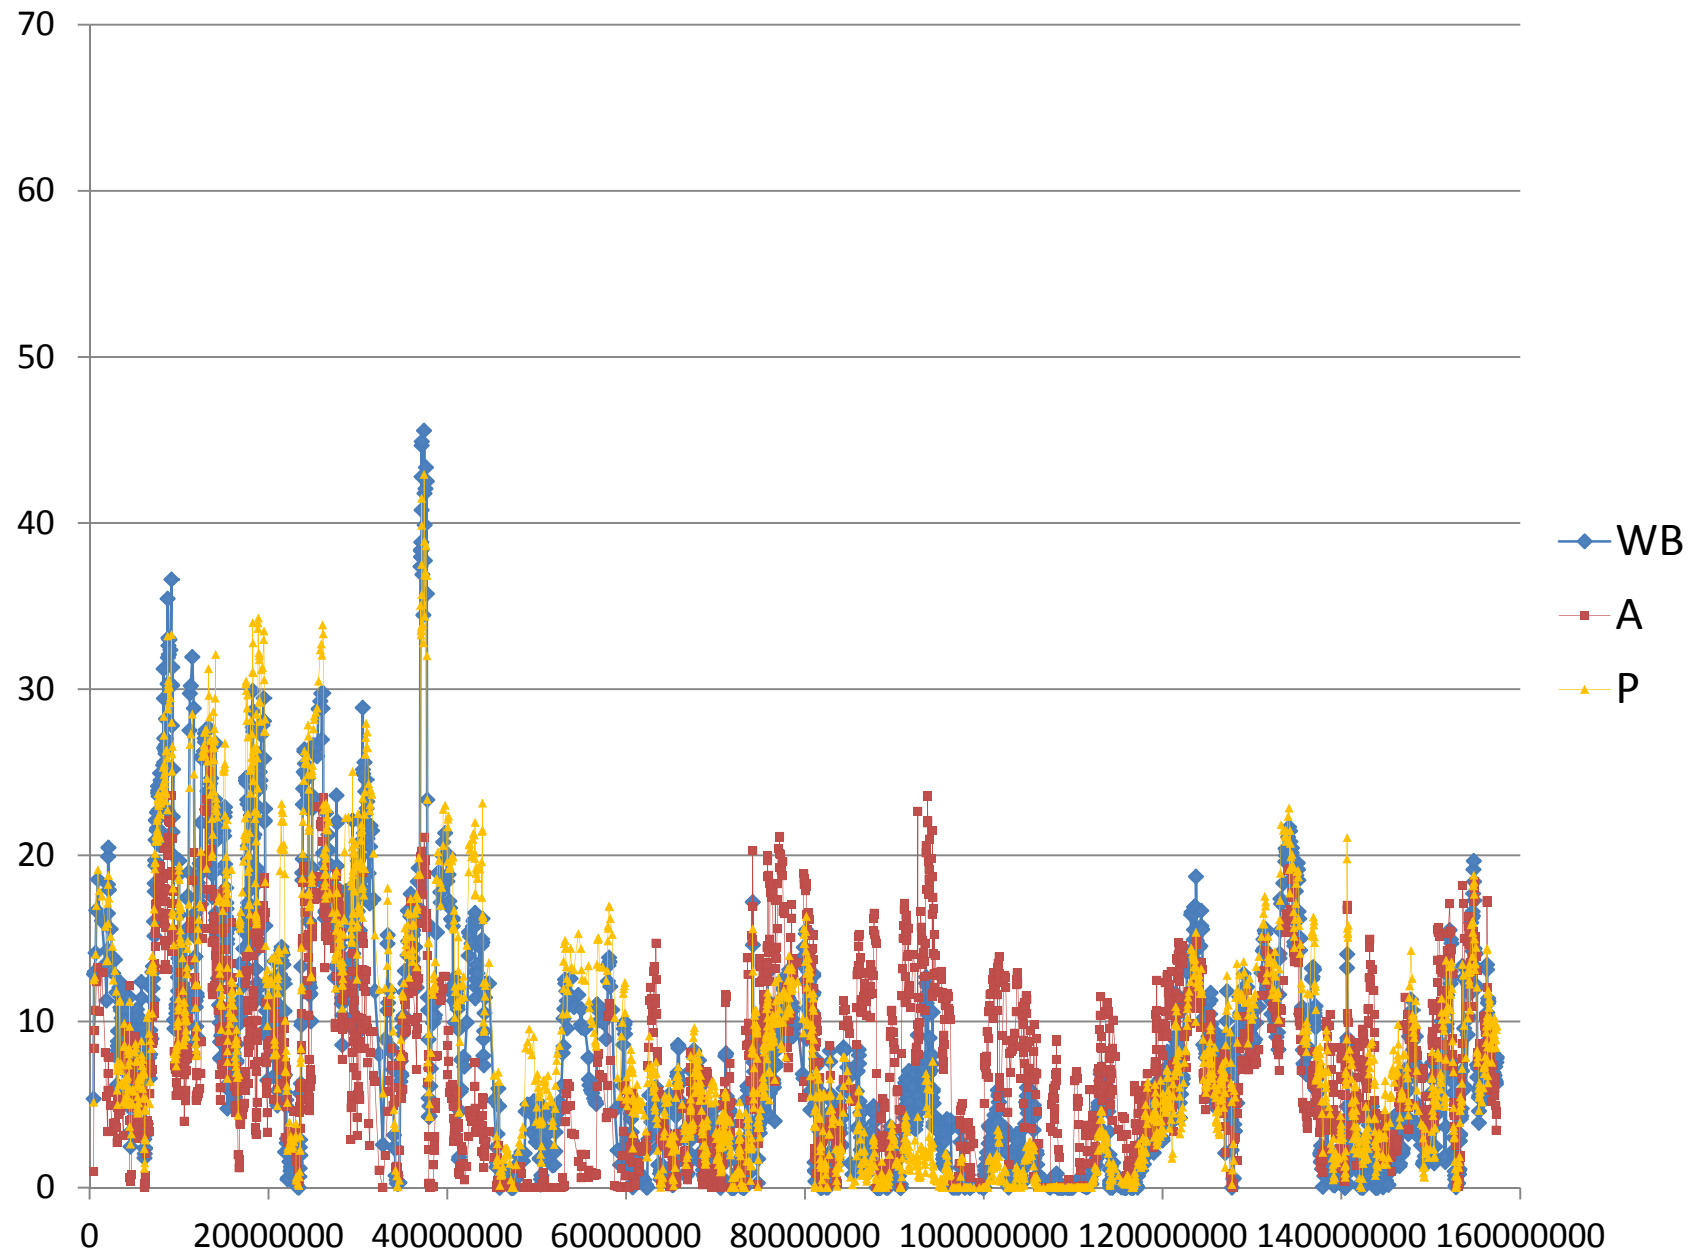

# BMC - Chromosome 7

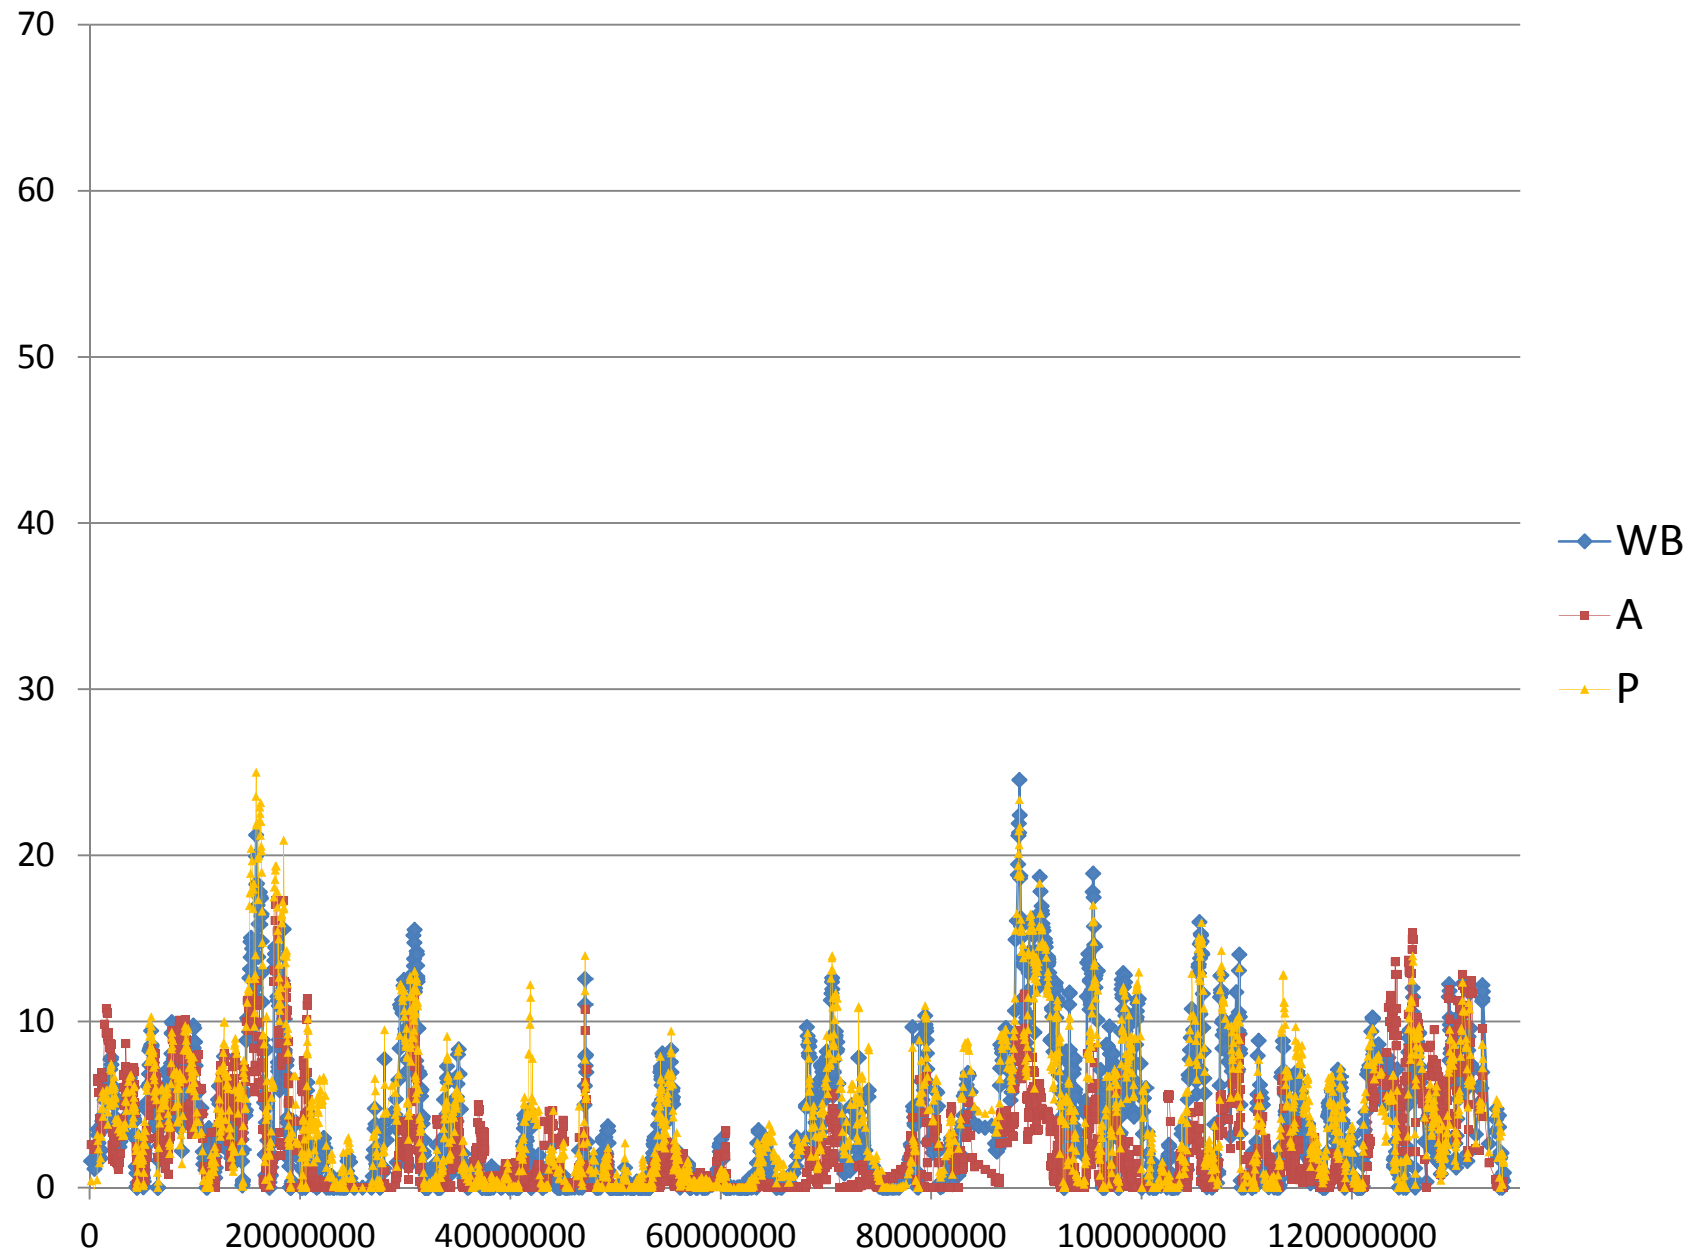

# BMC - Chromosome 8

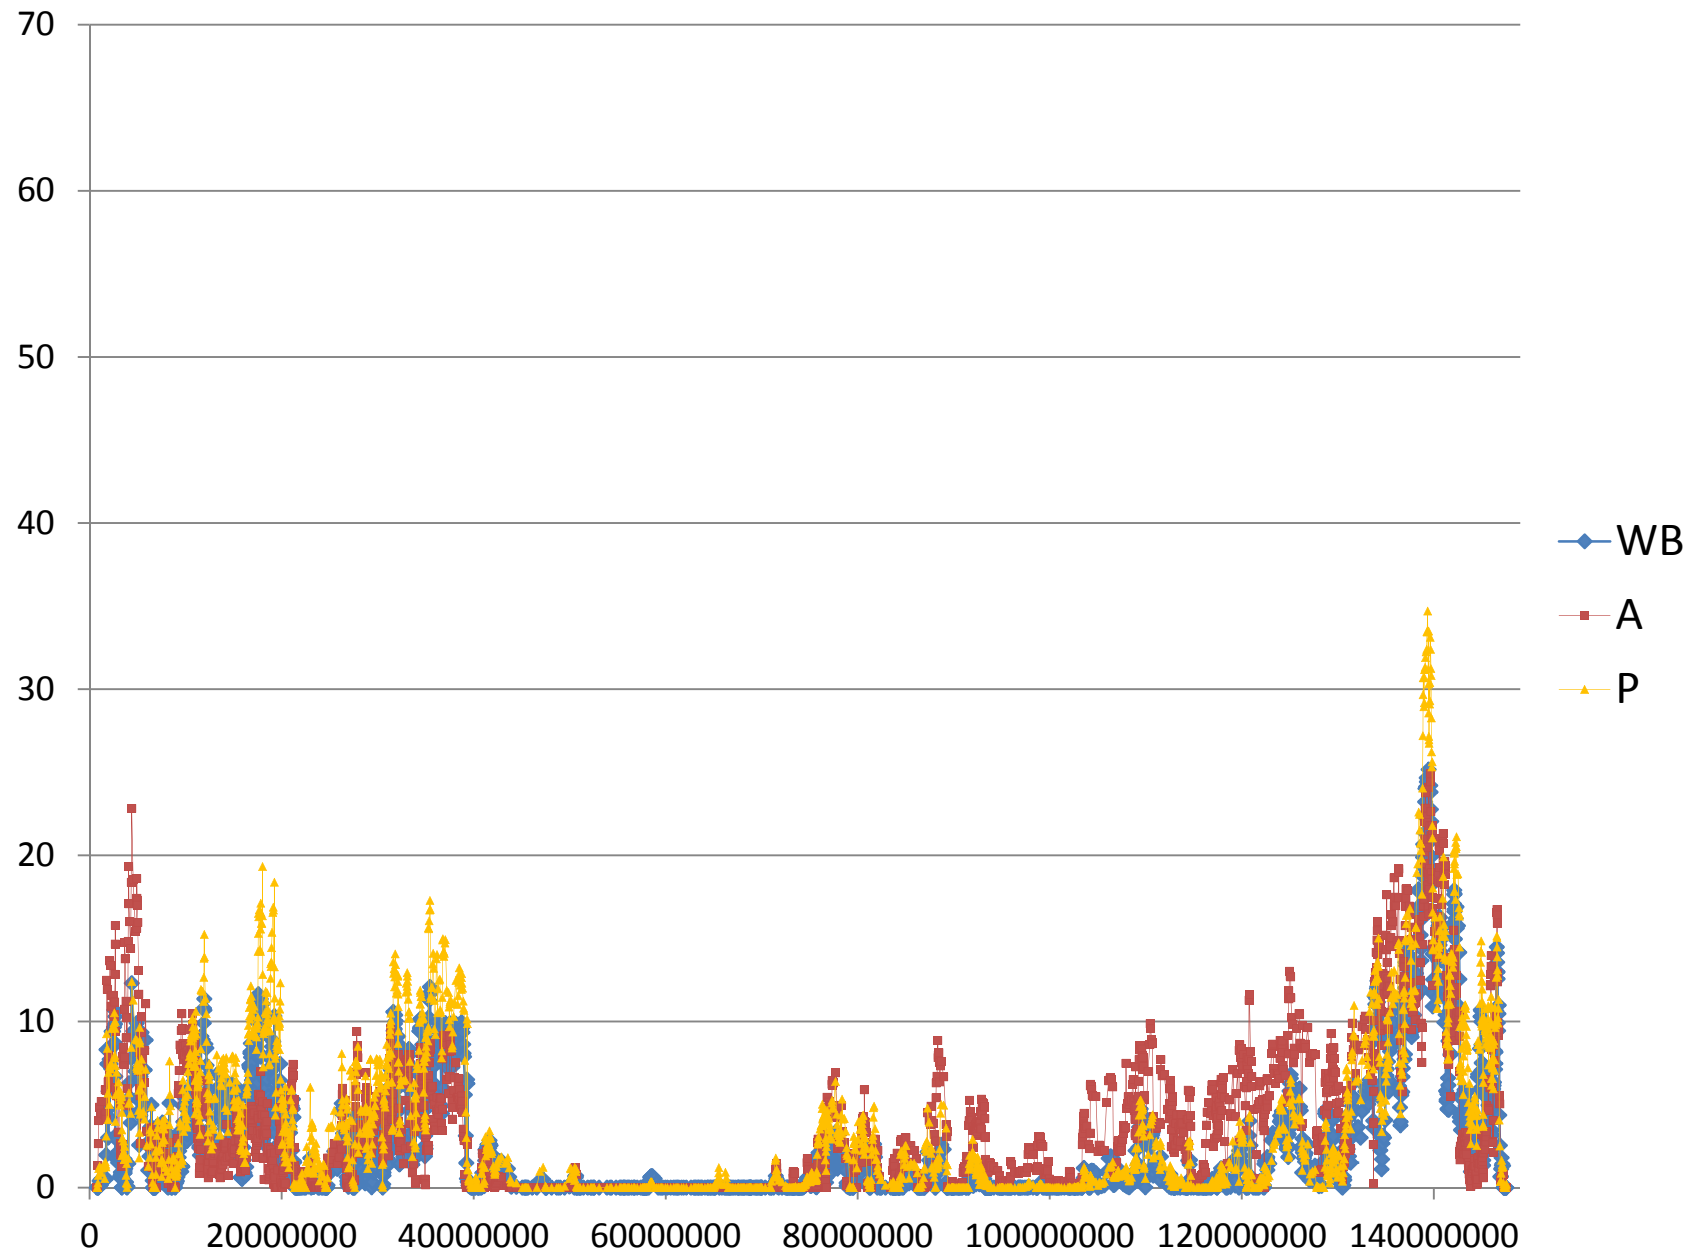



# BMC - Chromosome 9

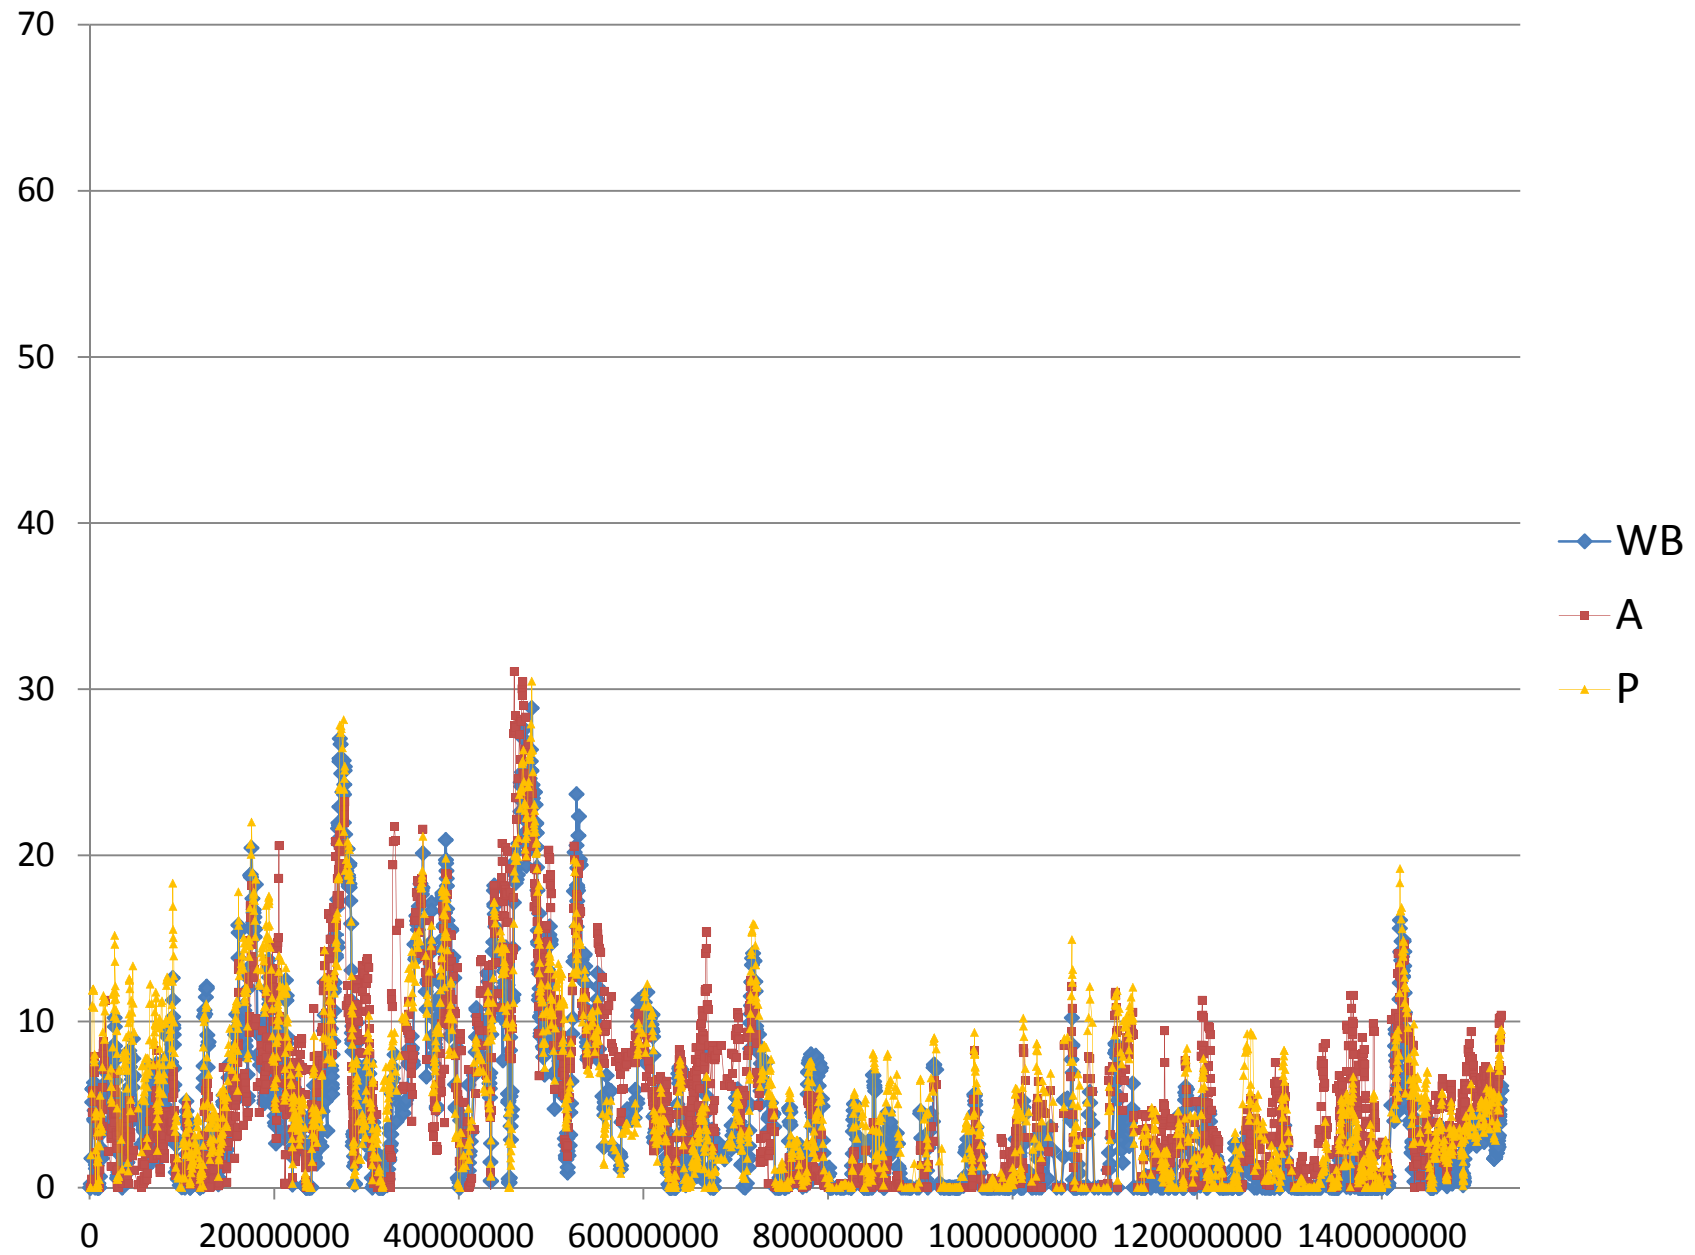

# BMC - Chromosome 10

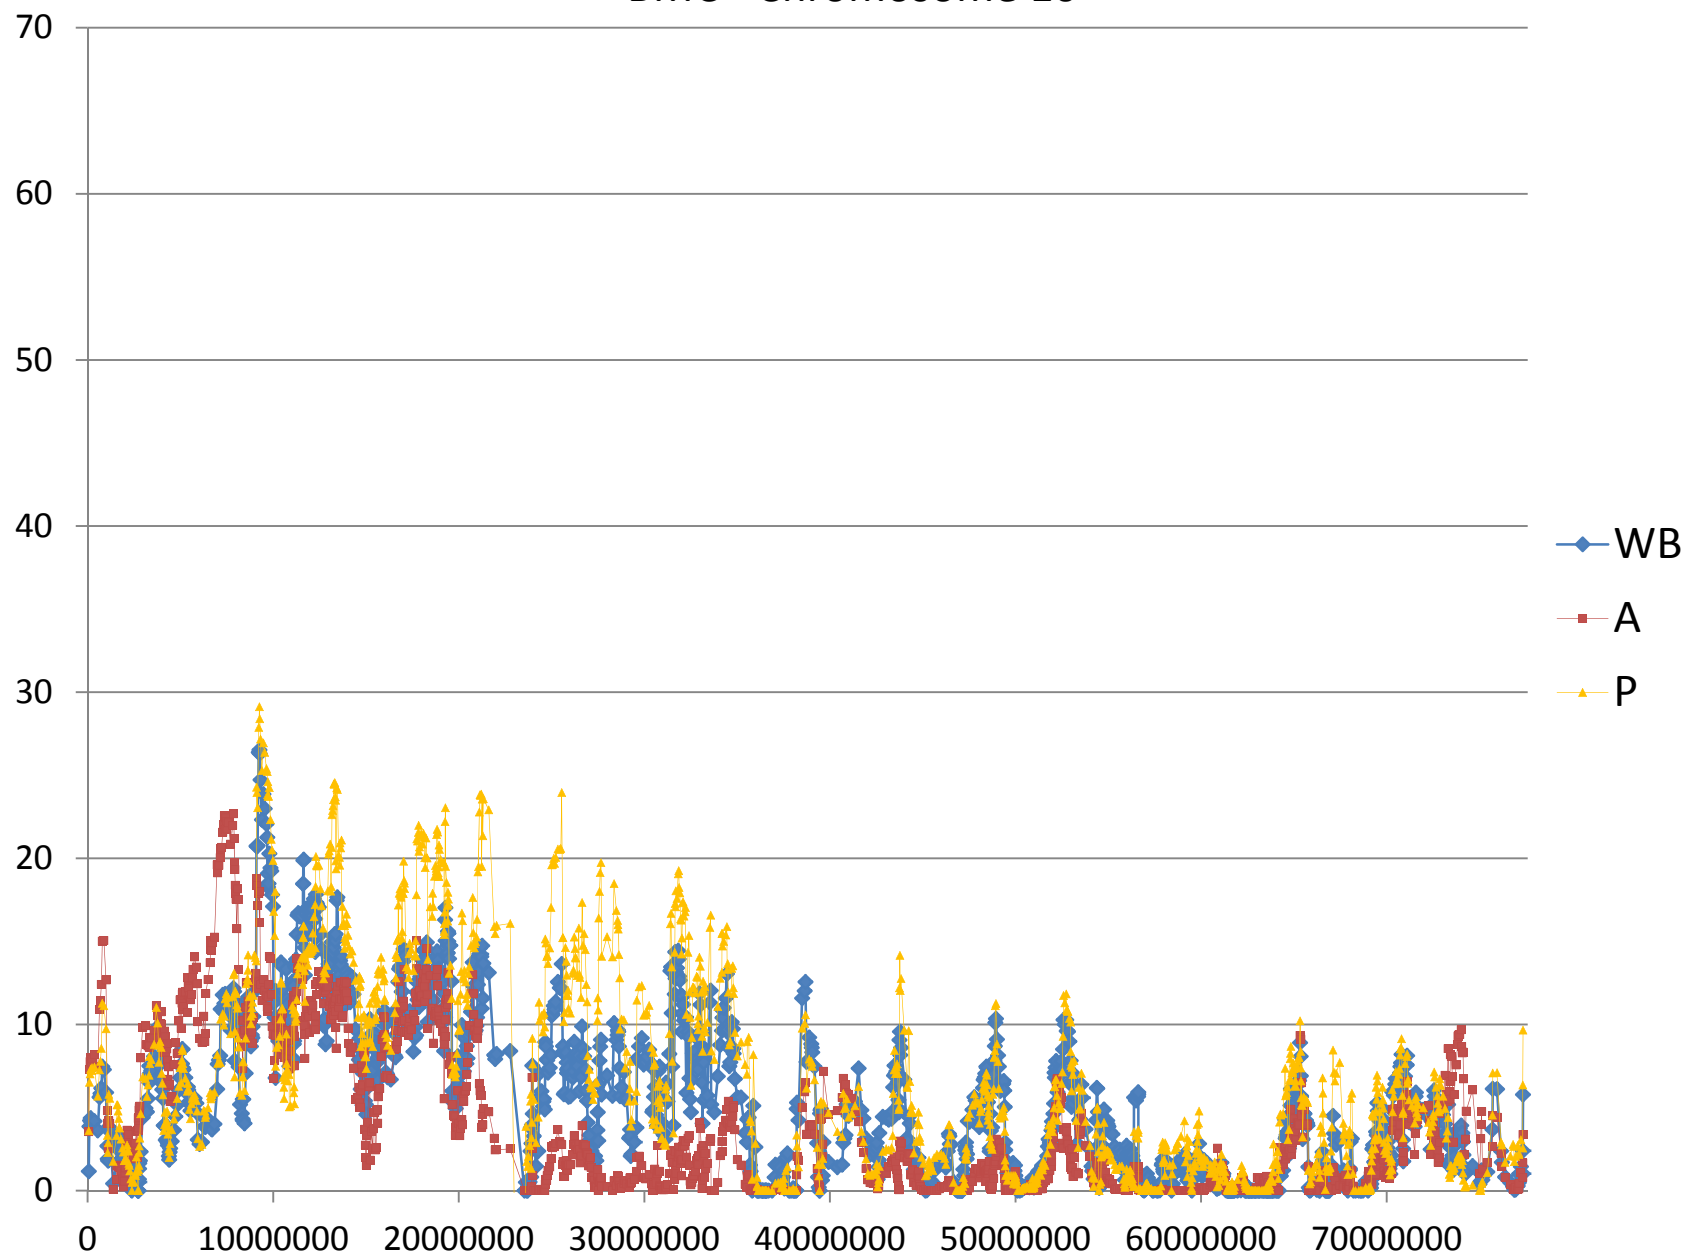

# BMC - Chromosome 11

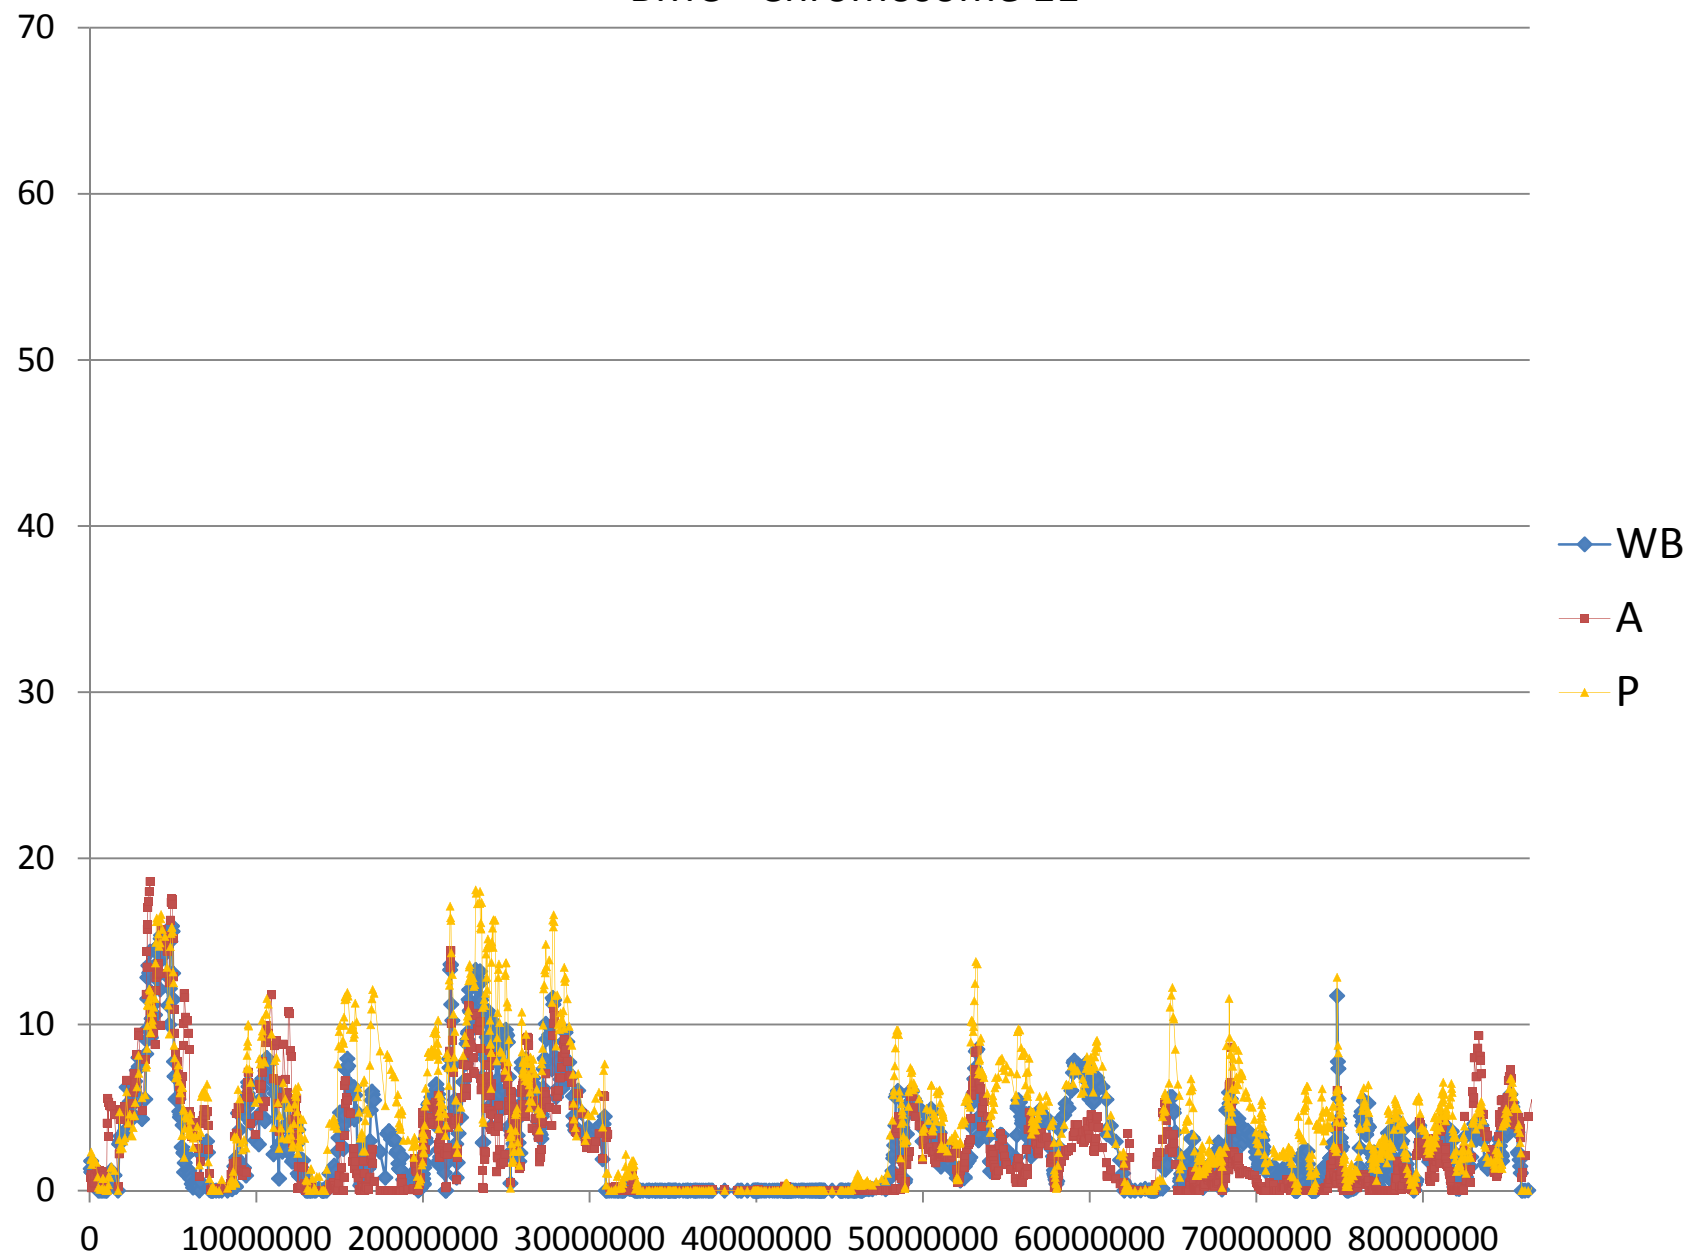

# BMC - Chromosome 12

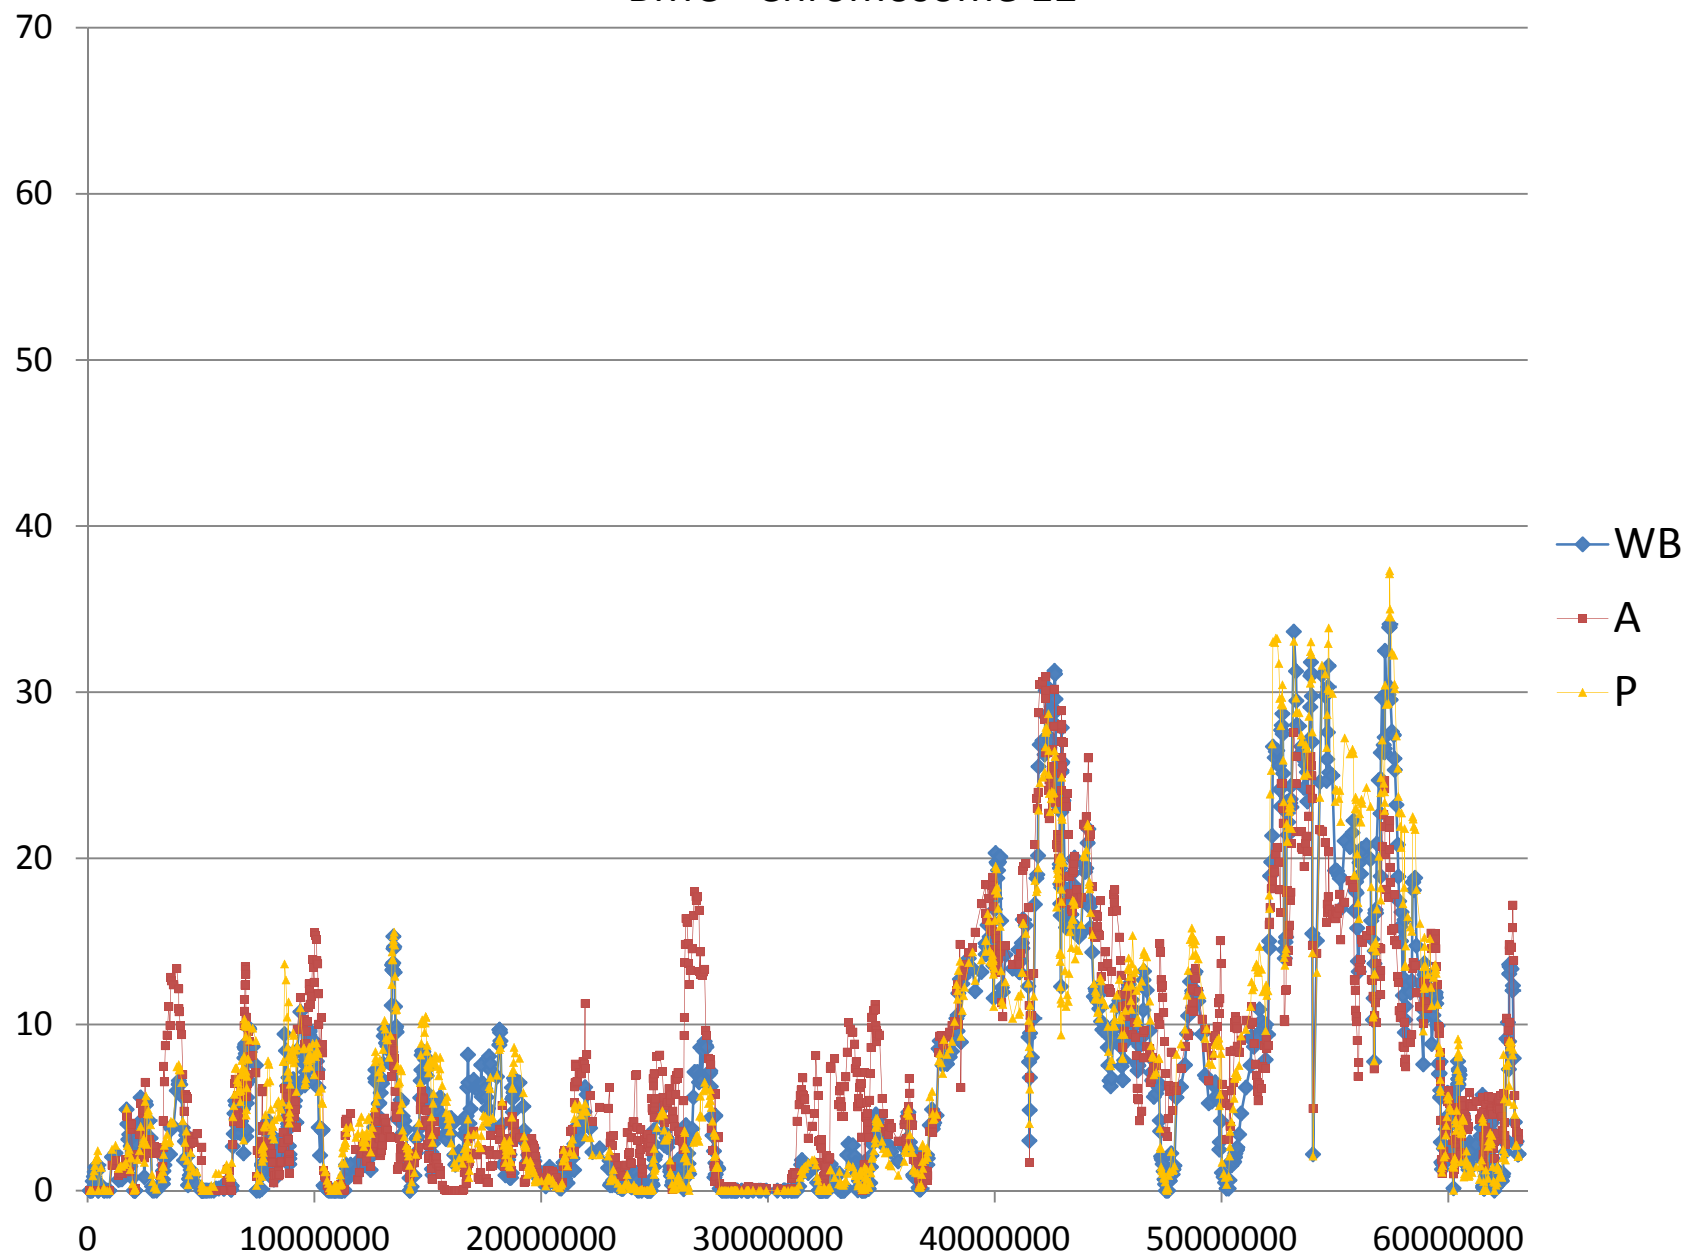

# BMC - Chromosome 13

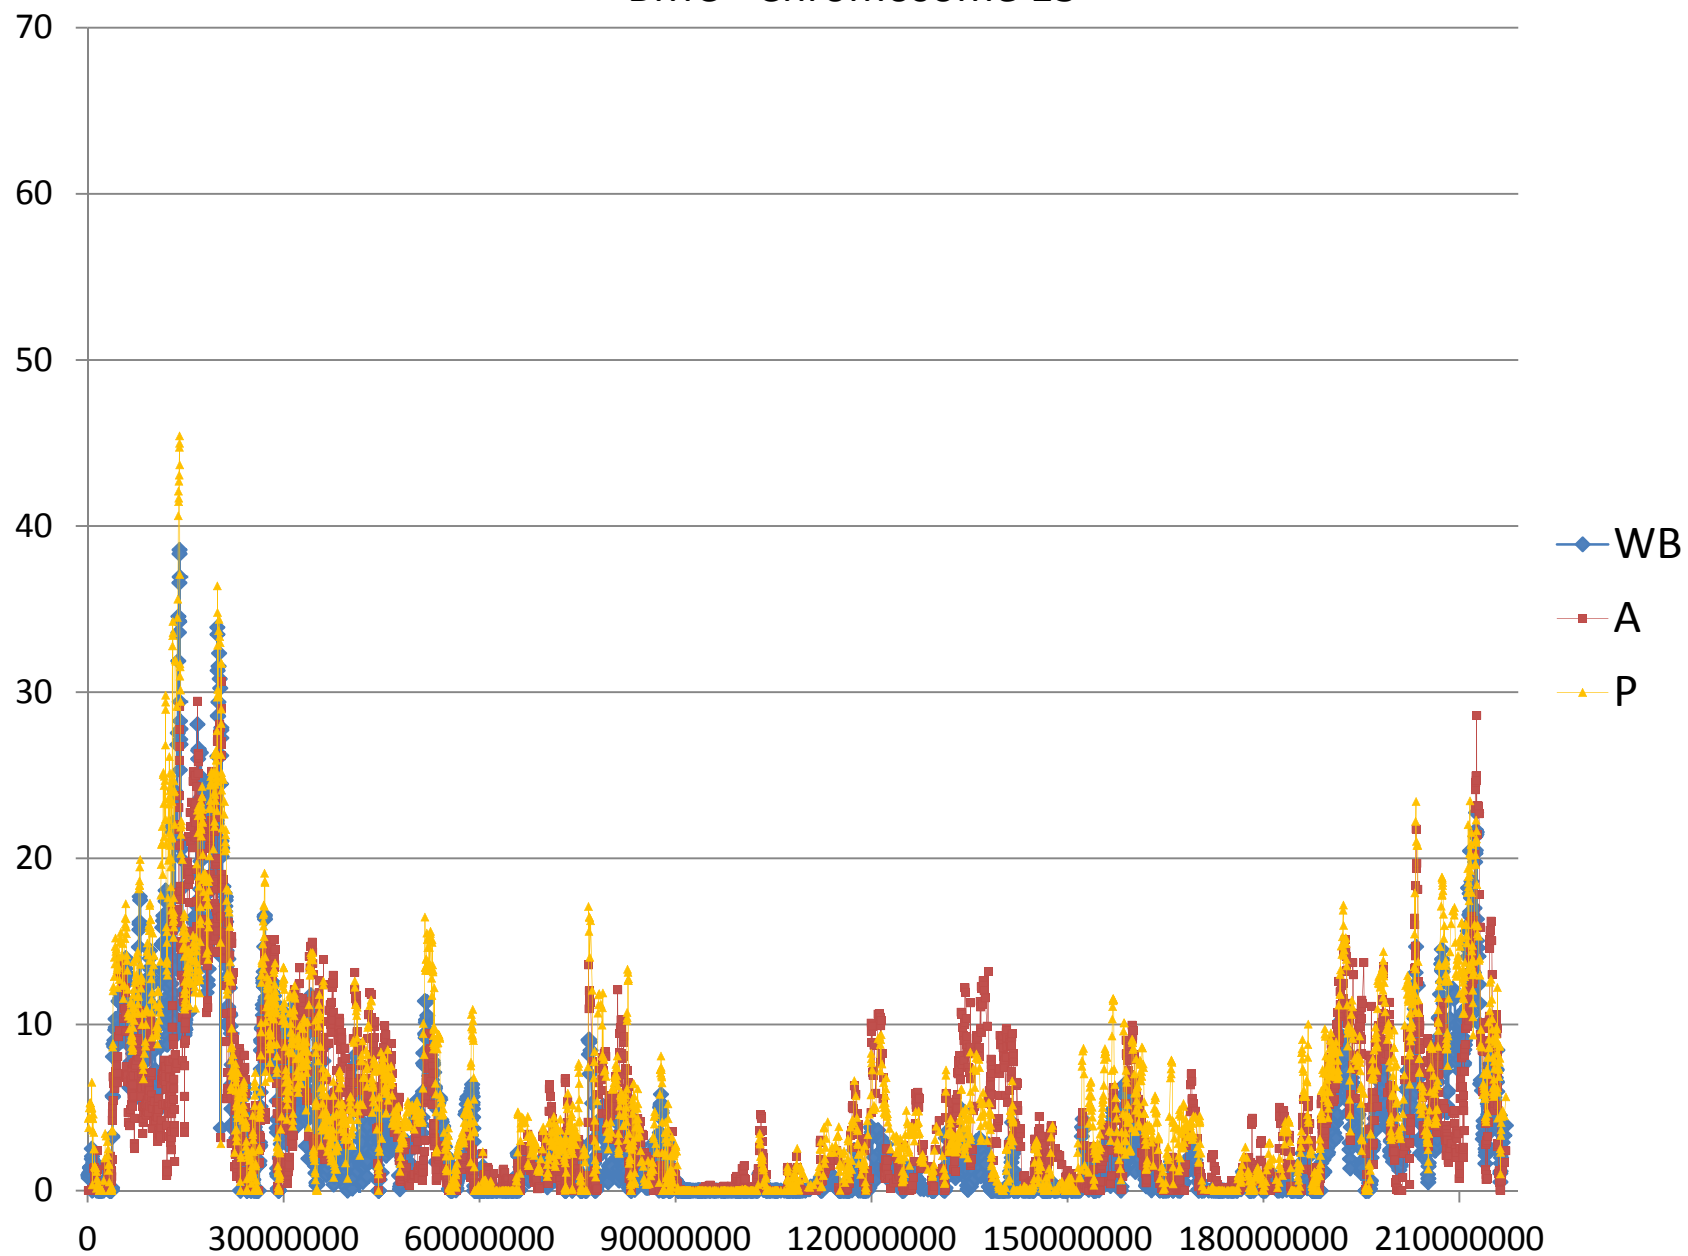

# BMC - Chromosome 14

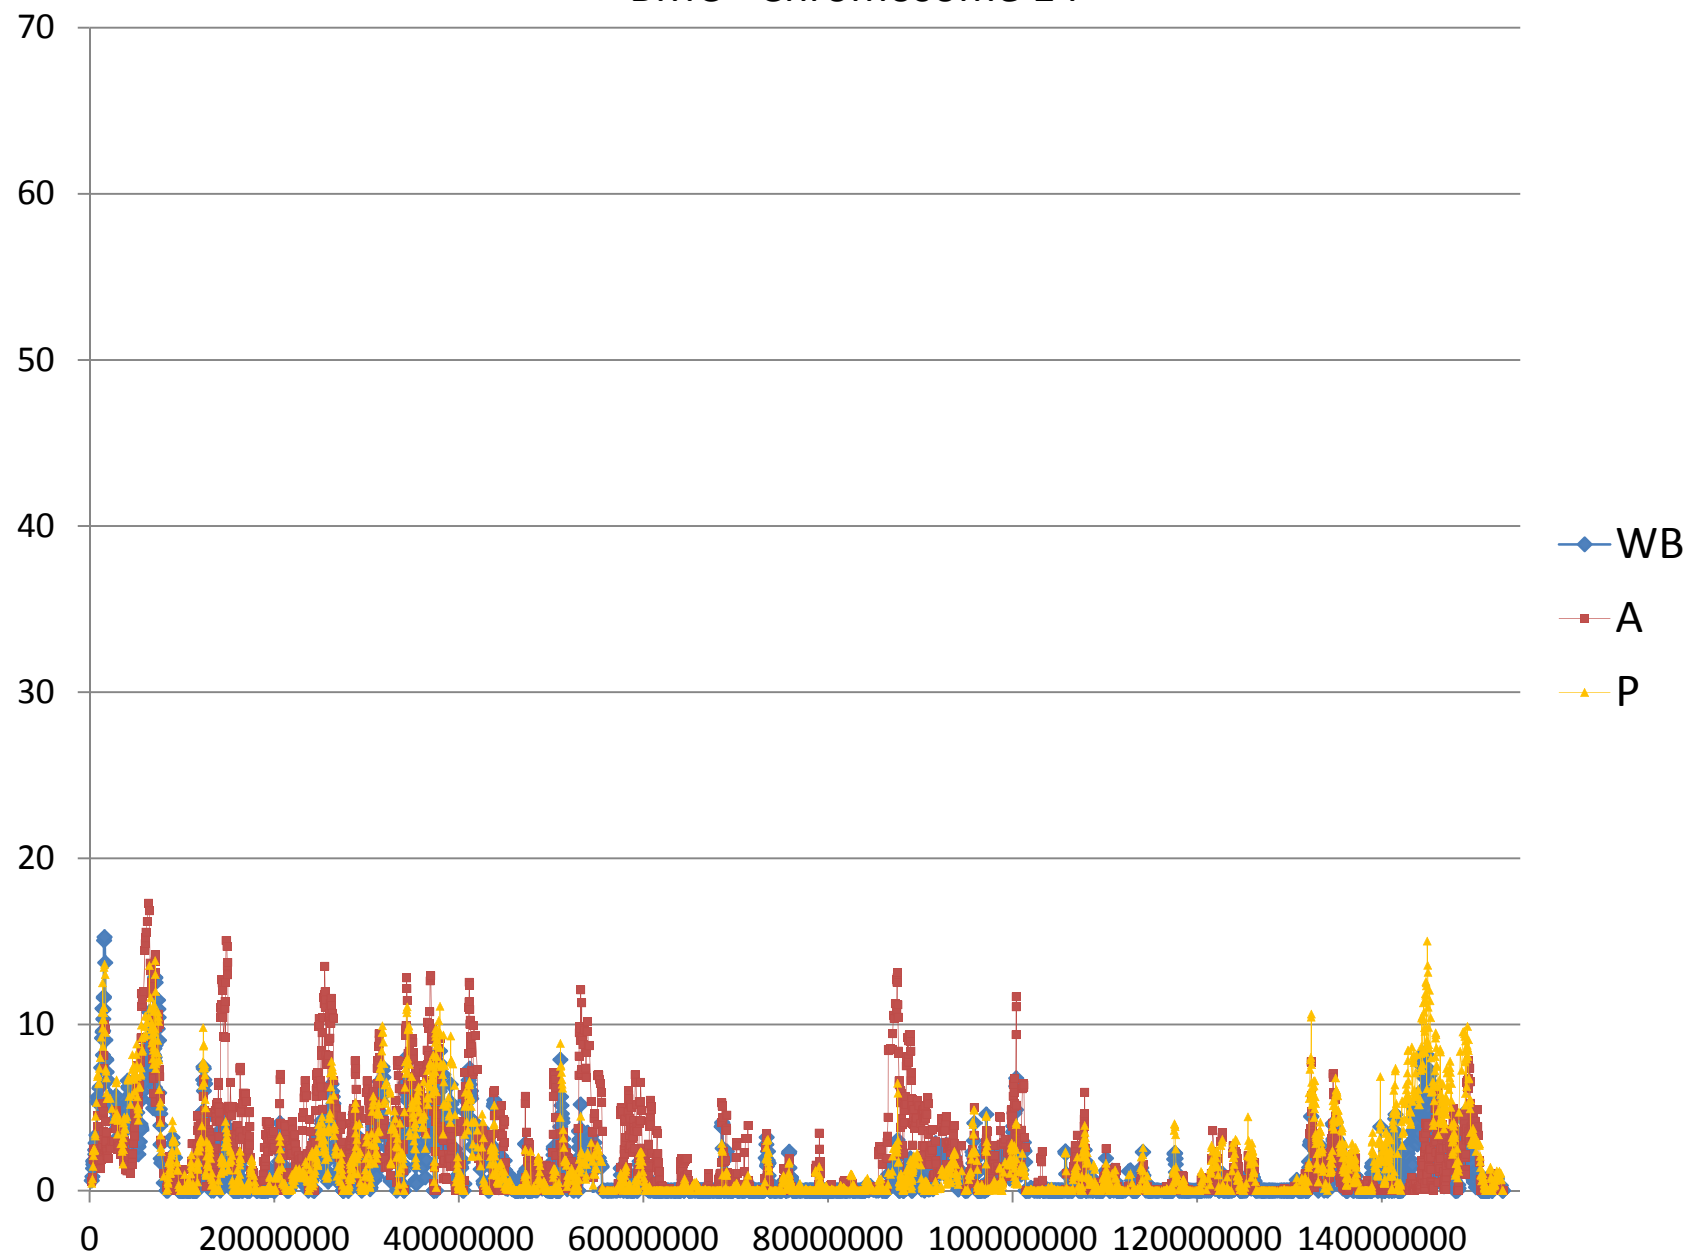

# BMC - Chromosome 15

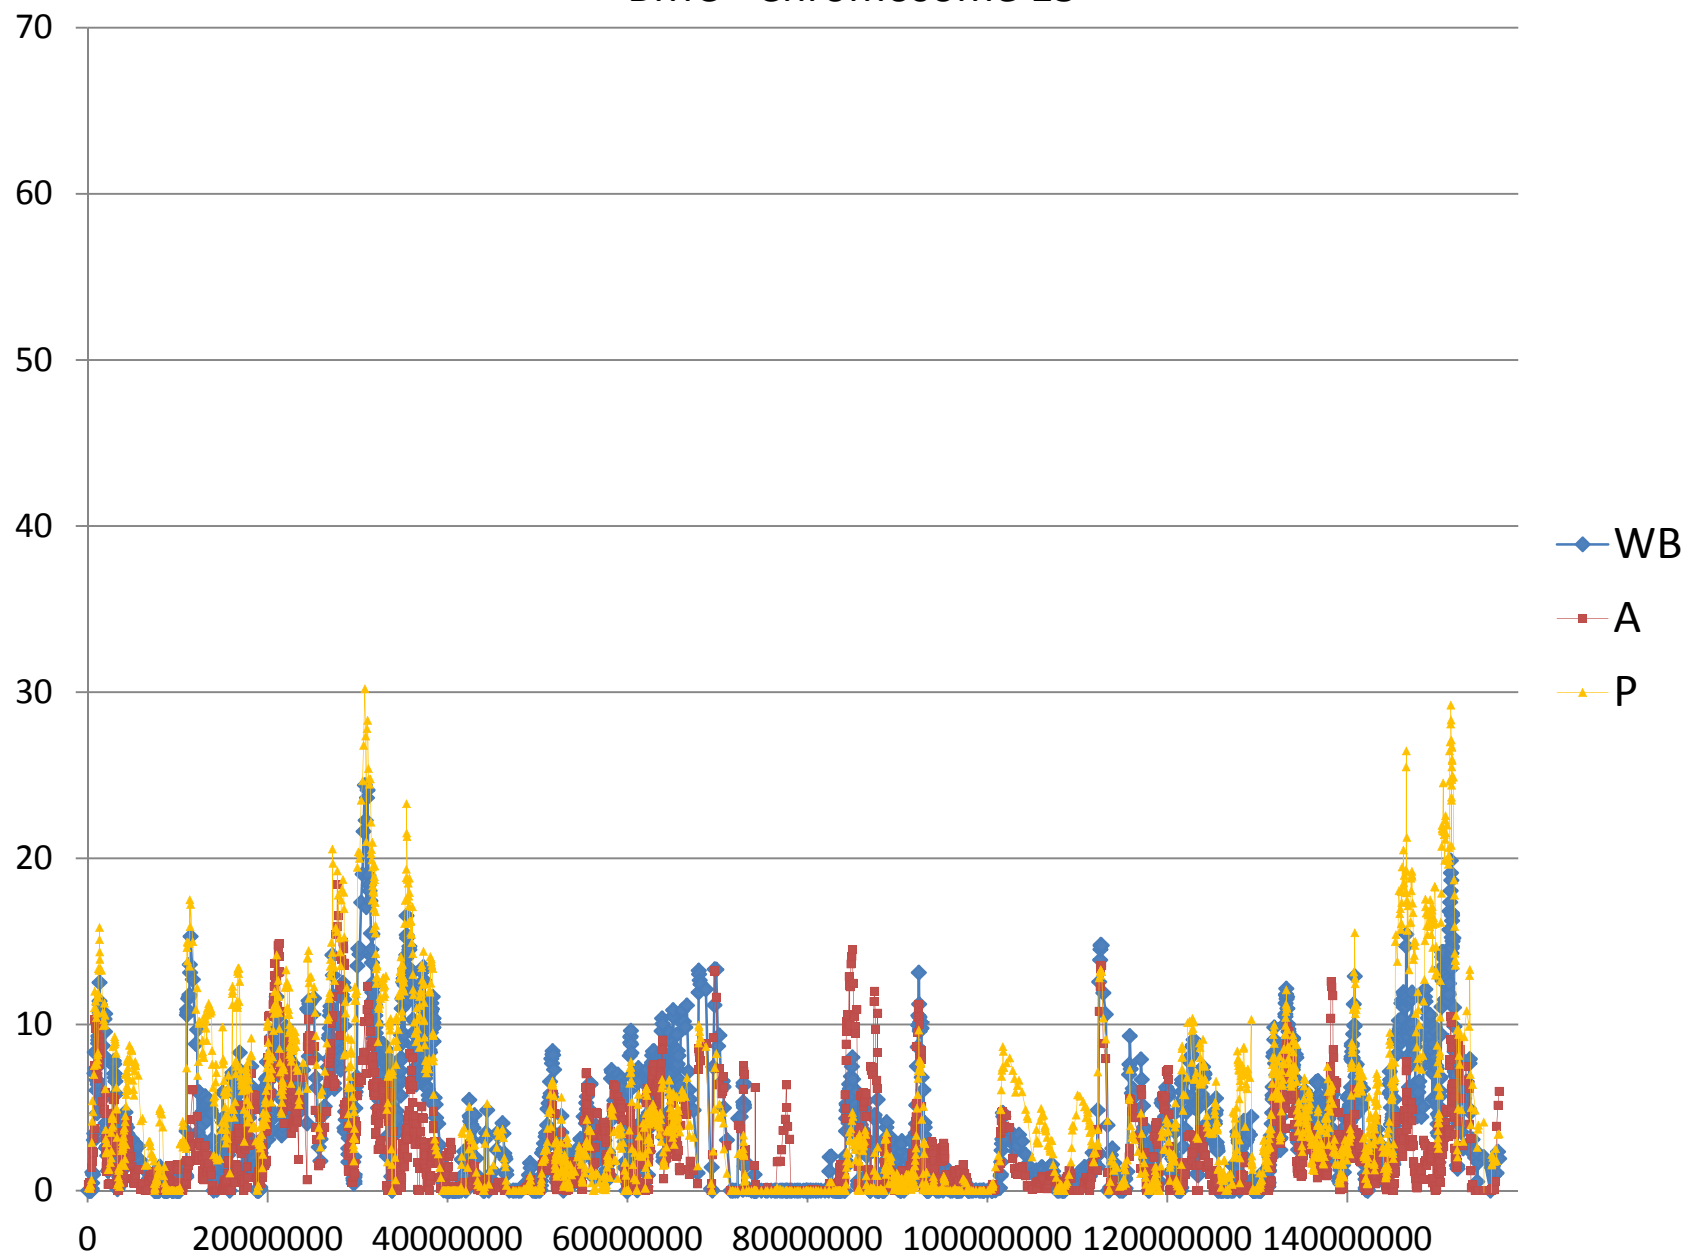

# BMC - Chromosome 16

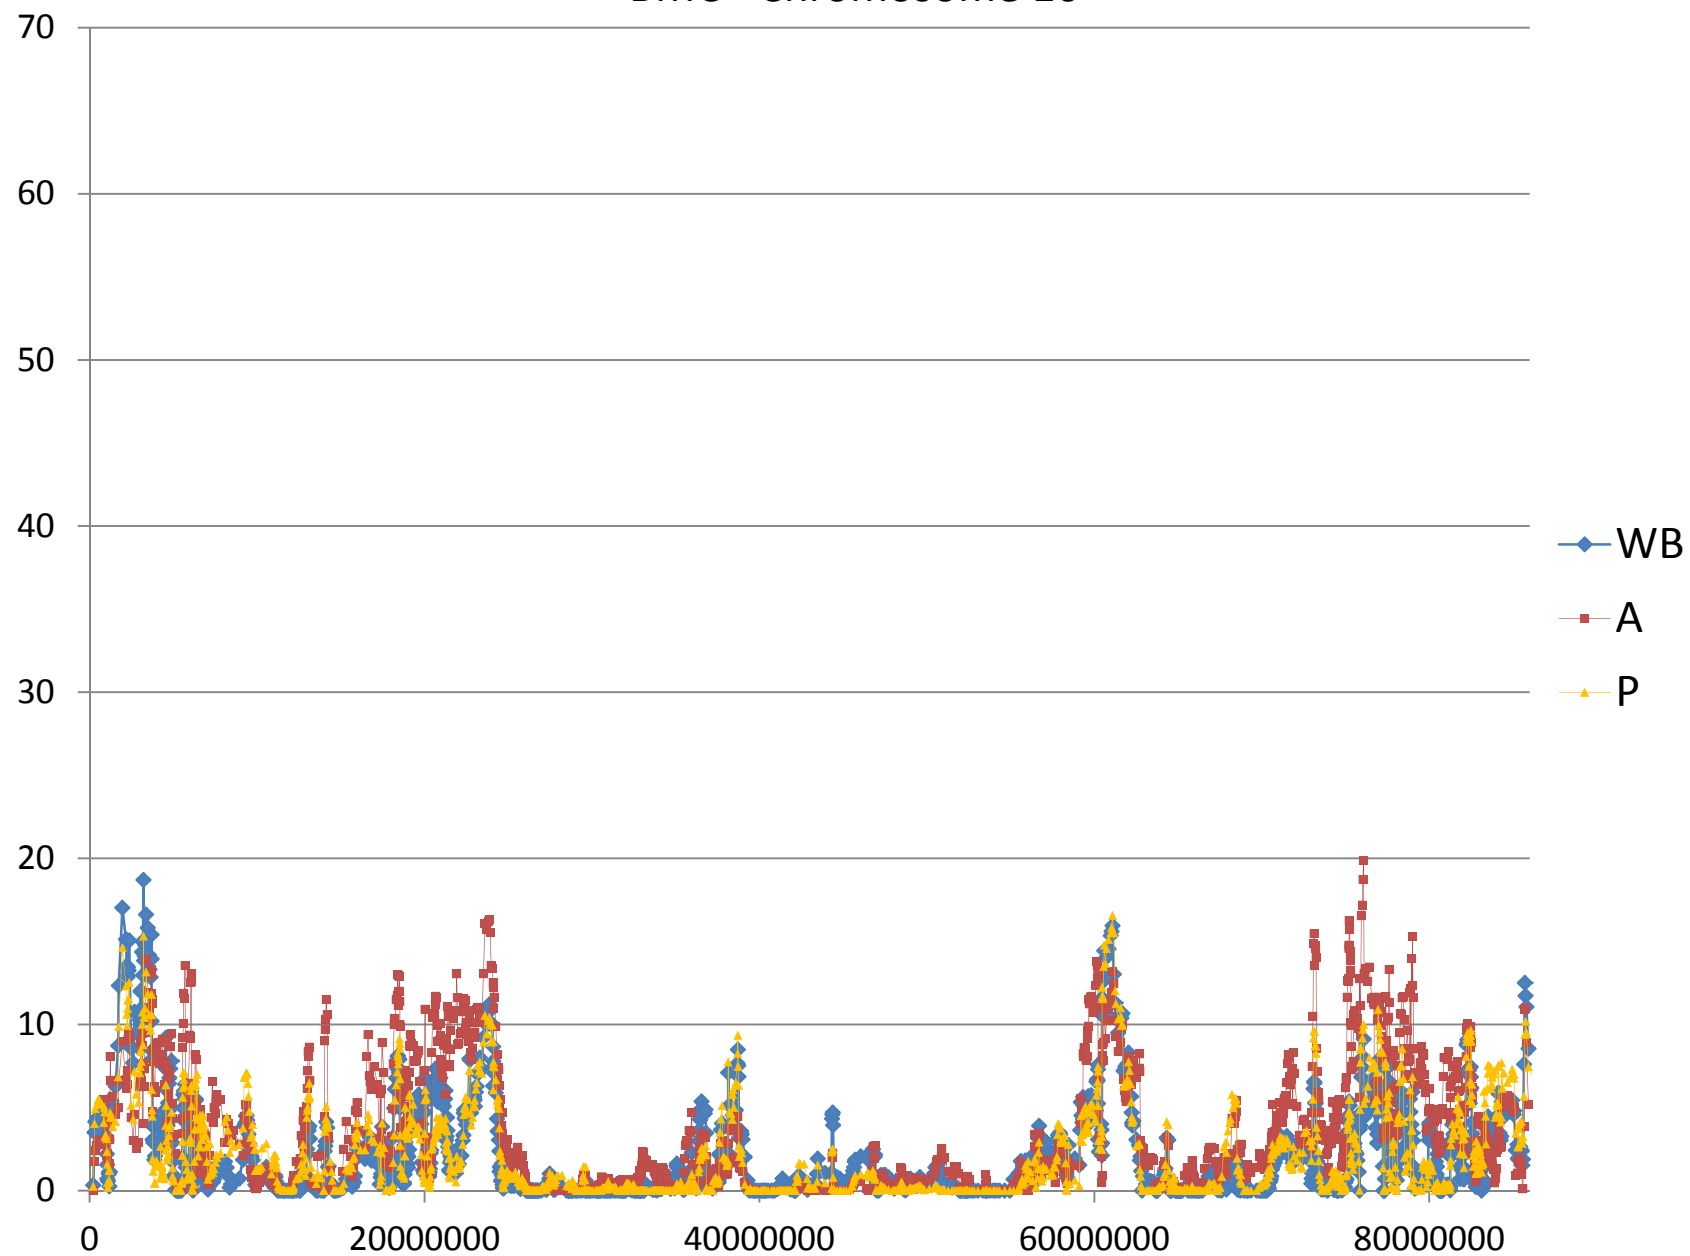



# BMC - Chromosome 17

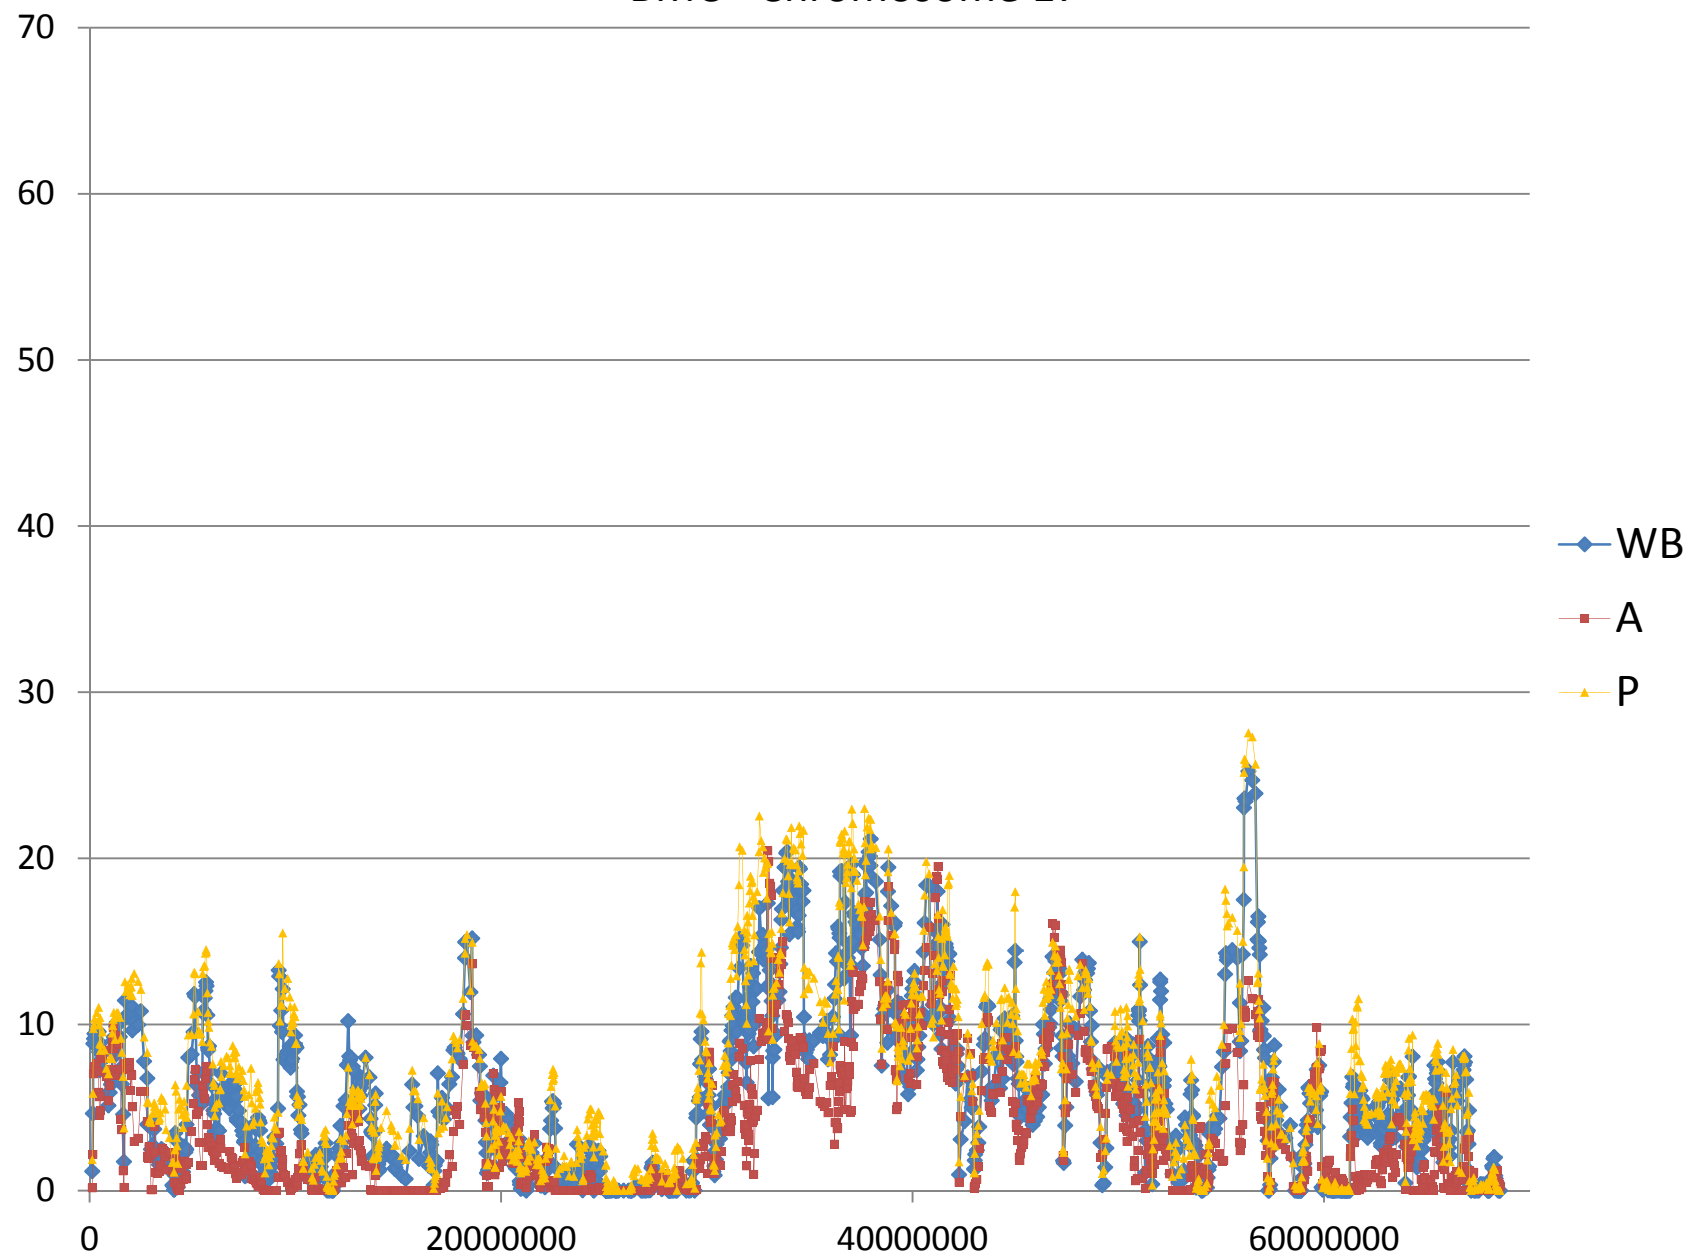

# BMC - Chromosome 18

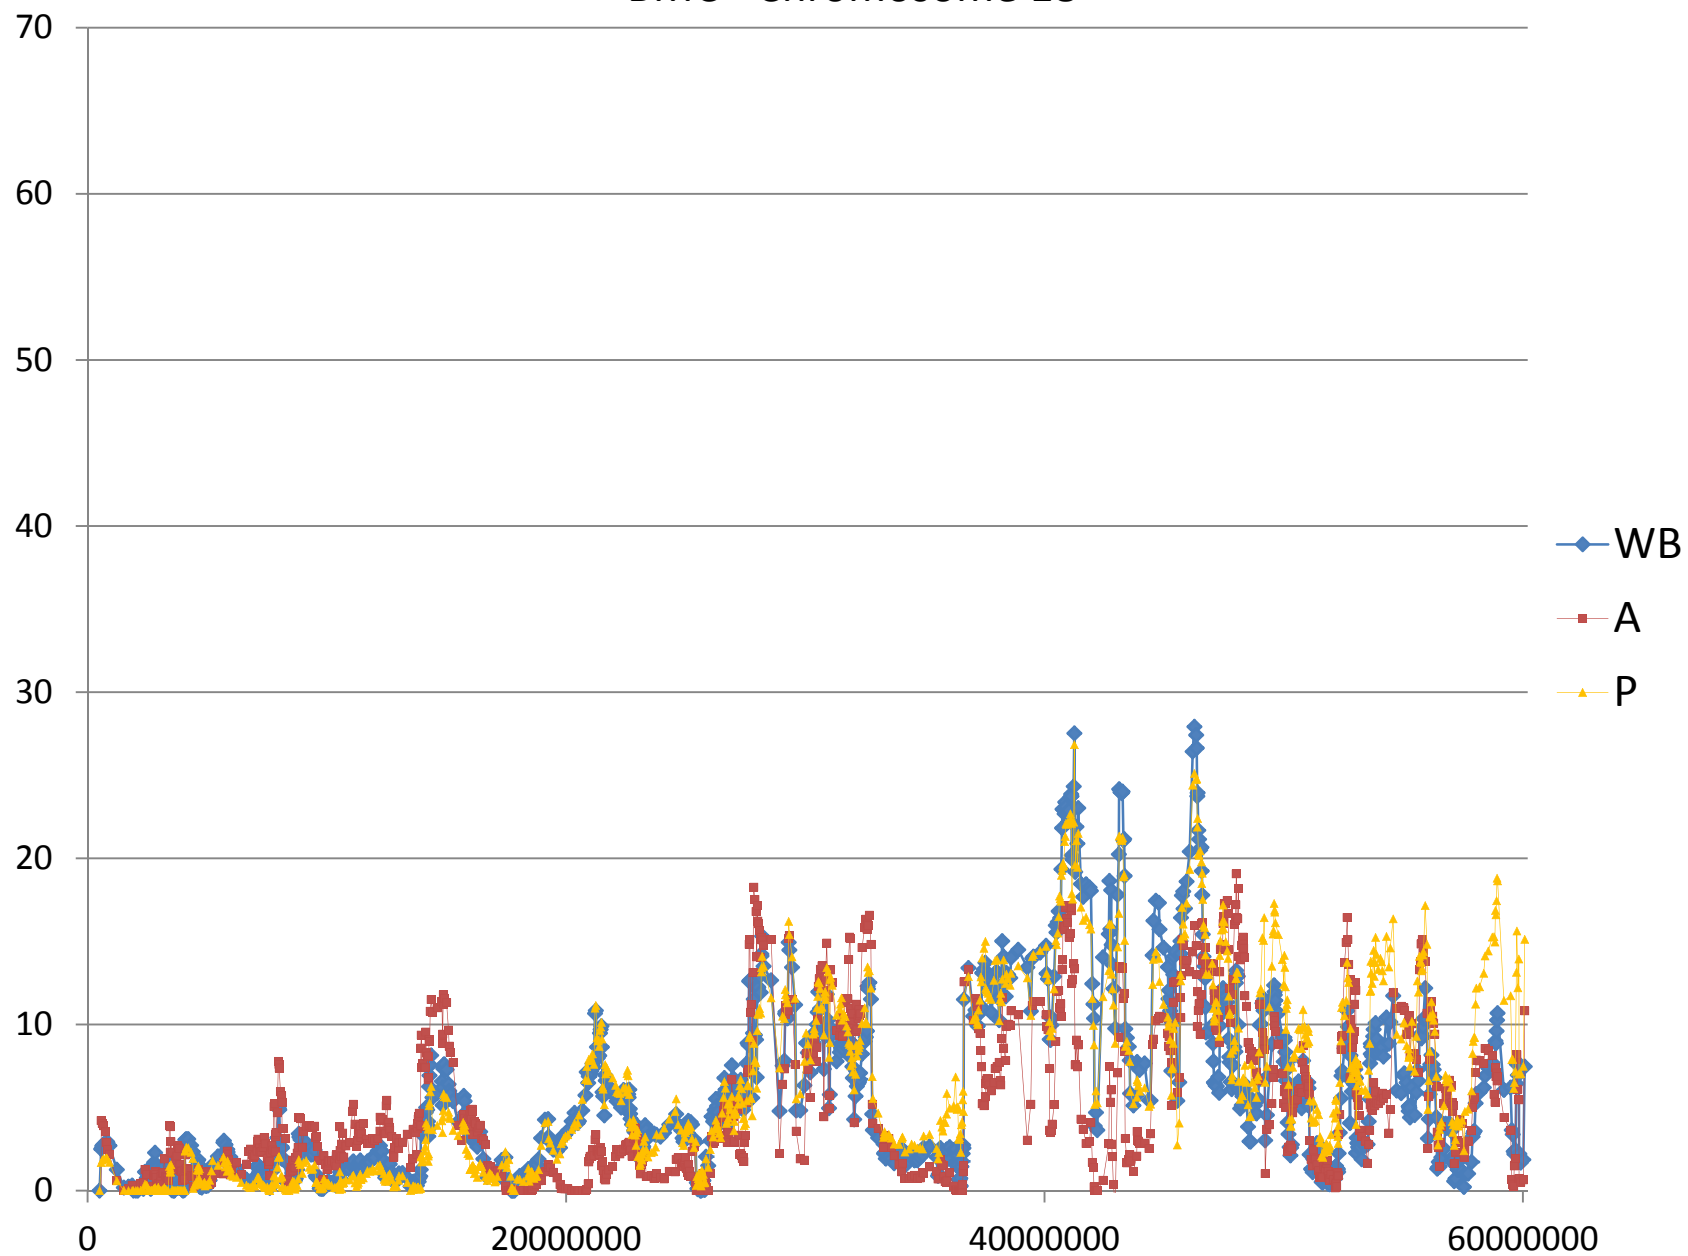

Supplement: Supplementary file 1 [file aab-60-51-2017-supplement.zip]
