# Supplementary material for: Genome-wide QTL mapping results for regional DXA body composition and bone mineral density traits in pigs
Source: Copernicus journal article supplement (doi:10.5194/aab-60-51-2017), 2017-04-05
Supplement: Supplementary file 9 [file aab-60-51-2017-supplement.zip]

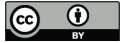

## *Supplement of*

# **Genome-wide QTL mapping results for regional DXA body composition and bone mineral density traits in pigs**

**Sophie Rothhammer et al.**

*Correspondence to:* Sophie Rothhammer (s.rothhammer@gen.vetmed.uni-muenchen.de)

- aab-60-51-2017-supplement-title-page.pdf
- Supplement\_Rothhammer\_et\_al
  - FigureS1\_BMC.pdf
  - FigureS2\_BMCPC.pdf
  - FigureS3\_BMD.pdf
  - FigureS4\_Fat.pdf
  - FigureS5\_FatPC.pdf
  - FigureS6\_Lean\_WB.pdf
  - FigureS7\_LeanPC.pdf
  - FigureS8\_R.pdf
  - TableS1 - unconfirmedQTL.xlsx

The copyright of individual parts of the supplement might differ from the CC-BY 3.0 licence.
